# Supplementary material
Source: publisher figshare collection journal article supplement (https://acs.figshare.com/ndownloader/files/6521742)
Supplement: Supplementary file 1 [file 6521742]

 
data_x
 
_audit_creation_method            SHELXL-2014
_chemical_name_systematic
;
 ?
;
_chemical_name_common             ?
_chemical_melting_point           ?
_chemical_formula_moiety          'Ag4 Sn3 S8, 2(C H6 N)'
_chemical_formula_sum
 'C2 H12 Ag4 N2 S8 Sn3' 
_chemical_formula_weight          1108.17

loop_
 _atom_type_symbol
 _atom_type_description
 _atom_type_scat_dispersion_real
 _atom_type_scat_dispersion_imag
 _atom_type_scat_source
 'C'  'C'   0.0033   0.0016
 'International Tables Vol C Tables 4.2.6.8 and 6.1.1.4'
 'H'  'H'   0.0000   0.0000
 'International Tables Vol C Tables 4.2.6.8 and 6.1.1.4'
 'N'  'N'   0.0061   0.0033
 'International Tables Vol C Tables 4.2.6.8 and 6.1.1.4'
 'S'  'S'   0.1246   0.1234
 'International Tables Vol C Tables 4.2.6.8 and 6.1.1.4'
 'Ag'  'Ag'  -0.8971   1.1015
 'International Tables Vol C Tables 4.2.6.8 and 6.1.1.4'
 'Sn'  'Sn'  -0.6537   1.4246
 'International Tables Vol C Tables 4.2.6.8 and 6.1.1.4'
 
_space_group_crystal_system       orthorhombic
_space_group_IT_number            62
_space_group_name_H-M_alt         'P n m a'
_space_group_name_Hall            '-P 2ac 2n'
 
_shelx_space_group_comment
;
The symmetry employed for this shelxl refinement is uniquely defined
by the following loop, which should always be used as a source of
symmetry information in preference to the above space-group names.
They are only intended as comments.
;
 
loop_
 _space_group_symop_operation_xyz
 'x, y, z'
 '-x+1/2, -y, z+1/2'
 'x+1/2, -y+1/2, -z+1/2'
 '-x, y+1/2, -z'
 '-x, -y, -z'
 'x-1/2, y, -z-1/2'
 '-x-1/2, y-1/2, z-1/2'
 'x, -y-1/2, z'
 
_cell_length_a                    19.378(9)
_cell_length_b                    7.390(3)
_cell_length_c                    13.683(7)
_cell_angle_alpha                 90
_cell_angle_beta                  90
_cell_angle_gamma                 90
_cell_volume                      1959.5(16)
_cell_formula_units_Z             4
_cell_measurement_temperature     100(2)
_cell_measurement_reflns_used     5173
_cell_measurement_theta_min       2.1020 
_cell_measurement_theta_max       27.5010 
 
_exptl_crystal_description        needle 
_exptl_crystal_colour             yellow 
_exptl_crystal_density_meas       ? 
_exptl_crystal_density_method     'not measured'              
_exptl_crystal_density_diffrn     3.756          
_exptl_crystal_F_000              2016
_exptl_transmission_factor_min    ?                                             
_exptl_transmission_factor_max    ?                                             
_exptl_crystal_size_max           0.2 
_exptl_crystal_size_mid           0.05 
_exptl_crystal_size_min           0.02 
_exptl_absorpt_coefficient_mu     8.512
_shelx_estimated_absorpt_T_min    ? 
_shelx_estimated_absorpt_T_max    ?
_exptl_absorpt_correction_type    'Multi-scan'
_exptl_absorpt_correction_T_min   0.6930 
_exptl_absorpt_correction_T_max   1.0000 
_exptl_absorpt_process_details    
;
RIGAKU/MSC(2004), CrystalClear Version 1.3.6,  
  Rigaku/MSC, 9009 New Trails Drive, The Woodlands, TX77381-5209, USA
Empirical absorption correction using spherical harmonics,
 implemented in SCALE3 ABSPACK scaling algorithm.
;
 
_exptl_special_details
;
 ?
;
 
_diffrn_ambient_temperature       100(2)
_diffrn_radiation_wavelength      0.71073
_diffrn_radiation_type            MoK\a
_diffrn_source                    'Sealed Tube'                       
_diffrn_measurement_device_type   'Molybdenum'
_diffrn_measurement_method        'CCD_Profile_fitting'
_diffrn_detector_area_resol_mean  28.5714 
_diffrn_reflns_number             14609
_diffrn_reflns_av_unetI/netI      0.0300
_diffrn_reflns_av_R_equivalents   0.0450
_diffrn_reflns_limit_h_min        -24
_diffrn_reflns_limit_h_max        25
_diffrn_reflns_limit_k_min        -9
_diffrn_reflns_limit_k_max        9
_diffrn_reflns_limit_l_min        -17
_diffrn_reflns_limit_l_max        17
_diffrn_reflns_theta_min          2.102
_diffrn_reflns_theta_max          27.436
_diffrn_reflns_theta_full         25.242
_diffrn_measured_fraction_theta_max   0.992
_diffrn_measured_fraction_theta_full  0.997
_diffrn_reflns_Laue_measured_fraction_max    0.992
_diffrn_reflns_Laue_measured_fraction_full   0.997
_diffrn_reflns_point_group_measured_fraction_max   0.992
_diffrn_reflns_point_group_measured_fraction_full  0.997
_reflns_number_total              2390
_reflns_number_gt                 2183
_reflns_threshold_expression      'I > 2\s(I)'
_reflns_Friedel_coverage          0.000
_reflns_Friedel_fraction_max      .
_reflns_Friedel_fraction_full     .
 
_reflns_special_details
;
 Reflections were merged by SHELXL according to the crystal
 class for the calculation of statistics and refinement.
 
 _reflns_Friedel_fraction is defined as the number of unique
 Friedel pairs measured divided by the number that would be
 possible theoretically, ignoring centric projections and
 systematic absences.
;
 
_computing_data_collection        'CrystalClear (Rigaku Inc., 2008)'
_computing_cell_refinement        'CrystalClear (Rigaku Inc., 2008)'
_computing_data_reduction         'CrystalClear (Rigaku Inc., 2008)'
_computing_structure_solution     'SHELXL-2014 (Sheldrick, 2014)'
_computing_structure_refinement   'SHELXL-2014 (Sheldrick, 2014)'
_computing_molecular_graphics     'DIAMOND. Version 3.2. Crystal Impact' 
_computing_publication_material   'Windows Word 2010' 
 
_refine_special_details
;
 ?
;
_refine_ls_structure_factor_coef  Fsqd
_refine_ls_matrix_type            full
_refine_ls_weighting_scheme       calc
_refine_ls_weighting_details
'w=1/[\s^2^(Fo^2^)+(0.0380P)^2^] where P=(Fo^2^+2Fc^2^)/3'
_atom_sites_solution_primary      ?
_atom_sites_solution_secondary    ?
_atom_sites_solution_hydrogens    geom
_refine_ls_hydrogen_treatment     constr
_refine_ls_extinction_method      none
_refine_ls_extinction_coef        .
_refine_ls_number_reflns          2390
_refine_ls_number_parameters      107
_refine_ls_number_restraints      0
_refine_ls_R_factor_all           0.0342
_refine_ls_R_factor_gt            0.0287
_refine_ls_wR_factor_ref          0.0662
_refine_ls_wR_factor_gt           0.0630
_refine_ls_goodness_of_fit_ref    0.995
_refine_ls_restrained_S_all       0.995
_refine_ls_shift/su_max           0.001
_refine_ls_shift/su_mean          0.000
 
loop_
 _atom_site_label
 _atom_site_type_symbol
 _atom_site_fract_x
 _atom_site_fract_y
 _atom_site_fract_z
 _atom_site_U_iso_or_equiv
 _atom_site_adp_type
 _atom_site_occupancy
 _atom_site_site_symmetry_order  
 _atom_site_calc_flag
 _atom_site_refinement_flags_posn
 _atom_site_refinement_flags_adp
 _atom_site_refinement_flags_occupancy
 _atom_site_disorder_assembly
 _atom_site_disorder_group
Ag1 Ag 0.31197(2) 0.53941(6) 0.38818(3) 0.03868(13) Uani 1 1 d . . . . .
Ag2 Ag 0.41536(2) 0.45592(6) 0.56760(4) 0.04572(14) Uani 1 1 d . . . . .
Sn1 Sn 0.46214(2) 0.2500 0.31882(3) 0.02053(11) Uani 1 2 d S T P . .
Sn2 Sn 0.42366(2) 0.7500 0.28551(3) 0.02016(11) Uani 1 2 d S T P . .
Sn3 Sn 0.25029(2) 0.7500 0.14268(3) 0.01918(11) Uani 1 2 d S T P . .
S1 S 0.50327(8) 0.2500 0.48370(11) 0.0231(3) Uani 1 2 d S T P . .
S2 S 0.51603(5) -0.01202(16) 0.24577(9) 0.0254(2) Uani 1 1 d . . . . .
S3 S 0.34099(8) 0.2500 0.29288(12) 0.0272(4) Uani 1 2 d S T P . .
S4 S 0.37393(8) 0.7500 0.11540(12) 0.0309(4) Uani 1 2 d S T P . .
S5 S 0.21887(8) 0.7500 0.31172(11) 0.0259(4) Uani 1 2 d S T P . .
S6 S 0.29147(6) 0.52461(16) 0.57234(8) 0.0252(3) Uani 1 1 d . . . . .
C1 C 0.1546(4) 0.2500 0.3738(5) 0.0427(19) Uani 1 2 d S T P . .
H1A H 0.1961 0.2099 0.4085 0.064 Uiso 0.5 1 calc R U P . .
H1B H 0.1164 0.1675 0.3884 0.064 Uiso 0.5 1 calc R U P . .
H1C H 0.1425 0.3726 0.3950 0.064 Uiso 0.5 1 calc R U P . .
N2 N 0.3596(4) 0.2500 0.0490(5) 0.072(3) Uani 1 2 d S T P . .
H2A H 0.3471 0.1344 0.0635 0.108 Uiso 0.5 1 calc R U P . .
H2B H 0.3289 0.2982 0.0060 0.108 Uiso 0.5 1 calc R U P . .
H2C H 0.3601 0.3174 0.1046 0.108 Uiso 0.5 1 calc R U P . .
N1 N 0.1676(3) 0.2500 0.2705(4) 0.062(2) Uani 1 2 d S T P . .
H1 H 0.1329 0.3095 0.2392 0.093 Uiso 0.5 1 calc R U P . .
H2 H 0.1697 0.1339 0.2485 0.093 Uiso 0.5 1 calc R U P . .
H3 H 0.2084 0.3066 0.2582 0.093 Uiso 0.5 1 calc R U P . .
C2 C 0.4267(5) 0.2500 0.0064(7) 0.065(3) Uani 1 2 d S T P . .
H4 H 0.4251 0.1884 -0.0570 0.098 Uiso 0.5 1 calc R U P . .
H5 H 0.4589 0.1866 0.0498 0.098 Uiso 0.5 1 calc R U P . .
H6 H 0.4422 0.3750 -0.0029 0.098 Uiso 0.5 1 calc R U P . .
 
loop_
 _atom_site_aniso_label
 _atom_site_aniso_U_11
 _atom_site_aniso_U_22
 _atom_site_aniso_U_33
 _atom_site_aniso_U_23
 _atom_site_aniso_U_13
 _atom_site_aniso_U_12
Ag1 0.0404(2) 0.0429(3) 0.0328(2) 0.00333(17) 0.00327(16) 0.00646(18)
Ag2 0.0261(2) 0.0437(3) 0.0674(3) -0.0125(2) 0.01031(18) -0.00296(18)
Sn1 0.0187(2) 0.0193(2) 0.0236(2) 0.000 -0.00161(15) 0.000
Sn2 0.0174(2) 0.0231(3) 0.0200(2) 0.000 -0.00003(14) 0.000
Sn3 0.0187(2) 0.0201(2) 0.0188(2) 0.000 -0.00262(14) 0.000
S1 0.0226(7) 0.0245(9) 0.0221(7) 0.000 -0.0008(6) 0.000
S2 0.0218(5) 0.0218(6) 0.0327(6) -0.0042(5) 0.0044(4) -0.0018(5)
S3 0.0189(7) 0.0311(10) 0.0317(9) 0.000 -0.0016(6) 0.000
S4 0.0195(8) 0.0537(12) 0.0195(8) 0.000 -0.0016(6) 0.000
S5 0.0247(8) 0.0344(10) 0.0187(7) 0.000 0.0010(6) 0.000
S6 0.0273(6) 0.0218(6) 0.0267(6) 0.0044(4) 0.0035(4) -0.0008(5)
C1 0.045(5) 0.051(5) 0.032(4) 0.000 -0.003(3) 0.000
N2 0.042(4) 0.130(8) 0.043(4) 0.000 -0.003(3) 0.000
N1 0.026(3) 0.135(8) 0.025(3) 0.000 -0.001(3) 0.000
C2 0.053(6) 0.089(8) 0.053(6) 0.000 0.009(4) 0.000
 
_geom_special_details
;
 All esds (except the esd in the dihedral angle between two l.s. planes)
 are estimated using the full covariance matrix.  The cell esds are taken
 into account individually in the estimation of esds in distances, angles
 and torsion angles; correlations between esds in cell parameters are only
 used when they are defined by crystal symmetry.  An approximate (isotropic)
 treatment of cell esds is used for estimating esds involving l.s. planes.
;
 
loop_
 _geom_bond_atom_site_label_1
 _geom_bond_atom_site_label_2
 _geom_bond_distance
 _geom_bond_site_symmetry_2
 _geom_bond_publ_flag
Ag1 S6 2.5534(17) . ?
Ag1 S3 2.5672(13) . ?
Ag1 S5 2.6023(15) . ?
Ag1 Sn2 3.0132(10) . ?
Ag1 Ag1 3.1127(17) 8_575 ?
Ag1 Ag2 3.2283(13) . ?
Ag2 S6 2.4547(16) . ?
Ag2 S1 2.5564(15) . ?
Ag2 S1 2.7753(14) 5_666 ?
Ag2 S2 2.8887(18) 4_656 ?
Ag2 Ag2 3.0436(17) 8_565 ?
Sn1 S3 2.3742(19) . ?
Sn1 S1 2.3928(19) . ?
Sn1 S2 2.4163(14) 8_565 ?
Sn1 S2 2.4164(14) . ?
Sn2 S4 2.5193(19) . ?
Sn2 S2 2.5675(14) 1_565 ?
Sn2 S2 2.5675(14) 8_565 ?
Sn2 Ag1 3.0132(10) 8_575 ?
Sn3 S6 2.3873(14) 7_665 ?
Sn3 S6 2.3874(14) 2_564 ?
Sn3 S5 2.3918(19) . ?
Sn3 S4 2.425(2) . ?
S1 Ag2 2.5563(15) 8_565 ?
S1 Ag2 2.7753(14) 5_666 ?
S1 Ag2 2.7753(14) 4_646 ?
S2 Sn2 2.5676(14) 1_545 ?
S2 Ag2 2.8887(18) 4_646 ?
S3 Ag1 2.5672(13) 8_565 ?
S5 Ag1 2.6022(15) 8_575 ?
S6 Sn3 2.3874(14) 2_565 ?
C1 N1 1.436(9) . ?
C1 H1A 0.9800 . ?
C1 H1B 0.9800 . ?
C1 H1C 0.9800 . ?
N2 C2 1.424(10) . ?
N2 H2A 0.9100 . ?
N2 H2B 0.9100 . ?
N2 H2C 0.9100 . ?
N1 H1 0.9100 . ?
N1 H2 0.9100 . ?
N1 H3 0.9100 . ?
C2 H4 0.9800 . ?
C2 H5 0.9800 . ?
C2 H6 0.9800 . ?
 
loop_
 _geom_angle_atom_site_label_1
 _geom_angle_atom_site_label_2
 _geom_angle_atom_site_label_3
 _geom_angle
 _geom_angle_site_symmetry_1
 _geom_angle_site_symmetry_3
 _geom_angle_publ_flag
S6 Ag1 S3 119.98(5) . . ?
S6 Ag1 S5 108.33(5) . . ?
S3 Ag1 S5 116.48(5) . . ?
S6 Ag1 Sn2 126.44(3) . . ?
S3 Ag1 Sn2 92.07(4) . . ?
S5 Ag1 Sn2 90.10(5) . . ?
S6 Ag1 Ag1 92.46(3) . 8_575 ?
S3 Ag1 Ag1 146.42(4) . 8_575 ?
S5 Ag1 Ag1 53.27(3) . 8_575 ?
Sn2 Ag1 Ag1 58.902(17) . 8_575 ?
S6 Ag1 Ag2 48.54(4) . . ?
S3 Ag1 Ag2 95.23(4) . . ?
S5 Ag1 Ag2 148.24(3) . . ?
Sn2 Ag1 Ag2 90.43(4) . . ?
Ag1 Ag1 Ag2 101.019(13) 8_575 . ?
S6 Ag2 S1 141.87(5) . . ?
S6 Ag2 S1 113.60(5) . 5_666 ?
S1 Ag2 S1 88.51(4) . 5_666 ?
S6 Ag2 S2 114.19(4) . 4_656 ?
S1 Ag2 S2 98.00(5) . 4_656 ?
S1 Ag2 S2 84.14(5) 5_666 4_656 ?
S6 Ag2 Ag2 101.94(3) . 8_565 ?
S1 Ag2 Ag2 53.47(3) . 8_565 ?
S1 Ag2 Ag2 141.54(3) 5_666 8_565 ?
S2 Ag2 Ag2 94.71(3) 4_656 8_565 ?
S6 Ag2 Ag1 51.22(3) . . ?
S1 Ag2 Ag1 100.71(5) . . ?
S1 Ag2 Ag1 90.61(4) 5_666 . ?
S2 Ag2 Ag1 160.43(3) 4_656 . ?
Ag2 Ag2 Ag1 101.019(13) 8_565 . ?
S3 Sn1 S1 118.05(6) . . ?
S3 Sn1 S2 111.44(4) . 8_565 ?
S1 Sn1 S2 104.25(4) . 8_565 ?
S3 Sn1 S2 111.44(4) . . ?
S1 Sn1 S2 104.25(4) . . ?
S2 Sn1 S2 106.52(7) 8_565 . ?
S4 Sn2 S2 94.07(4) . 1_565 ?
S4 Sn2 S2 94.07(4) . 8_565 ?
S2 Sn2 S2 86.47(6) 1_565 8_565 ?
S4 Sn2 Ag1 98.97(4) . . ?
S2 Sn2 Ag1 162.40(3) 1_565 . ?
S2 Sn2 Ag1 104.22(4) 8_565 . ?
S4 Sn2 Ag1 98.97(4) . 8_575 ?
S2 Sn2 Ag1 104.22(4) 1_565 8_575 ?
S2 Sn2 Ag1 162.41(3) 8_565 8_575 ?
Ag1 Sn2 Ag1 62.20(3) . 8_575 ?
S6 Sn3 S6 116.44(7) 7_665 2_564 ?
S6 Sn3 S5 107.67(4) 7_665 . ?
S6 Sn3 S5 107.67(4) 2_564 . ?
S6 Sn3 S4 105.83(4) 7_665 . ?
S6 Sn3 S4 105.83(4) 2_564 . ?
S5 Sn3 S4 113.60(5) . . ?
Sn1 S1 Ag2 101.62(6) . 8_565 ?
Sn1 S1 Ag2 101.62(6) . . ?
Ag2 S1 Ag2 73.07(6) 8_565 . ?
Sn1 S1 Ag2 87.18(4) . 5_666 ?
Ag2 S1 Ag2 163.40(5) 8_565 5_666 ?
Ag2 S1 Ag2 91.49(4) . 5_666 ?
Sn1 S1 Ag2 87.18(4) . 4_646 ?
Ag2 S1 Ag2 91.49(4) 8_565 4_646 ?
Ag2 S1 Ag2 163.40(5) . 4_646 ?
Ag2 S1 Ag2 103.09(6) 5_666 4_646 ?
Sn1 S2 Sn2 99.21(5) . 1_545 ?
Sn1 S2 Ag2 84.20(4) . 4_646 ?
Sn2 S2 Ag2 94.44(4) 1_545 4_646 ?
Sn1 S3 Ag1 98.09(4) . 8_565 ?
Sn1 S3 Ag1 98.09(4) . . ?
Ag1 S3 Ag1 112.84(7) 8_565 . ?
Sn3 S4 Sn2 103.64(6) . . ?
Sn3 S5 Ag1 102.25(5) . 8_575 ?
Sn3 S5 Ag1 102.25(5) . . ?
Ag1 S5 Ag1 73.46(6) 8_575 . ?
Sn3 S6 Ag2 99.58(5) 2_565 . ?
Sn3 S6 Ag1 119.14(5) 2_565 . ?
Ag2 S6 Ag1 80.25(4) . . ?
N1 C1 H1A 109.5 . . ?
N1 C1 H1B 109.5 . . ?
H1A C1 H1B 109.5 . . ?
N1 C1 H1C 109.5 . . ?
H1A C1 H1C 109.5 . . ?
H1B C1 H1C 109.5 . . ?
C2 N2 H2A 109.5 . . ?
C2 N2 H2B 109.5 . . ?
H2A N2 H2B 109.5 . . ?
C2 N2 H2C 109.5 . . ?
H2A N2 H2C 109.5 . . ?
H2B N2 H2C 109.5 . . ?
C1 N1 H1 109.5 . . ?
C1 N1 H2 109.5 . . ?
H1 N1 H2 109.5 . . ?
C1 N1 H3 109.5 . . ?
H1 N1 H3 109.5 . . ?
H2 N1 H3 109.5 . . ?
N2 C2 H4 109.5 . . ?
N2 C2 H5 109.5 . . ?
H4 C2 H5 109.5 . . ?
N2 C2 H6 109.5 . . ?
H4 C2 H6 109.5 . . ?
H5 C2 H6 109.5 . . ?
 
loop_
 _geom_hbond_atom_site_label_D 
 _geom_hbond_atom_site_label_H 
 _geom_hbond_atom_site_label_A 
 _geom_hbond_distance_DH 
 _geom_hbond_distance_HA 
 _geom_hbond_distance_DA 
 _geom_hbond_angle_DHA 
 _geom_hbond_site_symmetry_A 

N2 H2A S6  0.91 2.81 3.384(6) 122.4 7_655
N2 H2B S5  0.91 2.84 3.585(8) 140.4 2_564
N2 H2B S6  0.91 2.82 3.384(6) 120.9 2_564
N2 H2C S3  0.91 2.65 3.357(8) 135.2 .
N1 H1 S2  0.91 2.72 3.525(5) 147.6 3_455
N1 H2 S6  0.91 2.65 3.279(5) 126.9 7_655
N1 H3 S3  0.91 2.65 3.374(6) 137.6 .
N1 H3 S6  0.91 2.83 3.279(5) 111.6 2_564
 
_refine_diff_density_max    1.278
_refine_diff_density_min   -1.257
_refine_diff_density_rms    0.186

_shelxl_version_number 2014-3

_shelx_res_file
;
TITL b in Pnma
CELL 0.71073 19.3779 7.3902 13.6830 90.000 90.000 90.000
ZERR 4.0000 0.0090 0.0034 0.0068 0.000 0.000 0.000
LATT 1
SYMM 0.5-X, -Y, 0.5+Z
SYMM 0.5+X, 0.5-Y, 0.5-Z
SYMM -X, 0.5+Y, -Z
SFAC C H N S AG SN
UNIT 8 48 8 32 16 12
ACTA
MERG 2
FMAP 2
GRID
PLAN 20
TEMP -173
EQIV $1 X,-Y-1/2,Z
BOND $H
EQIV $2 x-1/2, y, -z+1/2
HTAB C1 S2_$2
EQIV $3 x, y-1, z
HTAB N2 S4_$3
EQIV $4 -x+1/2, y-1/2, z-1/2
HTAB N2 S6_$4
EQIV $5 -x+1/2, -y+1, z-1/2
HTAB N2 S5_$5
HTAB N2 S6_$5
HTAB N2 S3
EQIV $6 x-1/2, -y+1/2, -z+1/2
HTAB N1 S2_$6
HTAB N1 S6_$4
HTAB N1 S3
HTAB N1 S6_$5

L.S. 20
WGHT    0.038000
FVAR       0.11162
AG1   5    0.311974    0.539407    0.388175    11.00000    0.04037    0.04291 =
         0.03277    0.00333    0.00327    0.00646
AG2   5    0.415362    0.455919    0.567600    11.00000    0.02606    0.04367 =
         0.06743   -0.01254    0.01031   -0.00296
SN1   6    0.462139    0.250000    0.318816    10.50000    0.01870    0.01931 =
         0.02357    0.00000   -0.00161    0.00000
SN2   6    0.423660    0.750000    0.285511    10.50000    0.01742    0.02310 =
         0.01995    0.00000   -0.00003    0.00000
SN3   6    0.250289    0.750000    0.142676    10.50000    0.01868    0.02008 =
         0.01879    0.00000   -0.00262    0.00000
S1    4    0.503265    0.250000    0.483703    10.50000    0.02264    0.02451 =
         0.02208    0.00000   -0.00079    0.00000
S2    4    0.516028   -0.012019    0.245770    11.00000    0.02183    0.02180 =
         0.03270   -0.00423    0.00445   -0.00183
S3    4    0.340993    0.250000    0.292884    10.50000    0.01888    0.03109 =
         0.03167    0.00000   -0.00157    0.00000
S4    4    0.373925    0.750000    0.115401    10.50000    0.01948    0.05374 =
         0.01954    0.00000   -0.00161    0.00000
S5    4    0.218866    0.750000    0.311718    10.50000    0.02470    0.03437 =
         0.01869    0.00000    0.00100    0.00000
S6    4    0.291469    0.524608    0.572338    11.00000    0.02727    0.02179 =
         0.02668    0.00445    0.00352   -0.00081
C1    1    0.154594    0.250000    0.373791    10.50000    0.04485    0.05091 =
         0.03231    0.00000   -0.00327    0.00000
AFIX 137
H1A   2    0.196099    0.209888    0.408508    10.50000   -1.50000
H1B   2    0.116365    0.167506    0.388399    10.50000   -1.50000
H1C   2    0.142451    0.372606    0.394978    10.50000   -1.50000
AFIX   0
N2    3    0.359618    0.250000    0.048967    10.50000    0.04184    0.13025 =
         0.04338    0.00000   -0.00282    0.00000
AFIX 137
H2A   2    0.347066    0.134439    0.063509    10.50000   -1.50000
H2B   2    0.328862    0.298155    0.005963    10.50000   -1.50000
H2C   2    0.360071    0.317405    0.104620    10.50000   -1.50000
AFIX   0
N1    3    0.167588    0.250000    0.270456    10.50000    0.02556    0.13502 =
         0.02535    0.00000   -0.00111    0.00000
AFIX 137
H1    2    0.132903    0.309500    0.239191    10.50000   -1.50000
H2    2    0.169700    0.133918    0.248471    10.50000   -1.50000
H3    2    0.208394    0.306582    0.258230    10.50000   -1.50000
AFIX   0
C2    1    0.426684    0.250000    0.006415    10.50000    0.05347    0.08860 =
         0.05322    0.00000    0.00926    0.00000
AFIX 137
H4    2    0.425109    0.188354   -0.056958    10.50000   -1.50000
H5    2    0.458873    0.186626    0.049774    10.50000   -1.50000
H6    2    0.442224    0.375020   -0.002854    10.50000   -1.50000
AFIX   0
HKLF 4

REM  b in Pnma
REM R1 =  0.0287 for    2183 Fo > 4sig(Fo)  and  0.0342 for all    2390 data
REM    107 parameters refined using      0 restraints

END

WGHT      0.0311      0.0000

REM Highest difference peak  1.278,  deepest hole -1.257,  1-sigma level  0.186
Q1    1   0.4112  0.4040  0.6222  11.00000  0.05    1.28
Q2    1   0.3067  0.4271  0.4054  11.00000  0.05    1.12
Q3    1   0.4607  0.1027  0.3256  11.00000  0.05    1.02
Q4    1   0.4124  0.5865  0.5662  11.00000  0.05    0.98
Q5    1   0.3998  0.4106  0.5344  11.00000  0.05    0.98
Q6    1   0.2564  0.8991  0.1452  11.00000  0.05    0.82
Q7    1   0.4211  0.8958  0.2866  11.00000  0.05    0.77
Q8    1   0.3094  0.5452  0.3351  11.00000  0.05    0.77
Q9    1   0.4178  0.7500  0.3534  10.50000  0.05    0.66
Q10   1   0.2492  0.8036  0.0829  11.00000  0.05    0.60
Q11   1   0.2918  0.2500  0.4650  10.50000  0.05    0.60
Q12   1   0.5001  0.7500  0.2925  10.50000  0.05    0.59
Q13   1   0.2396  0.8094  0.2024  11.00000  0.05    0.58
Q14   1   0.2899  0.6953  0.3875  11.00000  0.05    0.56
Q15   1   0.4607  0.2500  0.2580  10.50000  0.05    0.56
Q16   1   0.4095  0.5067  0.6437  11.00000  0.05    0.55
Q17   1   0.4087  0.8153  0.2380  11.00000  0.05    0.55
Q18   1   0.5738 -0.2500  0.2188  10.50000  0.05    0.54
Q19   1   0.4383  0.3135  0.5736  11.00000  0.05    0.52
Q20   1   0.4021  0.3103  0.5615  11.00000  0.05    0.52
;
_shelx_res_checksum   28500

_shelx_hkl_file
;
   2   0   0    6.13    1.33
  -2   0   0    5.21    1.17
   2   0   0    4.96    0.82
  -2   0   0    3.69    0.49
  -2   0   0    5.14    1.09
   2   0   0    5.50    1.14
   3   0   0    0.23    0.72
  -3   0   0    0.34    0.46
   3   0   0    0.76    1.01
  -3   0   0    0.18    0.53
  -3   0   0   -0.13    0.44
   3   0   0    0.40    0.50
   4   0   0  280.33    4.08
   4   0   0  268.90    4.16
  -4   0   0  272.07    3.82
   4   0   0  251.45    3.31
   5   0   0    2.89    0.96
   5   0   0    1.10    1.44
  -5   0   0    0.38    0.56
   5   0   0    0.14    0.37
   6   0   0  542.91    6.87
   6   0   0  544.16    7.21
  -6   0   0  514.65    5.75
   7   0   0   -0.11    0.97
   7   0   0    2.28    2.87
  -7   0   0   -0.09    0.79
   8   0   0 1233.77   11.05
   8   0   0 1255.33   12.29
  -8   0   0 1245.03   10.79
   9   0   0   -0.23    0.92
   9   0   0    2.96    3.02
  -9   0   0    1.16    1.33
  10   0   0  362.93    9.36
  10   0   0  359.28    9.99
 -10   0   0  398.48   10.21
  11   0   0    0.37    0.69
  11   0   0    0.80    1.89
 -11   0   0   -0.02    1.20
  12   0   0 1074.08   32.66
  12   0   0 1071.48   32.72
 -12   0   0 1127.85   33.76
  13   0   0   -0.01    1.06
  13   0   0    2.87    1.98
 -13   0   0    0.25    1.10
  14   0   0    6.23    2.64
  14   0   0    9.87    4.55
  15   0   0    0.88    1.91
  15   0   0    0.83    3.26
  16   0   0   17.25    4.30
  17   0   0    2.77    4.52
 -18   0   0 1394.18   51.38
  18   0   0 1394.43   21.44
 -19   0   0    0.72    1.40
  19   0   0    1.66    2.50
 -20   0   0   12.04    2.65
  20   0   0   12.47    3.82
 -21   0   0    0.62    1.21
  21   0   0    2.26    2.97
 -22   0   0    2.46    2.15
  22   0   0    2.11    4.06
  23   0   0    0.99    2.34
  24   0   0  378.95   13.64
  25   0   0    2.88    3.70
   2   0  -1  753.79    4.18
  -2   0  -1  797.62    4.52
   2   0   1  790.03    4.47
   2   0   1  775.57    4.56
  -2   0  -1  780.38    4.51
   2   0  -1  781.49    4.49
  -2   0   1  755.60    4.15
   3   0  -1  221.98    2.87
  -3   0   1  217.72    2.77
  -3   0  -1  234.70    3.10
   3   0   1  231.18    3.14
   3   0   1  235.50    3.30
  -3   0  -1  238.78    3.36
  -3   0   1  214.85    2.85
  -3   0   1  215.70    2.72
  -4   0  -1    1.80    0.58
   4   0  -1    0.99    0.94
  -4   0   1    1.42    0.54
  -4   0  -1    1.46    0.79
   4   0  -1    2.30    1.11
   4   0   1    1.05    0.80
  -4   0   1    0.96    0.46
   4   0  -1    0.89    0.51
   5   0  -1  226.65    4.64
  -5   0  -1  235.55    4.73
   5   0   1  240.84    4.74
   5   0  -1  226.08    4.34
  -5   0   1  234.76    5.10
   6   0  -1  284.25    5.72
  -6   0  -1  298.52    6.03
   6   0   1  291.22    5.59
   6   0  -1  289.47    5.53
  -6   0   1  287.16    5.58
   7   0   1 1995.75   14.22
   7   0  -1 1897.52   13.50
   8   0  -1  338.02    7.18
   8   0   1  334.03    9.09
   8   0  -1  328.00    6.68
  -8   0   1  338.15    6.64
   9   0  -1   14.31    5.00
   9   0   1   16.39    6.01
   9   0  -1   11.28    2.35
  -9   0   1   13.85    4.09
  10   0  -1  311.58    9.38
  10   0   1  265.76    8.18
  10   0  -1  265.74    8.02
 -10   0   1  282.16    7.85
  11   0  -1 1626.21   47.48
 -11   0  -1 1582.96   46.16
  11   0   1 1640.79   48.26
  11   0  -1 1609.42   47.29
 -11   0   1 1657.82   48.75
  12   0  -1    8.87    3.15
 -12   0  -1   11.54    3.84
  12   0   1    8.58    2.45
  12   0  -1    8.26    2.08
 -12   0   1   12.16    3.53
  13   0  -1    1.87    1.89
 -13   0  -1    2.39    1.98
  13   0   1    2.08    2.86
  13   0  -1    3.34    2.93
 -13   0   1    1.91    0.95
  14   0  -1  381.95   17.03
 -14   0  -1  352.97   15.40
  14   0   1  343.88   15.79
  14   0  -1  371.53   16.78
 -14   0   1  409.17   17.81
  15   0  -1   12.26    4.74
 -15   0  -1   10.76    2.60
  15   0   1    9.27    2.95
  15   0  -1    9.07    3.38
 -15   0   1   14.40    6.00
  16   0  -1   57.33    8.01
  16   0   1   62.33    9.61
  16   0  -1   74.14   13.79
 -16   0   1   73.27   13.03
  17   0  -1  243.86   14.28
 -17   0  -1  234.92   14.01
  17   0   1  275.10   24.26
  17   0  -1  261.38   21.28
 -17   0   1  250.79   14.28
 -18   0  -1    5.23    2.00
  18   0   1    7.02    3.33
  18   0  -1    6.08    2.82
 -19   0  -1  105.34   11.46
  19   0   1  113.45   11.47
  19   0  -1  121.35    9.47
 -20   0  -1  209.42   10.97
  20   0   1  224.06   15.12
  20   0  -1  227.75   13.01
 -21   0  -1   52.30    5.54
 -21   0   1   37.15   11.77
  21   0   1   62.42    7.47
  21   0  -1   56.80    6.57
 -22   0  -1   23.14    8.44
  22   0   1   38.61    9.36
  22   0  -1   30.62   13.41
  23   0   1   74.02    9.42
  23   0  -1   62.93    9.88
  24   0   1  164.59   16.34
  24   0  -1  157.86   15.95
  25   0   1   67.33   11.40
  25   0  -1   61.40   11.73
   0   0  -2  112.87    6.65
   0   0   2  111.46    6.54
   0   0   2  114.00    6.70
   0   0  -2  108.24    6.39
   1   0  -2    6.24    0.80
  -1   0   2    6.75    0.77
  -1   0  -2    6.57    0.82
   1   0   2    8.92    1.15
   1   0  -2    8.15    1.76
   1   0   2    8.34    2.06
  -1   0  -2    6.95    0.74
   2   0  -2  195.36    2.74
  -2   0  -2  203.66    2.90
   2   0   2  204.69    2.90
   2   0   2  202.14    3.30
  -2   0  -2  202.01    2.77
   3   0  -2   24.12    1.81
  -3   0  -2   24.84    1.76
   3   0   2   24.44    1.77
  -3   0   2   25.19    1.84
   4   0  -2  459.42    4.97
  -4   0  -2  466.20    5.73
   4   0   2  474.27    5.44
   4   0  -2  450.78    4.97
  -4   0   2  467.53    4.90
   5   0  -2  568.99    6.03
  -5   0  -2  589.90    6.60
   5   0   2  584.55    6.81
   5   0  -2  586.06    6.58
  -5   0   2  581.32    6.01
   6   0  -2   84.23    4.67
  -6   0  -2   85.52    4.70
   6   0   2   83.27    4.77
   6   0  -2   80.69    4.73
  -6   0   2   82.83    4.47
   7   0  -2 5695.94  321.55
  -7   0  -2 5358.21  302.46
   7   0   2 5223.28  294.96
   7   0  -2 5025.45  283.75
  -7   0   2 5076.76  286.51
   8   0  -2   21.72    6.02
  -8   0  -2   17.84    2.27
   8   0   2   22.80    6.16
   8   0  -2   16.40    2.60
  -8   0   2   23.58    5.09
   9   0  -2  181.33    6.16
  -9   0  -2  193.30    7.15
   9   0   2  187.60    6.70
   9   0  -2  185.29    7.15
  -9   0   2  196.20    6.51
  10   0  -2  752.43   16.17
 -10   0  -2  727.10   15.57
  10   0   2  720.35   16.10
  10   0  -2  724.67   15.78
 -10   0   2  738.79   16.06
  11   0  -2  516.43   17.16
 -11   0  -2  483.71   15.89
  11   0   2  471.59   18.14
  11   0  -2  491.14   17.61
 -11   0   2  560.22   18.68
  12   0  -2   17.32    6.72
 -12   0  -2   18.43    2.51
  12   0   2   17.68    3.90
  12   0  -2   14.80    2.81
 -12   0   2   18.76    4.64
  13   0  -2   59.63    7.10
 -13   0  -2   61.17    4.33
  13   0   2   62.98    7.83
  13   0  -2   52.75    5.77
 -13   0   2   58.83    8.18
  14   0  -2   46.28   11.58
 -14   0  -2   39.40    6.98
  14   0   2   46.66    5.85
  14   0  -2   44.87    4.91
 -14   0   2   44.07    6.56
  15   0  -2  192.00    8.34
 -15   0  -2  190.80    7.69
  15   0   2  190.71    9.00
  15   0  -2  200.39    9.42
 -15   0   2  186.52   10.71
  16   0  -2    6.14    2.95
 -16   0  -2    4.62    1.78
  16   0   2    7.07    3.49
  16   0  -2    6.48    2.73
 -16   0   2    4.55    2.01
  17   0  -2   75.94    7.80
 -17   0  -2   68.84    6.54
  17   0   2   69.92    6.58
  17   0  -2   77.92    9.49
 -17   0   2   72.25    7.68
 -18   0  -2    1.16    1.55
  18   0   2    3.73    2.83
  18   0  -2    2.23    3.73
 -18   0   2    1.92    1.79
  19   0  -2   25.54    9.60
 -19   0  -2   28.01    3.63
  19   0   2   32.75    5.62
  19   0  -2   30.87    5.09
  20   0  -2   39.78    8.42
 -20   0  -2   49.58    4.92
  20   0   2   54.71   10.69
  20   0  -2   39.14   14.32
 -20   0   2   38.71   10.12
  21   0  -2   56.28    7.45
 -21   0  -2   44.89    9.89
  21   0   2   62.02   21.52
  21   0  -2   62.77    8.44
 -22   0  -2   92.16    7.05
  22   0   2  108.16   11.61
  22   0  -2  116.68   11.78
  23   0   2   94.11    9.02
  23   0  -2   90.74    8.83
  24   0   2    2.73    3.58
  24   0  -2    0.03    2.78
   0   0  -3    0.16    0.77
   0   0   3    1.13    0.88
   0   0  -3    0.41    0.40
   1   0  -3  461.03    4.91
  -1   0  -3  441.30    4.75
   1   0   3  431.83    5.28
   2   0  -3  421.72    4.66
  -2   0  -3  426.43    4.82
   2   0   3  437.98    4.86
   3   0  -3    6.13    1.66
  -3   0  -3    6.66    1.31
   3   0   3    5.91    2.62
   4   0  -3 3735.03  210.82
  -4   0  -3 4035.20  227.77
   4   0   3 3748.11  211.62
  -4   0   3 3906.31  220.48
   5   0  -3  124.04    3.52
  -5   0  -3  124.65    3.38
   5   0   3  129.63    3.67
   5   0  -3  119.26    7.48
  -5   0   3  128.63    3.48
   6   0  -3   40.20    3.13
  -6   0  -3   37.98    2.87
   6   0   3   40.48    2.93
   6   0  -3   36.21    3.28
  -6   0   3   36.64    2.89
   7   0  -3  131.17    3.93
  -7   0  -3  135.03    4.38
   7   0   3  132.51    4.29
   7   0  -3  142.08    4.28
  -7   0   3  133.50    4.20
   8   0  -3 1389.57   25.70
  -8   0  -3 1400.70   25.85
   8   0   3 1389.91   26.01
   8   0  -3 1366.14   25.48
  -8   0   3 1413.36   25.87
   9   0  -3  991.68   19.57
  -9   0  -3  936.60   18.63
   9   0   3  944.43   19.12
   9   0  -3  873.81   17.72
  -9   0   3  931.82   18.86
  10   0  -3  536.01   17.37
 -10   0  -3  485.96   17.60
  10   0   3  509.20   17.17
  10   0  -3  490.37   16.11
 -10   0   3  555.65   18.51
  11   0  -3    5.46    2.87
 -11   0  -3    1.92    1.49
  11   0   3    5.41    1.98
  11   0  -3    8.01    2.41
 -11   0   3    7.48    2.60
  12   0  -3  565.36   16.41
 -12   0  -3  591.78   16.65
  12   0   3  613.19   17.67
  12   0  -3  570.82   16.30
 -12   0   3  582.74   16.30
  13   0  -3  317.58   12.08
 -13   0  -3  293.88    9.63
  13   0   3  307.11   11.56
  13   0  -3  308.23   11.12
 -13   0   3  295.01   13.79
  14   0  -3  670.76   26.94
 -14   0  -3  626.68   24.98
  14   0   3  632.71   28.83
  14   0  -3  639.50   26.28
 -14   0   3  649.10   28.43
  15   0  -3   17.38    6.61
 -15   0  -3   15.42    2.66
  15   0   3   12.88    3.64
  15   0  -3   13.93    3.19
 -15   0   3   20.85    5.24
  16   0  -3  303.66   16.38
 -16   0  -3  261.88   13.28
  16   0   3  266.61   13.47
  16   0  -3  287.24   13.87
 -16   0   3  273.03   14.09
  17   0  -3   13.43    4.14
 -17   0  -3   11.23    5.18
  17   0   3   13.38    5.51
  17   0  -3   14.95    4.33
 -17   0   3   15.17    4.53
  18   0   3  265.66   16.29
  18   0  -3  293.44   16.52
 -19   0  -3   95.90    6.45
  19   0   3   99.60    8.50
  19   0  -3   90.58   15.26
 -19   0   3   90.66   16.95
  20   0  -3   18.60    8.90
 -20   0  -3   19.98    3.77
  20   0   3   16.10    6.67
  20   0  -3   18.33    6.52
 -20   0   3   20.90    6.31
  21   0  -3    0.64    1.05
 -21   0  -3    0.72    1.93
  21   0   3    0.37    2.25
  21   0  -3    1.02    1.41
 -21   0   3    1.16    2.22
  22   0  -3  335.09   15.03
 -22   0  -3  356.68   39.18
  22   0   3  356.02   39.68
  22   0  -3  405.55   46.37
 -23   0  -3   15.10    3.68
  23   0   3   13.99    5.81
  23   0  -3   15.54    5.07
  24   0   3   34.96    8.60
  24   0  -3   41.59   10.53
   0   0  -4  994.60    7.84
   0   0   4  995.69    7.65
  -1   0  -4 1100.38    8.32
  -1   0   4 1051.00    7.74
   1   0   4 1082.22    7.91
  -2   0  -4 3468.39  195.85
   2   0   4 3436.67   14.63
   3   0  -4 3542.58  200.04
  -3   0  -4 3606.04  203.63
   3   0   4 3574.17  201.84
   4   0  -4   20.34    2.49
  -4   0  -4   20.19    1.99
   4   0   4   19.66    2.16
   5   0  -4 1076.91    9.17
  -5   0  -4 1091.23    9.39
   5   0   4 1096.84    9.72
  -5   0   4 1124.02   10.27
   6   0  -4    9.81    1.80
  -6   0  -4   10.20    2.65
   6   0   4    6.72    1.68
  -6   0   4    7.34    2.77
   7   0  -4    1.35    1.61
  -7   0  -4    0.80    1.61
   7   0   4    2.48    2.50
   7   0  -4    1.65    1.50
  -7   0   4    1.20    1.52
   8   0  -4  118.65    4.91
  -8   0  -4  112.41    4.34
   8   0   4  117.42    5.33
   8   0  -4  111.28    4.63
  -8   0   4  122.09    4.59
   9   0  -4  519.83   11.87
  -9   0  -4  521.42   11.78
   9   0   4  538.62   12.66
   9   0  -4  522.65   12.05
  -9   0   4  538.86   12.05
  10   0  -4   11.01    2.02
 -10   0  -4    9.13    3.03
  10   0   4    8.48    2.54
  10   0  -4   10.47    3.15
 -10   0   4    6.69    1.52
  11   0  -4    7.48    3.10
 -11   0  -4    2.12    1.43
  11   0  -4    2.85    1.15
 -11   0   4    4.63    1.80
  12   0  -4   60.82    6.83
 -12   0  -4   55.72    7.88
  12   0   4   52.99    4.18
  12   0  -4   66.00    5.27
 -12   0   4   64.29    8.57
  13   0  -4    8.60    3.06
 -13   0  -4    4.11    2.82
  13   0   4   10.60    3.49
  13   0  -4   10.75    3.71
 -13   0   4   10.36    2.79
  14   0  -4  730.13   19.42
 -14   0  -4  769.32   19.56
  14   0   4  750.79   21.95
  14   0  -4  780.56   22.39
 -14   0   4  729.57   20.56
  15   0  -4 1164.81   44.89
 -15   0  -4 1205.42   45.73
  15   0   4 1168.98   45.55
  15   0  -4 1271.29   48.87
 -15   0   4 1148.40   44.86
  16   0  -4  357.25   19.89
 -16   0  -4  370.47   20.21
  16   0   4  350.20   20.14
  16   0  -4  372.31   21.37
 -16   0   4  369.02   20.89
  17   0  -4   36.04   13.80
 -17   0  -4   40.43    4.34
  17   0   4   42.86    8.23
  17   0  -4   40.03    7.30
 -17   0   4   44.25   10.50
 -18   0  -4  229.31   13.65
  18   0   4  231.66   14.00
  18   0  -4  249.25   15.96
  19   0  -4   31.33   12.63
 -19   0  -4   38.79    4.55
  19   0   4   38.40   15.14
  19   0  -4   45.32    6.17
 -19   0   4   42.06   13.99
  20   0  -4   66.60    8.99
 -20   0  -4   75.34    6.97
  20   0   4   77.30    7.84
  20   0  -4   83.58   18.68
 -20   0   4   76.84    9.40
  21   0  -4  317.34   16.15
 -21   0  -4  321.29   17.28
  21   0   4  323.60   17.61
  21   0  -4  320.70   17.05
 -21   0   4  321.33   22.14
  22   0  -4    2.73    2.91
 -22   0  -4    5.64    3.05
  22   0   4    4.16    4.07
 -23   0  -4  155.48   12.65
  23   0   4  182.27   13.77
  23   0  -4  164.10   15.91
  24   0   4    5.70    3.53
  24   0  -4    7.07    3.77
   0   0  -5    0.77    1.02
   0   0   5   -0.02    0.52
   1   0  -5   71.37    4.20
  -1   0  -5   75.09    4.38
  -1   0   5   74.54    4.22
   1   0   5   73.61    4.17
   2   0  -5  981.69    8.68
  -2   0  -5 1038.96    9.08
   2   0   5 1019.75    8.95
   3   0  -5 1605.52   11.36
  -3   0  -5 1597.93   11.36
   3   0   5 1586.04   11.43
   4   0  -5   73.26    4.56
  -4   0  -5   68.51    4.07
   4   0   5   71.47    4.32
   5   0  -5  656.30   13.40
  -5   0  -5  635.54   12.99
   5   0   5  640.04   13.18
  -5   0   5  681.94   14.11
   6   0  -5  480.46   10.66
  -6   0  -5  475.58   10.50
   6   0   5  483.24   10.93
  -6   0   5  520.26   11.82
   7   0  -5  568.91   12.23
  -7   0  -5  599.95   13.47
   7   0   5  588.38   12.94
   7   0  -5  578.00   14.05
  -7   0   5  648.09   14.35
   8   0  -5   42.75    3.87
  -8   0  -5   45.24    3.91
   8   0   5   43.15    4.15
   8   0  -5   39.98    4.33
  -8   0   5   41.73    3.73
   9   0  -5   42.05    3.13
  -9   0  -5   48.27    3.20
   9   0   5   46.69    4.72
   9   0  -5   43.80    3.38
  -9   0   5   43.70    3.76
  10   0  -5    0.91    1.55
 -10   0  -5    0.36    1.40
  10   0   5    0.27    1.48
  10   0  -5    1.32    1.50
 -10   0   5    0.60    1.53
  11   0  -5  588.58   16.55
 -11   0  -5  642.00   17.22
  11   0   5  682.06   18.79
  11   0  -5  659.82   18.28
 -11   0   5  629.60   17.68
  12   0  -5  398.39   16.77
 -12   0  -5  434.92   18.02
  12   0   5  470.88   19.92
  12   0  -5  419.02   17.73
 -12   0   5  422.88   17.83
  13   0  -5   78.89    5.55
 -13   0  -5   72.69    5.03
  13   0   5   81.22    5.32
  13   0  -5   83.01    6.22
 -13   0   5   83.79   11.11
  14   0  -5   52.66   11.61
 -14   0  -5   43.81    4.17
  14   0   5   49.11   10.93
  14   0  -5   47.82    8.18
 -14   0   5   53.73    8.52
  15   0  -5   61.90    9.07
 -15   0  -5   57.57    4.64
  15   0   5   62.78    5.90
  15   0  -5   51.47    5.01
 -15   0   5   70.30    9.65
  16   0  -5   70.89    7.28
 -16   0  -5   73.45    9.54
  16   0   5   78.52    7.35
  16   0  -5   72.77    8.01
 -16   0   5   73.09    9.15
  17   0  -5    2.36    3.52
 -17   0  -5    0.04    0.94
  17   0   5    2.48    3.32
  17   0  -5    1.98    2.43
  18   0  -5    5.53    4.28
 -18   0  -5    9.04    2.84
  18   0   5    8.29    3.59
  18   0  -5   10.40    3.31
 -18   0   5    9.21    3.50
  19   0  -5   13.41    6.16
 -19   0  -5    7.85    2.28
  19   0   5   16.35    4.62
  19   0  -5    9.26    3.05
 -19   0   5   11.24    6.32
  20   0  -5   72.48   14.51
 -20   0  -5   77.20    8.06
  20   0   5   72.51    9.33
  20   0  -5   77.91   13.06
 -20   0   5   75.76   14.75
  21   0  -5   30.81   13.19
 -21   0  -5   27.12    8.71
  21   0   5   34.06   15.04
  21   0  -5   33.79   10.10
 -21   0   5   32.75    8.63
  22   0  -5    3.57    2.49
 -22   0  -5    3.79    2.27
  22   0   5    4.33    3.11
  22   0  -5    8.06    4.62
 -23   0  -5    2.58    2.29
  23   0   5    4.80    3.90
  23   0  -5    3.49    3.79
  24   0   5   16.57    5.36
  24   0  -5   11.54    5.48
   0   0  -6  728.37   14.48
   0   0   6  781.97   15.77
   1   0  -6   14.39    2.34
  -1   0  -6   11.45    1.94
  -1   0   6   15.75    3.93
   1   0   6   13.11    3.32
   2   0   6    0.99    1.57
   3   0  -6   35.55    3.54
  -3   0  -6   37.33    4.17
   3   0   6   35.97    3.34
   4   0  -6  621.86   13.06
  -4   0  -6  618.37   13.52
   4   0   6  619.63   13.07
   5   0  -6  770.93   15.66
  -5   0  -6  754.26   15.41
   5   0   6  783.87   16.01
   6   0  -6    1.15    1.74
  -6   0  -6    0.58    1.14
   6   0   6    0.37    1.23
  -6   0   6    1.89    1.88
   7   0  -6  347.65   11.96
  -7   0  -6  325.04   11.05
   7   0   6  341.01   11.77
  -7   0   6  333.42   11.58
   8   0  -6  650.11   20.36
  -8   0  -6  622.57   19.39
   8   0   6  643.89   20.35
   8   0  -6  617.74   19.63
  -8   0   6  637.93   20.05
   9   0  -6 1281.60   37.93
  -9   0  -6 1226.83   36.31
   9   0   6 1260.25   37.53
   9   0  -6 1236.26   36.63
  -9   0   6 1296.22   38.42
  10   0  -6 1171.41   29.11
 -10   0  -6 1175.56   14.11
  10   0   6 1208.37   14.94
  10   0  -6 1204.67   14.29
 -10   0   6 1131.94   28.12
  11   0  -6  392.38   16.57
 -11   0  -6  447.34   18.43
  11   0   6  467.75   19.53
  11   0  -6  466.69   19.62
 -11   0   6  460.35   18.92
  12   0  -6  151.38    8.98
 -12   0  -6  164.99    8.54
  12   0   6  149.90    8.32
  12   0  -6  145.82   10.46
 -12   0   6  149.41    7.91
  13   0  -6    1.00    2.17
 -13   0  -6    0.89    2.36
  13   0   6    3.58    3.55
  13   0  -6    3.91    3.84
 -13   0   6    1.56    1.89
  14   0  -6  356.09   16.21
 -14   0  -6  335.63   15.01
  14   0   6  317.23   14.83
  14   0  -6  301.49   14.15
 -14   0   6  295.00   14.55
  15   0  -6    1.56    1.95
 -15   0  -6    1.37    2.25
  15   0   6    1.89    1.80
  15   0  -6    1.85    2.19
 -15   0   6    1.67    2.01
  16   0  -6    0.75    2.18
 -16   0  -6    2.90    2.37
  16   0   6    2.36    2.97
  16   0  -6    3.96    3.10
 -16   0   6    2.41    2.51
  17   0  -6    1.03    2.69
 -17   0  -6   -0.60    1.45
  17   0   6    1.12    2.27
  17   0  -6    4.79    3.80
 -17   0   6    0.66    1.67
  18   0  -6   84.00   16.01
 -18   0  -6   84.32    6.85
  18   0   6   76.10    7.31
  18   0  -6   72.72   17.01
 -18   0   6   78.55   13.60
  19   0  -6   14.37    7.09
 -19   0  -6   16.03    3.44
  19   0   6   13.26    3.28
  19   0  -6   14.98    3.66
 -19   0   6   17.67    5.42
  20   0  -6  105.12   12.61
 -20   0  -6  119.15   11.38
  20   0   6  108.46   11.48
  20   0  -6  113.44   11.93
 -20   0   6  101.71   15.27
  21   0  -6    6.85    4.11
 -21   0  -6    5.99    3.13
  21   0   6    5.53    2.57
  21   0  -6    9.05    3.74
  22   0  -6    0.59    1.57
 -22   0  -6    0.80    2.24
  22   0   6    0.52    2.00
  22   0  -6    2.32    3.09
  23   0   6  278.80   31.00
  23   0  -6  288.22   12.17
   0   0  -7    1.54    1.48
   0   0   7    0.12    0.73
  -1   0  -7  918.23   18.16
  -1   0   7  957.76   19.00
   1   0   7 1069.86   21.07
   2   0  -7  161.93    5.53
  -2   0  -7  180.25    6.45
   2   0   7  187.02    5.88
   3   0  -7   21.55    2.57
  -3   0  -7   25.97    5.66
   3   0   7   21.63    7.60
   4   0  -7 1246.69   23.78
  -4   0  -7 1237.22   24.68
   4   0   7 1315.07   25.04
   5   0  -7  953.19   28.56
  -5   0  -7  920.88   27.59
   5   0   7  932.27   27.97
   6   0  -7    1.06    1.62
  -6   0  -7    1.13    1.32
   6   0   7    3.61    2.35
  -6   0   7    0.85    0.84
   7   0  -7 1088.26   32.52
  -7   0  -7 1033.77   30.85
   7   0   7 1053.19   31.63
  -7   0   7 1012.31   31.30
   8   0  -7  621.57   16.93
  -8   0  -7  612.70   16.50
   8   0   7  626.40   17.05
  -8   0   7  605.72   17.09
   9   0  -7   24.71    3.42
  -9   0  -7   26.29    2.92
   9   0   7   23.89    4.26
   9   0  -7   27.59    2.94
  -9   0   7   28.05    3.17
  10   0  -7  340.00   14.84
 -10   0  -7  344.32   14.77
  10   0   7  353.81   15.66
  10   0  -7  341.43   15.85
 -10   0   7  340.48   14.86
  11   0  -7  113.65    5.91
 -11   0  -7  106.98    5.79
  11   0   7  110.97    5.82
  11   0  -7  126.92    6.79
 -11   0   7  122.23    6.17
  12   0  -7   66.04    5.18
 -12   0  -7   66.48    7.21
  12   0   7   71.49    5.69
  12   0  -7   64.84    5.21
 -12   0   7   64.41    4.72
  13   0  -7  418.68   18.28
 -13   0  -7  438.77   18.67
  13   0   7  446.22   19.90
  13   0  -7  426.34   19.50
 -13   0   7  430.78   18.41
  14   0  -7  113.16    8.50
 -14   0  -7  113.39   11.10
  14   0   7  115.43    8.82
  14   0  -7  110.34    8.26
 -14   0   7  115.16    8.90
  15   0  -7    4.84    2.99
 -15   0  -7    4.43    2.09
  15   0   7    4.85    2.91
  15   0  -7    2.74    1.90
 -15   0   7    6.39    2.69
  16   0  -7    4.74    2.13
 -16   0  -7    3.00    2.57
  16   0   7    2.15    3.15
  16   0  -7    2.00    3.42
 -16   0   7    2.27    2.44
  17   0  -7  295.64   15.40
 -17   0  -7  308.90   13.27
  17   0   7  304.06   16.62
  17   0  -7  292.93   14.12
 -17   0   7  326.20   16.95
  18   0  -7   86.29    9.51
 -18   0  -7   96.91    8.35
  18   0   7   68.09   19.62
  18   0  -7   92.82    9.65
 -18   0   7   91.65   15.86
  19   0  -7   96.87   12.15
 -19   0  -7  100.50    9.83
  19   0   7   91.49   12.20
  19   0  -7  105.03   11.43
 -19   0   7   92.88   14.85
  20   0  -7   16.57    6.66
 -20   0  -7   18.12    7.73
  20   0   7   18.28    6.61
  20   0  -7   17.24    4.59
 -20   0   7   22.81    6.84
  21   0  -7   60.30    9.59
 -21   0  -7   59.27   13.93
  21   0   7   60.50   18.18
  21   0  -7   78.52    9.47
 -21   0   7   66.20   13.18
 -22   0  -7   13.62    7.39
  22   0   7   19.15    8.90
  22   0  -7   20.65    7.46
  23   0   7   19.64   15.54
  23   0  -7   20.17   12.89
   0   0  -8   15.42    2.68
   0   0   8   19.02    6.08
   1   0  -8  800.09   24.55
  -1   0  -8  705.52   21.72
  -1   0   8  672.23   21.16
   1   0   8  675.97   21.68
   2   0  -8  552.45   17.60
  -2   0  -8  633.31   19.89
   2   0   8  631.71   20.23
   3   0  -8   51.73    3.86
  -3   0  -8   57.92    3.68
   3   0   8   51.43    6.25
   4   0  -8  143.94    6.65
  -4   0  -8  141.01    6.24
   4   0   8  153.42    6.70
   5   0  -8   20.66    2.68
  -5   0  -8   19.56    4.11
   5   0   8   18.73    4.82
   6   0  -8  688.32   18.38
  -6   0  -8  744.74   19.52
   6   0   8  749.37   19.62
  -6   0   8  708.53   18.97
   7   0  -8    2.81    2.24
  -7   0  -8    1.38    1.52
   7   0   8    1.24    1.41
  -7   0   8    2.10    2.79
   8   0  -8  217.02   10.34
  -8   0  -8  220.11   10.17
   8   0   8  225.05   10.61
  -8   0   8  222.43   10.49
   9   0  -8   47.81    8.43
  -9   0  -8   43.43    3.62
   9   0   8   44.37    3.66
   9   0  -8   48.05    5.45
  -9   0   8   44.83    4.14
  10   0  -8    3.43    2.54
 -10   0  -8    2.07    2.37
  10   0   8    4.06    2.93
  10   0  -8    5.19    2.46
 -10   0   8    5.34    3.33
  11   0  -8  245.60    9.37
 -11   0  -8  273.20   13.10
  11   0   8  259.22   10.71
  11   0  -8  261.98   10.51
 -11   0   8  272.19   10.62
  12   0  -8   54.60    4.77
 -12   0  -8   40.74    3.96
  12   0   8   54.56    5.33
  12   0  -8   55.26    5.09
 -12   0   8   52.02    4.83
  13   0  -8  234.57   14.36
  13   0   8  224.16   13.66
 -13   0   8  233.64   14.01
  14   0  -8  140.15    8.56
 -14   0  -8  146.97    8.44
  14   0   8  151.59    9.51
  14   0  -8  145.80   11.14
  15   0  -8   26.16   10.27
 -15   0  -8   29.22    4.45
  15   0   8   26.40    7.82
  15   0  -8   30.75    8.34
 -15   0   8   25.93    9.52
  16   0  -8 1039.74   19.63
 -16   0  -8 1044.06   16.80
  16   0   8  971.10   33.58
  16   0  -8 1005.91   34.76
 -16   0   8 1043.67   18.96
  17   0  -8  264.27   14.73
 -17   0  -8  241.85   12.48
  17   0   8  250.56   13.96
 -17   0   8  287.32   16.79
  18   0  -8    0.35    2.03
 -18   0  -8    2.53    2.41
  18   0   8    1.39    2.43
  18   0  -8    2.84    4.43
 -18   0   8    4.70    2.52
  19   0  -8    1.48    1.92
 -19   0  -8    1.51    1.72
  19   0   8    2.07    2.56
  19   0  -8    6.13    5.29
 -19   0   8    0.50    1.11
  20   0  -8   20.69    9.88
 -20   0  -8   27.26    4.54
  20   0   8   23.13   11.08
  20   0  -8   24.21    5.22
 -20   0   8   22.69   11.00
  21   0   8   23.01    5.53
  21   0  -8   21.09    4.85
 -21   0   8   18.73    8.77
 -22   0  -8   32.03    5.63
  22   0   8   21.48   14.60
  22   0  -8   32.59   10.17
   0   0  -9    0.72    1.31
   0   0   9    0.64    1.09
   1   0  -9    7.67    3.53
  -1   0  -9    9.55    3.47
   1   0   9    6.13    1.89
   2   0  -9    3.56    2.44
  -2   0  -9    2.11    1.51
   2   0   9    1.38    2.30
   3   0  -9  363.25   11.32
  -3   0  -9  340.81   11.21
   3   0   9  317.21   10.92
   4   0  -9  111.81    6.17
  -4   0  -9  110.05    5.72
   4   0   9  109.76    6.38
   6   0  -9   21.94    3.66
  -6   0  -9   13.61    2.90
   6   0   9   14.69    5.17
   7   0  -9   29.34    3.98
  -7   0  -9   30.15    6.15
   7   0   9   21.79    5.36
  -7   0   9   23.77    3.31
   8   0  -9  623.74   16.62
  -8   0  -9  618.34   16.29
   8   0   9  635.49   16.84
  -8   0   9  616.45   16.66
   9   0  -9   98.03    6.52
  -9   0  -9   95.50    7.99
   9   0   9   96.39    5.83
  -9   0   9   93.67    5.86
  10   0  -9   29.90    4.62
 -10   0  -9   26.20    3.19
  10   0   9   29.37    4.22
  10   0  -9   31.84    3.66
 -10   0   9   31.84    5.91
  11   0  -9  263.98   15.59
 -11   0  -9  266.58   17.88
  11   0   9  273.19   15.85
  11   0  -9  265.74   15.23
 -11   0   9  274.71   15.83
  12   0  -9   34.82    4.69
 -12   0  -9   27.27    3.09
  12   0   9   35.93    4.91
  12   0  -9   34.90    4.78
 -12   0   9   29.93    7.36
  13   0  -9    0.94    1.80
 -13   0  -9    1.78    2.48
  13   0   9    0.24    1.82
  13   0  -9    1.14    1.98
 -13   0   9   -0.03    1.70
  14   0  -9   16.13    4.18
 -14   0  -9   13.18    2.85
  14   0   9   11.64    7.14
  14   0  -9   16.80    8.18
 -14   0   9   18.50    4.17
  15   0  -9  166.23    9.96
 -15   0  -9  169.70    9.27
  15   0   9  158.45   10.21
  15   0  -9  156.09   12.81
 -15   0   9  178.37   10.35
  16   0  -9   17.78   10.92
 -16   0  -9   15.47    6.86
  16   0   9   15.80    7.35
  16   0  -9   18.80    3.71
 -16   0   9   17.58    8.02
  17   0  -9   88.56   23.28
 -17   0  -9   95.29    9.41
  17   0   9   97.24   10.01
  17   0  -9   98.85   11.02
 -17   0   9   96.45   17.10
  18   0  -9    1.22    2.63
 -18   0  -9    1.91    2.60
  18   0   9    2.17    2.05
  18   0  -9    3.91    3.75
 -18   0   9    5.21    3.51
 -19   0  -9   33.80    5.16
  19   0   9   20.00   12.93
  19   0  -9   29.80    5.93
 -19   0   9   29.80   12.52
  20   0  -9    1.76    1.57
 -20   0  -9    0.69    1.72
  20   0   9    0.53    2.26
  20   0  -9    2.27    3.62
 -20   0   9    1.06    2.70
  21   0  -9    0.85    2.33
 -21   0  -9    1.40    2.88
  21   0   9    2.33    4.05
  21   0  -9    3.70    3.60
 -21   0   9    3.53    2.66
   0   0 -10  103.13    9.30
   0   0  10   87.47    5.55
   1   0 -10  264.93   12.34
  -1   0 -10  258.12   12.59
   1   0  10  301.47   13.53
   2   0 -10    0.60    1.52
  -2   0 -10    1.63    2.40
   2   0  10    0.39    0.67
   3   0 -10   90.65   11.00
  -3   0 -10   97.08   10.16
   3   0  10   84.87    9.99
   4   0 -10  107.35    6.13
  -4   0 -10  121.46    6.29
   4   0  10  108.29    5.95
   5   0 -10   40.02    5.27
  -5   0 -10   45.38    4.62
   5   0  10   40.28    7.99
   6   0 -10  252.94    9.74
  -6   0 -10  251.08    8.96
   6   0  10  281.18   10.60
   7   0 -10   10.13    3.02
  -7   0 -10    6.78    2.22
   7   0  10    9.86    3.51
  -7   0  10   14.05    3.80
   8   0 -10  614.99   25.44
  -8   0 -10  625.92   27.32
   8   0  10  690.47   27.76
  -8   0  10  665.42   27.11
   9   0  10 1623.89   20.89
  -9   0  10 1619.39   19.48
  10   0 -10   49.13    7.75
 -10   0 -10   55.41    8.86
  10   0  10   51.17    9.96
  10   0 -10   54.62   12.61
 -10   0  10   57.52   11.48
  11   0 -10   31.65    5.03
 -11   0 -10   30.63    6.66
  11   0  10   30.02    4.59
  11   0 -10   31.63    3.79
 -11   0  10   24.43    7.54
  12   0 -10  100.36    8.35
 -12   0 -10   95.64    6.89
  12   0  10   97.31    7.91
  12   0 -10  100.73   13.21
 -12   0  10  107.47    8.55
  13   0 -10    2.57    1.98
 -13   0 -10    2.78    3.18
  13   0  10    1.50    2.41
  13   0 -10    1.20    2.05
 -13   0  10    4.03    2.99
  14   0 -10   20.16   11.90
 -14   0 -10   22.16    9.03
  14   0  10   19.47    4.22
  14   0 -10   25.28    5.27
 -14   0  10   24.08    4.32
  15   0 -10  255.26   17.28
 -15   0 -10  236.58   20.58
  15   0  10  234.07   15.94
  15   0 -10  236.16   16.19
 -15   0  10  248.48   17.54
  16   0 -10    1.81    2.88
 -16   0 -10    0.70    2.61
  16   0  10    4.53    3.51
  16   0 -10    3.48    3.17
 -16   0  10    2.41    3.62
  17   0 -10  160.59   11.39
 -17   0 -10  178.95   10.94
  17   0  10  166.19   11.08
  17   0 -10  168.28   11.12
 -17   0  10  177.89   15.20
 -18   0 -10   12.99    3.65
  18   0  10    9.71    2.93
  18   0 -10   13.81    4.60
 -18   0  10   18.92    6.93
  19   0 -10    2.32    3.18
 -19   0 -10    3.49    1.89
  19   0  10    5.52    3.30
  19   0 -10    3.97    3.77
 -19   0  10    5.50    4.22
 -20   0 -10   72.42    9.56
  20   0  10   50.78   19.96
  20   0 -10   57.70    9.81
   0   0 -11    2.80    2.68
   0   0  11    1.13    1.66
   1   0 -11   64.74    5.21
  -1   0 -11   59.94    9.61
   1   0  11   51.28    9.43
   2   0 -11 1042.95   15.06
  -2   0 -11  989.07   24.07
   2   0  11 1106.73   17.78
   3   0 -11   38.12    8.84
  -3   0 -11   30.20    3.98
   3   0  11   35.19    6.65
   4   0 -11   10.31    3.26
   4   0  11   10.74    4.69
   5   0 -11  151.03   16.65
  -5   0 -11  202.90   10.46
   5   0  11  171.96   14.36
   6   0 -11  186.66   10.26
  -6   0 -11  194.58    9.97
   6   0  11  181.56    9.55
   7   0 -11   72.69    6.00
  -7   0 -11   74.12   11.94
   7   0  11   68.65    6.83
  -7   0  11   76.65    6.98
   8   0 -11  127.41    8.66
  -8   0 -11  126.69    7.56
   8   0  11  132.56    9.33
  -8   0  11  135.53    8.39
   9   0 -11   19.63    4.45
  -9   0 -11   19.44    3.67
   9   0  11   18.55    5.42
  -9   0  11   23.48    5.37
  10   0 -11  235.38   14.03
 -10   0 -11  250.59   13.85
  10   0  11  268.65   18.29
 -10   0  11  261.42   15.78
  11   0 -11   39.87    5.71
 -11   0 -11   35.50    4.37
  11   0  11   34.84   12.58
  11   0 -11   44.11   11.39
 -11   0  11   37.72    7.39
  12   0 -11   96.17    7.79
 -12   0 -11   91.05    6.35
  12   0  11   92.14    7.37
  12   0 -11   94.37    9.99
 -12   0  11  100.38    7.32
 -13   0 -11  149.79   13.85
  13   0 -11  156.86    9.68
 -13   0  11  150.49    9.89
  14   0 -11    8.90    3.41
  14   0  11    7.21    3.13
  14   0 -11    4.71    2.46
 -14   0  11    9.94    3.55
  15   0 -11   16.41    9.82
 -15   0 -11   21.66    8.52
  15   0  11   17.28    3.88
  15   0 -11   26.16    4.75
 -15   0  11   22.72    7.96
  16   0 -11  191.70   17.36
 -16   0 -11  222.36   12.66
  16   0  11  206.54   12.53
  16   0 -11  212.90   12.70
 -16   0  11  215.63   13.14
  17   0 -11    1.07    2.97
  17   0  11    0.36    1.26
 -17   0  11    1.04    3.60
  18   0 -11   43.30   13.28
 -18   0 -11   67.05    6.85
  18   0 -11   73.89    8.73
 -18   0  11   52.12    9.98
  19   0 -11    0.18    1.71
 -19   0 -11    0.39    1.90
  19   0  11    0.05    2.26
  19   0 -11    2.54    2.45
 -19   0  11    1.45    1.95
   0   0 -12   74.12   13.72
   1   0 -12  763.70   39.56
  -1   0 -12  771.61   41.57
   1   0  12  789.21   40.62
   2   0 -12  126.30   13.76
  -2   0 -12  114.30    9.03
   2   0  12  130.65   12.29
   3   0 -12  122.57   17.41
  -3   0 -12  114.64   17.97
   3   0  12  117.67    9.34
   4   0 -12  125.53   15.71
  -4   0 -12  122.77    8.66
   5   0 -12  216.57   11.57
  -5   0 -12  221.98   11.14
   6   0 -12   14.47    8.14
  -6   0 -12   18.35    6.27
   6   0  12   16.62    5.14
   7   0 -12   18.98    4.27
  -7   0 -12   23.25    6.94
   7   0  12   21.99    6.90
  -7   0  12   22.42    4.40
   8   0 -12   38.46    5.54
  -8   0 -12   35.16    4.63
   8   0  12   33.93    9.04
  -8   0  12   37.88    5.30
   9   0 -12    7.20    3.44
  -9   0 -12    5.00    2.90
   9   0  12    5.68    3.43
  -9   0  12    4.14    3.53
  10   0 -12    1.61    2.75
 -10   0 -12    3.44    2.90
  10   0  12    2.29    2.65
 -10   0  12    3.59    3.35
  11   0 -12    6.23    4.21
 -11   0 -12    2.83    2.20
  11   0  12    1.60    2.33
  11   0 -12    2.71    2.29
 -11   0  12    1.26    3.34
  12   0 -12   53.36   10.37
 -12   0 -12   59.90    6.19
  12   0  12   50.32   13.51
  12   0 -12   55.82    5.58
 -12   0  12   56.42   14.52
  13   0 -12   82.38    9.21
 -13   0 -12   82.31   14.56
  13   0  12   61.88   18.72
  13   0 -12   83.07    9.04
 -13   0  12   78.07   14.85
  14   0 -12    2.51    2.58
 -14   0 -12    0.34    1.99
  14   0  12    1.67    1.20
  14   0 -12    1.00    2.01
 -14   0  12    2.75    2.89
  15   0 -12   63.75    6.10
 -15   0 -12   62.10   10.14
 -15   0  12   75.13    6.86
  16   0 -12   65.74    8.69
 -16   0 -12   59.71    7.01
  16   0  12   60.39    7.29
  16   0 -12   62.12    8.95
 -16   0  12   67.00    8.12
  17   0 -12    2.70    2.96
 -17   0 -12    2.54    2.82
  17   0  12    3.29    3.31
  17   0 -12    3.04    2.48
 -17   0  12    6.93    3.98
  18   0 -12    9.36    4.07
 -18   0 -12    9.20    7.23
  18   0  12    8.48    3.28
  18   0 -12   12.59    4.71
 -18   0  12    6.48    6.57
   0   0 -13    1.35    2.56
   1   0 -13    1.89    2.51
  -1   0 -13    2.40    2.73
   1   0  13    2.76    2.61
   2   0 -13    4.85    2.84
  -2   0 -13    2.50    2.63
   2   0  13    2.04    1.74
   3   0 -13    4.23    2.50
  -3   0 -13    3.28    3.14
   3   0  13    2.46    2.51
   4   0 -13   10.41    3.76
  -4   0 -13   10.36    4.00
   4   0  13   11.16    4.12
   5   0 -13  194.24   12.30
  -5   0 -13  173.81   12.32
   5   0  13  184.05   12.25
   6   0 -13   11.13    3.33
  -6   0 -13   12.71    2.93
   6   0  13   15.90    6.35
  -6   0  13   22.26    4.58
   7   0 -13   30.07    5.15
  -7   0 -13   28.24    4.23
   7   0  13   27.40   10.59
  -7   0  13   32.22    4.98
   8   0 -13    4.20    2.46
  -8   0 -13    3.69    2.15
   8   0  13    1.86    1.58
  -8   0  13    4.47    3.02
   9   0 -13  104.59    9.90
  -9   0 -13  100.53   15.83
   9   0  13   83.86   17.44
  -9   0  13  109.99    9.63
  10   0 -13    9.80    3.88
 -10   0 -13    6.52    3.40
  10   0  13    4.40    2.24
 -10   0  13   10.80    4.98
  11   0 -13   25.09    5.51
 -11   0 -13   23.40    4.32
  11   0  13   21.62   10.34
  11   0 -13   28.52    4.98
 -11   0  13   24.34    8.78
  12   0 -13   42.71    6.14
 -12   0 -13   39.03    5.81
  12   0  13   27.79    7.99
  12   0 -13   36.80   11.27
 -12   0  13   46.15    6.34
  13   0 -13  193.70   11.14
 -13   0 -13  190.80   13.00
  13   0  13  132.69    8.47
  13   0 -13  189.89   15.66
 -13   0  13  211.08   11.98
 -14   0 -13   27.14    4.55
  14   0  13   26.41   11.38
  14   0 -13   34.94    6.24
 -14   0  13   36.83    5.84
  15   0 -13   24.62    6.24
 -15   0 -13   16.40    3.79
  15   0  13   18.62   10.49
  15   0 -13   21.81    5.36
 -15   0  13   31.27    6.08
  16   0 -13   59.80    9.30
 -16   0 -13   61.87    9.14
  16   0  13   41.44   12.94
  16   0 -13   57.23   11.04
 -16   0  13   72.18   10.44
 -17   0 -13   10.71    3.59
  17   0  13    9.81    6.02
  17   0 -13    5.02    4.11
 -17   0  13    5.99    6.59
   0   0 -14    6.15    2.73
   1   0 -14   15.25    6.75
  -1   0 -14   16.21    4.38
   2   0 -14   26.35   10.20
  -2   0 -14   28.60    7.29
   2   0  14   20.27   11.04
   3   0 -14   26.41    5.03
  -3   0 -14   30.53    7.32
   3   0  14   22.55    7.89
   4   0 -14    5.45    3.86
  -4   0 -14    3.57    2.33
   4   0  14    5.11    3.67
   5   0 -14    0.92    2.80
   5   0  14    1.31    1.98
   6   0 -14  707.14   41.07
  -6   0 -14  718.73   14.39
   6   0  14  660.46   39.24
  -6   0  14  741.33   16.00
  -7   0 -14   44.04    6.04
   7   0  14   40.88   10.88
  -7   0  14   53.52    6.49
   8   0 -14   18.88    4.60
  -8   0 -14   18.18    3.61
   8   0  14   16.32    7.20
  -8   0  14   21.91    5.23
   9   0 -14    5.21    3.08
  -9   0 -14    4.39    2.55
   9   0  14    3.17    2.66
  -9   0  14    2.62    3.24
  10   0 -14   25.89    5.57
 -10   0 -14   22.43    6.20
  10   0  14   14.65    7.66
 -10   0  14   21.82   10.61
  11   0 -14    2.59    2.44
  11   0  14    3.20    2.97
  11   0 -14    2.61    2.21
 -11   0  14    5.98    3.58
  12   0 -14  385.99   25.36
 -12   0 -14  438.82   13.26
  12   0  14  311.31   20.77
  12   0 -14  402.65   11.15
 -12   0  14  419.00   12.89
  13   0 -14    5.53    4.05
 -13   0 -14    1.80    2.48
  13   0  14    2.62    3.82
  13   0 -14    1.99    2.22
 -13   0  14    3.79    3.68
  14   0 -14  138.78   17.14
 -14   0 -14  144.32   17.21
  14   0  14  113.93   13.73
 -14   0  14  147.98   17.69
  15   0 -14    4.02    3.23
 -15   0 -14    0.52    1.60
  15   0  14    2.38    2.68
  15   0 -14    3.36    3.25
 -15   0  14    4.80    4.19
   0   0 -15    1.30    1.48
   1   0 -15   20.03    7.80
  -1   0 -15   12.40    3.51
   2   0 -15   22.07    5.54
  -2   0 -15   17.09    4.49
   3   0 -15    3.95    3.28
  -3   0 -15    2.93    3.46
   3   0  15    4.63    2.68
   4   0 -15   90.38   10.05
  -4   0 -15   98.93   16.84
   4   0  15   79.61    9.47
   5   0 -15   26.73    5.37
  -5   0 -15   24.61    5.05
   5   0  15   19.55    9.80
   6   0 -15   59.32    7.36
  -6   0 -15   47.10   12.51
   6   0  15   41.62   10.90
  -6   0  15   47.36   15.80
   7   0 -15    8.59    3.52
  -7   0 -15    5.34    2.51
   7   0  15    5.83    3.07
  -7   0  15    6.22    3.72
   8   0 -15   51.64    6.68
  -8   0  15   49.24   18.52
   9   0 -15    8.57    3.77
  -9   0 -15    8.00    3.41
   9   0  15    7.02    3.73
  -9   0  15    7.75    3.90
  10   0 -15   20.66    4.88
 -10   0 -15   16.06    4.84
  10   0  15   10.66    6.81
 -10   0  15   25.60    5.64
  11   0 -15    8.41    4.65
 -11   0 -15    5.41    3.03
  11   0  15    5.57    5.17
  11   0 -15    3.84    2.15
 -11   0  15    6.98    5.02
 -12   0 -15   57.56   12.49
  12   0  15   44.78   12.75
  12   0 -15   67.13    9.84
  13   0 -15   47.82    8.93
 -13   0 -15   35.70    5.95
  13   0  15   25.87   15.01
  13   0 -15   31.19   14.94
 -13   0  15   43.07   11.42
   1   0 -16  196.77   11.69
  -1   0 -16  171.39   16.88
   2   0 -16    5.07    4.18
  -2   0 -16    0.85    2.08
   3   0 -16  113.04   10.72
  -3   0 -16   88.60    7.92
   4   0 -16   27.96    8.15
  -4   0 -16   25.12    5.17
   4   0  16   13.44   10.53
   5   0 -16   63.76    8.14
  -5   0 -16   71.05    8.30
   5   0  16   50.05   15.17
  -5   0  16   74.08    8.71
   6   0 -16   30.92    6.68
  -6   0 -16   28.31    5.22
   6   0  16   34.50    7.60
  -6   0  16   31.02    9.60
   7   0 -16   33.57    5.82
  -7   0 -16   30.55    5.19
   7   0  16   23.27   10.82
  -7   0  16   30.62   14.39
   8   0 -16    3.86    3.44
  -8   0 -16    0.98    2.36
   8   0  16    1.23    1.78
  -8   0  16    2.63    2.92
  -9   0 -16    1.39    2.38
  10   0 -16   11.22    4.62
 -10   0 -16    7.72    4.56
  10   0 -16    8.72    3.96
 -10   0  16   10.15    4.77
   0   0 -17    1.90    2.90
   1   0 -17    5.44    4.18
  -1   0 -17    3.04    2.81
   2   0 -17  103.32   13.48
  -2   0 -17   90.54   15.05
   3   0 -17    3.53    3.46
  -3   0 -17    1.43    2.93
   4   0 -17   10.25    4.61
  -4   0 -17    2.12    1.99
   5   0 -17   41.93    7.54
  -5   0 -17   41.46    7.85
  -5   0  17   36.11   19.69
   6   0 -17   39.83    7.52
  -6   0 -17   31.77    6.55
  -6   0  17   36.88    7.38
   7   0 -17   12.28    4.39
  -7   0 -17   10.55    7.46
  -7   0  17   11.36    6.22
   0   1   0    0.36    0.55
   0  -1   0    0.40    0.50
   0   1   0    0.10    0.33
   0  -1   0    0.23    0.31
   0   1   0    0.13    0.28
   0  -1   0    0.40    0.47
   1   1   0    1.19    0.91
  -1   1   0    0.31    0.25
  -1  -1   0    0.33    0.62
   1  -1   0    0.49    0.37
   1   1   0    0.37    0.64
  -1  -1   0    0.08    0.27
   1   1   0    0.21    0.39
  -1   1   0    0.42    0.55
   1  -1   0    0.14    0.29
  -1  -1   0    0.74    0.31
   2   1   0   17.71    1.99
  -2  -1   0   15.97    1.67
   2   1   0   14.87    1.17
  -2  -1   0   13.86    1.06
  -2   1   0   18.17    2.37
   2  -1   0   16.44    1.37
  -2  -1   0   16.84    0.94
   3   1   0    0.99    1.54
   3   1   0    0.51    0.50
   3  -1   0    0.51    0.73
  -3   1   0    1.10    1.15
   4   1   0  195.18    4.98
  -4   1   0  186.03    2.35
  -4   1   0  187.69    1.97
   4   1   0  174.97    3.92
   4  -1   0  190.84    3.40
  -4   1   0  180.72    5.15
   5   1   0    2.48    1.87
  -5   1   0    1.13    0.66
   5   1   0    0.76    1.89
   5  -1   0    1.43    1.51
  -5   1   0    0.61    1.30
   5   1   0    0.96    0.54
  -6   1   0  189.98    3.79
   6   1   0  195.44    5.07
   6  -1   0  196.82    4.29
  -6   1   0  181.94    7.58
   6   1   0  177.45    2.42
   7   1   0    1.55    1.55
   7   1   0    1.50    1.57
   7  -1   0    1.22    1.21
  -7   1   0    0.27    0.90
   7   1   0    0.53    0.54
   8   1   0  328.08    7.95
   8   1   0  329.38    8.04
   8  -1   0  340.93    7.66
  -8   1   0  321.39    9.21
   9   1   0    1.26    1.74
   9   1   0    0.85    1.43
   9  -1   0    0.43    1.50
  -9   1   0    0.47    1.14
  10   1   0  471.85   12.05
  10   1   0  414.63   14.87
  10  -1   0  465.96   11.54
 -10   1   0  475.53   12.94
  11   1   0    0.52    0.80
  11   1   0    0.59    1.87
 -11   1   0    0.58    1.12
  12   1   0    1.07    1.21
  12   1   0   -0.51    1.81
  12  -1   0    2.82    2.63
 -12   1   0    2.56    2.44
  13   1   0    1.35    1.80
 -13   1   0    0.65    0.98
  13   1   0    2.42    2.11
  13  -1   0    1.27    2.34
 -13   1   0   -0.08    1.25
  14   1   0   36.55    8.88
 -14   1   0   35.87    3.68
  14   1   0   38.12   11.75
  14  -1   0   37.63    3.70
 -14   1   0   38.77    9.59
  15   1   0    0.69    1.51
 -15   1   0    0.51    1.02
  15   1   0    1.00    2.04
  15  -1   0    2.37    2.73
 -15   1   0    0.58    1.47
  16   1   0  155.20   11.18
 -16   1   0  167.30    8.23
  16   1   0  171.98   21.89
  16  -1   0  185.08   17.38
  17   1   0    1.24    1.80
 -17   1   0    0.04    0.97
  17   1   0    0.77    1.59
  17  -1   0    1.04    2.89
  18   1   0  465.97   20.68
 -18   1   0  373.60   15.39
  18   1   0  479.55   21.08
  18  -1   0  476.47   21.32
 -19   1   0    1.39    1.77
  19   1   0    1.92    3.14
  19  -1   0    1.81    2.85
 -20   1   0   22.64    3.10
 -20  -1   0   23.00    9.75
  20   1   0   22.16   10.03
  20  -1   0   23.61    4.13
 -21  -1   0    0.74    1.10
  21   1   0    1.91    2.36
  21  -1   0    0.67    2.15
 -22  -1   0    6.80    3.74
  22   1   0    6.74    5.32
  22  -1   0    4.63    3.46
 -23  -1   0    1.07    2.36
  23   1   0    0.65    2.29
  23  -1   0    2.44    3.50
 -24  -1   0    5.02    2.68
  24   1   0    3.33    3.11
  24  -1   0    4.25    3.84
   0   1  -1  609.08    4.21
   0  -1  -1  586.25    4.10
   0   1   1  590.54    4.23
   0   1   1  588.72    4.54
   0  -1  -1  588.85    4.99
   0   1   1  606.32    4.25
   0  -1  -1  599.19    4.02
  -1  -1  -1   81.84    4.15
   1   1  -1   88.06    4.24
  -1  -1   1   93.15    4.33
  -1   1  -1   94.85    4.25
   1  -1   1   93.62    4.16
   1  -1  -1   90.93    4.22
  -1   1   1   90.92    4.06
  -1  -1  -1   99.33    6.06
   1  -1  -1   98.39    6.27
   1   1   1   99.27    6.12
  -1  -1  -1   91.63    4.30
   1   1  -1   91.21    4.03
  -1  -1   1   86.32    3.76
   1  -1   1   89.59    3.88
  -1   1   1   95.83    4.51
   1  -1  -1   97.15    4.51
   1   1   1   95.85    4.30
  -1  -1  -1   92.57    4.10
   2   1  -1  475.52    5.07
  -2   1  -1  482.12    2.98
   2  -1   1  495.00    2.94
   2  -1  -1  498.26    2.41
  -2   1   1  476.21    2.51
   2   1   1  485.07    4.68
   2   1  -1  478.16    3.79
  -2   1  -1  501.16    3.41
  -2   1   1  484.62    4.98
   3   1   1   11.00    2.97
   3   1  -1    9.47    2.57
  -3   1   1    8.26    0.67
  -3   1  -1    8.84    0.88
   3  -1   1   10.92    1.41
   3   1   1    9.12    1.24
   3   1  -1    9.15    1.28
  -3  -1   1    7.49    0.94
   3  -1   1   10.24    1.14
  -3   1  -1    9.98    0.95
  -3   1   1   13.43    2.82
   4   1   1   11.57    3.60
   4   1  -1   10.44    2.83
   4  -1  -1   10.60    0.91
  -4   1   1    8.39    0.74
  -4   1  -1    9.85    0.96
   4  -1   1    9.30    0.89
   4   1   1    9.67    1.66
   4   1  -1   11.10    2.10
   4  -1   1   13.69    2.83
  -4   1   1   15.44    4.70
  -4  -1   1   11.90    1.70
   5  -1  -1  222.12    3.36
  -5   1  -1  215.68    2.87
   5  -1   1  227.31    3.36
   5   1   1  226.67    4.81
   5   1  -1  210.66    4.56
   5  -1   1  221.83    4.59
   5  -1  -1  231.24    4.34
  -5   1  -1  203.38    4.42
  -5   1   1  216.01    5.55
  -5  -1   1  214.69    2.56
  -6   1  -1 1933.49    9.39
   6   1   1 1966.29   14.09
   6   1   1 1975.81   13.18
  -6   1   1 1926.09   13.59
   7   1   1  181.71    6.04
   7  -1  -1  188.53    3.91
   7   1  -1  191.05    5.72
  -7   1  -1  184.38    3.39
   7   1   1  185.22    6.52
   7   1  -1  181.29    5.26
   7  -1   1  179.60    4.60
   7  -1  -1  197.93    4.90
  -7   1  -1  168.03    6.66
  -7   1   1  195.00    6.87
  -7  -1   1  179.78    3.85
   7   1  -1  174.69    2.70
   8   1   1   13.39    2.76
   8  -1  -1   15.02    3.72
   8   1  -1   14.96    5.16
  -8   1  -1   13.88    2.26
   8   1   1   13.87    3.42
   8   1  -1   17.83    6.27
   8  -1   1   14.95    2.32
   8  -1  -1   16.03    5.41
  -8   1  -1   13.50    4.11
  -8   1   1   16.71    4.12
  -8  -1   1   16.43    3.00
   9   1   1  367.34    9.94
   9  -1  -1  370.21    8.36
   9   1  -1  389.29   10.45
  -9   1  -1  380.71    8.44
   9   1   1  374.21   10.13
   9   1  -1  353.93   10.33
   9  -1   1  385.25    9.72
   9  -1  -1  371.15    9.37
  -9   1  -1  348.45   11.44
  -9  -1   1  343.99    9.25
  -9   1   1  376.35   10.50
  10   1   1   80.60    6.60
  10  -1  -1   83.30    6.13
  10   1  -1   86.67    9.62
 -10   1  -1   81.78    5.56
  10   1   1   83.93    5.02
  10   1  -1   78.41    6.28
  10  -1   1   86.27    4.46
  10  -1  -1   86.65    4.41
 -10  -1   1   78.01    7.20
 -10   1   1   90.80    7.52
  11   1   1   69.41    7.61
  11  -1  -1   69.30    6.68
  11   1  -1   81.40    5.81
 -11   1  -1   63.13    3.10
  11   1   1   69.07    5.57
  11   1  -1   73.51    8.29
  11  -1   1   72.49    4.73
  11  -1  -1   73.86    6.56
 -11  -1   1   63.52    6.10
 -11   1   1   70.35    6.57
  12   1   1  789.42   25.22
  12  -1  -1  793.59   24.37
  12   1  -1  781.64   25.07
 -12   1  -1  757.41   23.04
  12   1   1  766.86   24.86
  12   1  -1  808.88   27.78
  12  -1   1  822.78   26.05
  12  -1  -1  786.50   24.95
 -12  -1   1  740.95   22.40
 -12   1   1  805.15   25.87
  13   1   1   98.39   11.11
  13   1  -1  101.58    6.08
 -13   1  -1   89.88    4.36
  13   1   1  102.11    7.15
  13   1  -1  103.08    7.86
  13  -1   1  107.32    9.18
  13  -1  -1  103.88    6.77
 -13  -1   1  103.93    6.56
 -13   1   1  109.29    7.05
  14  -1  -1  153.44    7.88
  14   1  -1  165.92    9.08
 -14   1  -1  146.26    7.41
  14   1   1  154.02   10.63
  14   1  -1  147.79    9.02
  14  -1   1  149.17   13.06
  14  -1  -1  148.02    8.43
 -14  -1   1  149.34   10.31
 -14   1   1  167.83   11.61
  15  -1  -1   48.94    9.61
  15   1  -1   41.55   10.27
 -15   1  -1   43.70    6.10
  15   1   1   47.22    5.46
  15   1  -1   49.30    8.19
  15  -1   1   60.90   11.56
  15  -1  -1   47.21    4.65
 -15  -1   1   43.78    8.60
 -15   1   1   52.05   11.14
  16   1  -1  405.65   19.96
 -16   1  -1  420.71   17.63
 -16  -1  -1  417.04   18.35
  16   1   1  412.91   24.08
  16   1  -1  443.76   19.57
  16  -1   1  446.95   31.66
  16  -1  -1  458.84   20.17
  17   1  -1    1.38    1.76
 -17   1  -1   -0.14    1.05
 -17  -1  -1    1.93    2.27
  17   1   1    1.76    2.62
  17  -1   1    0.74    2.28
  17  -1  -1    2.64    3.60
 -17   1   1    1.26    2.12
  18   1  -1  159.54   11.63
 -18   1  -1  166.25    8.50
 -18  -1  -1  164.71    9.15
 -18   1   1  140.31    7.35
  18   1   1  168.27   12.42
  18   1  -1  182.77   15.57
  18  -1  -1  187.02   14.66
  19   1  -1   89.76    9.53
 -19   1  -1   99.32    5.57
 -19  -1  -1  108.47    7.38
 -19   1   1   89.48    5.43
  19   1   1  109.81    7.97
  19   1  -1  112.23   11.55
  19  -1   1  111.96   17.55
  19  -1  -1  117.76    8.55
 -19   1   1  117.72    9.19
  20   1  -1   38.38   15.10
 -20   1  -1   30.47    8.88
 -20  -1  -1   42.42    5.00
 -20   1   1   33.39    3.47
  20   1   1   38.07    8.69
  20   1  -1   30.46   12.29
  20  -1   1   41.50    6.04
  20  -1  -1   40.35   11.81
  21   1   1    1.70    3.06
  21   1  -1    1.39    1.95
  21  -1   1    4.84    4.07
  21  -1  -1    1.18    2.42
 -22  -1  -1   28.60   12.78
  22   1   1   29.94   13.54
  22   1  -1   44.43    5.58
  22  -1   1   48.26    9.57
  22  -1  -1   46.50    5.87
 -23  -1  -1   43.27   11.10
 -23  -1   1   54.01    6.40
  23   1   1   60.96    7.38
  23   1  -1   65.67    8.38
  23  -1   1   61.12    7.89
  23  -1  -1   62.45    7.69
 -24  -1  -1    4.28    3.46
 -24  -1   1    5.69    3.01
  24   1   1    2.46    3.96
  24   1  -1    7.38    4.72
  24  -1   1    8.60    3.34
  24  -1  -1    7.39    3.79
   0   1  -2    0.14    0.68
   0  -1  -2    0.68    0.73
   0   1   2    0.01    0.59
   0   1   2    0.37    0.63
   0   1   2    0.25    0.67
   1   1  -2    5.06    1.13
  -1   1  -2    6.02    1.64
   1  -1   2    5.53    0.87
   1  -1  -2    5.46    0.84
  -1   1   2    5.03    0.76
  -1  -1  -2    5.74    1.30
  -1   1   2    5.45    1.50
   1   1   2    5.49    2.06
   1  -1   2    4.57    0.47
  -1   1  -2    6.21    0.80
   1   1  -2    5.38    0.81
  -1   1   2    4.90    0.95
   2   1  -2  143.10    3.29
  -2   1  -2  136.65    2.50
   2  -1  -2  135.89    2.39
   2  -1   2  140.86    2.26
  -2   1   2  125.61    1.97
  -2  -1  -2  128.26    2.91
   2   1   2  145.62    3.45
   2   1  -2  136.04    2.41
  -2  -1   2  124.89    1.79
  -2   1   2  143.14    3.21
   3   1  -2  156.14    3.74
   3  -1  -2  161.10    2.21
  -3   1   2  148.72    2.38
  -3   1  -2  163.44    2.71
   3  -1   2  170.14    2.58
   3   1   2  164.88    3.82
   3   1  -2  158.17    3.17
  -3   1  -2  175.70    3.67
  -3  -1   2  152.65    2.61
  -3   1   2  170.07    3.96
   4   1  -2  337.45    5.58
   4  -1  -2  317.66    3.24
  -4   1   2  321.86    3.11
  -4   1  -2  328.01    3.74
  -4  -1  -2  342.66    5.72
   4   1   2  332.34    5.52
   4  -1   2  342.41    4.53
   4   1  -2  323.75    4.64
  -4   1   2  332.09    7.01
   5   1  -2  160.03    4.38
   5  -1  -2  147.52    2.74
  -5   1   2  139.47    2.38
  -5   1  -2  154.89    2.85
  -5  -1  -2  161.92    4.53
   5   1   2  155.85    4.41
   5  -1   2  147.30    4.75
   5   1  -2  141.71    3.71
  -5   1   2  151.90    5.70
  -5  -1   2  159.93    3.00
   6   1  -2  153.26    4.82
   6  -1  -2  146.07    3.22
  -6   1  -2  155.18    3.45
  -6  -1  -2  149.51    4.53
   6   1   2  152.08    4.55
   6  -1   2  142.39    5.71
   6   1  -2  141.27    4.26
   6  -1  -2  127.73    3.88
  -6   1   2  150.47    5.40
  -6  -1   2  148.02    3.16
   7   1  -2  181.41    5.98
   7  -1  -2  172.29    4.23
  -7   1  -2  166.25    3.45
  -7  -1  -2  164.60    4.91
   7   1   2  175.34    5.17
   7  -1   2  166.88    6.53
   7   1  -2  157.11    4.75
   7  -1  -2  148.77    5.50
  -7   1   2  174.25    6.92
  -7  -1   2  172.03    3.44
   8   1  -2  541.92   12.71
   8  -1  -2  547.07   11.17
  -8   1  -2  536.53   10.76
  -8  -1  -2  526.53   12.23
   8   1   2  545.78   12.58
   8  -1   2  516.78   12.20
   8   1  -2  517.54   11.88
   8  -1  -2  500.44   11.51
  -8   1   2  551.24   13.75
  -8  -1   2  523.01   10.67
   9  -1  -2   26.41    3.83
   9   1  -2   25.67    6.30
  -9   1  -2   24.98    3.00
  -9  -1  -2   26.40    6.68
   9   1   2   26.12    5.55
   9  -1   2   29.39    5.72
   9   1  -2   26.46    3.25
   9  -1  -2   24.24    4.55
  -9   1   2   27.66    6.51
  -9  -1   2   29.75    3.82
  10  -1  -2  726.12   14.61
  10   1  -2  754.86   16.86
 -10   1  -2  725.38   14.48
 -10  -1  -2  707.17   18.00
  10   1   2  730.58   16.33
  10  -1   2  732.32   17.17
  10   1  -2  742.04   16.43
  10  -1  -2  644.88   14.44
 -10   1   2  768.32   17.68
 -10  -1   2  686.28   14.66
  11  -1  -2  669.76   21.11
  11   1  -2  654.70   22.10
 -11   1  -2  634.21   19.42
 -11  -1  -2  631.81   20.41
  11   1   2  631.58   20.63
  11  -1   2  673.36   21.54
  11   1  -2  633.26   20.62
  11  -1  -2  560.89   18.33
 -11   1   2  664.83   23.96
 -11  -1   2  705.10   22.42
  12  -1  -2   69.25    5.25
  12   1  -2   68.89    5.05
 -12   1  -2   52.90    2.94
 -12  -1  -2   60.12    4.09
  12   1   2   69.34   12.66
  12  -1   2   62.43    4.40
  12   1  -2   63.48    7.86
  12  -1  -2   53.94    4.26
 -12   1   2   63.00    5.35
 -12  -1   2   60.78    5.50
  13   1  -2  204.60    9.35
 -13   1  -2  187.56    6.85
 -13  -1  -2  184.80    8.03
  13   1   2  155.81   12.04
  13  -1   2  200.73    8.23
  13   1  -2  179.41    8.42
  13  -1  -2  146.92   10.17
 -13  -1   2  184.93    8.02
 -13   1   2  199.92    8.84
  14  -1  -2   30.22    4.44
  14   1  -2   38.43   13.56
 -14   1  -2   27.07    2.89
 -14  -1  -2   27.29    3.67
  14   1   2   25.41    4.75
  14  -1   2   29.76    3.48
  14   1  -2   36.92    9.46
  14  -1  -2   28.03    4.37
 -14  -1   2   29.13    5.12
 -14   1   2   32.62    7.81
  15  -1  -2   93.02   10.18
  15   1  -2   96.31    6.21
 -15  -1  -2   82.34    5.72
  15   1   2   89.71    8.27
  15  -1   2   97.16    6.80
  15   1  -2   89.61    9.58
  15  -1  -2   90.40    7.92
 -15   1   2   87.87   12.82
  16  -1  -2  206.75    9.76
  16   1  -2  194.64   11.17
 -16   1  -2  159.90    7.88
 -16  -1  -2  211.41   11.05
  16   1   2  203.70   11.46
  16  -1   2  212.75   11.69
  16   1  -2  221.86   11.74
  16  -1  -2  182.96   10.53
 -16  -1   2  216.80   14.19
 -16   1   2  218.99   13.37
  17  -1  -2    0.58    1.40
  17   1  -2    0.88    2.15
 -17   1  -2    1.70    1.96
 -17  -1  -2    1.16    2.28
  17   1   2    5.28    4.43
  17  -1   2    0.55    2.17
  17   1  -2    0.62    2.24
  17  -1  -2    3.14    3.48
 -17  -1   2    0.49    1.03
 -17   1   2    1.62    1.91
  18  -1  -2  124.68    7.66
  18   1  -2  119.27    9.05
 -18   1  -2  125.06    7.98
 -18  -1  -2  120.54    8.39
  18   1   2  125.57   10.12
  18  -1   2  136.87   12.18
  18   1  -2  124.66   11.10
  18  -1  -2  127.99   10.12
 -18  -1   2  115.25   10.67
 -18   1   2  133.77   18.71
  19   1  -2   41.19   12.21
 -19   1  -2   45.07    4.07
 -19  -1  -2   41.98   13.68
  19   1   2   42.07    6.88
  19  -1   2   57.51   10.45
  19   1  -2   49.65    5.40
  19  -1  -2   42.43    6.02
 -19   1   2   56.87   14.99
 -20  -1  -2    3.33    2.27
  20   1   2    2.19    3.08
  20  -1   2    1.61    2.20
  20   1  -2    1.71    1.96
  20  -1  -2    2.45    2.56
 -20   1   2    3.36    3.36
  21   1  -2    2.03    2.29
 -21   1  -2    1.47    1.10
  21   1   2    2.82    3.00
  21  -1   2    2.83    2.70
  21   1  -2    2.03    3.58
  21  -1  -2    1.09    2.45
 -21   1   2    0.04    1.46
  22   1  -2    7.61    4.68
 -22  -1  -2    8.13    2.97
  22   1   2   11.07    4.79
  22  -1   2    5.43    3.16
  22   1  -2    7.10    2.65
  22  -1  -2    7.30    4.09
  23   1  -2   11.14    6.60
 -23  -1  -2   11.24    3.60
  23   1   2   12.70    6.64
  23  -1   2   14.59    8.81
  23   1  -2    8.37    7.27
  23  -1  -2   11.47    6.41
 -24  -1  -2    2.62    2.36
  24   1   2    9.79    4.32
  24  -1   2    2.47    2.32
  24   1  -2    8.78    4.18
  24  -1  -2    6.01    3.91
   0   1  -3  239.49    3.91
   0  -1  -3  239.31    3.96
   0  -1   3  225.31    2.18
   0   1   3  245.27    4.72
   0   1  -3  230.98    2.20
   1   1  -3  263.04    4.35
  -1   1  -3  253.75    3.74
   1  -1  -3  251.83    3.55
  -1  -1  -3  248.49    4.05
   1   1  -3  255.60    2.57
  -1   1   3  253.41    4.61
   1   1   3  275.63    5.40
   1  -1   3  259.38    2.60
  -1   1  -3  243.29    2.50
  -1   1   3  255.45    4.21
   2   1  -3  195.99    5.41
  -2   1  -3  186.29    3.14
   2  -1  -3  178.59    2.88
  -2  -1  -3  202.07    3.97
   2   1   3  202.07    5.20
   2  -1   3  205.38    2.87
  -2   1  -3  201.77    2.96
  -2   1   3  196.69    4.13
   3   1  -3   47.09    3.38
   3  -1  -3   43.73    2.56
  -3  -1  -3   48.01    3.40
   3   1   3   47.72    3.41
   3   1  -3   46.92    2.62
  -3   1   3   48.40    3.53
   4   1  -3    1.24    1.01
   4  -1  -3    2.20    1.35
  -4   1  -3    1.39    0.59
  -4  -1  -3    2.31    1.18
   4   1   3    1.88    1.23
   4  -1   3    1.56    0.72
   4   1  -3    2.28    1.31
  -4   1   3    3.09    1.53
   5   1  -3  233.08    5.14
   5  -1  -3  225.64    3.46
  -5   1  -3  232.97    3.85
  -5  -1  -3  242.81    5.27
   5   1   3  232.02    5.27
   5   1  -3  221.90    4.27
  -5   1   3  234.50    5.20
   6   1  -3   24.59    7.01
   6  -1  -3   20.66    2.07
  -6   1  -3   22.96    3.21
  -6  -1  -3   21.59    2.38
   6   1   3   23.97    3.80
   6  -1   3   22.97    2.31
   6   1  -3   21.97    2.68
  -6   1   3   24.25    2.76
  -6  -1   3   21.14    1.75
   7   1  -3   14.47    2.07
   7  -1  -3   15.93    1.90
  -7   1  -3   15.29    1.79
  -7  -1  -3   17.21    3.30
   7   1   3   17.49    2.58
   7  -1   3   19.84    5.39
   7   1  -3   17.90    4.68
  -7   1   3   18.98    4.29
  -7  -1   3   14.20    1.63
   8   1  -3   35.35    4.46
   8  -1  -3   43.77    3.42
  -8   1  -3   44.88    6.08
  -8  -1  -3   39.40    5.27
   8   1   3   42.59    4.14
   8  -1   3   36.32    3.72
   8   1  -3   35.58    5.16
   8  -1  -3   37.25    3.77
  -8   1   3   37.38    4.04
  -8  -1   3   36.93    2.92
   9   1  -3 1957.65   28.05
   9  -1  -3 1910.26   23.38
  -9   1  -3 1881.39   33.38
  -9  -1  -3 1910.76   25.66
   9   1   3 1946.87   26.23
   9  -1   3 1932.12   25.49
   9  -1  -3 1964.55   25.63
  -9   1   3 2006.29   27.03
  -9  -1   3 1889.10   33.25
  10   1  -3   47.28    4.54
  10  -1  -3   54.28    4.54
 -10   1  -3   49.46    3.05
 -10  -1  -3   51.63    3.61
  10   1   3   53.72    3.96
  10  -1   3   55.67    4.13
  10   1  -3   52.41    3.58
  10  -1  -3   59.32    4.11
 -10   1   3   60.22    4.51
 -10  -1   3   48.16    2.75
  11   1  -3    8.95    3.90
  11  -1  -3   10.02    3.45
 -11   1  -3    7.47    1.53
 -11  -1  -3    9.69    2.23
  11   1   3    7.49    2.03
  11  -1   3    9.24    2.42
  11   1  -3    7.59    2.48
  11  -1  -3    9.46    2.48
 -11   1   3    8.76    2.80
 -11  -1   3   10.56    3.16
  12   1  -3    0.98    1.25
 -12   1  -3    2.03    1.92
 -12  -1  -3    2.24    1.96
  12   1   3    3.75    3.05
  12  -1   3    1.28    2.39
  12   1  -3    1.50    2.67
  12  -1  -3    1.43    1.78
 -12   1   3   -0.24    1.41
 -12  -1   3   -0.13    0.96
  13  -1  -3  144.17    8.87
  13   1  -3  130.74    8.67
 -13   1  -3  135.16    6.82
 -13  -1  -3  138.74    8.15
  13   1   3  145.20    9.13
  13  -1   3  142.15    8.27
  13   1  -3  149.29    8.83
  13  -1  -3  142.66    8.13
 -13   1   3  145.39   11.19
  14  -1  -3  418.98   13.29
 -14   1  -3  384.36   10.99
 -14  -1  -3  385.73   12.45
  14   1   3  378.22   13.39
  14  -1   3  384.33   14.73
  14   1  -3  395.73   13.12
  14  -1  -3  405.12   13.28
 -14   1   3  422.56   14.19
 -14  -1   3  383.04   12.35
  15  -1  -3  380.75   11.77
  15   1  -3  315.58   12.29
 -15   1  -3  339.95   11.08
 -15  -1  -3  342.60   12.61
  15   1   3  337.23   13.00
  15  -1   3  333.70   14.94
  15   1  -3  337.65   12.28
  15  -1  -3  336.78   12.67
 -15  -1   3  336.82   11.62
 -15   1   3  334.08   14.79
  16  -1  -3    4.90    2.14
  16   1  -3    4.90    2.83
 -16   1  -3    4.87    2.68
 -16  -1  -3    6.06    2.15
  16   1   3    4.35    2.94
  16  -1   3    7.68    3.67
  16   1  -3    5.73    2.68
  16  -1  -3    4.95    2.92
 -16   1   3    6.22    2.68
  17  -1  -3    9.23    4.30
  17   1  -3   12.49    5.35
 -17   1  -3   12.41    3.70
 -17  -1  -3   11.87    5.29
  17   1   3    9.37    3.59
  17  -1   3   10.76    3.30
  17   1  -3    8.11    3.86
  17  -1  -3    8.22    3.53
 -17  -1   3   11.93    4.30
 -17   1   3   14.00    5.46
  18  -1  -3   12.15    6.61
  18   1  -3   15.49    6.19
 -18   1  -3   19.74    2.84
 -18  -1  -3   17.42    8.46
  18   1   3   16.18    4.66
  18  -1   3   24.31    4.56
  18   1  -3   16.75    5.61
  18  -1  -3   15.20    3.69
 -18  -1   3   18.47    7.02
 -18   1   3   20.65    7.90
  19  -1  -3  207.31    9.30
  19   1  -3  217.16   12.77
 -19   1  -3  225.95   11.05
 -19  -1  -3  214.37   10.49
  19   1   3  228.95   12.51
  19  -1   3  237.05   12.66
  19   1  -3  221.39   12.33
  19  -1  -3  229.80   11.86
 -19  -1   3  227.81   12.68
 -19   1   3  208.43   18.73
  20  -1  -3   25.98    9.33
  20   1  -3   29.86   12.58
 -20   1  -3   26.14    9.41
 -20  -1  -3   26.15    4.18
  20   1   3   29.36    5.74
  20  -1   3   36.55    5.95
  20   1  -3   31.46    5.30
  20  -1  -3   40.05    6.20
 -20   1   3   33.43   10.47
  21   1  -3   22.50    9.40
 -21   1  -3   24.23    3.89
 -21  -1  -3   22.44   10.30
  21   1   3   26.92    7.25
  21  -1   3   33.11    8.43
  21   1  -3   23.60    4.66
  21  -1  -3   25.29    9.29
 -21   1   3   26.59   10.32
  22   1  -3    0.35    1.75
 -22  -1  -3    2.18    2.64
  22   1   3    5.25    3.04
  22  -1   3    0.17    2.09
  22   1  -3    1.23    2.96
  22  -1  -3    4.04    3.53
 -22   1   3    2.75    3.03
  23   1  -3   41.58   14.29
 -23  -1  -3   51.03    5.89
  23   1   3   51.22    6.86
  23  -1   3   45.51   10.13
  23   1  -3   49.42    8.81
  23  -1  -3   56.02   12.79
  24   1  -3    6.90    5.97
 -24  -1  -3   10.91    3.38
  24   1   3   13.13    6.06
  24  -1   3    8.32    7.22
  24   1  -3    7.44    5.14
  24  -1  -3   10.84    8.89
   0   1  -4    0.41    1.05
   0  -1  -4    0.65    1.22
   0  -1   4    0.27    0.53
   0   1   4    0.49    1.03
   0   1  -4   -0.04    0.22
   1   1  -4  203.18    4.31
  -1   1  -4  205.68    4.16
   1  -1  -4  187.90    3.68
  -1  -1  -4  188.12    3.80
  -1   1   4  194.90    4.48
   1   1  -4  204.75    2.85
   1   1   4  205.52    4.50
   1  -1   4  207.35    2.95
  -1   1  -4  207.30    2.88
   2   1  -4    8.87    1.69
  -2   1  -4   10.64    1.63
   2  -1  -4   11.70    2.48
  -2  -1  -4   11.83    4.26
   2   1   4    9.36    3.72
   2  -1   4    9.22    1.24
  -2   1  -4    8.86    0.98
  -2   1   4   10.76    1.75
   3   1  -4    0.50    1.48
   3  -1  -4    0.12    0.56
  -3   1  -4    0.38    0.72
  -3  -1  -4    0.65    1.46
   3   1   4    0.72    1.05
   3  -1   4   -0.07    0.58
  -3   1   4    1.56    1.90
   4   1  -4  475.31    6.96
   4  -1  -4  455.62    5.31
  -4   1  -4  455.37    5.78
  -4  -1  -4  456.16    6.62
   4   1   4  473.76    7.24
   4  -1   4  452.38    5.41
   4   1  -4  429.63    5.06
  -4   1   4  454.50    6.86
   5   1  -4  168.27    4.63
   5  -1  -4  165.78    3.52
  -5   1  -4  164.88    3.81
  -5  -1  -4  173.55    5.24
   5   1   4  162.03    4.64
   5  -1   4  168.47    3.94
   5   1  -4  159.59    3.96
  -5   1   4  171.95    6.83
   6   1  -4   29.79    3.24
   6  -1  -4   33.36    2.85
  -6   1  -4   38.05    3.90
  -6  -1  -4   33.75    3.37
   6   1   4   33.24    4.44
   6  -1   4   37.85    3.49
   6   1  -4   31.92    3.08
  -6   1   4   29.32    3.02
   7   1  -4    4.80    1.58
   7  -1  -4    5.36    1.27
  -7   1  -4    7.40    2.68
  -7  -1  -4    5.25    1.70
   7   1   4    6.21    2.07
   7  -1   4    7.65    2.39
   7   1  -4    6.15    2.88
  -7   1   4    4.69    1.46
  -7  -1   4    5.96    1.96
   8   1  -4   31.20    3.41
   8  -1  -4   35.81    3.26
  -8   1  -4   36.24    3.24
  -8  -1  -4   29.14    3.20
   8   1   4   36.82    4.75
   8  -1   4   36.72    5.10
   8   1  -4   31.62    3.24
  -8   1   4   34.44    3.42
  -8  -1   4   32.05    2.95
   9   1  -4   24.33    2.76
   9  -1  -4   31.31    2.67
  -9   1  -4   29.66    3.99
  -9  -1  -4   26.94    2.78
   9   1   4   30.69    2.93
   9  -1   4   30.22    3.00
   9   1  -4   28.50    5.63
   9  -1  -4   28.26    3.05
  -9   1   4   27.29    2.72
  -9  -1   4   32.48    5.50
  10   1  -4   54.85    9.92
  10  -1  -4   54.79    3.61
 -10   1  -4   56.83    3.50
 -10  -1  -4   57.78    7.61
  10   1   4   61.39    4.45
  10  -1   4   57.27    5.09
  10   1  -4   51.93    5.01
  10  -1  -4   51.87    4.65
 -10   1   4   58.54    5.58
 -10  -1   4   53.13    2.98
  11   1  -4  179.46    7.81
  11  -1  -4  186.33    7.59
 -11   1  -4  202.38    7.05
 -11  -1  -4  189.97    7.68
  11   1   4  202.82    8.28
  11  -1   4  197.59   12.71
  11   1  -4  173.43    7.24
  11  -1  -4  220.63    8.49
 -11   1   4  208.31    9.22
 -11  -1   4  186.92    6.61
  12   1  -4   24.33    8.74
  12  -1  -4   23.70    7.15
 -12   1  -4   25.10    2.53
 -12  -1  -4   23.42    6.03
  12   1   4   24.64    3.62
  12  -1   4   24.06    6.46
  12   1  -4   23.63    3.46
  12  -1  -4   25.42    3.78
 -12   1   4   30.81    6.00
 -12  -1   4   25.67    5.98
  13  -1  -4  194.63    9.57
  13   1  -4  195.45   10.30
 -13   1  -4  199.40    9.36
 -13  -1  -4  185.78   14.99
  13   1   4  199.69   11.01
  13  -1   4  198.52   10.59
  13   1  -4  181.25    9.72
  13  -1  -4  198.59   10.57
 -13   1   4  189.96   10.82
 -13  -1   4  202.62   10.79
  14  -1  -4   46.44   11.54
  14   1  -4   44.24   11.29
 -14   1  -4   44.55    3.56
 -14  -1  -4   41.42    3.95
  14   1   4   47.72    5.33
  14  -1   4   54.21    9.52
  14   1  -4   48.99   10.29
  14  -1  -4   43.15    4.62
 -14   1   4   52.53    7.24
 -14  -1   4   52.95    7.77
  15  -1  -4  286.16   12.85
  15   1  -4  267.32   15.68
 -15   1  -4  289.94   13.30
 -15  -1  -4  292.15   13.74
  15   1   4  308.60   15.53
  15  -1   4  295.11   14.56
  15   1  -4  318.78   15.29
  15  -1  -4  317.23   15.16
 -15   1   4  300.46   16.05
 -15  -1   4  297.19   14.54
  16  -1  -4   24.84    6.68
  16   1  -4   26.79    9.25
 -16   1  -4   27.88    6.58
 -16  -1  -4   26.28    3.67
  16   1   4   32.16    5.13
  16  -1   4   26.30   10.82
  16   1  -4   25.27   10.14
  16  -1  -4   28.72    4.99
 -16   1   4   35.22    8.77
 -16  -1   4   33.68    8.93
  17  -1  -4   59.24   10.19
  17   1  -4   59.07   15.42
 -17   1  -4   53.56    9.12
 -17  -1  -4   56.57   13.22
  17   1   4   59.30    6.23
  17  -1   4   65.56    6.47
  17   1  -4   64.03    5.75
  17  -1  -4   69.25    7.07
 -17  -1   4   56.34   11.41
 -17   1   4   65.06   10.84
  18  -1  -4    0.57    1.16
  18   1  -4   -0.29    1.76
 -18  -1  -4    1.17    2.76
  18   1   4    0.55    2.41
  18  -1   4   11.17    5.17
  18   1  -4    0.74    1.80
  18  -1  -4    2.16    3.69
 -18  -1   4    0.85    1.65
 -18   1   4    1.94    2.16
  19  -1  -4    7.58    3.50
  19   1  -4   11.15    5.44
 -19   1  -4    8.66    3.16
 -19  -1  -4    8.59    2.65
  19   1   4    7.96    3.49
  19  -1   4    7.69    3.35
  19   1  -4   11.61    5.42
  19  -1  -4    8.45    3.43
 -19  -1   4    5.57    2.51
 -19   1   4    9.53    4.23
  20  -1  -4    0.53    0.93
  20   1  -4   -0.37    1.91
 -20  -1  -4    2.51    2.84
  20   1   4    3.21    3.50
  20  -1   4    2.57    3.37
  20   1  -4    1.11    1.64
  20  -1  -4    1.39    2.69
 -20   1   4    1.20    2.88
  21   1  -4   24.23   10.39
 -21   1  -4   25.40    3.86
 -21  -1  -4   21.69    9.24
  21   1   4   21.37    5.18
  21  -1   4   22.07    9.22
  21   1  -4   23.12    4.62
  21  -1  -4   24.33    5.45
 -21   1   4   19.31    8.90
 -22  -1  -4   11.99    7.73
  22   1   4   17.18    7.09
  22  -1   4   18.53    4.88
  22   1  -4   15.33    5.23
  22  -1  -4   17.23    4.64
 -22   1   4   17.17    9.70
  23   1  -4   26.00   12.05
  23   1   4   27.52    5.81
  23  -1   4   20.59   11.67
  23   1  -4   28.49    5.73
  23  -1  -4   27.02    5.93
 -23   1   4   19.48   11.98
 -24  -1  -4    2.23    1.98
  24   1   4    6.80    4.83
  24  -1   4    2.37    4.06
  24   1  -4    2.54    2.72
  24  -1  -4    2.04    2.41
   0   1  -5   45.73    3.23
   0  -1  -5   44.99    3.20
   0  -1   5   45.46    4.17
   0   1   5   49.07    4.47
   1   1  -5   54.39    3.73
  -1   1  -5   55.29    4.25
   1  -1  -5   44.47    2.95
  -1  -1  -5   46.46    3.18
  -1   1   5   52.61    4.08
   1  -1   5   50.51    3.13
   1   1   5   51.55    4.57
   2   1  -5 1227.24   10.76
  -2  -1  -5 1273.37   10.45
   3   1  -5   94.50    5.42
   3  -1  -5   96.45    5.12
  -3   1  -5   96.71    5.24
  -3  -1  -5   95.76    5.43
   3   1   5  104.06    8.27
   3  -1   5  101.56    6.42
  -3   1   5   99.68    7.47
   4   1  -5  207.63    6.27
   4  -1  -5  219.42    5.60
  -4   1  -5  224.89    6.02
  -4  -1  -5  237.63    6.68
   4   1   5  242.47    6.97
   4  -1   5  234.88    6.18
  -4   1   5  239.47    6.76
   5   1  -5   86.72    4.91
   5  -1  -5   97.85    3.79
  -5   1  -5   97.88    3.55
  -5  -1  -5  101.87    4.24
   5   1   5  102.14    4.54
   5  -1   5  103.33    3.85
   5   1  -5   89.68    3.15
  -5   1   5  103.93    4.44
   6   1  -5    1.27    1.66
   6  -1  -5    0.92    1.45
  -6   1  -5    0.50    1.53
  -6  -1  -5    0.87    1.65
   6   1   5    0.91    2.06
   6  -1   5    1.52    1.53
   6   1  -5    0.56    1.09
  -6   1   5    0.53    1.34
   7   1  -5  889.29   18.43
   7  -1  -5  948.84   18.06
  -7   1  -5  941.54   18.07
  -7  -1  -5  922.37   18.47
   7   1   5  920.21   20.55
   7  -1   5  983.01   19.12
   7   1  -5  917.89   17.97
  -7   1   5  905.86   18.38
  -7  -1   5  910.07   17.67
   8   1  -5  520.87   17.08
   8  -1  -5  575.97   17.71
  -8   1  -5  577.32   17.79
  -8  -1  -5  578.71   18.44
   8   1   5  587.75   18.88
   8  -1   5  609.07   19.03
   8   1  -5  536.72   16.90
  -8   1   5  593.58   18.94
  -8  -1   5  607.74   18.70
   9   1  -5  222.00    8.94
   9  -1  -5  240.14    8.76
  -9   1  -5  235.93    8.81
  -9  -1  -5  229.14    8.91
   9   1   5  222.58    8.99
   9  -1   5  241.73    9.75
   9   1  -5  213.22    8.19
   9  -1  -5  224.32    9.21
  -9   1   5  246.20    9.99
  -9  -1   5  227.43    8.38
  10   1  -5   61.46    3.98
  10  -1  -5   66.08    3.96
 -10   1  -5   61.23    3.50
 -10  -1  -5   60.87    3.77
  10   1   5   65.39    6.32
  10  -1   5   69.99    4.55
  10   1  -5   62.78    3.82
  10  -1  -5   61.99    4.77
 -10   1   5   63.52    4.19
 -10  -1   5   65.13    4.62
  11   1  -5  213.03    8.52
  11  -1  -5  186.60    6.91
 -11   1  -5  207.98    7.34
 -11  -1  -5  203.43    8.03
  11   1   5  218.45    8.96
  11  -1   5  207.71    8.71
  11   1  -5  185.97    7.75
  11  -1  -5  200.49    9.02
 -11   1   5  203.62    8.99
 -11  -1   5  200.01    7.13
  12   1  -5   70.57   10.03
  12  -1  -5   67.62    5.01
 -12   1  -5   67.39    6.22
 -12  -1  -5   62.23    4.87
  12   1   5   63.29    5.23
  12  -1   5   66.18    5.15
  12   1  -5   64.98    5.58
  12  -1  -5   67.49    5.22
 -12   1   5   72.95   10.28
 -12  -1   5   65.08    8.31
  13   1  -5   12.67    4.28
  13  -1  -5   11.16    4.59
 -13   1  -5   15.41    4.18
 -13  -1  -5   15.50    6.04
  13   1   5    8.90    2.86
  13  -1   5   12.55    5.70
  13   1  -5   14.09    3.16
  13  -1  -5   13.43    4.07
 -13   1   5   17.05    4.62
 -13  -1   5   11.32    2.58
  14   1  -5   57.01   13.47
  14  -1  -5   49.65    9.56
 -14   1  -5   62.49    7.40
 -14  -1  -5   54.06    7.30
  14   1   5   56.72    5.41
  14  -1   5   54.13    8.93
  14   1  -5   47.81    8.43
  14  -1  -5   57.62    8.26
 -14   1   5   64.72   14.18
 -14  -1   5   66.41   12.89
  15   1  -5  158.62   12.69
  15  -1  -5  153.20   10.41
 -15   1  -5  169.52   10.43
  15   1   5  163.02   11.36
  15  -1   5  154.37   10.68
  15   1  -5  161.64   10.80
  15  -1  -5  189.30   12.00
 -15   1   5  162.43   15.86
 -15  -1   5  184.20   11.92
  16  -1  -5  225.99   12.03
  16   1  -5  234.03   13.03
 -16   1  -5  253.02   18.06
 -16  -1  -5  232.30   11.76
  16   1   5  237.20   12.44
  16  -1   5  228.94   12.25
  16   1  -5  248.87   12.44
  16  -1  -5  238.50   12.28
 -16   1   5  232.36   13.66
 -16  -1   5  249.59   12.22
  17  -1  -5  281.70   15.13
  17   1  -5  250.56   14.87
 -17   1  -5  282.41   15.08
 -17  -1  -5  270.29   16.23
  17   1   5  270.91   16.68
  17  -1   5  261.83   16.74
  17   1  -5  291.29   16.64
  17  -1  -5  305.35   17.25
 -17   1   5  285.30   19.18
 -17  -1   5  285.74   15.74
  18  -1  -5    2.20    2.11
  18   1  -5   -0.15    1.86
 -18   1  -5    0.72    1.11
 -18  -1  -5    1.99    2.54
  18   1   5    1.18    2.39
  18  -1   5    2.76    2.60
  18   1  -5   -0.37    2.22
  18  -1  -5    2.23    3.14
 -18   1   5    1.40    3.09
 -18  -1   5    1.48    1.84
  19  -1  -5   75.97    8.01
  19   1  -5   80.32   16.81
 -19   1  -5   70.20   12.59
 -19  -1  -5   78.22    6.30
  19   1   5   77.58    7.99
  19  -1   5   74.66   11.08
  19   1  -5   88.99    8.19
  19  -1  -5   77.84    7.01
 -19  -1   5   65.73   12.96
 -19   1   5   75.89   19.09
  20   1  -5  101.14   11.44
 -20   1  -5   92.76    9.15
 -20  -1  -5   71.15   13.97
  20   1   5   93.16   10.61
  20  -1   5   88.49   22.50
  20   1  -5   77.62   16.36
  20  -1  -5   93.14    9.66
 -20   1   5   89.25   15.85
  21   1  -5    1.37    2.56
 -21  -1  -5    1.77    2.87
  21   1   5    2.82    3.29
  21  -1   5    3.77    3.33
  21   1  -5    0.52    1.79
  21  -1  -5    2.22    2.28
 -21   1   5    0.17    1.75
  22   1  -5   26.50   14.52
 -22  -1  -5   29.95   10.25
  22   1   5   35.71    5.67
  22  -1   5   37.80    6.22
  22   1  -5   38.49    7.42
  22  -1  -5   43.05    7.76
 -22   1   5   30.92   13.75
  23   1  -5    8.44    4.25
 -23  -1  -5   10.57    3.30
  23   1   5   11.55    4.06
  23  -1   5   12.62    4.04
  23   1  -5    7.96    3.08
  23  -1  -5   15.20    5.76
 -23   1   5    7.51    4.00
   0   1  -6    0.77    1.05
   0  -1  -6    1.27    1.57
   0  -1   6    0.39    0.59
   0   1   6    0.21    0.64
   1   1  -6   17.73    3.18
  -1   1  -6   20.03    3.73
   1  -1  -6   17.90    2.21
  -1  -1  -6   18.64    3.23
  -1   1   6   17.63    3.86
   1  -1   6   17.33    3.38
   1   1   6   16.21    3.19
   2   1  -6  110.41    4.66
  -2   1  -6  125.29    4.47
   2  -1  -6  110.84    4.14
  -2  -1  -6  109.83    4.06
   2   1   6  123.99    5.18
   2  -1   6  135.64    4.53
   3   1  -6    1.97    2.24
   3  -1  -6    1.01    1.45
  -3   1  -6    0.61    1.30
  -3  -1  -6    4.07    1.86
   3   1   6    0.34    1.15
   3  -1   6    1.25    0.80
  -3   1   6    1.26    2.05
   4   1  -6    3.33    1.68
   4  -1  -6    3.11    1.32
  -4   1  -6    2.79    1.63
  -4  -1  -6    2.35    1.23
   4   1   6    2.63    1.39
   4  -1   6    1.68    0.95
  -4   1   6    3.35    1.59
   5   1  -6  878.92   17.98
   5  -1  -6  849.18   16.54
  -5   1  -6  837.66   16.50
  -5  -1  -6  833.50   16.94
   5   1   6  850.85   17.55
   5  -1   6  853.90   16.63
  -5   1   6  889.09   18.06
   6   1  -6  257.65    7.71
   6  -1  -6  285.65    7.34
  -6   1  -6  273.35    7.12
  -6  -1  -6  284.75    7.98
   6   1   6  280.32   10.36
   6  -1   6  293.09    8.51
   6   1  -6  272.22    9.26
  -6   1   6  273.05    8.09
   7   1  -6  146.22    6.66
   7  -1  -6  143.98    6.09
  -7   1  -6  139.83    7.33
  -7  -1  -6  152.44    9.20
   7   1   6  135.12    6.19
   7  -1   6  143.69    6.14
   7   1  -6  138.16    5.80
  -7   1   6  129.96    6.18
   8   1  -6   81.36    5.14
   8  -1  -6   77.45    3.89
  -8   1  -6   77.65    3.53
  -8  -1  -6   84.50    4.88
   8   1   6   78.50    4.83
   8  -1   6   79.99    5.38
   8   1  -6   76.57    7.30
  -8   1   6   73.64    4.05
  -8  -1   6   75.80    4.06
   9   1  -6    1.17    2.01
   9  -1  -6    2.03    1.23
  -9   1  -6    2.21    1.16
  -9  -1  -6    1.06    1.39
   9   1   6    2.48    2.04
   9  -1   6    1.75    1.27
   9   1  -6    3.68    3.17
  -9   1   6    3.28    1.51
  -9  -1   6    2.14    2.12
  10   1  -6   45.44    3.87
  10  -1  -6   58.85    3.62
 -10   1  -6   52.89    3.60
 -10  -1  -6   56.28    7.43
  10   1   6   54.18    3.98
  10  -1   6   48.80    3.31
  10   1  -6   55.92    7.42
  10  -1  -6   58.65    9.16
 -10   1   6   51.27    3.87
 -10  -1   6   56.82    7.04
  11   1  -6   48.18    9.87
  11  -1  -6   51.70    4.52
 -11   1  -6   50.85    3.41
 -11  -1  -6   46.87    3.95
  11   1   6   50.21    4.09
  11  -1   6   50.93    4.45
  11   1  -6   50.79    4.06
  11  -1  -6   53.65    9.08
 -11   1   6   55.49    4.68
 -11  -1   6   54.02    8.18
  12   1  -6    1.85    2.21
  12  -1  -6    0.78    1.23
 -12   1  -6    0.87    1.99
 -12  -1  -6    0.64    1.62
  12   1   6    2.43    2.78
  12  -1   6    2.50    2.52
  12   1  -6    0.80    2.24
  12  -1  -6    2.28    2.93
 -12   1   6    0.46    1.82
 -12  -1   6    3.64    2.54
  13   1  -6  178.57   10.06
  13  -1  -6  174.53    9.33
 -13   1  -6  183.06   11.73
 -13  -1  -6  175.57    7.68
  13   1   6  168.71    7.91
  13  -1   6  171.21    7.74
  13   1  -6  168.46    7.54
  13  -1  -6  178.40    8.00
 -13   1   6  173.46    9.65
 -13  -1   6  179.38    7.53
  14   1  -6   30.87    9.01
  14  -1  -6   28.06    8.30
 -14   1  -6   23.23    2.82
 -14  -1  -6   28.27    3.52
  14   1   6   25.64    4.34
  14  -1   6   30.53   11.64
  14   1  -6   29.18    8.26
  14  -1  -6   28.48    8.97
 -14   1   6   36.19    9.48
 -14  -1   6   24.78    4.77
  15   1  -6   95.60   18.33
  15  -1  -6  112.22    8.97
 -15   1  -6  123.27    8.18
 -15  -1  -6  106.27   13.47
  15   1   6  123.29   12.85
  15  -1   6  108.07    8.65
  15   1  -6  104.05    8.06
  15  -1  -6  107.86    8.93
 -15   1   6  123.16   19.41
 -15  -1   6  116.42   12.52
  16  -1  -6   27.56    9.40
  16   1  -6   29.51   12.99
 -16   1  -6   39.53    4.24
 -16  -1  -6   33.43    8.77
  16   1   6   31.30    7.68
  16  -1   6   32.40    4.96
  16   1  -6   33.00    4.88
  16  -1  -6   37.04    5.61
 -16   1   6   41.43    9.41
 -16  -1   6   35.92    8.52
 -17   1  -6    1.75    2.43
 -17  -1  -6    1.14    2.44
  17   1   6    0.74    2.32
  17  -1   6    1.29    2.14
  17   1  -6    1.53    2.30
  17  -1  -6    1.56    3.54
 -17   1   6   -0.30    1.70
  18  -1  -6   15.10    6.70
  18   1  -6   18.07    9.87
 -18   1  -6   15.21    5.06
 -18  -1  -6   16.23    3.49
  18   1   6   14.83    5.33
  18  -1   6   16.41    4.70
  18   1  -6   18.27    7.50
  18  -1  -6   22.11    6.76
 -18   1   6   21.28    6.60
 -18  -1   6   17.11    6.51
  19  -1  -6  111.76   10.82
  19   1  -6  111.21   11.25
 -19   1  -6  111.76   11.60
 -19  -1  -6  115.20    9.47
  19   1   6  103.28    9.90
  19  -1   6  109.11    9.15
  19   1  -6  112.63    9.70
  19  -1  -6  120.67   10.07
 -19   1   6  120.82   13.83
 -19  -1   6  102.54   12.78
  20   1  -6   16.53    6.23
 -20   1  -6   17.21    3.11
 -20  -1  -6   11.79    3.00
  20   1   6   10.49    4.80
  20  -1   6   15.06    5.15
  20   1  -6   14.65    3.90
  20  -1  -6   16.59    4.95
 -20   1   6   16.14    7.86
  21   1  -6   29.43   20.65
 -21   1  -6   33.64    4.14
  21   1   6   28.97   13.60
  21  -1   6   33.26   10.71
  21   1  -6   26.82   15.00
 -21   1   6   30.66   14.32
  22   1  -6   22.44   15.18
 -22  -1  -6   30.98    4.92
  22   1   6   24.28   16.92
  22  -1   6   32.82    5.92
  22   1  -6   33.10   11.80
  22  -1  -6   37.49    6.83
 -22   1   6   24.61   15.00
 -23  -1  -6    0.28    1.99
  23   1   6    1.32    2.14
  23  -1   6    2.42    3.00
  23   1  -6    4.77    4.55
  23  -1  -6    1.20    3.95
 -23   1   6    0.59    1.57
   0   1  -7  522.42   11.70
   0  -1  -7  568.07   12.52
   0  -1   7  512.39   10.65
   0   1   7  570.53   13.20
   1   1  -7  321.75    8.63
  -1   1  -7  305.42    8.10
   1  -1  -7  285.47    7.89
  -1  -1  -7  306.94    7.91
  -1   1   7  274.24    8.15
   1  -1   7  298.64    7.98
   1   1   7  280.05    8.18
   2   1  -7  192.80    6.97
  -2   1  -7  225.55    6.72
   2  -1  -7  228.28    7.32
  -2  -1  -7  236.83    8.01
   2  -1   7  235.46    6.44
   2   1   7  225.71    6.98
   3   1  -7   63.63    5.37
   3  -1  -7   68.98    5.32
  -3   1  -7   69.16    5.21
  -3  -1  -7   72.67    7.53
   3   1   7   68.48    7.95
   3  -1   7   72.51    5.84
   4   1  -7   22.02    2.97
   4  -1  -7   20.89    2.23
  -4   1  -7   26.97    7.13
  -4  -1  -7   12.83    2.14
   4   1   7   21.19    6.30
   4  -1   7   21.59    5.14
  -4   1   7   18.70    2.26
   5   1  -7  414.61   14.01
   5  -1  -7  472.98   15.50
  -5   1  -7  453.99   14.72
  -5  -1  -7  457.16   15.00
   5   1   7  481.65   16.05
   5  -1   7  469.17   14.99
  -5   1   7  430.90   15.19
   6   1  -7   85.43    5.17
   6  -1  -7   85.64    4.62
  -6   1  -7   87.33    4.62
  -6  -1  -7   88.12    5.08
   6   1   7   90.69    5.13
   6  -1   7   93.08    4.77
  -6   1   7   81.53    4.78
   7   1  -7  336.88   12.88
   7  -1  -7  362.03   12.26
  -7   1  -7  361.28   12.29
  -7  -1  -7  356.27   12.39
   7   1   7  356.58   12.74
   7  -1   7  364.70   12.40
   7   1  -7  346.35   11.61
  -7   1   7  331.05   12.43
   8   1  -7    7.58    2.14
   8  -1  -7   11.42    2.36
  -8   1  -7    8.74    2.00
  -8  -1  -7    8.90    4.26
   8   1   7    9.55    2.39
   8  -1   7   10.63    2.63
   8   1  -7    8.83    3.41
  -8   1   7    7.92    2.34
  -8  -1   7   10.04    2.06
   9   1  -7   22.51    3.38
   9  -1  -7   22.43    5.48
  -9   1  -7   24.02    3.17
  -9  -1  -7   19.65    2.98
   9   1   7   14.74    2.40
   9  -1   7   24.80    3.76
   9   1  -7   24.26    3.84
  -9   1   7   20.90    3.28
  -9  -1   7   21.20    6.53
  10   1  -7   25.90    3.42
  10  -1  -7   28.64    3.12
 -10   1  -7   31.95    3.09
 -10  -1  -7   32.45    4.45
  10   1   7   28.02    3.34
  10  -1   7   33.74    7.40
  10   1  -7   31.24    3.67
 -10   1   7   32.65    7.31
 -10  -1   7   31.41    3.20
  11   1  -7  201.92    8.39
  11  -1  -7  222.28    8.37
 -11   1  -7  220.50    8.11
 -11  -1  -7  230.55   13.68
  11   1   7  205.85    8.66
  11  -1   7  224.36    9.44
  11   1  -7  206.08    7.82
  11  -1  -7  209.32    8.24
 -11   1   7  212.42    8.76
 -11  -1   7  221.64    8.60
  12   1  -7   62.61    8.39
  12  -1  -7   65.95    4.63
 -12   1  -7   67.38    4.53
 -12  -1  -7   75.57    5.21
  12   1   7   69.96   11.21
  12  -1   7   62.54    5.27
  12   1  -7   61.72    4.81
  12  -1  -7   71.25   10.95
 -12   1   7   73.02    5.30
 -12  -1   7   71.90    4.56
  13   1  -7    5.34    2.93
  13  -1  -7    6.78    3.19
 -13   1  -7    4.72    1.84
 -13  -1  -7    5.53    2.19
  13   1   7    6.50    4.02
  13  -1   7    8.56    3.21
  13   1  -7    5.06    2.50
  13  -1  -7    8.59    3.01
 -13   1   7    7.63    3.06
 -13  -1   7    6.63    2.14
  14   1  -7  102.97   11.29
  14  -1  -7  104.36    7.40
 -14   1  -7  109.46    7.48
 -14  -1  -7  114.40    8.41
  14   1   7  111.38    8.68
  14  -1   7  108.04    8.61
  14   1  -7   99.55    7.80
  14  -1  -7  108.53    8.04
 -14   1   7  107.45   15.18
 -14  -1   7  104.11   10.12
  15   1  -7   25.54    9.43
  15  -1  -7   24.89    3.57
 -15   1  -7   22.43    7.68
 -15  -1  -7   23.56    3.52
  15   1   7   24.16    4.15
  15  -1   7   24.32    4.54
  15   1  -7   21.72    5.25
  15  -1  -7   25.72    4.57
 -15   1   7   31.44    9.56
 -15  -1   7   22.16    9.44
  16   1  -7    4.00    2.28
  16  -1  -7    3.84    2.22
 -16   1  -7    0.86    1.66
 -16  -1  -7    2.90    2.93
  16   1   7    3.34    2.64
  16  -1   7    3.83    3.14
  16   1  -7    3.66    3.22
  16  -1  -7    4.77    2.61
 -16   1   7    3.53    2.44
 -16  -1   7    3.09    1.47
  17   1  -7  204.87   12.73
 -17   1  -7  237.24   12.02
 -17  -1  -7  223.83   12.28
  17   1   7  232.75   13.25
  17  -1   7  208.86   11.90
  17   1  -7  213.78   12.52
  17  -1  -7  225.50   14.28
 -17  -1   7  250.23   13.72
  18  -1  -7   20.87    7.74
  18   1  -7   25.82    9.58
 -18   1  -7   21.04    3.26
 -18  -1  -7   23.28    6.71
  18   1   7   25.58    5.26
  18  -1   7   26.02    4.44
  18   1  -7   25.50    5.72
  18  -1  -7   28.62    5.17
 -18   1   7   26.66   10.85
 -18  -1   7   26.38    7.05
  19  -1  -7    5.37    3.03
  19   1  -7    9.61    5.55
 -19   1  -7    7.24    2.64
 -19  -1  -7    4.75    2.10
  19   1   7    4.37    2.84
  19  -1   7    5.98    2.47
  19   1  -7    6.35    3.72
  19  -1  -7    8.49    4.15
 -19   1   7    8.42    3.88
 -19  -1   7    7.08    2.23
  20   1  -7   -0.27    1.96
 -20   1  -7    0.95    1.89
 -20  -1  -7    0.81    1.82
  20   1   7    2.45    2.73
  20  -1   7    1.99    1.88
  20   1  -7   -0.09    2.36
  20  -1  -7    2.94    3.64
 -20   1   7    4.01    3.57
  21   1  -7    6.16    4.31
 -21   1  -7    4.90    2.41
 -21  -1  -7    7.19    3.13
  21   1   7    6.36    4.72
  21  -1   7    6.28    3.25
  21   1  -7    5.82    3.08
  21  -1  -7    9.04    4.26
  22   1  -7    6.83    4.61
 -22  -1  -7   13.34    3.44
  22   1   7    6.99    3.99
  22  -1   7   13.96    4.65
  22   1  -7    9.72    8.13
  22  -1  -7    9.17    3.66
 -22   1   7   12.27    5.36
   0   1  -8    0.13    1.23
   0  -1  -8    0.29    1.34
   0  -1   8    0.60    0.88
   0   1   8    0.37    0.87
   1   1  -8  295.64   10.70
  -1   1  -8  326.95   11.40
   1  -1  -8  317.25   11.08
  -1  -1  -8  334.94   11.49
  -1   1   8  301.12   10.77
   1  -1   8  335.52   11.86
   1   1   8  300.93   11.25
   2   1  -8  307.07   11.07
  -2   1  -8  344.10   12.13
   2  -1  -8  288.95   10.22
  -2  -1  -8  307.53   10.78
   2  -1   8  286.34   10.38
   2   1   8  276.94   10.39
   3   1  -8   56.45    4.17
   3  -1  -8   55.66    3.89
  -3   1  -8   60.05    6.02
  -3  -1  -8   55.70    3.60
   3   1   8   53.31    8.70
   3  -1   8   50.46    3.64
   4   1  -8    3.25    1.52
   4  -1  -8    3.22    2.22
  -4   1  -8    2.44    1.35
  -4  -1  -8    2.32    1.40
   4   1   8    3.09    1.61
   4  -1   8    2.59    1.11
  -4   1   8    2.05    1.52
   5   1  -8   10.96    2.59
   5  -1  -8   10.12    2.25
  -5   1  -8   12.18    4.21
  -5  -1  -8   10.31    2.28
   5   1   8   10.60    5.04
   5  -1   8    9.83    3.40
  -5   1   8   11.02    2.25
   6   1  -8  111.76    6.22
   6  -1  -8  107.56    5.26
  -6   1  -8  119.49    5.76
  -6  -1  -8  119.01    5.74
   6   1   8  123.46    5.95
   6  -1   8  122.30    6.19
  -6   1   8  112.10    5.59
   7   1  -8  195.19    8.72
   7  -1  -8  197.70    7.28
  -7   1  -8  215.40    7.96
  -7  -1  -8  193.77    7.61
   7   1   8  207.33    8.70
   7  -1   8  219.18    7.84
   7   1  -8  207.60    7.47
  -7   1   8  209.13    8.63
   8   1  -8   73.79    5.57
   8  -1  -8   78.13    5.52
  -8   1  -8   80.62    5.36
  -8  -1  -8   72.05    6.63
   8   1   8   84.58    5.63
   8  -1   8   81.56    5.28
   8   1  -8   73.74    4.59
  -8   1   8   72.95    9.04
  -8  -1   8   77.12    5.02
   9   1  -8   30.77    9.69
   9  -1  -8   30.83    3.64
  -9   1  -8   28.74    5.89
  -9  -1  -8   23.98    3.25
   9   1   8   27.01    3.57
   9  -1   8   32.76    3.74
   9   1  -8   28.90    3.03
  -9   1   8   31.39    8.32
  -9  -1   8   32.38    3.41
  10   1  -8   79.43    6.20
  10  -1  -8   77.92    5.20
 -10   1  -8   66.37    4.78
 -10  -1  -8   77.82    8.53
  10   1   8   73.64    7.03
  10  -1   8   74.23    5.19
  10   1  -8   77.35    5.30
 -10   1   8   75.22    5.57
 -10  -1   8   75.00    4.65
  11   1  -8   83.21    6.58
  11  -1  -8   85.20    5.83
 -11   1  -8   89.12    6.27
 -11  -1  -8   87.97    9.32
  11   1   8   85.65    6.25
  11  -1   8   86.48    6.37
  11   1  -8   75.60    7.30
  11  -1  -8   86.16    7.11
 -11   1   8   94.22   12.27
 -11  -1   8   82.46    6.35
  12   1  -8    9.08    2.78
  12  -1  -8   13.05    2.93
 -12   1  -8    6.85    2.39
 -12  -1  -8    8.26    2.41
  12   1   8    9.23    3.12
  12  -1   8    7.54    2.48
  12   1  -8    6.39    2.48
  12  -1  -8    7.31    2.47
 -12   1   8   10.25    3.15
 -12  -1   8    8.78    2.26
  13   1  -8   38.70    7.83
  13  -1  -8   40.92    4.19
 -13   1  -8   42.05    8.75
 -13  -1  -8   46.44    4.35
  13   1   8   39.46    4.37
  13  -1   8   43.55    5.08
  13   1  -8   39.97    4.29
  13  -1  -8   42.96    4.55
 -13   1   8   43.35    4.95
 -13  -1   8   43.76    4.32
  14   1  -8    1.79    3.20
 -14   1  -8    0.65    2.21
 -14  -1  -8    2.16    2.16
  14   1   8    2.03    2.98
  14  -1   8    1.92    2.36
  14   1  -8    1.05    1.61
  14  -1  -8    3.88    3.74
 -14   1   8    0.36    1.73
 -14  -1   8    1.38    2.09
  15   1  -8   18.43    7.17
  15  -1  -8   19.61    3.23
 -15   1  -8   23.94    4.94
 -15  -1  -8   26.67    7.35
  15   1   8   20.68    4.90
  15  -1   8   19.26    9.82
  15   1  -8   23.86    4.77
  15  -1  -8   21.31    3.89
 -15   1   8   24.88    7.24
 -15  -1   8   20.61    7.47
  16   1  -8   21.00    9.24
  16  -1  -8   29.83    4.90
 -16   1  -8   25.16    3.47
 -16  -1  -8   28.81    7.15
  16   1   8   26.70    7.14
  16  -1   8   27.49    8.84
  16   1  -8   22.94    6.32
  16  -1  -8   23.98    7.11
 -16   1   8   32.04    9.95
 -16  -1   8   21.35   10.14
  17   1  -8    2.91    2.64
  17  -1  -8    3.57    2.58
 -17   1  -8    3.68    3.10
 -17  -1  -8    4.59    3.60
  17   1   8    4.72    3.81
  17  -1   8    2.83    2.89
  17   1  -8    1.60    2.26
  17  -1  -8    2.57    2.28
 -17   1   8    5.16    4.29
 -17  -1   8    1.63    3.14
  18   1  -8   25.37   12.42
  18  -1  -8   17.32    8.89
 -18   1  -8   31.04    4.89
 -18  -1  -8   25.85    4.72
  18   1   8   21.15    9.11
  18  -1   8   29.30    5.40
  18   1  -8   19.21    4.64
  18  -1  -8   31.91    6.39
 -18   1   8   26.88    8.49
 -18  -1   8   20.84    8.69
  19  -1  -8   50.81    9.27
  19   1  -8   45.04   17.75
 -19   1  -8   64.49    5.90
 -19  -1  -8   58.21   15.03
  19   1   8   61.54    9.15
  19  -1   8   54.43    8.04
  19   1  -8   57.93    7.13
  19  -1  -8   65.51   10.67
 -19   1   8   58.74   16.69
 -19  -1   8   49.60   15.19
  20   1  -8   38.07   17.61
 -20   1  -8   47.22    5.52
 -20  -1  -8   44.68   11.43
  20   1   8   42.36    8.83
  20  -1   8   33.93   16.50
  20   1  -8   34.18   12.70
  20  -1  -8   45.70   15.50
 -20   1   8   42.54   10.96
  21   1  -8    4.34    3.14
 -21   1  -8    2.98    2.19
 -21  -1  -8    4.09    3.33
  21  -1   8    2.63    3.15
  21   1  -8    3.65    4.04
  21  -1  -8    6.93    4.64
 -21   1   8    2.58    2.89
  22   1  -8   14.71    9.37
 -22  -1  -8   24.36    4.81
  22   1   8   18.34    5.02
  22  -1   8   17.79    8.65
  22  -1  -8   21.45    5.98
 -22   1   8   19.43   11.42
   0   1  -9   76.97    4.81
   0  -1  -9   86.21    5.03
   0   1   9   85.31    5.12
   1   1  -9   72.35    8.00
  -1   1  -9   73.36    4.79
   1  -1  -9   65.33    7.44
  -1  -1  -9   66.47    4.07
  -1   1   9   68.73    7.17
   1  -1   9   71.03    5.24
   1   1   9   73.28    8.58
   2   1  -9   79.59    4.94
  -2   1  -9  100.35   10.94
   2  -1  -9   81.73    5.87
  -2  -1  -9   85.17    5.03
   2  -1   9   80.89    4.67
   2   1   9   80.03    7.73
   3   1  -9  170.50    7.69
   3  -1  -9  168.91    9.39
  -3   1  -9  171.14    6.82
  -3  -1  -9  170.25    7.39
   3  -1   9  170.39    7.85
   3   1   9  154.86    7.23
   4   1  -9  193.60    8.04
   4  -1  -9  195.27    7.35
  -4   1  -9  215.16    8.06
  -4  -1  -9  193.93    7.80
   4   1   9  191.73    7.97
   4  -1   9  193.83    7.91
  -4   1   9  192.43    8.24
   5   1  -9  439.66   18.59
   5  -1  -9  426.80   18.91
  -5   1  -9  443.01   18.71
  -5  -1  -9  469.28   19.32
   5   1   9  493.38   20.43
   5  -1   9  513.50   21.33
  -5   1   9  449.06   19.03
   6   1  -9    4.98    1.90
   6  -1  -9    4.74    1.77
  -6   1  -9    5.49    1.83
  -6  -1  -9    4.62    1.59
   6   1   9    6.25    2.97
   6  -1   9    5.20    1.64
  -6   1   9    6.54    2.60
   7   1  -9   25.71    3.61
   7  -1  -9   26.21    3.49
  -7   1  -9   28.83    3.40
  -7  -1  -9   28.34    3.82
   7   1   9   24.40    7.16
   7  -1   9   24.12    6.24
  -7   1   9   28.99    3.74
   8   1  -9  125.47    7.24
   8  -1  -9  115.97    6.11
  -8   1  -9  132.44   10.24
  -8  -1  -9  130.77    6.56
   8   1   9  123.81    6.81
   8  -1   9  123.12    5.74
   8   1  -9  117.63    5.16
  -8   1   9  120.78    9.41
  -8  -1   9  106.47    5.65
   9   1  -9   89.65    7.24
   9  -1  -9   86.42    6.35
  -9   1  -9   78.03    6.03
  -9  -1  -9   77.18    4.93
   9   1   9   86.14   13.60
   9  -1   9   88.15    5.76
   9   1  -9   80.46    7.47
  -9   1   9   86.43    6.33
  -9  -1   9   82.49    5.65
  10   1  -9  352.38   16.28
  10  -1  -9  330.50   14.72
 -10   1  -9  362.18   15.45
 -10  -1  -9  350.70   15.61
  10   1   9  355.60   16.27
  10  -1   9  362.42   15.70
  10   1  -9  382.27   16.38
 -10   1   9  355.54   16.33
 -10  -1   9  359.93   15.69
  11   1  -9   35.77    5.27
  11  -1  -9   31.91    4.08
 -11   1  -9   33.19    6.76
 -11  -1  -9   29.02    4.39
  11   1   9   32.79    4.74
  11  -1   9   34.83    4.31
  11   1  -9   32.00    4.86
 -11   1   9   33.95    8.04
 -11  -1   9   34.22    4.04
  12   1  -9    8.10    2.79
 -12   1  -9    6.97    2.27
 -12  -1  -9    8.44    2.27
  12   1   9   12.42    3.69
  12  -1   9    8.54    3.62
  12   1  -9    9.20    4.73
  12  -1  -9   13.47    3.11
 -12   1   9    9.72    3.33
 -12  -1   9    8.19    3.31
  13   1  -9   38.57   11.12
  13  -1  -9   37.34    5.21
 -13   1  -9   38.48    9.12
 -13  -1  -9   36.58    4.04
  13   1   9   40.23    5.09
  13  -1   9   32.02   10.82
  13   1  -9   34.42    4.79
  13  -1  -9   37.51    5.59
 -13   1   9   45.38    5.76
 -13  -1   9   40.84    9.95
  14   1  -9  429.45   22.72
  14  -1  -9  424.03   21.75
 -14   1  -9  466.50   23.34
 -14  -1  -9  463.47   23.54
  14   1   9  454.54   23.91
  14  -1   9  441.58   22.81
  14   1  -9  416.78   21.28
  14  -1  -9  483.69   24.88
 -14   1   9  451.41   23.49
 -14  -1   9  470.56   23.82
  15   1  -9    2.31    3.13
  15  -1  -9    3.38    2.79
 -15   1  -9    0.34    0.96
 -15  -1  -9    1.11    1.73
  15   1   9    0.80    2.43
  15  -1   9    0.21    1.98
  15   1  -9    0.69    1.58
  15  -1  -9    2.94    3.01
 -15   1   9    2.61    2.90
 -15  -1   9    1.17    2.24
  16   1  -9    6.72    3.23
  16  -1  -9    4.74    2.12
 -16   1  -9    4.11    1.89
 -16  -1  -9    5.18    2.96
  16   1   9    3.30    2.37
  16  -1   9    5.79    2.91
  16   1  -9    4.32    3.29
  16  -1  -9    7.25    4.32
 -16   1   9    5.82    3.05
 -16  -1   9    7.26    2.89
  17   1  -9   44.64   16.85
  17  -1  -9   46.05   13.58
 -17   1  -9   52.70    6.49
 -17  -1  -9   47.04    9.40
  17   1   9   39.49   13.68
  17  -1   9   45.70    7.80
  17   1  -9   41.60    6.60
  17  -1  -9   49.42   10.68
 -17   1   9   53.76   15.92
 -17  -1   9   38.72   11.11
  18   1  -9   36.57   15.90
  18  -1  -9   41.40   15.71
 -18   1  -9   42.32   11.22
 -18  -1  -9   49.27   14.95
  18   1   9   51.11    6.34
  18  -1   9   51.39    6.05
  18   1  -9   50.26    6.45
  18  -1  -9   53.67    6.84
 -18   1   9   64.94   17.14
 -18  -1   9   51.25   11.10
  19   1  -9   28.93   13.53
 -19   1  -9   29.08   12.34
 -19  -1  -9   34.45    5.10
  19   1   9   25.43   10.56
  19  -1   9   32.23    5.52
  19   1  -9   27.88    6.62
  19  -1  -9   35.90    6.74
 -19   1   9   39.54   12.93
  20   1  -9   61.15   20.26
 -20   1  -9   55.83   15.82
 -20  -1  -9   74.99   12.16
  20   1   9   63.56   13.77
  20  -1   9   78.40    8.20
  20   1  -9   71.26    7.56
  20  -1  -9   83.56   13.24
 -20   1   9   68.03   16.95
  21   1  -9   21.49   12.67
 -21   1  -9   33.73    5.56
 -21  -1  -9   31.36    8.71
  21  -1   9   32.36    6.96
  21   1  -9   30.39    6.10
  21  -1  -9   22.22    9.03
 -21   1   9   24.19   12.80
   0   1 -10    1.13    2.43
   0  -1 -10   -0.23    1.39
   0   1  10   -0.79    1.27
   1   1 -10  132.53    8.90
  -1   1 -10  160.12    8.74
   1  -1 -10  143.61    7.75
  -1  -1 -10  163.51   11.11
  -1   1  10  153.00    9.26
   1  -1  10  148.41    7.83
   1   1  10  158.92    8.75
   2   1 -10   39.25    4.91
  -2   1 -10   39.61    8.49
   2  -1 -10   45.48    9.34
  -2  -1 -10   29.97    3.79
   2  -1  10   34.66    6.31
   2   1  10   37.61    6.80
   3   1 -10   11.69    3.66
   3  -1 -10   11.64    4.34
  -3   1 -10   17.27    5.41
  -3  -1 -10   13.40    2.93
   3  -1  10   10.23    2.96
   3   1  10   10.88    3.98
   4   1 -10   16.34    4.26
   4  -1 -10   16.30    3.29
  -4   1 -10   16.53    3.14
  -4  -1 -10   16.92    3.89
   4  -1  10   13.14    4.91
   4   1  10   14.75    6.44
  -4   1  10   13.60    3.16
   5   1 -10   12.00    3.29
   5  -1 -10   15.08    6.07
  -5   1 -10   10.02    2.85
  -5  -1 -10   12.83    3.21
   5   1  10   12.60    4.96
   5  -1  10   13.40    4.54
  -5   1  10   11.78    3.41
   6   1 -10   12.77    3.46
   6  -1 -10   10.61    2.77
  -6   1 -10   10.46    2.39
  -6  -1 -10   10.54    3.65
   6   1  10   10.27    3.53
   6  -1  10   10.89    4.03
  -6   1  10   15.49    5.08
   7   1 -10  177.20   10.43
   7  -1 -10  163.84    8.88
  -7   1 -10  188.24   16.29
  -7  -1 -10  174.04    9.75
   7   1  10  173.27   10.29
   7  -1  10  184.34   11.82
  -7   1  10  181.80    9.98
   8   1 -10   54.28    6.13
   8  -1 -10   46.62    4.60
  -8   1 -10   51.77   10.19
  -8  -1 -10   47.42    7.70
   8   1  10   43.15    8.70
   8  -1  10   43.47    8.62
   8   1 -10   48.67    3.74
  -8   1  10   53.19    5.05
   9   1 -10   97.88    8.64
   9  -1 -10   97.73    7.88
  -9   1 -10   95.81    7.59
  -9  -1 -10   96.10    8.97
   9   1  10  103.68    8.44
   9  -1  10  103.92    7.35
   9   1 -10   95.19    8.98
  -9   1  10   95.29   10.33
  -9  -1  10   88.47    6.77
  10   1 -10   65.26   10.97
  10  -1 -10   60.12    5.61
 -10   1 -10   66.32    5.15
 -10  -1 -10   58.72    5.13
  10   1  10   46.30    8.68
  10  -1  10   66.63    5.55
  10   1 -10   62.89    5.32
 -10   1  10   69.51    6.52
 -10  -1  10   57.95   12.04
  11   1 -10   25.41    4.73
  11  -1 -10   20.55    5.83
 -11   1 -10   19.28    4.42
 -11  -1 -10   19.44    3.20
  11   1  10   20.91    4.03
  11  -1  10   15.89    5.69
 -11   1  10   22.26    3.86
 -11  -1  10   22.37    3.85
  12   1 -10    1.02    2.10
  12  -1 -10    1.70    1.57
 -12   1 -10    1.19    2.25
 -12  -1 -10    1.28    1.68
  12   1  10    1.89    2.05
  12  -1  10    2.51    2.03
  12   1 -10    3.19    2.26
  12  -1 -10    2.74    1.81
 -12   1  10    3.63    3.49
 -12  -1  10    3.82    2.86
  13   1 -10   18.66    5.78
  13  -1 -10   25.53    4.80
 -13   1 -10   20.84    7.69
 -13  -1 -10   20.38    6.73
  13   1  10   18.45    4.60
  13  -1  10   24.22    4.54
  13   1 -10   18.79    7.04
  13  -1 -10   19.02    5.45
 -13   1  10   25.46    5.45
 -13  -1  10   21.53    4.51
  14   1 -10    2.06    2.95
  14  -1 -10    3.87    3.19
 -14   1 -10    3.54    2.76
 -14  -1 -10   11.22    3.39
  14   1  10    0.91    2.27
  14  -1  10    3.47    3.18
  14   1 -10    0.75    2.20
  14  -1 -10    6.92    4.67
 -14   1  10    1.44    2.01
 -14  -1  10    1.37    2.25
  15   1 -10   10.38    6.29
  15  -1 -10    8.14    6.91
 -15   1 -10    9.87    5.35
 -15  -1 -10   10.88    3.59
  15   1  10   14.47    4.50
  15  -1  10   10.28    6.02
  15   1 -10   14.39    3.78
  15  -1 -10   17.34    4.41
 -15   1  10   17.03    3.85
 -15  -1  10   15.24    3.84
  16   1 -10   32.97   12.62
  16  -1 -10   37.27    8.76
 -16   1 -10   45.12   12.90
 -16  -1 -10   39.08    6.09
  16   1  10   34.77   12.75
  16  -1  10   31.98   12.63
  16   1 -10   32.92    9.78
  16  -1 -10   47.05    7.67
 -16   1  10   41.73   10.66
 -16  -1  10   46.15    6.35
  17   1 -10   34.51   12.81
  17  -1 -10   20.29   13.57
 -17   1 -10   36.37    5.18
 -17  -1 -10   30.42    9.69
  17   1  10   29.71    5.32
  17  -1  10   32.62    6.93
  17   1 -10   32.63    5.67
  17  -1 -10   34.17   13.44
 -17   1  10   36.09   12.04
 -17  -1  10   33.75    5.15
  18   1 -10   48.32   13.53
  18  -1 -10   44.84   17.20
 -18   1 -10   54.34   12.90
 -18  -1 -10   49.65   14.14
  18   1  10   64.29    7.97
  18  -1  10   60.93    6.89
  18   1 -10   63.38    8.10
  18  -1 -10   58.47    9.16
 -18   1  10   67.77   16.87
 -18  -1  10   42.76   14.31
  19   1 -10   11.67    6.31
 -19   1 -10   12.51    6.08
 -19  -1 -10    7.95    3.79
  19   1  10    6.50    3.06
  19  -1  10    9.02    5.43
  19   1 -10    7.73    5.05
  19  -1 -10   16.80    4.42
 -19   1  10   20.36    8.90
  20   1 -10    3.81    3.54
 -20   1 -10    3.02    2.80
 -20  -1 -10    4.39    2.70
  20   1  10    2.20    3.61
  20  -1  10    4.31    3.47
  20   1 -10    4.33    3.95
  20  -1 -10    6.53    4.12
 -20   1  10    4.23    3.80
   0   1 -11   21.99    7.41
   0  -1 -11   17.13    3.74
   0   1  11   16.33    6.19
   1   1 -11   69.90    8.77
  -1   1 -11   64.63    5.11
   1  -1 -11   73.70    5.13
  -1  -1 -11   67.15    4.87
   1  -1  11   73.28    8.27
   1   1  11   74.89   12.60
   2   1 -11    2.55    2.76
  -2   1 -11    4.13    3.42
   2  -1 -11    3.82    2.80
  -2  -1 -11    5.48    2.77
   2  -1  11    4.41    2.25
   2   1  11    2.77    2.29
   3   1 -11  553.65   23.01
   3  -1 -11  529.07   21.82
  -3   1 -11  551.59   22.79
  -3  -1 -11  565.65   23.24
   3  -1  11  560.34   22.53
   3   1  11  534.67   22.24
   4   1 -11   57.72    9.19
   4  -1 -11   53.38    7.62
  -4   1 -11   61.80    4.71
  -4  -1 -11   65.65   10.46
   4  -1  11   63.14   10.16
   4   1  11   64.88   10.28
  -4   1  11   58.28    6.07
   5   1 -11   15.11    3.78
   5  -1 -11   15.91    3.77
  -5   1 -11   16.60    4.56
  -5  -1 -11   14.64    3.42
   5  -1  11   13.27    4.50
   5   1  11   16.40    6.01
  -5   1  11   15.26    3.76
   6   1 -11   10.40    3.36
   6  -1 -11   10.88    2.99
  -6   1 -11    9.93    3.50
  -6  -1 -11    6.73    2.29
   6   1  11    9.77    4.61
   6  -1  11    9.25    3.00
  -6   1  11   11.07    3.57
   7   1 -11  207.01   13.23
   7  -1 -11  205.64   12.79
  -7   1 -11  217.79   17.52
  -7  -1 -11  189.92   11.95
   7   1  11  211.26   14.74
   7  -1  11  202.09   11.86
  -7   1  11  227.95   14.66
   8   1 -11  129.21   10.28
   8  -1 -11  115.69    7.75
  -8   1 -11  128.10   16.16
  -8  -1 -11  118.97   15.00
   8   1  11  117.16    8.37
   8  -1  11  107.49    6.43
   8   1 -11  124.14   10.64
  -8   1  11  131.12    8.50
   9   1 -11   31.78    7.98
   9  -1 -11   31.24    4.69
  -9   1 -11   29.31    3.91
  -9  -1 -11   26.58    3.83
   9   1  11   24.67    8.39
   9   1 -11   30.48    4.94
  -9   1  11   26.70    4.26
  -9  -1  11   28.98    4.21
  10   1 -11   26.99    7.84
  10  -1 -11   21.57    4.16
 -10   1 -11   23.60    3.47
 -10  -1 -11   20.03    3.28
  10   1  11   20.80    8.80
  10  -1  11   23.36    6.87
  10   1 -11   21.88    5.37
 -10   1  11   30.02    8.83
 -10  -1  11   25.99    4.07
  11   1 -11   39.94    6.24
  11  -1 -11   34.30    4.81
 -11   1 -11   32.22    4.22
 -11  -1 -11   28.06    5.64
  11   1  11   29.06   10.09
  11  -1  11   34.72    4.48
  11   1 -11   34.54    7.65
 -11   1  11   33.33    4.63
 -11  -1  11   35.58    4.82
  12   1 -11   49.11    6.89
  12  -1 -11   48.25    5.49
 -12   1 -11   54.71    5.94
 -12  -1 -11   43.18    5.20
  12   1  11   37.74   13.39
  12  -1  11   47.83    5.08
  12   1 -11   48.61    6.86
  12  -1 -11   52.49   11.55
 -12   1  11   53.70   12.50
 -12  -1  11   55.71    5.75
  13   1 -11   33.71    5.53
  13  -1 -11   34.81    4.99
 -13   1 -11   30.70   12.13
 -13  -1 -11   33.96    4.95
  13   1  11   26.74    9.03
  13  -1  11   38.93    5.44
  13   1 -11   29.61    7.65
  13  -1 -11   38.51    5.66
 -13   1  11   38.19    5.58
 -13  -1  11   33.18    7.47
  14   1 -11   19.48    4.74
  14  -1 -11   22.20    4.43
 -14   1 -11   17.43    4.55
 -14  -1 -11   20.71    4.23
  14   1  11   16.99    7.69
  14  -1  11   19.13    7.57
  14   1 -11   18.44    6.07
  14  -1 -11   23.71    7.46
 -14   1  11   25.34    4.85
 -14  -1  11   24.32    4.07
  15   1 -11   23.63    7.34
  15  -1 -11   20.19   11.47
 -15   1 -11   33.03    4.92
 -15  -1 -11   23.50    4.90
  15   1  11   19.33    4.15
  15  -1  11   18.42   11.65
  15   1 -11   27.69    5.60
  15  -1 -11   34.53    5.88
 -15   1  11   36.78    5.58
 -15  -1  11   30.08    4.71
  16   1 -11    3.45    2.50
  16  -1 -11    7.30    3.30
 -16   1 -11    3.31    3.88
 -16  -1 -11    2.44    2.95
  16   1  11    3.05    3.57
  16  -1  11    2.74    2.35
  16   1 -11    0.99    2.35
  16  -1 -11    3.10    2.59
 -16   1  11    2.28    3.23
 -16  -1  11    5.25    3.50
  17  -1 -11    8.36    7.85
 -17   1 -11   16.90    4.37
 -17  -1 -11   13.30    3.45
  17   1  11   10.94    3.51
  17   1 -11   16.92    5.02
  17  -1 -11   20.97    5.09
 -17   1  11   13.08    8.75
 -17  -1  11    9.70    5.69
  18   1 -11    1.31    2.10
  18  -1 -11    4.10    3.60
 -18   1 -11    1.80    2.80
 -18  -1 -11    4.86    3.10
  18   1  11    3.35    3.33
  18   1 -11    5.54    4.71
  18  -1 -11    2.41    3.36
 -18   1  11    5.88    3.41
 -18  -1  11    3.20    2.67
  19   1 -11    2.65    2.42
 -19   1 -11    0.36    1.85
  19   1  11    1.16    3.06
  19  -1  11    1.69    2.71
  19   1 -11    1.16    2.12
 -19   1  11    1.66    2.96
   0   1 -12    2.53    3.49
   0  -1 -12    1.34    2.53
   0   1  12    1.88    2.61
   1   1 -12  212.78   13.38
  -1   1 -12  233.53   14.17
   1  -1 -12  245.63   17.88
  -1  -1 -12  221.60   13.36
   1   1  12  216.06   15.83
   2   1 -12  113.79   14.08
  -2   1 -12  100.15    7.76
   2  -1 -12  105.21    8.25
  -2  -1 -12  103.25    8.13
   2  -1  12  103.66   11.75
   2   1  12  117.88    9.76
   3   1 -12   51.89    5.88
   3  -1 -12   53.27    5.08
  -3   1 -12   52.06    9.65
  -3  -1 -12   60.06    8.27
   3  -1  12   65.33   10.93
   3   1  12   55.13   10.46
   4   1 -12  139.87   13.51
   4  -1 -12  105.87    7.04
  -4   1 -12  148.17   11.64
  -4  -1 -12  146.33    9.62
   4  -1  12  142.24   11.09
   4   1  12  139.52   10.97
  -4   1  12  161.72    9.66
   5   1 -12    2.06    2.66
   5  -1 -12    3.14    2.88
  -5   1 -12    1.91    2.51
  -5  -1 -12    1.38    2.21
   5  -1  12    1.64    0.99
   5   1  12    1.56    1.99
  -5   1  12    1.84    2.23
   6   1 -12   28.41    4.53
   6  -1 -12   33.21   10.49
  -6   1 -12   31.60    3.69
  -6  -1 -12   33.46    4.47
   6   1  12   31.16   10.74
   6  -1  12   31.12    9.08
  -6   1  12   30.39    5.27
   7   1 -12    4.08    1.97
   7  -1 -12    8.95    2.97
  -7   1 -12    7.60    2.93
  -7  -1 -12    6.14    2.45
   7   1  12    7.57    4.63
  -7   1  12    7.24    3.51
   8   1 -12   10.50    3.14
   8  -1 -12    8.52    3.14
  -8   1 -12   12.41    3.01
  -8  -1 -12   10.44    2.33
   8   1  12   10.71    5.10
   8  -1  12   10.56    4.02
  -8   1  12   16.58    7.17
   9   1 -12    1.08    2.74
   9  -1 -12    1.93    2.37
  -9   1 -12    2.13    2.14
  -9  -1 -12    1.82    2.53
   9   1  12    2.31    3.27
   9  -1  12    1.30    1.59
   9   1 -12    0.50    1.91
  -9   1  12    1.35    2.70
  -9  -1  12    1.72    2.60
  10   1 -12   19.08    4.97
  10  -1 -12   11.53    8.38
 -10   1 -12   17.93    6.47
 -10  -1 -12   18.59    4.64
  10   1  12   20.20    7.57
  10  -1  12   13.50    5.59
  10   1 -12   18.15    7.28
 -10   1  12   17.11    6.59
 -10  -1  12   16.25    5.80
  11   1 -12   22.21    7.35
  11  -1 -12   23.68    4.75
 -11  -1 -12   24.93    6.52
  11   1  12   18.00    7.09
  11  -1  12   13.90    6.13
  11   1 -12   22.84    3.95
 -11   1  12   22.27    4.91
 -11  -1  12   15.95    8.98
  12   1 -12    0.99    2.04
  12  -1 -12    2.38    2.77
 -12   1 -12    3.50    3.48
 -12  -1 -12    1.95    1.91
  12   1  12    1.85    2.43
  12  -1  12    0.72    1.14
  12   1 -12    1.66    1.54
  12  -1 -12    2.79    2.72
 -12   1  12    2.56    3.19
 -12  -1  12    2.66    2.40
  13   1 -12    7.02    3.48
  13  -1 -12    2.48    2.64
 -13   1 -12    5.76    2.62
 -13  -1 -12    5.40    2.40
  13   1  12    4.80    2.73
  13  -1  12    4.42    2.69
  13   1 -12    2.86    3.11
  13  -1 -12    4.12    2.07
 -13   1  12    1.84    2.02
 -13  -1  12    4.88    3.47
  14   1 -12    1.11    1.97
  14  -1 -12    2.05    2.20
 -14   1 -12    2.07    2.40
 -14  -1 -12    1.04    1.90
  14   1  12    2.58    3.34
  14  -1  12    2.58    2.88
  14   1 -12    1.79    2.56
  14  -1 -12   -0.38    2.00
 -14   1  12    1.61    2.66
 -14  -1  12    2.86    3.01
  15   1 -12    3.76    2.17
  15  -1 -12    3.42    2.42
 -15  -1 -12    4.80    3.04
  15   1  12    3.69    3.09
  15  -1  12    4.84    3.45
  15   1 -12    4.80    2.34
  15  -1 -12    5.50    2.65
 -15   1  12    4.54    2.51
 -15  -1  12    5.76    5.14
  16   1 -12   15.29    6.27
  16  -1 -12    9.84    6.97
 -16   1 -12   19.18    4.12
 -16  -1 -12   13.63    5.97
  16   1  12   12.90    5.95
  16  -1  12   10.93    3.87
  16   1 -12    9.76    3.09
  16  -1 -12   16.30    5.00
 -16   1  12   23.15    5.23
 -16  -1  12   15.08    4.34
  17   1 -12    9.16    4.40
 -17   1 -12   15.73    4.48
 -17  -1 -12   12.86    3.69
  17   1  12    9.19    5.80
  17  -1  12    7.36    2.61
  17   1 -12    6.81    4.38
  17  -1 -12    7.10    5.68
 -17   1  12    8.93    6.26
 -17  -1  12    6.69    5.98
  18   1 -12   12.70   11.90
 -18   1 -12   17.26    8.92
 -18  -1 -12   17.53    4.45
  18   1  12   18.04    6.60
  18  -1  12   13.35    8.65
  18   1 -12   18.90    4.47
  18  -1 -12   23.39    6.42
 -18   1  12   22.42    8.63
   0   1 -13  401.55   21.88
  -1   1 -13   32.90    9.10
   1  -1 -13   37.86   10.95
  -1  -1 -13   37.75   12.44
   1   1  13   36.43    9.46
   2   1 -13   66.46   13.55
  -2   1 -13   66.47    6.56
   2  -1 -13   67.38    6.92
  -2  -1 -13   52.00    5.87
   2  -1  13   58.86   11.11
   2   1  13   60.54    9.37
   3   1 -13  165.38   11.71
   3  -1 -13  162.17   10.67
  -3   1 -13  155.04   10.29
  -3  -1 -13  155.91   12.80
   3   1  13  172.57   11.84
   4   1 -13   83.47    7.54
   4  -1 -13   92.52   15.20
  -4   1 -13   90.06   10.71
  -4  -1 -13   84.54    7.44
   4   1  13   82.26   16.66
  -4   1  13  100.00    8.53
   5   1 -13    2.78    2.86
   5  -1 -13    4.41    3.67
  -5   1 -13    3.31    3.50
  -5  -1 -13    4.16    2.82
   5  -1  13    2.58    1.63
   5   1  13    1.91    2.27
  -5   1  13    4.93    3.50
   6   1 -13  206.22   11.54
   6  -1 -13  207.86   10.82
  -6   1 -13  220.70   10.47
  -6  -1 -13  214.09   10.77
   6  -1  13  191.57   10.35
   6   1  13  186.16   10.78
  -6   1  13  218.12   11.30
   7   1 -13   41.57    6.81
   7  -1 -13   34.33    8.57
  -7   1 -13   35.93    4.78
  -7  -1 -13   35.10    4.61
   7  -1  13   28.57   10.74
   7   1  13   39.10   12.56
  -7   1  13   38.98   11.43
   8   1 -13    3.79    3.49
   8  -1 -13    2.38    2.56
  -8   1 -13    1.74    2.32
  -8  -1 -13    0.65    1.87
   8  -1  13    1.81    1.80
  -8   1  13    2.00    2.97
  -8  -1  13    1.75    2.61
   9   1 -13    5.80    3.63
   9  -1 -13    3.29    2.34
  -9   1 -13    3.89    2.78
  -9  -1 -13    3.54    2.68
   9   1  13    2.01    2.20
   9  -1  13    3.80    2.33
   9   1 -13    4.12    2.99
  -9   1  13    5.74    3.35
  -9  -1  13    2.69    3.10
  10   1 -13   35.16    6.03
  10  -1 -13   33.08    5.42
 -10   1 -13   30.64    9.06
 -10  -1 -13   29.94    4.66
  10   1  13   31.61    7.64
  10  -1  13   21.93    6.83
  10   1 -13   29.83    6.30
 -10   1  13   30.34   12.78
 -10  -1  13   31.54    9.33
  11   1 -13   21.48    7.15
  11  -1 -13   25.19    5.04
 -11   1 -13   23.31    9.04
 -11  -1 -13   22.82    7.55
  11   1  13   21.67   12.32
  11  -1  13   18.57    8.63
  11   1 -13   31.20    5.42
 -11   1  13   27.81   11.65
 -11  -1  13   25.98   11.57
  12   1 -13   59.23    7.43
  12  -1 -13   52.11    6.22
 -12   1 -13   50.87   14.00
 -12  -1 -13   53.23    6.06
  12   1  13   43.68   10.44
  12  -1  13   31.28    3.85
  12   1 -13   53.54    5.58
  12  -1 -13   53.85   13.35
 -12   1  13   60.89    7.10
 -12  -1  13   55.53    9.24
  13   1 -13   25.65    5.61
  13  -1 -13   18.83    8.43
 -13   1 -13   22.04    4.38
 -13  -1 -13   19.28    6.91
  13   1  13   18.82    8.90
  13   1 -13   20.99    3.68
  13  -1 -13   25.07    7.39
 -13   1  13   30.17    5.48
 -13  -1  13   22.01    7.58
  14   1 -13    6.71    3.72
  14  -1 -13    2.60    2.33
 -14   1 -13    6.55    3.40
 -14  -1 -13    6.42    2.81
  14   1  13    5.58    2.99
  14  -1  13    7.39    4.85
  14   1 -13    3.75    2.10
  14  -1 -13    4.71    2.37
 -14   1  13    6.97    3.75
  15  -1 -13    5.07    2.78
 -15   1 -13    4.13    2.38
 -15  -1 -13    4.83    3.64
  15   1  13    3.61    3.08
  15  -1  13    3.78    2.13
  15   1 -13    3.88    2.13
  15  -1 -13    3.69    2.45
 -15   1  13   11.53    4.52
 -15  -1  13    7.28    3.28
  16   1 -13   10.81    8.32
 -16   1 -13   21.51    5.38
 -16  -1 -13   20.10    5.11
  16   1  13   14.99    6.20
  16  -1  13    9.27    5.97
  16   1 -13   17.71    4.51
  16  -1 -13   18.01    5.21
 -16   1  13   22.94    6.69
 -16  -1  13   11.88    8.54
   0   1 -14    5.42    4.08
   0  -1 -14    3.18    3.15
   1   1 -14    3.77    3.63
  -1   1 -14    1.55    2.73
   1  -1 -14    2.42    2.56
  -1  -1 -14   -0.20    1.85
   1   1  14    1.36    2.46
   2   1 -14   20.88    4.39
  -2   1 -14   18.31    4.50
   2  -1 -14   20.03    4.61
  -2  -1 -14   18.67    6.73
   2   1  14   16.74    8.08
   3   1 -14    9.04    4.53
   3  -1 -14    3.98    2.35
  -3   1 -14    5.83    2.61
  -3  -1 -14    6.17    2.58
   3  -1  14    4.85    3.36
   3   1  14    7.18    3.92
   4   1 -14  161.76   11.06
   4  -1 -14  151.08   10.05
  -4   1 -14  153.14   12.99
  -4  -1 -14  154.08    9.94
   4  -1  14  150.56   11.41
   4   1  14  160.69   12.27
  -4   1  14  174.58   11.20
   5   1 -14    4.51    4.19
   5  -1 -14    0.11    1.64
  -5   1 -14    0.55    2.13
  -5  -1 -14    3.64    3.11
   5  -1  14    0.99    1.59
   5   1  14   -0.12    1.59
  -5   1  14    3.79    3.52
   6   1 -14  106.49    9.97
   6  -1 -14  100.20    9.25
  -6   1 -14  115.52   14.46
  -6  -1 -14   96.46   16.85
   6  -1  14   94.28    9.13
   6   1  14   96.09   15.01
   7   1 -14    1.70    2.03
   7  -1 -14    3.71    3.05
  -7   1 -14    2.41    1.83
  -7  -1 -14    7.40    4.16
   7  -1  14    2.72    1.84
   7   1  14    6.78    2.54
  -7   1  14    3.43    3.31
   8   1 -14    5.93    3.97
   8  -1 -14    3.85    3.29
  -8   1 -14   -0.82    1.69
  -8  -1 -14    2.41    2.68
   8  -1  14    0.22    0.77
   8   1  14    2.28    2.31
  -8   1  14    0.12    2.02
  -8  -1  14    0.79    2.23
   9   1 -14    2.60    3.38
   9  -1 -14    2.66    2.73
  -9   1 -14    1.80    2.80
  -9  -1 -14    2.79    2.35
   9  -1  14    1.47    1.52
   9   1  14    1.62    2.21
   9   1 -14    1.17    1.18
  -9   1  14    1.40    2.84
  -9  -1  14    2.55    3.01
  10   1 -14    3.39    3.23
  10  -1 -14    3.21    2.25
 -10   1 -14    1.11    1.90
 -10  -1 -14    2.14    2.43
  10   1  14    1.36    2.61
  10  -1  14    0.35    1.68
  10   1 -14   -0.09    1.04
 -10   1  14    2.89    3.72
 -10  -1  14    2.77    2.80
  11   1 -14   20.75    4.72
  11  -1 -14   26.22    5.16
 -11   1 -14   23.36    5.91
  11   1  14   15.96    7.71
  11  -1  14   17.21    8.40
  11   1 -14   23.15    3.93
 -11   1  14   23.36    4.83
 -11  -1  14   14.13   11.40
  12   1 -14   14.39    5.11
  12  -1 -14    9.28    4.03
 -12   1 -14    6.35    2.63
 -12  -1 -14   10.42    4.30
  12   1  14    8.97    3.71
  12  -1  14    6.34    4.21
  12   1 -14    5.23    2.51
  12  -1 -14    8.40    4.25
 -12   1  14    8.12    5.11
 -12  -1  14    8.38    4.31
  13   1 -14    0.77    1.99
  13  -1 -14    1.74    1.85
 -13  -1 -14    1.64    3.06
  13   1  14    5.08    3.58
  13   1 -14    2.87    2.67
  13  -1 -14    2.32    1.70
 -13   1  14    4.40    3.73
 -13  -1  14    2.61    2.82
  14   1 -14    4.61    3.95
  14  -1 -14    7.64    3.29
 -14   1 -14    2.99    2.49
 -14  -1 -14    2.99    3.06
  14   1  14    4.78    4.84
  14   1 -14    3.66    2.17
  14  -1 -14    5.40    2.50
 -14   1  14    6.72    4.15
 -14  -1  14    5.91    4.80
  15   1 -14    6.07    3.43
  15  -1 -14    6.82    4.11
 -15   1 -14    8.88    3.18
 -15  -1 -14    7.24    4.76
  15  -1  14    5.53    3.57
  15   1 -14    5.57    2.69
 -15   1  14    5.25    6.52
 -15  -1  14    7.95    3.75
   0   1 -15   87.09   14.62
   0  -1 -15   95.94   10.15
   1   1 -15   23.26    5.74
  -1   1 -15   16.83    7.33
   1  -1 -15   22.06    5.36
  -1  -1 -15   21.51    5.30
   2   1 -15   27.89    5.95
  -2   1 -15   31.67    5.86
   2  -1 -15   26.34   11.22
  -2  -1 -15   35.20    6.12
   2   1  15   27.36    7.44
   3   1 -15   27.85    5.83
   3  -1 -15   21.68    6.56
  -3   1 -15   22.63    4.72
  -3  -1 -15   21.14    9.62
   3   1  15   21.24   10.17
  -3   1  15   24.14    5.65
   4   1 -15   32.04    6.28
   4  -1 -15   30.74    4.79
  -4   1 -15   21.87    4.44
  -4  -1 -15   22.39   11.30
   4  -1  15   14.69    7.63
   4   1  15   22.48    8.72
  -4   1  15   28.59    6.72
   5   1 -15    2.32    3.28
   5  -1 -15    0.52    1.44
  -5   1 -15    0.27    1.60
  -5  -1 -15    0.44    1.90
   5  -1  15    0.98    1.24
   5   1  15    2.26    4.51
  -5   1  15    0.58    2.27
   6   1 -15  176.20   12.08
   6  -1 -15  178.21   12.00
  -6   1 -15  187.40   11.92
  -6  -1 -15  162.08   17.29
   6   1  15  179.44   14.15
  -6   1  15  214.58   13.94
   7   1 -15   13.36    3.71
   7  -1 -15   11.81    3.18
  -7   1 -15   10.71    3.68
  -7  -1 -15   12.88    5.16
   7   1  15    9.82    6.75
  -7   1  15   18.92    5.43
   8   1 -15    9.16    3.80
   8  -1 -15    4.94    3.09
  -8   1 -15   13.51    4.86
  -8  -1 -15    6.10    4.71
   8   1  15    8.83    3.51
  -8   1  15   12.15    4.31
  -8  -1  15    9.18    4.58
   9   1 -15   13.76    8.23
   9  -1 -15    9.54    3.53
  -9   1 -15   10.81    3.63
  -9  -1 -15    9.64    3.31
   9   1  15    9.12    5.63
  -9   1  15   16.02    4.99
  -9  -1  15   11.12    5.86
  10   1 -15  119.60   10.78
  10  -1 -15  109.45   10.03
 -10   1 -15  100.70   13.51
 -10  -1 -15  100.25    8.79
  10   1  15   98.04   17.12
 -10   1  15  118.56   11.56
 -10  -1  15  108.42   10.82
  11   1 -15   24.04    6.59
  11  -1 -15   22.18    5.37
 -11   1 -15   22.80    4.81
 -11  -1 -15   19.73    5.13
  11   1  15   16.41    8.93
 -11   1  15   25.24    5.45
 -11  -1  15   23.98    5.39
  12   1 -15   32.20    7.62
  12  -1 -15   16.42    9.90
 -12   1 -15   15.63    5.66
 -12  -1 -15   20.57    5.24
  12   1  15   15.65    8.66
  12  -1 -15   17.60   13.06
 -12   1  15   18.26   11.68
 -12  -1  15   18.78   10.70
  13   1 -15   22.79    6.05
  13  -1 -15   29.36    6.18
 -13   1 -15   21.29    7.33
 -13  -1 -15   21.34   11.68
  13   1  15   18.53   12.27
  13  -1 -15   23.09    4.85
 -13   1  15   31.88    8.47
 -13  -1  15   20.48   13.69
   0   1 -16    0.48    1.68
   0  -1 -16    3.27    2.56
   1   1 -16   12.87    4.26
  -1   1 -16   11.42    3.72
   1  -1 -16   11.06    6.31
  -1  -1 -16   13.02    5.29
   2   1 -16   34.22    5.94
  -2   1 -16   31.40    8.21
   2  -1 -16   34.36    7.37
  -2  -1 -16   40.44    6.32
   3   1 -16   21.30    4.99
   3  -1 -16   22.08    4.77
  -3   1 -16   15.23    9.12
  -3  -1 -16   17.08    4.72
  -3   1  16   13.67    6.77
   4   1 -16   85.46    9.47
   4  -1 -16   74.39   13.50
  -4   1 -16   70.33    8.09
  -4  -1 -16   79.18    8.54
   4   1  16   69.13   12.76
  -4   1  16   94.22    9.22
   5   1 -16   42.91    7.63
   5  -1 -16   37.80    5.85
  -5   1 -16   35.95    6.43
  -5  -1 -16   38.76    6.25
   5   1  16   27.75   11.20
  -5   1  16   24.26   17.48
   6   1 -16   65.34    7.87
   6  -1 -16   55.82   10.55
  -6   1 -16   47.97    6.52
  -6  -1 -16   51.43    9.09
   6   1  16   48.59   12.95
  -6   1  16   61.07   14.68
   7   1 -16   15.41    8.35
   7  -1 -16   13.92    4.79
  -7   1 -16   16.77    5.10
  -7  -1 -16   14.52    4.30
   7   1  16    9.83    6.01
  -7   1  16   14.82    4.30
  -7  -1  16   15.69    3.87
   8   1 -16    2.00    2.99
   8  -1 -16    1.32    2.78
  -8   1 -16    3.74    2.81
  -8  -1 -16    5.78    3.50
   8   1  16    0.43    1.28
  -8   1  16    3.04    4.19
  -8  -1  16    2.24    2.93
   9   1 -16    3.56    3.91
   9  -1 -16    1.53    1.98
   9   1  16    4.52    2.92
  -9   1  16    5.07    3.78
  -9  -1  16    5.85    3.80
  10   1 -16    2.68    3.30
  10  -1 -16    7.80    3.89
 -10   1 -16    4.44    4.49
 -10  -1 -16    3.29    4.00
  10   1  16    1.45    1.60
 -10   1  16    2.48    4.01
 -10  -1  16    1.55    2.97
   0   1 -17   16.30    9.47
   0  -1 -17   21.39    6.94
   1   1 -17   12.55    5.30
  -1   1 -17   11.99    5.02
   1  -1 -17    9.38    6.12
  -1  -1 -17   14.56    4.73
   2   1 -17   67.78   10.65
  -2   1 -17   66.16    9.64
   2  -1 -17   67.98    9.81
  -2  -1 -17   71.60   10.25
  -2   1  17   69.84   16.62
   3   1 -17  162.21   19.44
   3  -1 -17  149.40   22.51
  -3  -1 -17  146.24   21.88
  -3   1  17  173.81   21.22
   4   1 -17    6.35    3.77
   4  -1 -17    2.30    3.17
  -4   1 -17    6.84    4.45
  -4  -1 -17    5.94    3.79
   4   1  17    5.17    2.87
  -4   1  17    4.73    4.89
   5   1 -17    1.75    2.06
   5  -1 -17    3.40    3.53
  -5   1 -17    1.82    2.96
  -5  -1 -17    1.95    3.46
  -5   1  17    2.26    3.09
   6   1 -17    1.95    4.31
   6  -1 -17    3.28    4.02
  -6   1 -17    2.66    3.14
  -6  -1 -17    1.81    2.83
   6   1  17    2.59    2.28
  -6   1  17    4.50    4.43
   0   2   0   39.30    2.95
   0   2   0   41.59    3.19
   0   2   0   34.23    2.54
   1   2   0   -0.27    1.17
  -1   2   0    0.69    1.05
   1  -2   0    0.74    0.74
   1   2   0    0.33    0.54
   1   2   0    0.37    0.77
  -1   2   0    0.68    1.02
  -1  -2   0    0.46    0.56
   2   2   0  121.79    8.13
  -2   2   0  122.31    3.20
   2   2   0  114.06    7.03
   2   2   0  122.17    3.18
  -2   2   0  125.34    5.25
  -2  -2   0  117.94    7.19
  -3   2   0    0.36    0.37
   3   2   0    0.07    1.37
   3   2   0    0.42    0.64
  -3   2   0   -0.62    1.39
   4   2   0  284.97    6.99
   4   2   0  276.99    5.74
  -4   2   0  296.32    8.20
  -4  -2   0  295.25    1.91
   5   2   0    1.36    2.02
   5   2   0   -0.07    1.24
   5  -2   0    1.49    1.46
  -5   2   0   -0.36    1.75
   6   2   0  385.77    9.83
   6   2   0  380.12    6.49
   6  -2   0  415.41    5.90
  -6   2   0  400.12    7.43
   7   2   0   -0.14    1.81
  -7   2   0    0.41    0.41
  -7   2   0    0.16    0.26
   7   2   0   -0.45    1.35
   7  -2   0    0.31    2.07
  -7   2   0    0.90    1.05
   8   2   0 1391.40   27.38
  -8   2   0 1322.59   22.38
   8   2   0 1293.07   24.93
   8  -2   0 1425.31   26.45
  -8   2   0 1325.65   26.23
   9   2   0    0.23    1.40
  -9   2   0    0.20    0.43
  -9   2   0   -0.18    0.59
   9   2   0    1.19    1.27
   9  -2   0    0.68    1.90
  -9   2   0    0.96    1.30
  10   2   0 3592.18   26.52
 -10   2   0 3766.21   13.13
  10  -2   0 3726.78   21.74
  11   2   0    1.30    1.31
 -11   2   0   -0.07    0.43
  11   2   0    0.29    1.93
  11  -2   0    2.43    2.25
 -11   2   0   -1.01    1.66
  12   2   0    1.00    1.17
 -12   2   0    0.14    0.43
  12   2   0    1.21    1.83
  12  -2   0    0.89    1.75
 -12   2   0    0.69    1.83
  12   2   0    0.73    0.54
  13   2   0   -0.05    1.27
 -13   2   0    0.99    1.05
  13   2   0    2.08    2.60
  13  -2   0    0.69    2.01
 -13   2   0    0.99    1.25
  14   2   0   63.28   13.24
 -14   2   0   46.35    3.89
  14   2   0   47.35   11.22
  14  -2   0   51.16    4.41
 -14   2   0   58.60    6.67
  15   2   0    2.05    2.00
 -15   2   0    0.85    1.23
  15   2   0    0.03    2.47
  15  -2   0    0.03    2.11
 -15   2   0    1.82    2.59
  16   2   0    6.96    3.36
 -16   2   0    5.29    1.99
  16   2   0    5.10    2.23
  16  -2   0    9.38    3.12
 -16   2   0    7.07    4.81
  17   2   0   -0.06    1.98
 -17   2   0   -0.37    0.71
  17   2   0    4.32    3.44
  17  -2   0    0.69    2.27
  18   2   0   35.60   14.83
  18   2   0   33.70   10.65
  18  -2   0   42.64    6.98
  19   2   0    1.16    1.63
  19   2   0    0.67    2.17
  19  -2   0    0.36    2.32
  20   2   0    3.41    3.13
  20  -2   0    3.55    3.29
  21   2   0   -0.12    2.24
  21  -2   0    0.54    2.27
  22  -2   0  112.72   11.47
 -23  -2   0    0.81    2.49
  23   2   0    1.16    2.62
  23  -2   0    1.56    2.35
 -24  -2   0  157.94   18.59
  24   2   0  174.03   20.88
  24  -2   0  189.77   21.59
   0   2   1   -0.01    0.65
   0   2  -1    1.54    1.75
   0   2  -1   -0.13    0.38
   0   2   1    0.95    1.06
   0  -2   1   -0.01    1.10
   0   2   1    0.46    0.68
   1   2   1  514.95    6.32
   1   2  -1  538.04    6.53
  -1   2  -1  541.02    5.23
   1  -2   1  539.49    4.27
   1   2   1  550.31    6.25
   1   2  -1  523.11    4.41
  -1   2   1  512.93    6.35
   1   2   1  491.77    5.50
   2   2   1  739.99    8.11
   2  -2  -1  694.11    5.27
   2   2  -1  731.97    8.10
   2  -2   1  687.16    4.37
   2  -2  -1  718.64    4.64
  -2   2  -1  727.96    7.52
  -2   2   1  735.75    7.82
   2   2   1  696.15    5.97
  -2  -2  -1  726.28    5.09
   3   2   1 1914.34   13.88
   3  -2  -1 1971.50    6.99
   3   2  -1 1922.28   13.65
  -3   2  -1 1969.76    7.43
   3   2  -1 1960.10   10.31
  -3   2  -1 1983.70   12.78
  -3   2   1 1993.91   13.48
  -3  -2  -1 1960.72    7.06
   4   2   1 3282.42   19.10
   4   2  -1 3237.90   18.71
   4  -2   1 3511.93  197.94
   4   2   1 3562.91  201.34
   4   2  -1 3300.98   14.58
  -4   2  -1 3477.32  196.70
  -4   2   1 3654.71  206.72
   5   2   1    1.14    1.50
   5   2  -1    1.88    2.14
  -5   2  -1    1.55    0.39
   5  -2   1    1.16    0.40
   5   2   1    2.00    1.20
   5   2  -1    2.37    1.82
   5  -2   1    1.54    0.84
  -5   2  -1    0.76    1.27
  -5   2   1    1.55    2.16
   5   2   1    2.01    0.57
   6   2   1   57.91    7.40
   6   2  -1   52.14    6.09
  -6   2  -1   52.04    2.47
   6  -2   1   55.71    3.16
   6   2   1   56.87    6.60
   6   2  -1   56.13    3.82
   6  -2   1   60.97    4.16
  -6   2  -1   52.57    3.98
  -6   2   1   61.02    6.19
  -6  -2   1   49.12    2.24
  -7   2  -1 1072.92   18.58
   7   2   1 1077.13   21.86
   7   2  -1 1112.42   22.47
  -7   2   1  991.84   16.58
  -7   2  -1 1032.69   17.66
   7   2   1 1075.27   20.91
   7   2  -1 1104.97   21.29
   7  -2   1 1054.43   19.72
   7  -2  -1 1075.68   20.29
  -7   2  -1 1086.58   22.17
  -7   2   1 1092.15   22.29
  -7  -2   1 1048.54   17.73
   8   2   1   29.85    6.41
   8   2  -1   31.41    8.00
  -8   2  -1   24.74    2.77
   8   2   1   23.87    3.25
   8   2  -1   25.66    5.93
   8  -2   1   23.65    2.66
   8  -2  -1   25.01    4.56
  -8   2  -1   20.71    3.43
  -8   2   1   24.97    5.67
   8   2   1   18.78    1.44
   9   2   1   24.03    5.57
   9   2  -1   23.87    7.67
  -9   2   1   17.83    1.41
  -9   2  -1   24.81    3.23
   9   2   1   21.44    2.95
   9   2  -1   20.73    3.12
   9  -2   1   25.72    3.77
   9  -2  -1   23.27    2.96
  -9   2  -1   26.21    6.28
  -9  -2   1   19.98    2.36
  -9   2   1   20.04    4.58
   9   2   1   15.83    1.19
  10   2   1   10.41    4.41
  10   2  -1    8.93    3.60
 -10   2  -1    9.43    1.21
  10   2  -1    8.13    2.93
  10  -2   1    9.44    2.08
  10  -2  -1    7.37    1.87
 -10   2  -1   11.18    3.51
 -10   2   1   10.67    3.84
  10   2   1    5.59    1.54
  11   2   1  523.60   18.47
  11   2  -1  613.05   21.26
 -11   2  -1  522.19   15.59
 -11   2   1  506.62   15.15
  11   2   1  522.51   17.88
  11   2  -1  469.98   16.46
  11  -2   1  522.45   18.27
  11  -2  -1  534.04   17.49
 -11   2  -1  520.50   18.04
 -11   2   1  538.06   19.15
  12   2   1   47.63    6.59
  12   2  -1   53.57   13.03
 -12   2  -1   46.39    5.41
 -12   2   1   41.29    3.06
  12   2   1   44.92    4.21
  12   2  -1   46.98    4.55
  12  -2   1   51.07    7.70
  12  -2  -1   45.97    3.46
 -12   2  -1   47.64    5.95
 -12   2   1   50.92    6.94
  13   2   1    1.66    1.17
  13   2  -1    1.11    2.02
 -13   2  -1    0.40    0.64
 -13   2   1    0.98    1.43
  13   2   1    2.36    2.40
  13   2  -1    1.66    3.03
  13  -2   1    0.61    1.85
  13  -2  -1    0.84    1.84
 -13   2   1    1.96    2.58
  14   2   1  363.89   12.53
  14   2  -1  360.65   12.99
 -14   2  -1  332.38    8.83
 -14   2   1  339.93    8.92
  14   2   1  343.05   14.40
  14   2  -1  319.81   12.44
  14  -2   1  376.79   12.25
  14  -2  -1  348.15   11.91
 -14   2   1  333.31   16.99
  15   2   1   54.73   13.78
  15   2  -1   50.68   11.11
 -15   2  -1   47.24    2.89
 -15   2   1   44.64    2.69
  15   2   1   49.51    8.74
  15   2  -1   53.10   11.07
  15  -2   1   62.14    5.54
  15  -2  -1   48.73    7.00
 -15   2   1   56.57    7.95
  16   2   1  208.42   15.35
  16   2  -1  191.73   14.21
 -16   2  -1  183.00   10.68
 -16   2   1  190.58   10.52
  16   2   1  192.41   21.22
  16   2  -1  200.77   14.21
  16  -2   1  206.04   14.81
  16  -2  -1  203.09   13.21
 -16   2   1  229.00   21.32
  17   2  -1   93.05   11.02
 -17   2  -1   87.99    6.15
 -17   2   1   91.77    5.12
  17   2   1   91.57   15.68
  17   2  -1  101.17   10.74
  17  -2   1  103.42    7.77
  17  -2  -1  100.03    7.71
 -17   2   1  108.90   13.70
  18   2  -1    7.65    3.21
 -18  -2  -1    5.00    3.30
  18   2   1    3.86    3.56
  18   2  -1    3.54    2.22
  18  -2   1    6.48    4.24
  18  -2  -1    5.29    3.55
 -18   2   1    3.43    3.50
  19   2  -1  115.32   13.02
 -19  -2  -1  106.39    8.20
  19   2   1  120.87   12.91
  19   2  -1  100.77   15.52
  19  -2   1  117.23   16.93
  19  -2  -1  124.42    9.23
 -19   2   1  107.30   13.06
  20   2  -1    6.85    3.95
 -20  -2  -1    5.93    2.70
  20   2   1    3.53    2.44
  20   2  -1    2.89    3.65
  20  -2   1    6.74    3.79
  20  -2  -1    4.60    2.67
  21   2  -1    3.03    3.70
 -21  -2  -1    5.53    2.68
  21   2   1    5.44    3.69
  21   2  -1    9.70    4.01
  21  -2   1    4.95    3.68
  22   2  -1  169.84   13.09
 -22  -2  -1  157.41   10.23
  22   2   1  186.72   12.15
  22   2  -1  179.74   12.95
  22  -2   1  168.65   12.39
  22  -2  -1  179.79   12.62
 -23  -2  -1    9.45    3.53
  23   2   1    9.26    3.95
  23   2  -1   12.99    3.81
  23  -2   1   10.75    4.52
  23  -2  -1    7.59    5.96
 -24  -2  -1   30.61   12.75
 -24  -2   1   43.66   14.57
  24   2   1   61.76   11.12
  24   2  -1   29.18   20.63
  24  -2   1   45.89    9.36
  24  -2  -1   47.63   14.68
   1   2  -2  227.46    4.49
  -1   2  -2  251.47    3.97
   1  -2  -2  236.37    4.46
  -1  -2  -2  234.17    4.24
  -1   2   2  238.87    4.76
   1   2   2  244.99    4.67
   1   2  -2  243.98    2.35
  -1   2   2  248.72    4.75
   1   2   2  222.15    3.88
   2   2  -2   49.11    5.56
  -2   2  -2   49.30    2.97
   2  -2  -2   48.85    2.61
  -2   2   2   46.27    2.53
  -2  -2  -2   44.57    2.98
   2   2   2   44.87    3.96
   2   2  -2   45.08    2.40
  -2  -2   2   44.02    2.35
   2  -2   2   48.11    2.42
  -2   2   2   45.73    3.78
   2   2   2   44.48    2.65
  -3   2  -2 2717.49   10.45
   3  -2  -2 2712.37    8.63
  -3  -2  -2 2767.73   15.91
   3  -2   2 2748.66   10.26
   4   2  -2  206.93    5.41
  -4   2  -2  198.34    3.32
   4  -2  -2  198.16    2.24
  -4   2   2  188.97    2.39
  -4  -2  -2  200.74    5.35
   4   2   2  198.59    4.75
   4   2  -2  197.04    3.96
   4  -2   2  203.56    3.55
  -4   2   2  220.15    8.07
   4   2   2  205.31    3.10
   5   2  -2  465.89    8.06
   5  -2  -2  443.60    3.38
  -5   2  -2  475.65    4.29
  -5   2   2  447.73    3.29
   5   2   2  486.23    7.54
   5   2  -2  487.48    6.53
   5  -2   2  482.12    6.98
   6   2  -2 1375.05   26.46
  -6   2  -2 1297.78   22.28
   6   2   2 1386.49   25.95
   6   2  -2 1369.36   25.13
  -6   2   2 1408.74   27.33
   7   2  -2    1.26    2.21
   7  -2  -2    0.66    0.39
  -7   2   2    0.86    0.31
  -7   2  -2    0.76    0.75
   7   2   2    3.04    1.53
   7   2  -2    3.32    1.33
   7  -2   2    2.25    1.90
  -7   2   2    0.82    1.65
  -7  -2   2    1.57    0.54
   8  -2  -2 1085.25   18.96
   8   2  -2 1090.16   22.86
  -8   2  -2 1042.75   18.39
   8   2   2 1084.92   21.78
   8   2  -2 1054.51   21.37
   8  -2   2 1051.10   20.18
   8  -2  -2 1107.58   21.31
  -8   2   2 1039.34   21.79
  -8  -2   2 1013.95   17.81
   9   2  -2  167.08    8.84
  -9   2  -2  187.57    6.19
   9   2   2  194.27    8.23
   9   2  -2  173.73    8.56
   9  -2   2  203.71    7.94
   9  -2  -2  198.74    7.99
  -9   2   2  204.57   10.41
  -9  -2   2  185.32    6.23
  10  -2  -2    9.18    2.77
  10   2  -2   11.84    4.50
 -10   2  -2   10.63    1.34
  10   2   2    9.35    2.63
  10   2  -2   10.08    2.11
  10  -2   2   11.45    2.47
  10  -2  -2   10.76    2.31
 -10   2   2   13.64    3.90
 -10  -2   2    9.35    2.19
  11  -2  -2    0.37    1.11
  11   2  -2    1.62    2.36
 -11   2  -2    0.98    0.99
  11   2   2    1.59    2.56
  11   2  -2    2.77    1.87
  11  -2   2    2.08    2.37
  11  -2  -2    1.35    2.28
 -11   2   2    1.01    1.63
 -11  -2   2    0.07    0.60
  12  -2  -2   82.04    3.53
  12   2  -2   80.52    7.22
 -12   2  -2   81.86    5.62
  12   2   2   77.84    6.05
  12   2  -2   76.95    6.93
  12  -2   2   89.72    6.34
  12  -2  -2   79.41    4.71
 -12  -2   2   73.58    5.76
 -12   2   2   72.56   11.37
  13  -2  -2  116.18    5.99
  13   2  -2  118.84   13.64
 -13   2  -2  130.38    7.61
 -13  -2  -2  134.17    9.71
  13   2   2  142.82   14.06
  13   2  -2  128.12    8.83
  13  -2   2  145.87    8.10
  13  -2  -2  131.26    8.56
 -13  -2   2  120.62    6.51
 -13   2   2  143.46   12.53
  14  -2  -2    1.82    1.05
  14   2  -2    3.13    3.31
 -14   2  -2    1.24    1.23
 -14  -2  -2    0.63    1.88
  14   2   2    3.48    3.76
  14   2  -2    2.75    2.70
  14  -2   2    3.82    2.78
  14  -2  -2    2.36    1.93
 -14  -2   2    1.85    1.35
 -14   2   2    4.27    2.31
  15   2  -2 1329.83   54.16
 -15   2  -2 1456.08   53.51
 -15  -2  -2 1469.65   20.17
  15   2   2 1480.30   21.40
  15   2  -2 1354.97   53.57
  15  -2   2 1488.22   21.90
  15  -2  -2 1596.91   20.49
 -15  -2   2 1334.68   49.06
 -15   2   2 1488.78   21.36
  16   2  -2  173.94   12.21
 -16   2  -2  159.49    9.18
 -16  -2  -2  154.67   11.71
  16   2   2  172.42   12.51
  16   2  -2  162.67   18.79
  16  -2   2  185.64   12.88
  16  -2  -2  175.59   12.17
 -16   2   2  174.69   17.13
  17   2  -2  507.88   22.97
 -17   2  -2  474.20   18.88
 -17  -2  -2  516.47   22.14
  17   2   2  515.10   22.63
  17   2  -2  497.76   22.46
  17  -2   2  524.57   27.57
  17  -2  -2  549.91   23.58
 -17   2   2  571.13   24.99
  18   2  -2  202.28   14.16
 -18  -2  -2  213.68   13.17
  18   2   2  221.98   14.46
  18   2  -2  195.32   12.48
  18  -2   2  218.65   13.29
  18  -2  -2  222.42   13.77
 -18   2   2  242.20   16.15
  19   2  -2    1.53    3.19
 -19  -2  -2    1.42    2.75
  19   2   2    3.84    3.68
  19   2  -2    0.86    2.04
  19  -2   2    4.43    4.20
  19  -2  -2    1.64    3.43
 -19   2   2    1.24    1.97
  20   2  -2   26.99    8.66
 -20  -2  -2   26.67    4.56
  20   2   2   30.50    5.85
  20   2  -2   26.98    5.26
  20  -2   2   29.72    5.64
  20  -2  -2   34.41    5.68
 -20   2   2   37.37   11.09
  21   2  -2  185.69   11.74
 -21  -2  -2  199.96   12.09
  21   2   2  208.10   13.44
  21   2  -2  199.41   12.94
  21  -2   2  201.32   15.25
  21  -2  -2  230.66   14.07
 -21   2   2  196.27   14.98
  22   2  -2    1.02    2.65
 -22  -2  -2    3.34    3.20
  22   2   2    0.94    2.44
  22   2  -2    2.61    3.66
  22  -2   2    4.04    3.13
 -22   2   2    1.26    2.05
  23   2  -2   54.92   10.99
 -23  -2  -2   61.82    6.96
  23   2   2   70.26    8.72
  23   2  -2   60.53    9.50
  23  -2   2   56.09   12.90
  23  -2  -2   62.23    7.51
  24   2  -2  150.33   16.30
 -24  -2  -2  135.08   16.80
  24   2   2  170.95   18.88
  24   2  -2  149.94   19.05
  24  -2   2  167.20   21.92
  24  -2  -2  176.62   18.80
   0   2  -3    0.58    1.42
   0  -2  -3    1.01    1.32
   0   2   3    1.96    1.71
   0   2   3    0.77    1.07
   1   2  -3  582.45    7.11
  -1   2  -3  586.15    6.34
  -1  -2  -3  552.65    6.45
  -1   2   3  583.97    8.55
   1   2   3  575.76    8.92
  -1   2   3  605.95    7.19
   1   2   3  586.33    6.35
   2   2  -3    3.76    1.19
  -2   2  -3    4.02    1.11
   2  -2  -3    4.56    0.84
  -2  -2  -3    4.11    1.19
   2   2   3    5.68    1.77
   2  -2   3    5.27    1.47
  -2  -2   3    4.22    1.01
  -2   2   3    3.79    1.42
   2   2   3    4.54    1.08
   3   2  -3  478.90    7.24
  -3   2  -3  497.18    5.45
  -3  -2  -3  481.83    7.08
   3   2  -3  508.68    5.05
   3  -2   3  480.29    4.44
  -3  -2   3  478.90    4.12
  -3   2  -3  481.67    4.08
  -3   2   3  512.49    7.20
   3   2   3  494.55    5.28
   4   2  -3  188.67    5.18
  -4   2  -3  193.24    3.31
   4  -2  -3  199.38    2.82
  -4  -2  -3  200.24    6.04
   4   2   3  204.60    5.24
   4   2  -3  205.33    4.34
   4  -2   3  186.93    3.85
  -4   2   3  207.65    5.36
   5   2  -3  628.32    9.25
   5  -2  -3  590.80    4.67
  -5   2  -3  582.76    5.54
   5   2   3  593.62    8.60
   5   2  -3  594.65    6.95
   5  -2   3  596.62    6.37
   6   2  -3  487.45   11.81
   6  -2  -3  444.03    8.45
  -6   2  -3  433.24    9.00
  -6  -2  -3  450.89   12.03
   6   2   3  447.29   10.66
   6   2  -3  444.16   10.28
   6  -2   3  470.76   10.09
  -6   2   3  466.77   12.77
   7   2  -3  145.68    5.80
   7  -2  -3  151.86    3.87
  -7   2  -3  145.91    3.86
  -7  -2  -3  153.32    6.12
   7   2   3  157.71    6.45
   7   2  -3  147.53    6.65
   7  -2   3  148.75    6.79
  -7   2   3  169.57    7.10
   8   2  -3  854.83   19.15
   8  -2  -3  808.46   14.77
  -8   2  -3  786.59   14.56
  -8  -2  -3  812.95   17.70
   8   2   3  774.87   16.90
   8   2  -3  770.26   16.70
   8  -2   3  787.72   15.92
  -8   2   3  832.46   18.43
  -8  -2   3  794.44   14.74
   9   2  -3  196.84    9.53
   9  -2  -3  228.50    7.72
  -9   2  -3  211.80    7.10
  -9  -2  -3  218.00    9.15
   9   2   3  224.34    9.28
   9   2  -3  200.89   10.53
   9  -2   3  215.24    8.96
   9  -2  -3  232.69    8.91
  -9   2   3  229.70   10.55
  -9  -2   3  206.40    6.91
  10   2  -3   37.74    7.30
  10  -2  -3   40.49    3.97
 -10   2  -3   37.80    2.17
 -10  -2  -3   39.14    3.82
  10   2   3   41.30    4.30
  10   2  -3   37.20    3.70
  10  -2   3   44.04    4.65
  10  -2  -3   41.98    6.26
 -10   2   3   40.00    6.03
 -10  -2   3   37.07    5.09
  11  -2  -3   72.08    3.74
  11   2  -3   56.34    7.24
 -11   2  -3   64.43    3.13
 -11  -2  -3   67.93    4.92
  11   2   3   57.56    4.51
  11   2  -3   64.47    4.97
  11  -2   3   75.64   10.41
  11  -2  -3   75.91    5.07
 -11   2   3   63.06    9.44
 -11  -2   3   67.80    4.56
  12  -2  -3  211.13    6.91
  12   2  -3  182.42    9.41
 -12   2  -3  200.27    8.52
 -12  -2  -3  199.80    8.80
  12   2   3  211.27    9.49
  12   2  -3  202.07    8.44
  12  -2   3  205.09    8.66
  12  -2  -3  233.77    9.62
 -12   2   3  216.19    9.97
 -12  -2   3  210.93    9.67
  13  -2  -3   27.79    4.51
  13   2  -3   26.22    8.14
 -13   2  -3   25.48    2.18
 -13  -2  -3   23.14    3.82
  13   2   3   23.11    3.89
  13   2  -3   27.63    4.25
  13  -2   3   28.28    3.56
  13  -2  -3   30.50    3.78
 -13   2   3   28.09    8.43
 -13  -2   3   28.39    4.33
  14  -2  -3   29.52    5.32
  14   2  -3   36.99   11.74
 -14   2  -3   36.34    6.58
 -14  -2  -3   38.08    4.27
  14   2   3   32.51    5.20
  14   2  -3   34.35    9.30
  14  -2   3   42.21    8.01
  14  -2  -3   42.78    5.04
 -14   2   3   41.85   11.66
 -14  -2   3   33.08    5.93
  15  -2  -3  127.21    6.82
  15   2  -3  137.28   11.11
 -15   2  -3  131.62    6.56
 -15  -2  -3  139.30    8.72
  15   2   3  136.03    9.22
  15   2  -3  136.71    8.78
  15  -2   3  142.42    8.77
  15  -2  -3  145.15    8.93
 -15   2   3  138.54   11.14
  16  -2  -3    2.47    1.04
  16   2  -3    1.89    2.49
 -16   2  -3    1.16    0.91
 -16  -2  -3    2.81    1.72
  16   2   3    5.71    5.13
  16   2  -3    3.00    2.08
  16  -2   3    3.93    2.85
  16  -2  -3    3.66    3.63
 -16   2   3    0.54    1.18
  17  -2  -3  212.39    9.29
  17   2  -3  259.70   14.79
 -17   2  -3  171.35    7.87
 -17  -2  -3  223.63   11.98
  17   2   3  215.54   12.22
  17   2  -3  226.21   15.29
  17  -2   3  235.55   12.58
  17  -2  -3  249.78   13.30
 -17   2   3  235.07   21.42
  18   2  -3  185.62   11.33
 -18  -2  -3  186.77   11.36
  18   2   3  172.36   10.11
  18   2  -3  177.56   11.15
  18  -2   3  190.60   12.16
  18  -2  -3  193.02   10.69
 -18   2   3  199.53   16.81
  19   2  -3   17.95    6.91
 -19  -2  -3   12.25    3.88
  19   2   3   14.22    4.20
  19   2  -3   14.24    5.41
  19  -2   3   13.82    9.20
  19  -2  -3   13.54    3.98
 -19   2   3   16.76    9.32
  20   2  -3    3.79    3.41
 -20  -2  -3    1.00    1.69
  20   2   3   -0.53    2.42
  20   2  -3    6.66    4.05
  20  -2   3    5.32    4.05
  20  -2  -3    4.30    3.42
 -20   2   3    1.14    2.39
  21   2  -3   15.14    7.25
 -21  -2  -3   19.32    4.03
  21   2   3   14.26    4.59
  21   2  -3   21.80    5.79
  21  -2   3   22.09    9.36
  21  -2  -3   16.53    4.29
 -21   2   3   22.88    7.35
  22   2  -3   75.86   21.92
 -22  -2  -3   61.36    6.91
  22   2   3   68.21    8.47
  22   2  -3   62.65   21.20
  22  -2   3   74.35    8.00
  22  -2  -3   93.11   10.49
 -22   2   3   81.48   11.88
  23   2  -3   12.60    7.86
 -23  -2  -3    9.73    3.34
  23   2   3   15.00    5.27
  23   2  -3   12.36    4.85
  23  -2   3    9.65    6.65
  23  -2  -3   17.45    8.49
 -23   2   3    8.39    7.20
  24   2  -3   16.47   11.51
 -24  -2  -3   19.57   11.67
  24   2   3   22.45    6.31
  24   2  -3   23.27   12.24
  24  -2   3   28.45    8.38
  24  -2  -3   30.94   18.27
 -24   2   3   26.91   11.20
   0   2  -4  291.50    5.26
   0  -2  -4  272.16    4.67
   0   2   4  287.71    6.51
   0   2   4  294.78    5.31
   1   2  -4    1.06    1.71
  -1   2  -4    0.64    1.50
   1  -2  -4    0.55    1.33
  -1  -2  -4    2.27    1.64
  -1   2   4    1.21    0.91
   1  -2   4    0.30    0.25
   1   2   4    0.62    0.71
   1   2  -4    0.38    0.24
   1   2  -4    1.26    0.35
  -1   2  -4    0.82    0.28
  -1   2   4    0.17    1.14
   1   2   4    2.14    1.28
   2   2  -4   17.23    2.37
  -2   2  -4   13.93    1.75
   2  -2  -4   17.02    1.57
  -2  -2  -4   16.69    2.04
  -2   2   4   17.35    2.48
   2   2   4   18.19    2.53
   2  -2   4   16.78    1.14
   2   2  -4   19.66    1.36
  -2   2  -4   17.42    1.43
  -2   2   4   19.81    2.27
   2   2   4   19.31    2.22
   3   2  -4   68.57    4.46
  -3   2  -4   65.62    3.85
   3  -2  -4   61.03    3.93
  -3  -2  -4   63.03    4.26
   3   2   4   70.49    6.84
   3  -2   4   61.28    3.13
   3   2  -4   64.02    3.42
  -3   2  -4   55.96    3.08
  -3   2   4   66.53    4.40
   4   2  -4  377.94    9.61
  -4   2  -4  373.70    8.20
   4  -2  -4  388.51    7.78
  -4  -2  -4  381.49    9.34
   4   2   4  392.76   10.54
   4  -2   4  368.63    7.47
   4   2  -4  388.78    8.36
  -4   2   4  401.21    9.72
   5   2  -4    7.68    2.29
   5  -2  -4    7.54    1.14
  -5   2  -4    6.81    1.34
  -5  -2  -4    8.07    1.97
   5   2   4    7.78    2.17
   5  -2   4    6.73    1.28
   5   2  -4    7.88    1.45
  -5   2   4    6.94    3.14
   6   2  -4  198.39    6.77
   6  -2  -4  213.57    5.02
  -6   2  -4  208.61    5.24
  -6  -2  -4  220.05    6.83
   6   2   4  214.77    6.95
   6  -2   4  228.31    6.81
   6   2  -4  222.45    6.30
  -6   2   4  225.10    7.08
   7   2  -4 1146.34   23.08
   7  -2  -4 1185.74   21.04
  -7   2  -4 1188.64   21.73
  -7  -2  -4 1225.37   24.36
   7   2   4 1204.51   23.95
   7  -2   4 1250.62   23.13
   7   2  -4 1262.95   24.09
  -7   2   4 1221.39   23.94
   8   2  -4 2020.67   58.83
   8  -2  -4 2188.48   11.33
  -8   2  -4 2133.36   60.27
  -8  -2  -4 2254.28   19.24
   8   2   4 2185.05   18.71
   8  -2   4 2270.23   15.57
   8   2  -4 2255.83   17.90
  -8   2   4 2114.56   61.08
  -8  -2   4 2050.75   57.97
   9   2  -4  200.79   11.31
  -9   2  -4  197.31    7.35
  -9  -2  -4  201.54    8.77
   9   2   4  204.76    9.18
   9  -2   4  201.46    7.94
   9   2  -4  200.80    8.32
  -9   2   4  221.11   11.43
  -9  -2   4  205.12    7.18
  10   2  -4  653.92   19.37
  10  -2  -4  692.40   17.19
 -10   2  -4  689.96   17.06
 -10  -2  -4  701.58   19.55
  10   2   4  693.02   19.38
  10  -2   4  723.00   19.11
  10   2  -4  710.92   19.30
  10  -2  -4  703.87   18.99
 -10   2   4  735.94   22.51
 -10  -2   4  681.11   16.80
  11   2  -4   23.11    8.12
  11  -2  -4   18.44    4.55
 -11   2  -4   28.22    5.39
 -11  -2  -4   18.49    3.55
  11   2   4   28.30    8.60
  11  -2   4   21.83    5.24
  11   2  -4   20.11    3.72
  11  -2  -4   27.39    7.90
 -11   2   4   20.77    4.44
 -11  -2   4   23.15    2.24
  12   2  -4    4.73    1.98
  12  -2  -4    4.79    2.26
 -12   2  -4    4.62    1.41
 -12  -2  -4    3.51    1.75
  12   2   4    4.64    2.58
  12  -2   4    5.84    2.02
  12   2  -4    4.24    2.19
  12  -2  -4    6.54    2.81
 -12   2   4    7.83    2.89
 -12  -2   4    3.63    1.40
  13  -2  -4   74.74    3.73
  13   2  -4   71.67   14.23
 -13   2  -4   75.41    3.75
 -13  -2  -4   72.56   11.28
  13   2   4   81.07    9.65
  13  -2   4   75.90    5.43
  13   2  -4   70.80    9.52
  13  -2  -4   82.23    5.76
 -13   2   4   72.25   11.96
 -13  -2   4   76.96    7.58
  14  -2  -4  124.27    6.96
  14   2  -4  164.99   10.67
 -14   2  -4  165.27    7.75
 -14  -2  -4  168.49    9.88
  14   2   4  161.29   14.98
  14  -2   4  159.98    9.40
  14   2  -4  178.78   12.68
  14  -2  -4  178.85   10.77
 -14   2   4  175.25   10.82
 -14  -2   4  175.10   10.07
  15  -2  -4   65.46    5.54
  15   2  -4   65.12   13.50
 -15   2  -4   65.95   10.06
 -15  -2  -4   69.37    8.99
  15   2   4   81.49    8.28
  15  -2   4   79.81   15.73
  15  -2  -4   83.84   15.70
 -15   2   4   83.33   17.14
 -15  -2   4   76.22    6.76
  16  -2  -4    3.22    1.87
  16   2  -4    6.96    3.17
 -16   2  -4    3.62    1.35
 -16  -2  -4    4.11    2.63
  16   2   4    8.38    3.57
  16  -2   4    7.16    4.21
  16   2  -4    4.00    2.58
  16  -2  -4    6.06    2.90
 -16  -2   4    4.77    1.61
 -16   2   4    7.43    3.72
  17  -2  -4   35.44    6.77
  17   2  -4   53.39   17.87
 -17   2  -4   51.58    4.44
 -17  -2  -4   46.81    5.31
  17   2   4   52.51    7.43
  17  -2   4   53.06    5.86
  17   2  -4   44.82   10.67
  17  -2  -4   55.57    6.98
 -17   2   4   53.41    9.45
  18   2  -4    2.35    3.94
 -18   2  -4    1.16    1.44
 -18  -2  -4    0.21    1.59
  18   2   4    2.43    2.63
  18  -2   4    1.78    2.76
  18   2  -4    1.32    2.28
  18  -2  -4    4.17    4.79
 -18   2   4    0.93    2.30
  19   2  -4   25.59   12.10
 -19  -2  -4   28.81    4.90
  19   2   4   23.99    5.63
  19  -2   4   25.54    7.40
  19  -2  -4   28.61    5.85
 -19   2   4   29.99    8.93
  20   2  -4   28.23   14.35
 -20  -2  -4   30.94    9.31
  20   2   4   33.51    7.41
  20  -2   4   36.12   13.79
  20   2  -4   28.02   14.09
  20  -2  -4   40.94    6.88
 -20   2   4   34.26   11.78
  21   2  -4   42.34   18.55
 -21  -2  -4   41.09    8.10
  21   2   4   47.76    8.64
  21  -2   4   50.78   15.66
  21   2  -4   47.80   10.87
  21  -2  -4   41.05   11.82
 -21   2   4   45.70   13.89
  22   2  -4   41.81   21.66
  22   2   4   48.51   13.58
  22  -2   4   61.21    7.26
  22   2  -4   53.92    8.32
  22  -2  -4   59.76    7.97
 -22   2   4   50.46   20.46
  23   2  -4    5.19    2.56
 -23  -2  -4    2.62    2.28
  23   2   4    3.22    3.75
  23  -2   4    4.36    3.84
  23   2  -4    4.97    4.01
  23  -2  -4    2.59    4.78
 -23   2   4    2.20    3.29
   0   2  -5    1.41    1.46
   0  -2  -5    1.26    1.32
   0   2   5    0.75    0.90
   0   2  -5    0.36    0.38
   0   2   5    0.78    1.70
  -1   2  -5 2695.12   31.78
   1  -2  -5 2709.39   31.28
  -1  -2  -5 2524.59   29.87
  -1   2   5 2535.53   31.44
   1   2   5 2742.70   33.59
   1   2  -5 2504.13   26.71
  -1   2   5 2632.73   31.50
   1   2   5 2679.55   31.46
   2   2  -5  841.96   16.96
  -2   2  -5  807.75   15.74
   2  -2  -5  829.24   15.76
  -2  -2  -5  798.93   16.36
  -2   2   5  762.35   16.08
   2   2  -5  742.14   13.36
   2   2   5  818.30   17.88
   2  -2   5  847.88   14.91
  -2   2  -5  848.15   14.92
   2   2  -5  824.61   14.45
  -2   2   5  828.39   16.60
   3   2  -5  157.15    5.88
  -3   2  -5  139.37    4.50
   3  -2  -5  145.94    5.08
  -3  -2  -5  131.81    4.75
   3   2   5  153.08    7.03
   3  -2   5  148.50    3.82
   3   2  -5  138.59    4.32
  -3   2   5  144.89    7.04
   4   2  -5    5.07    1.89
  -4   2  -5    5.61    1.53
   4  -2  -5    5.70    1.50
  -4  -2  -5    5.84    1.73
   4   2   5    6.43    2.21
   4  -2   5    5.95    1.89
   4   2  -5    5.58    1.17
  -4   2   5    8.32    3.16
   5   2  -5   80.07    6.23
   5  -2  -5  108.01    3.61
  -5   2  -5  101.82    4.23
  -5  -2  -5  113.12    6.92
   5   2   5  109.20    8.18
   5  -2   5  110.27    3.63
   5   2  -5  103.01    4.39
  -5   2   5  100.47    4.63
   6   2  -5   72.31    5.80
   6  -2  -5   71.95    5.25
  -6   2  -5   77.40    5.42
  -6  -2  -5   84.61    4.25
   6   2   5   79.66    6.17
   6  -2   5   86.97    3.92
   6   2  -5   74.26    5.38
  -6   2   5   70.44    5.52
   7   2  -5  376.01   13.26
   7  -2  -5  397.99   12.33
  -7   2  -5  400.02   12.68
  -7  -2  -5  415.24   15.20
   7   2   5  399.38   14.54
   7  -2   5  415.47   13.73
   7   2  -5  394.05   12.97
  -7   2   5  412.67   14.71
   8   2  -5  571.32   19.04
   8  -2  -5  610.88   18.29
  -8   2  -5  604.29   18.38
  -8  -2  -5  636.56   20.69
   8   2   5  609.03   19.83
   8  -2   5  608.95   18.79
   8   2  -5  599.71   18.95
  -8   2   5  611.20   19.84
   9   2  -5  151.11    6.91
   9  -2  -5  160.88    5.59
  -9   2  -5  158.82    5.57
  -9  -2  -5  136.13    6.59
   9   2   5  161.22    7.38
   9  -2   5  161.29    6.21
   9   2  -5  160.84    6.90
  -9   2   5  152.12    7.95
  -9  -2   5  161.11    5.70
  10   2  -5  274.52   10.23
 -10   2  -5  288.34    8.51
 -10  -2  -5  297.30   10.58
  10   2   5  301.08   10.91
  10  -2   5  301.94   10.47
  10   2  -5  312.16   10.38
 -10   2   5  302.27   13.04
  11   2  -5  301.11   14.24
  11  -2  -5  323.91   13.37
 -11   2  -5  334.21   14.24
 -11  -2  -5  337.06   15.23
  11   2   5  347.49   15.90
  11  -2   5  342.23   14.71
  11   2  -5  346.38   15.26
  11  -2  -5  325.21   14.54
 -11   2   5  349.69   16.70
  12   2  -5   33.14   10.81
  12  -2  -5   29.90    2.68
 -12   2  -5   34.98    2.82
 -12  -2  -5   32.62    3.86
  12   2   5   33.03    4.42
  12  -2   5   31.91    6.64
  12   2  -5   36.64   10.98
  12  -2  -5   41.41    9.86
 -12   2   5   34.38    8.04
 -12  -2   5   34.89    2.88
  13   2  -5   12.59    4.67
  13  -2  -5   10.89    4.21
 -13   2  -5    8.33    1.58
 -13  -2  -5   10.81    4.09
  13   2   5    7.63    3.18
  13  -2   5   12.26    3.84
  13   2  -5    8.82    3.62
  13  -2  -5   11.17    3.33
 -13   2   5   12.40    4.01
 -13  -2   5    7.94    1.81
  14  -2  -5  178.09    8.92
  14   2  -5  180.72   10.99
 -14   2  -5  193.21    8.84
 -14  -2  -5  179.35   10.67
  14   2   5  194.70   11.26
  14  -2   5  185.04   11.85
  14   2  -5  185.12   10.13
  14  -2  -5  225.89   12.25
 -14   2   5  176.60   11.19
 -14  -2   5  181.25   10.46
  15  -2  -5   38.06    6.61
  15   2  -5   43.00   12.53
 -15   2  -5   43.79    3.19
 -15  -2  -5   47.42    4.63
  15   2   5   45.75    7.79
  15  -2   5   48.70   11.22
  15   2  -5   46.43   15.32
  15  -2  -5   50.10    5.87
 -15   2   5   47.99   11.85
 -15  -2   5   44.46    7.83
  16  -2  -5  447.74   17.92
  16   2  -5  443.55   20.88
 -16   2  -5  489.68   19.39
 -16  -2  -5  446.63   19.44
  16   2   5  475.46   21.59
  16  -2   5  452.21   20.83
  16   2  -5  458.11   20.12
  16  -2  -5  436.65   19.11
 -16   2   5  454.24   21.20
 -16  -2   5  447.58   18.30
  17   2  -5   55.16   16.49
 -17   2  -5   47.42    3.73
 -17  -2  -5   54.98    5.76
  17   2   5   64.97    8.02
  17  -2   5   47.29   14.22
  17   2  -5   59.48    7.00
  17  -2  -5   53.13    6.57
 -17   2   5   64.74   15.50
  18   2  -5   23.13   11.36
 -18   2  -5   19.06    2.75
 -18  -2  -5   23.72    4.31
  18   2   5   22.86    9.02
  18  -2   5   19.13    8.82
  18   2  -5   21.22    9.06
  18  -2  -5   20.99    4.57
 -18   2   5   22.93    6.65
  19   2  -5  206.02   15.89
 -19  -2  -5  200.42   14.39
  19   2   5  173.22   21.48
  19  -2   5  183.24   13.25
  19   2  -5  190.42   13.93
  19  -2  -5  189.56   17.74
 -19   2   5  188.99   14.45
  20   2  -5    2.56    2.84
 -20  -2  -5    2.95    3.06
  20   2   5    1.87    2.73
  20  -2   5    3.13    3.03
  20   2  -5    1.13    2.20
  20  -2  -5    2.49    2.65
 -20   2   5    0.32    1.61
  21   2  -5    3.61    3.23
 -21  -2  -5    3.30    3.18
  21   2   5    2.32    2.80
  21  -2   5    3.39    2.35
  21   2  -5    1.64    3.01
  21  -2  -5    1.05    2.55
 -21   2   5    4.77    3.19
  22   2  -5    1.60    2.43
 -22  -2  -5    3.00    2.68
  22   2   5    0.10    2.87
  22  -2   5    1.53    1.81
  22   2  -5    2.18    2.57
  22  -2  -5    3.23    3.65
 -22   2   5    1.96    2.09
  23   2  -5    9.14    6.94
 -23  -2  -5   13.45    3.81
  23   2   5    8.26    7.59
  23  -2   5   10.48    7.25
  23   2  -5   12.97    9.29
  23  -2  -5   12.29    4.85
 -23   2   5   12.50    6.67
   0   2   6 3515.95   54.17
   0   2   6 3611.79   42.02
  -1   2  -6 2885.06   34.27
   1  -2  -6 2860.09   33.67
  -1  -2  -6 2860.86   33.93
   1  -2   6 2654.94   29.37
  -1   2   6 2557.36   34.27
  -1   2  -6 2792.99   30.87
  -1   2   6 2807.43   33.94
   2   2  -6    9.24    2.25
  -2   2  -6   11.74    3.00
   2  -2  -6   12.01    4.00
  -2  -2  -6    8.90    1.85
  -2   2   6   15.25    4.57
   2   2  -6    6.34    2.02
   2   2   6   12.03    4.48
   2  -2   6   11.05    2.61
  -2   2  -6    8.26    1.73
  -2   2   6   11.37    1.94
   3   2  -6   48.41    4.53
  -3   2  -6   53.18    4.28
   3  -2  -6   51.97    3.96
  -3  -2  -6   50.29    5.21
   3   2   6   57.30    9.20
   3  -2   6   53.29    4.06
   3   2  -6   56.05    3.82
  -3   2   6   47.84    4.38
   4   2  -6  687.71   21.71
  -4   2  -6  636.83   19.42
   4  -2  -6  654.89   19.65
  -4  -2  -6  672.98   20.88
   4   2   6  680.76   21.92
   4  -2   6  677.20   19.89
   4   2  -6  662.06   19.46
  -4   2   6  579.96   18.59
   5   2  -6  404.83   14.05
   5  -2  -6  461.38   14.25
  -5   2  -6  448.35   14.24
  -5  -2  -6  461.44   15.17
   5   2   6  489.58   16.45
   5  -2   6  488.55   15.00
   5   2  -6  441.01   13.60
  -5   2   6  385.22   13.31
   6   2  -6   25.06    3.44
   6  -2  -6   25.23    2.36
  -6   2  -6   34.04    4.94
  -6  -2  -6   25.73    5.63
   6   2   6   24.35    6.25
   6  -2   6   31.89    2.42
   6   2  -6   25.46    2.38
  -6   2   6   23.62    3.10
   7   2  -6    3.00    1.58
   7  -2  -6    3.01    1.60
  -7   2  -6    5.20    1.94
  -7  -2  -6    2.51    1.32
   7   2   6    2.30    1.61
   7  -2   6    3.79    1.55
   7   2  -6    2.93    1.71
  -7   2   6    4.34    2.00
   8   2  -6   22.86    3.42
   8  -2  -6   24.41    2.53
  -8   2  -6   27.11    3.78
  -8  -2  -6   25.87    4.25
   8   2   6   24.34    3.32
   8  -2   6   23.82    2.66
   8   2  -6   26.41    4.54
  -8   2   6   22.42    3.00
   9   2  -6  352.73   12.07
  -9   2  -6  362.47   11.01
  -9  -2  -6  364.05   14.03
   9   2   6  353.36   11.84
   9  -2   6  378.16   11.92
   9   2  -6  359.61   11.24
  -9   2   6  339.42   11.41
  -9  -2   6  349.61   10.25
  10   2  -6   51.48    5.06
 -10   2  -6   49.09    3.20
 -10  -2  -6   46.02    6.28
  10   2   6   43.84    4.27
  10  -2   6   50.73    7.21
  10   2  -6   51.43    4.64
 -10   2   6   48.40    5.67
 -10  -2   6   51.10    3.42
  11   2  -6   98.70    6.54
  11  -2  -6   95.31    4.84
 -11   2  -6   99.76    4.50
 -11  -2  -6  107.36    6.44
  11   2   6   98.68    6.30
  11  -2   6  107.17    5.52
  11   2  -6   97.32    5.75
 -11   2   6   87.41    9.29
 -11  -2   6   96.42    8.07
  12   2  -6   27.38    9.59
  12  -2  -6   24.82    6.62
 -12   2  -6   28.23    6.61
 -12  -2  -6   24.12    3.67
  12   2   6   28.66    4.56
  12  -2   6   28.50    3.68
  12   2  -6   28.09    4.16
  12  -2  -6   35.99   10.89
 -12   2   6   33.25    7.92
 -12  -2   6   28.05    6.16
  13   2  -6  121.08   15.00
  13  -2  -6  125.01    6.79
 -13   2  -6  129.70    9.15
 -13  -2  -6  130.55    8.10
  13   2   6  142.81    9.48
  13  -2   6  119.53   10.23
  13   2  -6  128.11    8.05
  13  -2  -6  135.26   11.81
 -13   2   6  133.74    9.51
 -13  -2   6  126.37    6.70
  14   2  -6   47.14    9.78
  14  -2  -6   41.10    4.49
 -14   2  -6   48.06    8.00
 -14  -2  -6   49.36    4.66
  14   2   6   52.97   10.38
  14  -2   6   49.69    8.20
  14   2  -6   54.91    4.83
  14  -2  -6   52.56    4.87
 -14   2   6   59.18   11.73
 -14  -2   6   46.73    6.80
  15   2  -6    4.03    3.16
  15  -2  -6    4.95    2.33
 -15   2  -6    7.86    2.03
 -15  -2  -6    5.02    2.47
  15   2   6    5.53    3.00
  15  -2   6    8.38    3.36
  15   2  -6    5.83    2.77
  15  -2  -6    4.58    2.11
 -15   2   6    8.88    3.06
 -15  -2   6    6.11    2.77
  16  -2  -6    6.16    2.90
  16   2  -6   10.07    4.87
 -16   2  -6    9.36    3.23
 -16  -2  -6    9.86    3.06
  16   2   6    6.63    3.33
  16  -2   6    6.58    3.17
  16   2  -6    7.19    2.75
  16  -2  -6    6.92    2.88
 -16   2   6   12.80    4.82
 -16  -2   6    7.20    2.75
  17   2  -6  191.84   14.79
 -17   2  -6  194.98    8.69
 -17  -2  -6  224.16   11.54
  17   2   6  219.53   12.32
  17  -2   6  195.72   10.83
  17   2  -6  193.12   17.08
  17  -2  -6  214.28   11.68
 -17   2   6  215.73   13.08
  18   2  -6  157.05   13.51
 -18   2  -6  161.18   11.05
 -18  -2  -6  153.39   17.21
  18   2   6  183.52   13.81
  18  -2   6  161.15   11.79
  18   2  -6  160.62   12.57
  18  -2  -6  194.09   14.38
 -18   2   6  179.36   13.96
  19   2  -6  123.77   22.12
 -19  -2  -6  123.79   17.17
  19   2   6  128.66   13.63
  19  -2   6  131.12   12.22
  19   2  -6  121.36   11.51
  19  -2  -6  130.47   12.53
 -19   2   6  131.50   18.63
  20   2  -6   14.49    7.83
 -20  -2  -6   16.14    3.66
  20   2   6   11.54    3.51
  20  -2   6   11.79    3.15
  20   2  -6    9.78    2.97
  20  -2  -6   15.48    3.84
 -20   2   6   13.25    8.10
  21   2  -6   41.76   19.49
 -21  -2  -6   38.74   10.21
  21   2   6   48.85    7.14
  21  -2   6   65.14    7.69
  21   2  -6   59.44    8.08
  21  -2  -6   47.47    6.38
 -21   2   6   54.34   18.38
  22   2  -6    1.71    3.18
 -22  -2  -6    3.58    2.37
  22   2   6    2.05    2.51
  22  -2   6    2.28    3.67
  22   2  -6    3.09    3.46
  22  -2  -6    5.13    4.93
 -22   2   6    1.84    1.63
 -23  -2  -6  146.12   15.87
  23   2   6  124.64   15.02
  23  -2   6  128.23   14.61
  23  -2  -6  134.44   17.04
   0   2  -7    0.38    1.28
   0  -2  -7    1.21    1.81
   0   2   7    1.13    1.53
   0   2   7    0.53    1.21
   1   2  -7    1.22    1.83
  -1   2  -7    0.88    1.02
   1  -2  -7    1.42    1.70
  -1  -2  -7    0.62    1.58
   1  -2   7    0.47    0.89
  -1   2   7    1.55    1.36
   1   2   7    1.06    1.46
  -1   2   7    1.03    1.06
   2   2  -7  374.15   12.99
  -2   2  -7  386.94   12.92
   2  -2  -7  374.82   12.30
  -2  -2  -7  350.66   11.91
  -2   2   7  354.57   12.42
   2  -2   7  363.89   11.21
   2   2   7  340.47   12.55
  -2   2   7  355.67   12.33
   3   2  -7    1.11    2.17
  -3   2  -7    3.38    1.69
   3  -2  -7    1.86    1.78
  -3  -2  -7    0.44    1.33
   3   2   7    0.65    0.70
   3  -2   7    0.36    0.78
   3   2  -7    0.16    0.55
  -3   2   7    2.60    2.81
   4   2  -7   56.80    4.80
  -4   2  -7   62.13    6.24
   4  -2  -7   55.85    5.35
  -4  -2  -7   51.14    3.32
   4   2   7   60.36    6.85
   4  -2   7   55.53    4.02
   4   2  -7   52.49    2.92
  -4   2   7   55.00    4.26
   5   2  -7    0.59    2.41
   5  -2  -7    2.59    2.04
  -5   2  -7    0.97    1.21
  -5  -2  -7    0.98    1.36
   5   2   7    1.12    1.25
   5  -2   7    2.69    1.42
   5   2  -7    1.40    0.92
  -5   2   7    0.84    1.57
   6   2  -7  355.16   11.84
   6  -2  -7  362.14   10.33
  -6   2  -7  344.36   10.09
  -6  -2  -7  365.11   11.38
   6   2   7  366.01   12.03
   6  -2   7  354.66    9.95
   6   2  -7  336.27    9.54
  -6   2   7  330.40   10.76
   7   2  -7   33.55    4.12
   7  -2  -7   28.97    2.88
  -7   2  -7   30.83    2.82
  -7  -2  -7   28.16    4.48
   7   2   7   28.52    2.98
   7   2  -7   30.36    2.72
  -7   2   7   26.52    3.23
   8   2  -7   53.52    5.18
   8  -2  -7   55.87    4.04
  -8   2  -7   59.18    4.95
  -8  -2  -7   59.98    4.94
   8   2   7   52.84    6.48
   8  -2   7   61.68    4.29
   8   2  -7   60.82    4.36
  -8   2   7   55.57    4.84
   9   2  -7  202.48   10.63
   9  -2  -7  189.37    8.78
  -9   2  -7  201.73    9.37
  -9  -2  -7  215.09   10.94
   9   2   7  208.30   10.89
   9  -2   7  208.37    9.71
   9   2  -7  189.32    9.13
  -9   2   7  193.99   10.04
  10   2  -7  188.79    9.99
  10  -2  -7  188.38    6.97
 -10   2  -7  192.37    6.78
 -10  -2  -7  202.80   13.57
  10   2   7  188.49    8.76
  10  -2   7  205.01    7.55
  10   2  -7  188.23    7.32
 -10   2   7  174.37    7.71
 -10  -2   7  193.96    7.07
  11   2  -7   13.16    3.56
  11  -2  -7   10.90    4.34
 -11   2  -7   12.73    3.96
 -11  -2  -7    8.49    2.41
  11   2   7    8.67    2.73
  11  -2   7   10.49    2.19
  11   2  -7   13.78    3.60
 -11   2   7   11.67    3.79
 -11  -2   7   13.34    4.89
  12   2  -7  145.73    9.48
  12  -2  -7  137.18    7.35
 -12  -2  -7  147.38    8.69
  12   2   7  141.18    8.77
  12  -2   7  142.83    7.75
  12   2  -7  138.22    7.87
  12  -2  -7  141.24   11.13
 -12   2   7  136.34   10.12
 -12  -2   7  139.40    7.53
  13   2  -7    0.59    2.40
  13  -2  -7    0.78    1.43
 -13  -2  -7    1.48    2.55
  13   2   7    0.73    2.34
  13  -2   7    1.94    2.62
  13   2  -7    0.49    1.44
  13  -2  -7    2.66    1.84
 -13   2   7    2.34    2.41
 -13  -2   7    1.70    1.35
  14   2  -7   86.42   18.26
  14  -2  -7   79.96    5.50
 -14   2  -7   76.61    5.06
 -14  -2  -7   82.61   10.60
  14  -2   7   82.47    8.46
  14   2  -7   84.76    6.34
  14  -2  -7   82.46   13.06
 -14   2   7   87.62   10.19
 -14  -2   7   84.45    5.57
  15   2  -7    5.50    3.61
  15  -2  -7    2.88    1.97
 -15   2  -7    2.82    1.56
 -15  -2  -7    4.05    2.38
  15   2   7    6.09    3.03
  15  -2   7    4.50    2.32
  15   2  -7    3.62    2.20
  15  -2  -7    4.98    3.77
 -15   2   7    1.40    2.44
 -15  -2   7    3.65    1.66
  16   2  -7   58.23   11.36
  16  -2  -7   62.30    4.86
 -16   2  -7   60.25   10.99
 -16  -2  -7   58.88    5.49
  16   2   7   68.83    7.11
  16  -2   7   58.35   13.84
  16   2  -7   65.40    6.81
  16  -2  -7   66.15    5.82
 -16   2   7   71.85   11.54
 -16  -2   7   58.63    7.88
  17   2  -7   32.43   16.64
 -17   2  -7   38.90    4.11
 -17  -2  -7   43.66    5.62
  17   2   7   39.39    6.36
  17  -2   7   42.82    5.69
  17   2  -7   33.79   15.25
  17  -2  -7   35.93   13.23
 -17   2   7   44.84   13.27
  18   2  -7   70.19   16.77
 -18  -2  -7   84.04    9.60
  18   2   7   79.30    9.47
  18  -2   7   63.92   16.34
  18   2  -7   73.17    8.55
  18  -2  -7   79.51    9.62
 -18   2   7   77.31   14.63
  19   2  -7   27.98   12.28
 -19  -2  -7   30.69    4.85
  19   2   7   36.13    6.00
  19  -2   7   34.47    4.93
  19   2  -7   25.75    9.74
  19  -2  -7   36.37    5.60
 -19   2   7   36.96   11.05
  20   2  -7  264.58   16.04
 -20  -2  -7  239.62   12.39
  20   2   7  247.14   14.59
  20  -2   7  241.33   12.32
  20   2  -7  250.99   13.44
  20  -2  -7  252.93   21.01
 -20   2   7  256.14   19.35
  21   2  -7   13.37    7.64
 -21  -2  -7   13.35    3.53
  21   2   7   10.98    4.76
  21  -2   7   10.52    5.17
  21   2  -7   12.18    4.52
  21  -2  -7    7.43    5.95
 -21   2   7   10.38    7.22
  22   2  -7    1.07    2.15
 -22  -2  -7    4.03    2.42
  22   2   7    5.58    4.82
  22  -2   7   -0.05    1.96
  22   2  -7    3.99    2.97
  22  -2  -7    7.10    4.96
 -22   2   7    1.18    1.21
   0   2  -8   36.57    5.62
   0  -2  -8   36.07    3.07
   0   2   8   37.79    9.62
   1   2  -8  106.92    5.46
  -1   2  -8   98.59    4.90
   1  -2  -8  108.21    4.85
  -1  -2  -8  107.28    4.99
  -1   2   8  105.63    5.57
   1   2   8  110.25    6.15
  -1   2   8  106.51    5.26
   2   2  -8   59.76    4.46
  -2   2  -8   55.92    3.78
   2  -2  -8   57.07    3.48
  -2  -2  -8   54.22    4.49
   2  -2   8   61.50    5.41
   2   2   8   63.06    7.05
  -2   2   8   55.00    6.80
   3   2  -8   12.10    2.73
  -3   2  -8   18.52    2.91
   3  -2  -8   18.63    2.29
  -3  -2  -8   17.17    2.61
   3  -2   8   14.19    4.02
   3   2   8   17.28    6.06
  -3   2   8   16.78    2.93
   4   2  -8  105.70    6.21
  -4   2  -8  102.30    5.22
   4  -2  -8  111.31    5.25
  -4  -2  -8   91.94    5.67
   4   2   8   95.88    6.78
   4  -2   8   99.06    4.27
   4   2  -8  100.11    4.56
  -4   2   8   97.09    5.54
   5   2  -8  295.71   10.59
   5  -2  -8  293.43    9.26
  -5   2  -8  341.72   10.83
  -5  -2  -8  277.88    9.26
   5   2   8  346.20   12.04
   5  -2   8  322.25    9.33
   5   2  -8  295.99    8.34
  -5   2   8  255.78   11.72
   6   2  -8  893.84   14.24
   6  -2  -8  930.35   10.84
  -6   2  -8  907.64   11.78
  -6  -2  -8  861.17   33.23
   6   2   8  858.88   34.51
   6   2  -8  890.73    9.61
  -6   2   8  827.15   33.05
   7   2  -8  394.14   17.37
   7  -2  -8  420.43   17.89
  -7   2  -8  384.15   15.99
  -7  -2  -8  343.28   15.47
   7   2   8  422.19   18.36
   7  -2   8  405.88   16.38
   7   2  -8  394.01   15.79
  -7   2   8  395.58   19.06
   8   2  -8  303.42   11.31
   8  -2  -8  292.14    9.23
  -8   2  -8  274.07    9.02
  -8  -2  -8  250.86    9.53
   8   2   8  254.70   11.50
   8  -2   8  276.95    8.72
   8   2  -8  266.20    8.36
  -8   2   8  262.28   10.02
   9   2  -8    0.14    1.92
   9  -2  -8    1.31    1.73
  -9   2  -8    0.31    1.31
  -9  -2  -8    0.71    1.68
   9   2   8    0.25    2.01
   9  -2   8    1.72    2.06
   9   2  -8    1.54    2.04
  -9   2   8    1.48    3.17
  10   2  -8    1.19    2.10
  10  -2  -8    2.10    1.95
 -10   2  -8    0.92    0.87
 -10  -2  -8    1.22    2.63
  10   2   8    2.02    3.00
  10  -2   8    1.09    1.67
  10   2  -8    1.41    2.39
 -10   2   8    3.22    3.53
 -10  -2   8    1.13    1.20
  11   2  -8  519.73   22.65
  11  -2  -8  527.37   20.96
 -11   2  -8  519.84   20.81
 -11  -2  -8  575.78   23.91
  11   2   8  525.52   22.85
  11  -2   8  541.93   21.96
  11   2  -8  515.77   21.12
 -11   2   8  531.75   23.19
 -11  -2   8  544.70   21.81
  12   2  -8  313.55   18.86
  12  -2  -8  326.66   17.69
 -12   2  -8  336.25   18.27
 -12  -2  -8  342.43   19.50
  12   2   8  332.03   19.38
  12  -2   8  335.02   18.58
  12   2  -8  314.27   17.60
 -12   2   8  330.74   19.24
 -12  -2   8  329.32   17.99
  13   2  -8    9.27    3.25
  13  -2  -8    9.80    2.47
 -13   2  -8   11.08    3.81
 -13  -2  -8   10.96    2.97
  13   2   8    9.40    3.50
  13   2  -8    8.26    2.48
  13  -2  -8   12.02    4.01
 -13   2   8   12.58    4.07
 -13  -2   8    9.95    2.37
  14   2  -8   98.26   14.91
  14  -2  -8  112.76    7.63
 -14   2  -8  115.17    7.35
 -14  -2  -8  119.05    8.71
  14   2   8  105.19    8.45
  14  -2   8  113.48    8.38
  14   2  -8  106.68    8.41
  14  -2  -8  108.09   11.23
 -14   2   8  113.21   13.16
 -14  -2   8  116.99    7.83
  15   2  -8  100.60   20.97
  15  -2  -8  103.46    7.17
 -15   2  -8  113.65    8.39
 -15  -2  -8  110.54    7.61
  15   2   8  107.91    8.13
  15  -2   8  113.97    7.89
  15   2  -8  112.33    8.08
  15  -2  -8  110.30    7.36
 -15   2   8  116.41   13.77
 -15  -2   8  102.62    6.85
  16   2  -8    8.30    4.92
  16  -2  -8   17.48    3.92
 -16   2  -8    6.69    2.01
 -16  -2  -8    8.68    5.11
  16   2   8    5.02    3.29
  16  -2   8    5.68    2.87
  16   2  -8    8.90    5.10
  16  -2  -8    9.91    3.45
 -16   2   8    9.81    7.10
 -16  -2   8   10.80    2.79
  17   2  -8   70.61   25.10
 -17   2  -8   75.76   13.97
 -17  -2  -8   68.48   15.32
  17   2   8   78.29    8.69
  17  -2   8   73.85   10.75
  17   2  -8   72.96   14.46
  17  -2  -8   79.98    7.57
 -17   2   8   91.12   17.63
  18   2  -8    8.60    3.51
 -18   2  -8    3.92    1.91
 -18  -2  -8    3.70    2.73
  18   2   8    7.97    3.73
  18  -2   8    8.73    4.02
  18   2  -8    6.31    2.97
  18  -2  -8    4.15    1.97
 -18   2   8    8.67    3.88
  19   2  -8    2.27    3.48
 -19  -2  -8    2.34    3.33
  19   2   8    0.73    3.42
  19  -2   8    4.13    3.04
 -19   2   8    0.89    1.39
  20   2  -8   23.72   10.90
 -20  -2  -8   22.13    4.24
  20   2   8   20.65   13.27
  20  -2   8   23.85    4.86
  20   2  -8   15.51    8.76
  20  -2  -8   25.39    5.84
 -20   2   8   23.49   10.89
  21   2  -8   12.79    8.09
 -21  -2  -8   17.05    4.34
  21   2   8   11.39    8.40
  21  -2   8   18.14    4.66
  21   2  -8   14.55    4.18
  21  -2  -8   14.80    8.28
 -21   2   8   11.33    6.88
   0   2  -9    1.96    2.48
   0  -2  -9    0.95    1.41
   0   2   9    1.35    1.50
   1   2  -9   37.83    5.76
  -1   2  -9   34.12    3.93
   1  -2  -9   36.05    3.16
  -1  -2  -9   39.46    3.46
  -1   2   9   38.90    6.10
   1   2   9   36.08    5.87
  -1   2   9   37.91    4.41
   2   2  -9  230.93   11.25
  -2   2  -9  253.01   11.66
   2  -2  -9  231.03   10.46
  -2  -2  -9  205.69    9.98
   2  -2   9  243.89   10.37
   2   2   9  223.05   10.95
  -2   2   9  219.33   11.62
   3   2  -9  110.75    7.19
  -3   2  -9  120.25    6.92
   3  -2  -9  106.07    8.69
  -3  -2  -9  106.58    6.10
   3  -2   9  118.06    5.72
   3   2   9  100.06    6.43
  -3   2   9  118.37    7.45
   4   2  -9   99.54    7.19
  -4   2  -9  109.01   11.27
   4  -2  -9  106.05    6.25
  -4  -2  -9   92.49    8.35
   4   2   9   93.74    7.59
   4  -2   9   98.87    5.51
  -4   2   9   95.58    6.33
   5   2  -9  533.09   22.53
   5  -2  -9  515.81   20.51
  -5   2  -9  543.78   21.99
  -5  -2  -9  549.17   22.29
   5   2   9  508.85   21.29
   5  -2   9  510.29   19.96
   5   2  -9  517.77   19.88
  -5   2   9  504.11   21.27
   6   2  -9   79.67    9.19
   6  -2  -9   71.44    5.51
  -6   2  -9   73.52    7.90
  -6  -2  -9   79.72   10.10
   6   2   9   76.35   10.23
   6  -2   9   65.57    6.22
   6   2  -9   70.56    6.74
  -6   2   9   71.61    6.45
   7   2  -9  110.23    7.40
   7  -2  -9  107.74   12.70
  -7   2  -9  113.10    5.83
  -7  -2  -9  107.56    9.70
   7   2   9  102.40    7.61
   7  -2   9  109.24    4.96
   7   2  -9  114.12    4.86
  -7   2   9  112.79    7.59
   8   2  -9    5.37    2.86
   8  -2  -9    5.71    2.06
  -8   2  -9    6.98    2.55
  -8  -2  -9    7.70    3.20
   8   2   9    9.20    3.50
   8  -2   9    5.75    1.92
   8   2  -9    5.83    2.55
  -8   2   9    9.68    3.66
   9   2  -9   74.70    6.20
   9  -2  -9   69.21    4.46
  -9   2  -9   72.76    7.71
  -9  -2  -9   64.77    4.68
   9   2   9   66.70   14.11
   9  -2   9   75.08    4.44
   9   2  -9   70.40    7.39
  -9   2   9   72.64    5.85
  10   2  -9   92.38    7.65
  10  -2  -9   97.74    7.10
 -10   2  -9  104.26    8.42
 -10  -2  -9   94.39   14.08
  10   2   9   94.81   15.50
  10  -2   9  103.19    7.03
  10   2  -9   96.54    7.19
 -10   2   9   91.58    7.51
 -10  -2   9   88.17    6.37
  11   2  -9   66.15   11.26
  11  -2  -9   64.16    8.77
 -11   2  -9   67.76    5.11
 -11  -2  -9   58.89    6.56
  11   2   9   73.34    6.47
  11  -2   9   72.66    5.25
  11   2  -9   63.42    6.89
 -11   2   9   70.05    6.50
 -11  -2   9   71.82    5.42
  12   2  -9    6.30    3.09
  12  -2  -9    3.95    1.63
 -12   2  -9    0.89    2.50
 -12  -2  -9    3.02    2.21
  12   2   9    1.82    2.38
  12   2  -9    2.65    1.71
 -12   2   9    6.64    3.74
  13   2  -9  947.39   19.28
  13  -2  -9  851.68   40.15
 -13   2  -9  971.83   14.90
 -13  -2  -9  953.17   16.67
  13   2   9  922.99   44.25
  13  -2   9  926.02   43.33
  13   2  -9  867.31   40.73
  13  -2  -9  946.48   16.49
 -13   2   9  880.75   46.67
 -13  -2   9  939.38   14.10
  14  -2  -9    0.20    1.16
 -14   2  -9    1.66    1.68
 -14  -2  -9    0.39    1.85
  14   2   9    0.91    3.42
  14  -2   9    0.09    1.68
  14   2  -9   -0.08    1.53
  14  -2  -9    2.38    2.58
 -14   2   9    0.04    2.19
 -14  -2   9    1.44    2.36
  15   2  -9   18.90   10.03
  15  -2  -9   14.43    3.32
 -15   2  -9   23.48    3.46
 -15  -2  -9   17.30    5.92
  15   2   9   18.93    4.18
  15  -2   9   16.65    3.47
  15   2  -9   15.32    3.75
  15  -2  -9   21.93    5.78
 -15   2   9   21.19    7.65
 -15  -2   9   15.68    5.97
  16   2  -9    9.59    6.53
 -16   2  -9   12.09    5.23
 -16  -2  -9    9.44    3.48
  16   2   9    7.62    3.72
  16  -2   9   13.82    3.64
  16   2  -9    9.96    4.29
  16  -2  -9   12.07    3.91
 -16   2   9   16.93    5.48
 -16  -2   9    7.87    2.49
  17   2  -9   65.00   17.42
 -17   2  -9   67.22   10.85
 -17  -2  -9   71.24    6.82
  17   2   9   74.69    8.15
  17  -2   9   67.47    9.63
  17   2  -9   70.65   10.67
  17  -2  -9   81.99    8.27
 -17   2   9   81.22   15.12
  18   2  -9   45.66   17.35
 -18   2  -9   54.45    5.12
 -18  -2  -9   53.30    6.14
  18   2   9   42.03    5.80
  18  -2   9   51.72    6.05
  18   2  -9   47.16   20.72
  18  -2  -9   47.27   13.05
 -18   2   9   49.52   13.82
  19   2  -9    7.06    3.39
 -19  -2  -9    7.23    4.12
  19   2   9    2.55    2.28
  19  -2   9    6.02    3.37
  19   2  -9    4.03    2.39
  19  -2  -9    4.44    3.72
 -19   2   9    5.55    3.99
  20   2  -9   18.74   12.88
 -20  -2  -9   40.22    8.47
  20   2   9   36.50    7.21
  20  -2   9   34.59   12.24
  20   2  -9   32.35   15.35
  20  -2  -9   44.04   15.44
 -20   2   9   41.75   12.27
 -21  -2  -9   62.47    8.60
  21   2   9   44.75    8.41
  21   2  -9   31.40   17.20
  21  -2  -9   58.05    9.65
   0   2 -10   61.27    5.31
   0  -2 -10   61.55    5.15
   0   2  10   60.36   14.58
   1   2 -10  547.85   15.56
  -1   2 -10  553.53   15.61
   1  -2 -10  516.60   14.08
  -1  -2 -10  512.43   14.34
  -1   2  10  514.51   14.90
   1   2  10  532.14   16.24
  -1   2  10  518.56   15.10
   2   2 -10  820.35   21.20
  -2   2 -10  759.90   19.13
   2  -2 -10  772.38   19.11
  -2  -2 -10  886.08   21.34
   2  -2  10  866.01   19.72
   2   2  10  783.07   21.47
  -2   2  10  811.41   20.59
   3   2 -10   35.16    5.34
  -3   2 -10   26.11    3.55
   3  -2 -10   32.94    3.74
  -3  -2 -10   28.47    8.24
   3  -2  10   31.81    6.02
   3   2  10   31.46    8.24
  -3   2  10   33.62    8.20
   4   2 -10   41.66    5.22
  -4   2 -10   49.53    4.36
   4  -2 -10   49.69    4.62
  -4  -2 -10   46.38    4.56
   4  -2  10   44.53    5.95
   4   2  10   46.43    9.39
  -4   2  10   47.81    4.66
   5   2 -10  158.12   15.65
   5  -2 -10  136.65    7.95
  -5   2 -10  140.40    7.82
  -5  -2 -10  151.12   12.82
   5   2  10  125.43    9.17
   5  -2  10  129.18    7.16
   5   2 -10  155.11   10.93
  -5   2  10  134.99   10.16
   6   2 -10    4.43    2.70
   6  -2 -10    2.98    2.20
  -6   2 -10    5.83    2.74
  -6  -2 -10    4.17    1.61
   6   2  10    5.73    3.13
   6  -2  10    2.98    1.30
   6   2 -10    4.68    2.51
  -6   2  10    5.24    2.93
   7   2 -10   70.02    9.07
   7  -2 -10   66.89    7.71
  -7   2 -10   74.14    4.77
  -7  -2 -10   65.82    5.34
   7   2  10   65.04   12.12
   7  -2  10   67.58   10.02
   7   2 -10   79.99    4.84
  -7   2  10   71.82   11.79
   8   2 -10    4.00    3.23
   8  -2 -10    2.70    1.46
  -8   2 -10    2.16    1.72
  -8  -2 -10    4.91    2.44
   8   2  10    3.53    2.99
   8  -2  10    1.83    1.39
   8   2 -10    2.41    1.34
  -8   2  10    5.51    3.26
   9   2 -10    3.62    2.18
   9  -2 -10    1.78    1.43
  -9   2 -10    1.21    1.95
  -9  -2 -10    1.99    1.89
   9   2  10    4.02    3.01
   9  -2  10    4.44    1.83
   9   2 -10    3.30    2.03
  -9   2  10    3.19    3.45
  10   2 -10   44.59    6.15
  10  -2 -10   44.37    4.91
 -10   2 -10   47.85    4.79
 -10  -2 -10   43.01    6.85
  10   2  10   36.10    9.17
  10  -2  10   45.20    4.25
  10   2 -10   40.15    7.08
 -10   2  10   47.21    5.54
 -10  -2  10   45.04   10.05
  11   2 -10  194.31   12.31
 -11   2 -10  197.39   13.45
 -11  -2 -10  188.60   11.29
  11   2  10  195.47   13.88
  11   2 -10  174.82   10.11
 -11   2  10  198.73   12.76
 -11  -2  10  183.96   10.71
  12   2 -10    2.90    3.02
  12  -2 -10    2.76    2.16
 -12   2 -10    1.50    1.96
 -12  -2 -10    1.48    2.39
  12   2  10    3.69    3.76
  12  -2  10    1.32    1.87
  12   2 -10    1.60    2.04
 -12   2  10    3.73    2.80
 -12  -2  10    2.09    2.47
  13   2 -10   12.77    6.42
  13  -2 -10   12.81    3.45
 -13   2 -10    7.62    2.29
 -13  -2 -10    9.36    2.59
  13   2  10   11.09    4.37
  13  -2  10    7.26    2.64
  13   2 -10    8.77    3.45
  13  -2 -10   10.60    5.43
 -13   2  10   12.00    4.40
 -13  -2  10   13.93    3.18
  14   2 -10  242.91   17.06
  14  -2 -10  229.24   14.79
 -14   2 -10  249.78   15.82
 -14  -2 -10  241.00   20.07
  14   2  10  255.93   17.68
  14  -2  10  239.35   15.32
  14   2 -10  238.45   15.64
  14  -2 -10  249.34   19.46
 -14   2  10  258.01   18.92
 -14  -2  10  253.53   16.10
  15   2 -10   45.84    7.61
  15  -2 -10   34.62    4.94
 -15   2 -10   33.03    4.66
 -15  -2 -10   29.56    5.01
  15   2  10   35.81    6.21
  15   2 -10   32.31    5.43
  15  -2 -10   35.65   11.83
 -15   2  10   30.54   14.27
 -15  -2  10   39.80    5.40
  16   2 -10  248.06   15.29
 -16   2 -10  264.39   14.04
 -16  -2 -10  247.72   22.00
  16   2  10  258.89   14.96
  16  -2  10  251.59   15.28
  16   2 -10  250.39   13.42
  16  -2 -10  284.04   16.39
 -16   2  10  269.10   16.91
 -16  -2  10  261.71   13.55
  17   2 -10    2.48    3.18
 -17   2 -10    3.57    2.12
 -17  -2 -10    2.14    2.95
  17   2  10    2.89    3.26
  17  -2  10    3.29    2.78
  17   2 -10    5.05    2.61
  17  -2 -10    5.07    4.06
 -17   2  10    3.01    3.22
  18   2 -10   17.34    6.69
 -18   2 -10   11.06    6.00
 -18  -2 -10   14.62    5.88
  18   2  10   10.90    3.88
  18   2 -10   16.97    4.99
  18  -2 -10   12.88    6.31
 -18   2  10   18.07    7.00
  19   2 -10   85.53   26.14
 -19  -2 -10   99.12   15.19
  19   2  10   90.21   12.28
  19  -2  10  100.02   12.39
  19   2 -10  101.80   12.79
  19  -2 -10  126.88   16.22
 -19   2  10  115.54   23.41
  20   2 -10   63.60   16.09
 -20  -2 -10   70.58   15.90
  20   2  10   63.88   16.22
  20   2 -10   76.26   10.31
  20  -2 -10   90.41   11.59
 -20   2  10   80.10   18.16
   0   2 -11    4.19    2.97
   0  -2 -11    1.06    2.25
   0   2  11    0.60    2.19
   1   2 -11    9.81    3.25
  -1   2 -11   12.94    4.06
   1  -2 -11   11.31    2.46
  -1  -2 -11   10.75    2.64
  -1   2  11    8.16    3.21
   1   2  11   10.73    3.70
  -1   2  11    7.95    2.64
   2   2 -11   82.22   10.84
  -2   2 -11   91.35   10.68
   2  -2 -11   76.86    6.61
  -2  -2 -11   74.86    5.40
   2   2  11   77.45   12.28
  -2   2  11   76.68    5.60
   3   2 -11   65.22    6.62
  -3   2 -11   60.47   10.79
   3  -2 -11   86.62    6.73
  -3  -2 -11   54.55    4.98
   3  -2  11   55.33    9.13
   3   2  11   61.68   10.49
  -3   2  11   65.96    5.39
   4   2 -11  154.75   11.03
  -4   2 -11  159.62   10.23
   4  -2 -11  150.78    9.82
  -4  -2 -11  147.73   11.07
   4  -2  11  150.93    9.52
   4   2  11  157.13   10.81
  -4   2  11  157.42   11.84
   5   2 -11    6.37    3.28
   5  -2 -11    8.73    2.83
  -5   2 -11    5.13    2.29
  -5  -2 -11    6.26    2.49
   5  -2  11    3.74    1.73
   5   2  11    4.84    2.50
  -5   2  11    6.72    3.13
   6   2 -11  280.93   16.95
   6  -2 -11  272.13   16.58
  -6   2 -11  291.16   13.90
  -6  -2 -11  254.54   15.03
   6   2  11  252.02   17.99
   6  -2  11  243.26   11.40
   6   2 -11  273.85   14.62
  -6   2  11  275.38   19.16
   7   2 -11   71.87    7.31
   7  -2 -11   70.71    6.07
  -7   2 -11   75.19   10.82
  -7  -2 -11   62.32    8.09
   7   2  11   71.18   17.99
   7  -2  11   64.87    5.82
   7   2 -11   60.97    7.53
  -7   2  11   71.95   12.97
  -8   2 -11   20.27    3.60
  -8  -2 -11   21.51    6.69
   8   2  11   19.83    8.09
   8  -2  11   15.58    7.41
   8   2 -11   22.66    2.95
  -8   2  11   25.03    9.68
   9   2 -11    7.45    3.81
   9  -2 -11    5.81    2.09
  -9   2 -11    6.64    2.71
  -9  -2 -11    8.10    2.97
   9   2  11    7.99    3.67
   9  -2  11    7.10    3.15
   9   2 -11    6.84    3.12
  -9   2  11    6.94    3.27
  10   2 -11    1.45    2.29
  10  -2 -11    1.59    1.94
 -10   2 -11    0.71    1.80
 -10  -2 -11    0.52    1.72
  10   2  11    1.27    1.71
  10   2 -11    0.19    0.77
 -10   2  11    0.73    2.02
 -10  -2  11    2.94    2.60
  11   2 -11   59.85    6.92
  11  -2 -11   54.61    5.29
 -11   2 -11   52.82    8.49
 -11  -2 -11   53.83    5.05
  11   2  11   51.33   10.01
  11  -2  11   40.15    4.17
  11   2 -11   54.14    5.34
 -11   2  11   60.85   14.91
 -11  -2  11   57.18    5.38
  12   2 -11  251.40   15.02
  12  -2 -11  223.88   11.93
 -12   2 -11  234.30   16.81
 -12  -2 -11  242.45   18.42
  12   2  11  249.26   14.83
  12  -2  11  174.32    9.84
  12   2 -11  236.05   11.97
 -12   2  11  237.46   17.13
 -12  -2  11  230.62   11.85
  13   2 -11  102.95   18.82
  13  -2 -11  104.87    8.20
 -13   2 -11  111.82   13.12
 -13  -2 -11  115.91    9.32
  13   2  11  101.92   12.23
  13  -2  11   85.74    6.94
  13   2 -11  103.57    8.97
  13  -2 -11  123.51   22.97
 -13   2  11  113.65   10.41
 -13  -2  11  113.27    9.05
  14   2 -11    2.19    3.16
  14  -2 -11    0.22    1.15
 -14   2 -11    1.07    1.20
 -14  -2 -11    0.78    2.10
  14   2  11    1.79    2.33
  14  -2  11    2.28    2.21
  14   2 -11    1.85    2.37
  14  -2 -11    3.18    2.80
 -14   2  11    2.12    2.84
 -14  -2  11    1.22    1.94
  15   2 -11   89.51   15.38
  15  -2 -11   91.47    7.15
 -15   2 -11   94.87    9.35
 -15  -2 -11   93.16    8.01
  15   2  11   69.86   15.64
  15  -2  11   84.71    7.32
  15   2 -11   83.75    6.82
  15  -2 -11   88.84    7.53
 -15   2  11   86.86   14.42
 -15  -2  11  100.83    7.57
  16   2 -11   18.62    9.82
 -16   2 -11   27.21    4.19
 -16  -2 -11   28.07    7.55
  16   2  11   25.39    4.91
  16   2 -11   25.18    4.33
  16  -2 -11   33.53    6.24
 -16   2  11   30.30    8.04
 -16  -2  11   16.67   10.14
  17   2 -11    2.77    3.36
 -17   2 -11    2.92    2.67
 -17  -2 -11    3.07    2.95
  17   2  11    3.55    2.31
  17  -2  11    3.48    2.72
  17   2 -11    4.68    2.63
  17  -2 -11    7.44    4.07
 -17   2  11    2.79    3.83
  18   2 -11    2.65    4.55
 -18   2 -11    1.69    2.53
 -18  -2 -11    0.37    2.83
  18   2  11    2.63    3.31
  18  -2  11    3.59    3.10
  18   2 -11    2.83    2.96
  18  -2 -11    2.08    2.83
 -18   2  11    3.57    3.92
 -19   2 -11    3.91    2.72
 -19  -2 -11    1.71    2.11
  19   2  11    3.41    3.23
  19  -2  11    3.44    2.65
  19   2 -11    2.85    3.96
  19  -2 -11    5.24    3.75
   0   2 -12  155.72   19.06
   0  -2 -12  130.60   15.75
   0   2  12  133.45    8.29
   1   2 -12   27.45    4.32
  -1   2 -12   30.17    4.69
   1  -2 -12   29.36    9.19
  -1  -2 -12   22.34    7.61
   1   2  12   24.53    9.62
  -1   2  12   28.55    4.13
   2   2 -12   13.89    5.56
  -2   2 -12   13.14    4.69
   2  -2 -12   13.50    3.39
  -2  -2 -12   11.96    3.30
   2   2  12   17.63    6.23
  -2   2  12   12.56    3.41
   3   2 -12  117.98    8.56
  -3   2 -12  116.06   11.18
   3  -2 -12  113.70    7.13
  -3  -2 -12  114.24   10.47
   3  -2  12  114.56    7.56
   3   2  12  113.90   11.25
  -3   2  12  131.99    8.97
   4   2 -12    6.57    2.87
  -4   2 -12   10.91    3.34
   4  -2 -12   12.99    3.92
   4  -2  12    6.58    3.99
   4   2  12   12.74    5.61
  -4   2  12    8.53    5.63
   5   2 -12  225.25   14.13
   5  -2 -12  193.47   11.35
  -5   2 -12  228.29   13.39
  -5  -2 -12  213.26   12.29
   5  -2  12  200.36   11.46
   5   2  12  204.66   18.71
  -5   2  12  213.70   13.25
   6   2 -12   97.25    8.78
   6  -2 -12   92.60    7.50
  -6   2 -12   93.79   10.25
  -6  -2 -12   93.49    7.70
   6  -2  12   89.38    9.78
   6   2  12   87.61   18.56
   6   2 -12   83.93    8.02
  -6   2  12  100.86    8.53
   7   2 -12   22.86    7.03
   7  -2 -12   25.06    4.08
  -7   2 -12   23.95    5.90
  -7  -2 -12   19.88    8.30
   7   2  12   23.02    9.34
   7  -2  12   15.32    4.94
   7   2 -12   15.88    6.32
  -7   2  12   24.78    5.01
   8   2 -12   13.02    3.92
   8  -2 -12   13.47    3.90
  -8   2 -12    7.11    3.19
  -8  -2 -12    9.44    2.72
   8   2  12    9.91    3.81
   8  -2  12    7.50    2.52
   8   2 -12    8.60    3.42
  -8   2  12   12.64    4.46
   9   2 -12  840.66   17.60
   9  -2 -12  823.27   14.08
  -9   2 -12  927.93   15.88
  -9  -2 -12  874.60   15.63
   9   2  12  802.17   35.33
   9  -2  12  728.23   30.44
   9   2 -12  736.58   30.21
  -9   2  12  886.16   17.75
  10   2 -12    4.20    4.11
  10  -2 -12    3.86    2.99
 -10   2 -12    0.29    1.95
 -10  -2 -12   -0.32    1.91
  10   2  12    3.42    3.38
  10  -2  12    2.05    1.94
  10   2 -12    4.40    2.21
 -10   2  12    1.37    2.27
 -10  -2  12    3.37    2.82
  11   2 -12   12.27    4.58
  11  -2 -12   13.93    3.54
 -11   2 -12   10.43    4.45
 -11  -2 -12   11.69    5.02
  11   2  12    9.55    5.06
  11  -2  12    7.44    3.75
  11   2 -12    6.97    3.00
 -11   2  12   15.95    4.68
 -11  -2  12    8.15    2.89
  12   2 -12  101.70   11.10
  12  -2 -12   99.96   10.00
 -12   2 -12   99.89    9.73
 -12  -2 -12  101.01   10.52
  12   2  12   77.19   11.25
  12  -2  12   72.82   12.74
  12   2 -12   84.09    8.35
 -12   2  12  110.04   11.27
 -12  -2  12   92.83    9.79
  13   2 -12    9.30    3.40
  13  -2 -12    7.52    4.78
 -13   2 -12   10.35    3.13
 -13  -2 -12   11.15    3.26
  13   2  12    9.44    4.80
  13  -2  12    9.21    2.73
  13   2 -12    8.29    3.90
 -13   2  12   14.95    4.36
 -13  -2  12    8.53    5.08
  14   2 -12  137.95   17.17
 -14   2 -12  141.67    9.10
 -14  -2 -12  131.07    8.69
  14   2  12  142.56    9.88
  14   2 -12   98.13    6.62
  14  -2 -12  155.09   11.31
 -14   2  12  140.60   12.12
 -14  -2  12  138.29   10.25
  15   2 -12   60.29   10.78
  15  -2 -12   62.52    6.99
 -15   2 -12   61.89    6.90
 -15  -2 -12   64.06    7.64
  15   2  12   44.95   16.33
  15  -2  12   53.87    5.92
  15  -2 -12   73.73   12.42
 -15   2  12   70.34   13.74
 -15  -2  12   72.80    7.35
  16   2 -12    1.30    2.29
 -16  -2 -12    3.26    3.24
  16   2  12    0.51    2.13
  16   2 -12    1.12    1.30
  16  -2 -12    3.14    3.27
 -16   2  12    0.15    2.43
 -16  -2  12   -0.10    1.49
 -17   2 -12   38.58    6.28
 -17  -2 -12   31.83    5.77
  17  -2 -12   47.54    9.12
   0   2 -13    1.58    2.65
   0  -2 -13    3.09    3.17
   0   2  13    0.58    1.69
   1   2 -13    0.86    1.90
  -1   2 -13    1.03    2.67
   1  -2 -13    0.73    2.30
  -1  -2 -13    3.57    3.29
   1   2  13    0.26    1.88
  -1   2  13    1.15    1.49
   2   2 -13  111.95    7.91
  -2   2 -13  106.70    7.46
   2  -2 -13  116.94   10.55
  -2  -2 -13  108.61   11.10
   2   2  13  110.61    7.78
  -2   2  13  122.66    7.90
   3   2 -13  100.78    8.36
  -3   2 -13   89.45    9.29
   3  -2 -13   90.61   13.77
  -3  -2 -13   97.72   16.12
   3   2  13  108.84   19.67
  -3   2  13  113.72    7.94
   4   2 -13    4.59    4.05
  -4   2 -13    2.38    2.40
   4  -2 -13    2.69    2.76
  -4  -2 -13    1.98    2.77
   4   2  13    1.50    1.76
  -4   2  13    4.57    3.12
   5   2 -13   40.13    6.13
   5  -2 -13   39.00    5.00
  -5   2 -13   37.24    5.09
  -5  -2 -13   33.88    5.68
   5   2  13   39.12   11.31
  -5   2  13   44.72    6.30
   6   2 -13   10.19    4.17
   6  -2 -13    5.72    2.83
  -6   2 -13    4.04    2.84
  -6  -2 -13    6.34    3.15
   6   2  13    7.78    3.88
  -6   2  13    7.42    3.65
   7   2 -13    2.83    3.22
  -7   2 -13    3.02    2.54
  -7  -2 -13    0.88    2.05
   7   2  13    3.14    3.02
  -7   2  13    5.19    4.57
   8   2 -13  218.68   15.82
   8  -2 -13  220.59   14.57
  -8   2 -13  236.04   15.87
  -8  -2 -13  203.75   14.44
   8   2  13  208.65   15.55
  -8   2  13  238.74   16.85
   9   2 -13    6.78    4.15
   9  -2 -13    6.47    2.72
  -9   2 -13    2.81    3.44
  -9  -2 -13    4.69    2.44
   9   2  13    3.37    3.69
  -9   2  13    6.21    3.24
  10   2 -13  217.70   19.66
  10  -2 -13  208.33   17.57
 -10   2 -13  237.49   26.59
 -10  -2 -13  207.44   24.99
  10   2  13  205.26   18.73
 -10   2  13  244.29   21.24
 -10  -2  13  215.45   18.08
  11   2 -13   38.87    6.96
  11  -2 -13   31.71    5.12
 -11   2 -13   37.17    5.34
 -11  -2 -13   29.12    5.14
  11   2  13   31.10   14.49
 -11   2  13   41.27    6.58
 -11  -2  13   34.64    4.34
  12   2 -13   33.03    6.02
  12  -2 -13   15.52   11.75
 -12   2 -13   22.69    4.85
 -12  -2 -13   28.68    7.15
  12   2  13   23.26   10.23
 -12   2  13   29.85   13.08
 -12  -2  13   28.46    4.70
  13   2 -13    6.70    3.71
  13  -2 -13    2.16    2.07
 -13   2 -13    3.29    2.79
 -13  -2 -13    4.10    2.31
  13   2  13    1.96    2.61
 -13   2  13    5.90    4.83
 -13  -2  13    5.58    3.77
  14   2 -13   14.36    9.68
  14  -2 -13   19.42    3.94
 -14   2 -13   17.07    4.41
 -14  -2 -13   13.94    6.90
  14   2  13   12.71    9.32
  14  -2 -13   20.17    4.71
 -14   2  13   26.65    5.72
 -14  -2  13   11.26    7.67
  15   2 -13   28.93   12.28
 -15   2 -13   25.25   12.80
 -15  -2 -13   33.81    6.71
  15   2  13   20.06   15.35
  15  -2 -13   29.31   14.27
 -15   2  13   35.00    6.97
 -15  -2  13   19.51   12.48
  16   2 -13   38.15    8.03
 -16   2 -13   42.24    6.74
 -16  -2 -13   45.65    7.28
  16   2  13   25.26   17.22
  16  -2 -13   40.26   12.76
 -16   2  13   61.83    9.50
 -16  -2  13   45.44    6.99
   0   2 -14  102.56    9.11
   0  -2 -14  106.54   11.47
   1   2 -14    2.68    2.20
  -1   2 -14    0.33    1.88
   1  -2 -14    2.68    2.76
  -1  -2 -14    1.46    2.40
   1   2  14    3.25    2.51
  -1   2  14    2.05    3.06
   2   2 -14   93.24    9.37
  -2   2 -14   81.03    7.61
   2  -2 -14   90.97    8.31
  -2  -2 -14   92.11    7.85
   2   2  14   90.08   11.54
  -2   2  14   87.68    7.79
   3   2 -14    7.65    3.91
  -3   2 -14    8.40    2.98
   3  -2 -14   10.10    3.47
  -3  -2 -14    6.26    3.94
   3   2  14    9.50    3.76
  -3   2  14    9.07    3.98
   4   2 -14   14.32    4.53
  -4   2 -14   17.53    5.96
   4  -2 -14   12.01    3.13
  -4  -2 -14   14.75    3.93
   4   2  14   16.73    8.37
  -4   2  14   15.53    7.98
   5   2 -14   25.93    6.49
   5  -2 -14   23.52    5.03
  -5   2 -14   16.42    7.09
  -5  -2 -14   16.69    4.20
   5   2  14   15.06    7.10
  -5   2  14   24.32    5.31
   6   2 -14    3.82    3.60
   6  -2 -14    3.06    2.61
  -6   2 -14    6.36    3.40
  -6  -2 -14    4.71    2.86
   6   2  14    2.35    2.81
  -6   2  14    7.94    3.76
   7   2 -14   -0.10    2.12
   7  -2 -14    2.11    2.48
  -7   2 -14    1.31    2.61
  -7  -2 -14    3.35    3.09
   7   2  14    4.76    4.16
  -7   2  14    3.95    4.98
   8   2 -14    3.59    4.09
   8  -2 -14    2.37    2.74
  -8  -2 -14    1.10    2.02
   8   2  14    2.29    2.59
  -8   2  14    3.87    4.66
   9   2 -14    4.94    3.74
   9  -2 -14    9.40    3.09
  -9   2 -14    7.90    4.04
  -9  -2 -14    5.43    3.59
   9   2  14    9.88    5.49
  -9   2  14    6.35    3.47
  10   2 -14   -0.14    2.27
  10  -2 -14    0.74    1.68
 -10   2 -14    2.29    2.62
 -10  -2 -14    2.39    3.32
  10   2  14    2.38    2.86
 -10   2  14    2.83    3.85
 -10  -2  14    4.69    2.72
  11   2 -14    3.25    4.35
  11  -2 -14    4.08    3.51
 -11   2 -14    0.08    1.66
 -11  -2 -14    0.51    2.06
  11   2  14    0.75    2.09
 -11   2  14    2.71    3.28
 -11  -2  14    2.31    3.72
  12   2 -14  374.77   14.27
  12  -2 -14  312.66   22.70
 -12   2 -14  431.85   13.38
 -12  -2 -14  364.00   24.19
  12   2  14  330.15   23.77
 -12   2  14  388.32   16.60
 -12  -2  14  354.46   21.43
  13   2 -14    3.54    2.60
  13  -2 -14    4.14    2.41
 -13   2 -14    4.80    2.45
 -13  -2 -14    6.00    3.45
  13   2  14    6.05    4.72
 -13   2  14   11.52    4.23
 -13  -2  14    4.52    2.90
  14   2 -14   11.98    5.24
  14  -2 -14    6.97    3.59
 -14  -2 -14    7.94    2.98
  14   2  14    7.56    6.00
  14  -2 -14    7.22    3.48
 -14   2  14    8.99    6.92
 -14  -2  14    4.05    4.28
   0  -2 -15   -0.49    1.74
   0   2  15    1.64    2.83
   1   2 -15    9.08    3.61
  -1   2 -15   11.63    3.80
   1  -2 -15    7.84    4.56
  -1  -2 -15    7.01    4.66
  -1   2  15    8.86    3.36
   2   2 -15   42.52    6.72
  -2   2 -15   41.56    8.00
   2  -2 -15   40.28    6.05
  -2  -2 -15   42.51    6.47
   2   2  15   42.45   10.44
  -2   2  15   53.25    8.10
   3   2 -15   10.83    3.68
  -3   2 -15    9.57    5.42
   3  -2 -15   10.81    3.17
  -3  -2 -15   13.22    3.76
   3   2  15    7.91    6.00
  -3   2  15   17.17    6.73
   4   2 -15   83.56    8.79
  -4   2 -15   74.69   14.70
   4  -2 -15   84.23   11.12
  -4  -2 -15   86.47    8.04
   4   2  15   78.08   14.97
  -4   2  15   88.80   11.48
   5   2 -15    2.39    3.04
   5  -2 -15    4.39    3.11
  -5   2 -15    2.56    2.21
  -5  -2 -15    1.47    2.86
   5   2  15    0.43    1.84
  -5   2  15    0.76    2.39
   6   2 -15   16.00    4.85
   6  -2 -15   10.48    3.03
  -6   2 -15    9.07    6.45
  -6  -2 -15   13.73    3.90
   6   2  15   13.37    6.91
  -6   2  15   12.09    4.69
   7   2 -15   19.52    6.24
   7  -2 -15   14.00    3.54
  -7   2 -15   15.74    4.51
  -7  -2 -15   15.42    3.96
   7   2  15   13.07    5.18
  -7   2  15   20.45    5.13
   8   2 -15  160.52   13.84
   8  -2 -15  137.25   11.14
  -8   2 -15  151.08   12.37
  -8  -2 -15  129.56   10.67
   8   2  15  148.28   13.20
  -8   2  15  159.54   14.17
   9   2 -15   23.57    5.42
   9  -2 -15   22.45    4.72
  -9   2 -15   17.38    4.71
  -9  -2 -15   21.22    8.30
  -9   2  15   27.50    5.81
  10   2 -15  234.61   19.34
  10  -2 -15  209.73   14.25
 -10   2 -15  232.54   20.71
 -10  -2 -15  214.90   14.77
 -10   2  15  248.01   17.80
 -10  -2  15  225.24   14.55
  11   2 -15    3.84    4.47
  11  -2 -15    4.62    3.30
 -11   2 -15    2.14    2.68
 -11  -2 -15    6.87    4.44
  11   2  15    3.31    4.11
 -11   2  15    7.72    3.73
 -11  -2  15    3.09    3.96
  12   2 -15   13.36    5.34
  12  -2 -15    9.00    7.40
 -12   2 -15   11.74    4.64
 -12  -2 -15    9.12    4.03
  12   2  15    6.70    4.25
 -12   2  15    9.65    6.71
 -12  -2  15    7.99    3.08
   0   2 -16   62.41    8.03
   0  -2 -16   56.27    7.68
   0   2  16   60.96    8.42
   1   2 -16   20.19    5.05
  -1   2 -16   25.48    6.28
   1  -2 -16   15.85    4.39
  -1  -2 -16   22.23    5.29
  -1   2  16   22.47    5.59
   1   2  16   20.71    5.14
   2   2 -16    3.23    2.66
  -2   2 -16    1.47    2.72
   2  -2 -16    1.59    1.59
  -2  -2 -16    0.88    2.24
  -2   2  16    1.71    3.86
   3   2 -16   16.80    4.71
  -3   2 -16   14.49    7.40
   3  -2 -16   17.90    7.90
  -3  -2 -16   27.28    5.27
   3   2  16   11.45    8.10
  -3   2  16   26.39    5.90
   4   2 -16    7.06    4.75
  -4   2 -16    1.21    1.59
   4  -2 -16    3.54    3.27
  -4  -2 -16    5.70    2.55
   4   2  16    5.26    4.81
  -4   2  16    4.31    4.21
   5   2 -16   96.26   10.17
   5  -2 -16   86.79   10.82
  -5   2 -16   87.87    9.09
  -5  -2 -16   83.73    9.44
   5   2  16   95.48   14.71
  -5   2  16  114.63   11.19
   6   2 -16   34.54    7.26
  -6   2 -16   25.04   11.30
  -6  -2 -16   22.35    8.62
   6   2  16   20.61   12.29
  -6   2  16   22.97   15.64
   7   2 -16   51.56   11.84
   7  -2 -16   62.73    9.36
  -7   2 -16   46.20   10.69
  -7  -2 -16   50.44   10.20
   7   2  16   54.66   16.00
  -7   2  16   61.03    9.33
   8   2 -16    7.66    5.41
   8  -2 -16   10.45    3.85
  -8   2 -16    9.90    3.95
  -8  -2 -16   12.49    4.39
   8   2  16   10.23    6.20
  -8   2  16   12.56    8.68
   9   2 -16  239.89   25.24
   9  -2 -16  208.92   21.36
  -9   2 -16  194.53   20.49
   9   2  16  205.06   22.46
  -9   2  16  244.94   25.28
  -9  -2  16  216.44   22.80
   0   2 -17    0.72    2.92
   0  -2 -17    1.52    2.51
   0   2  17    1.05    2.33
   1   2 -17    9.98    4.83
  -1   2 -17    8.09    3.67
   1  -2 -17    7.54    3.20
  -1  -2 -17    7.14    5.46
  -1   2  17    8.40    4.70
   1   2  17    8.83    5.78
  -2   2 -17    4.99    3.40
  -2  -2 -17    4.70    3.23
  -2   2  17    5.38    5.13
   2   2  17    2.33    2.29
   3   2 -17  108.44   13.95
  -3   2 -17  116.63   13.99
   3  -2 -17  104.46   14.02
  -3  -2 -17  118.60   13.54
  -3   2  17  115.05   14.50
   4   2 -17   12.82   10.75
  -4   2 -17   17.96    9.79
   4  -2 -17   13.47    7.48
  -4  -2 -17   16.88    4.37
   4   2  17   11.90   10.97
  -4   2  17   21.76    5.87
   0   3   0    1.43    1.56
   0   3   0    0.17    0.63
   0   3   0    0.42    1.27
  -1   3   0    0.35    0.95
   1   3   0    0.23    1.06
   1   3   0    0.51    0.72
   1   3   0    0.56    1.17
  -1   3   0    0.76    1.32
  -2   3   0   63.96    5.49
   2   3   0   61.38    5.92
   2   3   0   66.28    5.23
   2   3   0   59.61    4.05
  -2   3   0   53.29    5.96
  -3   3   0    0.92    0.89
   3   3   0    0.41    1.41
   3  -3   0    0.37    0.48
   3   3   0    0.12    0.76
  -3   3   0    0.72    1.08
  -4   3   0 2096.54   23.18
   4   3   0 2136.31   28.78
  -4   3   0 2009.30   26.16
   5   3   0    0.05    0.99
   5   3   0    1.22    1.81
  -5   3   0    0.78    1.06
  -5  -3   0    0.25    0.40
   6   3   0  964.38   20.83
   6   3   0  919.43   18.35
  -6   3   0  991.09   20.62
   7   3   0    1.58    2.14
   7   3   0    2.26    1.85
   7  -3   0    0.91    1.58
  -7   3   0   -0.12    2.00
   8   3   0  976.10   31.57
   8   3   0 1025.66   31.02
   8  -3   0 1076.04   32.34
  -8   3   0 1115.87   34.16
   9   3   0    0.94    1.70
   9   3   0    0.30    1.25
   9  -3   0   -0.19    1.42
  -9   3   0   -0.05    1.97
  10   3   0  508.33   16.46
  10   3   0  512.99   15.24
  10  -3   0  558.13   15.27
 -10   3   0  590.55   21.63
  11   3   0    0.28    1.68
  11   3   0    0.64    1.97
  11  -3   0    1.66    1.83
 -11   3   0   -0.38    1.99
  12   3   0  165.15   12.08
  12   3   0  177.94   15.86
  12  -3   0  184.17    9.87
 -12   3   0  218.78   15.73
  13   3   0    0.70    2.55
 -13   3   0    0.88    0.44
  13   3   0    3.07    4.64
  13  -3   0    1.63    3.14
 -13   3   0    1.59    2.75
  14   3   0  435.32   20.08
  14   3   0  436.35   20.25
  14  -3   0  473.78   20.23
 -14   3   0  394.08   18.86
  15   3   0    0.56    1.61
  15   3   0    0.75    2.51
  15  -3   0    4.35    4.22
 -15   3   0    0.11    1.28
  16   3   0  480.10   21.30
  16   3   0  497.66   22.29
  16  -3   0  554.28   23.35
 -16   3   0  569.62   24.55
  17   3   0    0.75    1.84
  17   3   0    2.45    2.58
  17  -3   0    3.26    3.18
 -17   3   0   -0.04    1.15
  18   3   0  195.91   13.49
  18   3   0  196.33   11.71
  18  -3   0  225.44   11.69
  19   3   0    3.67    3.62
  19   3   0    1.50    3.27
  19  -3   0    3.73    4.18
  20   3   0    1.98    3.30
  20   3   0    3.16    2.83
  20  -3   0    3.27    3.33
  21  -3   0    1.73    2.30
 -22  -3   0   30.53    9.28
  22   3   0   40.00    7.37
  22  -3   0   29.99   10.99
 -23  -3   0    1.38    3.02
  23   3   0    2.29    4.71
  23  -3   0    2.16    2.91
   0   3   1   72.05    5.95
   0   3  -1   69.98    7.05
   0   3  -1   69.03    3.90
   0   3   1   70.81    5.09
   0   3   1   61.22    4.12
  -1   3   1  333.70    5.15
   1   3   1  333.92    7.53
   1   3  -1  316.50    6.33
  -1   3  -1  319.33    6.53
  -1   3   1  349.92    6.06
   1   3  -1  331.79    4.45
   1   3   1  333.72    6.22
  -1   3   1  297.60    8.12
   2   3   1  304.58    7.11
   2   3  -1  275.87    6.02
  -2   3  -1  282.70    6.44
  -2   3  -1  268.27   11.36
   2   3   1  269.03    4.72
   3   3   1 1111.58   21.94
   3   3  -1 1022.80   20.39
   3  -3  -1 1067.54   18.76
  -3   3  -1 1104.67   19.92
   3  -3  -1 1068.26   18.65
   3   3   1 1050.87   20.19
   3   3  -1 1053.56   19.33
  -3   3  -1 1124.65   21.84
   3   3   1  975.40   18.03
  -3   3   1 1110.86   21.64
   4   3   1   31.98    5.71
   4   3  -1   35.89    5.38
  -4   3  -1   35.11    2.62
   4  -3  -1   36.86    2.43
   4  -3   1   31.92    2.24
   4  -3  -1   37.08    2.43
   4   3   1   32.62    3.09
   4   3  -1   35.11    3.12
  -4   3  -1   36.64    6.22
   4   3   1   33.21    3.13
  -4  -3   1   28.31    2.48
  -4   3   1   40.55    4.65
  -4  -3  -1   31.83    2.22
   5   3   1   16.06    2.99
   5   3  -1   18.96    5.98
  -5   3  -1   14.55    1.97
   5  -3   1   15.38    1.16
   5   3   1   14.87    2.54
   5   3  -1   17.01    2.29
   5  -3   1   17.37    2.06
  -5   3  -1   16.70    4.17
   5   3   1   16.32    2.43
  -5   3   1   18.75    4.07
   6   3   1 1259.53   25.42
   6   3  -1 1218.21   24.66
  -6   3  -1 1304.83   22.13
   6  -3   1 1309.07   22.03
   6   3   1 1279.11   24.48
   6   3  -1 1267.29   23.99
   6  -3   1 1317.40   23.87
  -6   3  -1 1335.35   26.31
  -6   3   1 1277.33   25.35
  -6  -3   1 1225.27   20.81
   7   3   1  295.37   10.52
   7   3  -1  297.98   11.71
   7   3   1  335.72    9.29
   7   3  -1  304.43    8.46
   7  -3   1  335.86    8.21
  -7   3  -1  284.41   10.32
  -7   3   1  303.80   12.04
   8   3   1  327.02   15.65
   8   3  -1  321.41   15.16
   8   3   1  309.23   11.26
   8   3  -1  329.07   11.70
   8  -3   1  356.54   11.89
   8  -3  -1  362.63   13.04
  -8   3  -1  335.24   15.04
  -8   3   1  356.05   16.35
   9   3   1  386.73   16.43
   9   3  -1  447.93   19.39
  -9   3  -1  427.65   12.16
   9   3   1  403.93   15.23
   9   3  -1  407.86   14.50
   9  -3   1  436.94   15.43
   9  -3  -1  440.39   14.93
  -9   3  -1  409.31   17.42
  -9   3   1  428.11   17.73
  10   3   1   28.92   10.44
  10   3  -1   32.73   10.00
 -10   3  -1   21.09    1.84
 -10   3  -1   23.18    0.88
  10   3   1   24.46    4.91
  10   3  -1   21.37    2.70
  10  -3   1   25.05    2.89
  10  -3  -1   27.66    3.03
 -10   3  -1   26.48    8.57
 -10   3   1   22.54    5.72
  11   3   1   61.31   10.85
  11   3  -1   58.19   11.42
  11   3   1   52.74    4.19
  11   3  -1   64.93    5.08
  11  -3   1   65.09    4.31
  11  -3  -1   65.74    4.24
 -11   3  -1   60.14    5.06
 -11   3   1   57.56    9.38
  12   3   1  186.78   10.17
  12   3  -1  170.47   13.43
  12   3   1  181.09   10.26
  12   3  -1  197.82   10.74
  12  -3   1  200.99   10.00
  12  -3  -1  186.05   10.81
 -12   3  -1  195.71   11.38
 -12   3   1  194.62   10.46
  13   3   1    0.73    1.43
  13   3  -1    2.72    2.15
 -13   3  -1    0.69    0.38
  13   3   1    1.20    2.27
  13   3  -1    4.29    3.18
  13  -3   1    2.95    1.82
  13  -3  -1    5.17    2.62
 -13   3   1    0.07    2.24
  14   3   1  193.76   12.71
  14   3  -1  191.15   14.75
  14   3   1  210.30   11.95
  14   3  -1  203.69   11.31
  14  -3   1  218.06   11.04
  14  -3  -1  217.72   11.11
 -14   3   1  226.25   15.88
  15   3   1  645.12   34.88
  15   3  -1  650.66   35.32
  15   3   1  669.84   36.01
  15   3  -1  614.57   32.91
  15  -3   1  708.01   36.89
  15  -3  -1  736.68   39.52
 -15   3   1  774.32   43.22
  16   3   1  187.86   11.14
  16   3  -1  184.18   16.55
  16   3   1  164.75   11.40
  16   3  -1  169.01   10.43
  16  -3   1  202.19   10.69
  16  -3  -1  192.29   10.86
 -16   3   1  227.20   13.42
  17   3   1    3.60    4.13
  17   3  -1    4.69    2.73
  17   3   1    1.42    3.42
  17   3  -1    5.76    3.50
  17  -3   1    4.23    3.21
  17  -3  -1    2.39    3.31
 -17   3   1    5.41    3.10
  18   3  -1    6.33    4.34
  18   3   1    6.02    3.11
  18   3  -1    6.60    3.79
  18  -3   1    4.96    3.40
  18  -3  -1    4.66    2.53
 -18   3   1    5.19    3.20
  19   3  -1   33.75   11.27
 -19  -3  -1   31.68    6.66
  19   3   1   28.81    5.56
  19   3  -1   37.33    7.01
  19  -3   1   33.62    7.96
  19  -3  -1   33.34    5.62
 -19   3   1   31.64   10.31
  20   3  -1    5.36    3.91
 -20  -3  -1    5.13    3.28
  20   3   1    6.46    3.49
  20   3  -1    7.96    4.77
  20  -3   1    7.26    3.94
  20  -3  -1    5.25    3.10
 -20   3   1    3.80    3.23
  21   3  -1   35.53   13.02
 -21  -3  -1   40.32    5.74
  21   3   1   47.11    7.80
  21   3  -1   44.81    7.12
  21  -3   1   42.94   14.42
  21  -3  -1   50.36    6.52
  22   3  -1   89.11   16.67
 -22  -3  -1  102.08   13.70
  22   3   1  105.90   11.69
  22   3  -1  126.18   12.72
  22  -3   1  109.79   13.41
  22  -3  -1  111.40   17.96
 -23  -3  -1    4.99    3.20
  23   3   1    5.23    4.76
  23   3  -1    6.48    4.87
  23  -3   1    2.10    2.87
  23  -3  -1    3.98    3.28
   0   3  -2    1.01    1.63
   0  -3  -2    0.54    1.45
   0   3   2   -0.14    1.04
   0  -3   2    0.61    0.52
   0   3   2    1.35    1.57
   1   3  -2  836.02    9.63
  -1   3  -2  803.71    8.40
  -1  -3  -2  868.30    9.12
  -1   3   2  861.28    9.26
   1   3   2  852.77    9.74
   1  -3   2  787.81    5.72
  -1   3   2  818.72    9.87
   1   3   2  816.66    9.20
   2   3  -2    7.52    2.21
  -2   3  -2    6.24    1.36
   2  -3  -2    6.39    1.09
  -2  -3  -2    9.58    2.95
   2   3   2    6.08    1.73
   2   3  -2    6.86    2.33
  -2   3   2    7.03    2.47
   2   3   2    9.87    3.19
   3   3  -2   95.70    6.08
  -3   3  -2  103.05    3.41
   3  -3  -2   88.15    2.97
   3   3   2   90.54    3.94
   3   3  -2   89.09    2.75
   3  -3   2   87.52    2.93
  -3   3   2   86.24    5.19
   3   3   2   91.09    3.21
   4   3   2   33.51    4.00
   4  -3  -2   28.23    3.01
   4   3  -2   33.49    5.91
  -4   3  -2   32.49    3.16
   4  -3  -2   32.94    3.24
   4   3   2   29.45    4.54
   4   3  -2   30.71    3.12
   4  -3   2   31.45    2.61
  -4   3   2   32.01    7.94
   4   3   2   32.25    4.24
   5   3   2  103.15    5.95
   5  -3  -2   97.15    2.53
   5   3  -2   96.21    6.58
  -5   3  -2  103.29    3.11
   5  -3  -2   99.85    1.87
   5   3   2  104.26    4.80
   5   3  -2  104.37    4.25
   5  -3   2  106.92    3.64
  -5   3   2  104.10   10.36
   5   3   2   84.53    3.00
   6   3   2    7.56    3.94
   6   3  -2    7.28    2.93
  -6   3  -2    4.31    0.96
   6   3   2    6.00    2.13
   6   3  -2    6.01    1.70
   6  -3   2    5.16    2.19
  -6   3   2    7.34    2.82
   6   3   2    3.88    0.81
   7   3   2   75.29    7.00
   7   3  -2   72.20    8.28
  -7   3  -2   75.13    2.90
   7   3   2   71.25    4.35
   7   3  -2   80.42    4.33
   7  -3   2   78.82    4.02
  -7   3   2   79.41    9.22
   7   3   2   63.15    1.99
   8   3   2   49.59    5.55
   8   3  -2   54.04    7.64
  -8   3  -2   48.16    2.10
   8   3   2   51.07    3.97
   8   3  -2   51.45    3.95
   8  -3   2   53.24    3.28
  -8   3   2   57.31    4.82
   8   3   2   43.28    1.16
  -8  -3   2   43.71    1.33
   9   3   2   30.85    6.02
   9   3  -2   28.89    6.16
   9   3   2   29.21    3.51
   9   3  -2   29.41    3.09
   9  -3   2   36.07    6.07
   9  -3  -2   30.85    5.01
  -9   3   2   31.81    8.70
  -9  -3   2   29.39    1.02
  10   3   2  116.68    7.47
  10   3  -2  122.48   19.01
 -10   3  -2  122.44    3.69
  10   3   2  117.67    6.89
  10   3  -2  117.28    9.70
  10  -3   2  121.81    6.45
  10  -3  -2  128.43    7.58
 -10   3   2  128.70    7.70
  11   3   2   48.21    6.33
  11   3  -2   47.22    8.82
 -11   3  -2   47.75    2.76
  11   3   2   53.56    6.04
  11   3  -2   49.20    9.41
  11  -3   2   52.81    4.48
  11  -3  -2   57.44    4.68
 -11   3   2   43.84    4.74
  12   3  -2   15.05    6.24
 -12   3  -2   12.28    1.14
  12   3   2   16.44    3.77
  12   3  -2   13.76    4.95
  12  -3   2   13.24    2.81
  12  -3  -2   17.77    3.90
 -12   3   2   12.56    7.68
  13   3  -2  147.06   11.30
  13   3   2  154.04    8.87
  13   3  -2  123.54    7.28
  13  -3   2  143.03    6.91
  13  -3  -2  170.72    7.84
 -13   3   2  159.87    8.86
  14   3  -2   32.55   10.44
  14   3   2   24.57    4.54
  14   3  -2   26.97    9.13
  14  -3   2   24.69    3.98
  14  -3  -2   22.60    5.46
 -14   3   2   29.57   10.25
  15   3  -2   53.30   17.64
 -15  -3  -2   54.86   14.91
  15   3   2   41.76    5.66
  15   3  -2   40.94    5.11
  15  -3   2   52.81    5.18
  15  -3  -2   54.25    6.35
 -15   3   2   47.65   11.01
  16   3  -2   55.28   12.00
 -16  -3  -2   75.37    7.19
  16   3   2   64.73    7.78
  16   3  -2   68.12    6.44
  16  -3   2   74.08    6.67
  16  -3  -2   77.92    8.00
 -16   3   2   59.85   10.61
  17   3  -2   11.78    4.79
 -17  -3  -2    8.16    4.43
  17   3   2    9.82    3.56
  17   3  -2   11.27    3.86
  17  -3   2    9.20    3.31
  17  -3  -2   11.35    6.39
 -17   3   2   13.50    5.42
  18   3  -2  133.32   12.40
 -18  -3  -2  131.96    9.31
  18   3   2  147.93   10.82
  18   3  -2  140.35   11.06
  18  -3   2  155.54   10.54
  18  -3  -2  157.30   10.33
 -18   3   2  149.89   14.70
  19   3  -2   79.86   16.52
 -19  -3  -2   91.30    8.98
  19   3   2   76.62    9.39
  19   3  -2   89.16    9.52
  19  -3   2   82.42   12.12
  19  -3  -2   86.04    8.51
 -19   3   2   81.65   16.69
  20   3  -2   31.14   10.81
 -20  -3  -2   26.89    5.59
  20   3   2   28.86    6.66
  20   3  -2   27.86    6.35
  20  -3   2   34.27    5.87
  20  -3  -2   25.78    5.06
 -20   3   2   27.04   12.74
  21   3  -2   38.75   16.41
 -21  -3  -2   45.08    6.37
  21   3   2   45.00    8.74
  21   3  -2   38.56   15.37
  21  -3   2   43.49    5.70
  21  -3  -2   48.12    6.11
 -21   3   2   36.48   10.50
  22   3  -2    3.05    2.75
 -22  -3  -2    5.06    4.29
  22   3   2    1.69    2.91
  22   3  -2    3.83    3.14
  22  -3   2    2.34    2.49
  22  -3  -2    5.93    3.62
 -22   3   2    1.80    3.39
  23   3  -2   34.26   11.28
 -23  -3  -2   41.68    7.31
  23   3   2   43.12   12.69
  23   3  -2   49.29    9.39
  23  -3   2   39.20   18.57
  23  -3  -2   50.07    9.95
   0   3  -3  686.76   14.05
   0  -3  -3  698.02   13.73
   0   3   3  763.34   15.84
   0   3   3  679.42   14.09
   1   3  -3  653.99   13.79
  -1   3  -3  627.84   13.05
   1  -3  -3  622.00   12.23
  -1  -3  -3  634.49   12.99
  -1   3   3  655.46   14.02
   1   3  -3  638.68   11.16
   1   3   3  640.74   14.96
   1  -3   3  587.79   10.28
  -1  -3   3  590.46   10.26
   1  -3   3  599.30   10.34
  -1   3   3  680.25   14.24
   1   3   3  620.56   13.11
   2   3  -3  115.59    8.92
  -2   3  -3  121.88    4.22
   2  -3  -3  107.82    3.36
  -2  -3  -3  111.61    4.26
   2   3   3   94.53    5.08
   2   3  -3   99.70    2.23
   2  -3   3  103.63    2.55
  -2   3   3  107.97    5.38
   2   3   3  110.65    4.22
   3   3  -3   26.82    3.76
  -3   3  -3   26.61    2.50
   3  -3  -3   24.52    2.14
  -3  -3  -3   24.35    2.92
   3   3   3   27.78    6.11
   3   3  -3   23.70    1.88
   3  -3   3   20.91    1.88
  -3   3   3   24.86    4.77
   3   3   3   24.82    3.90
   4   3  -3  341.85    9.23
  -4   3  -3  375.34    8.04
   4  -3  -3  357.96    7.05
  -4  -3  -3  341.45    8.99
   4   3   3  333.00   11.55
   4   3  -3  370.63    7.98
   4  -3   3  330.70    7.59
  -4   3   3  390.87   13.26
   4   3   3  344.97    7.76
   5   3  -3  134.09    6.01
  -5   3  -3  143.73    4.10
   5  -3  -3  143.69    3.80
  -5  -3  -3  131.88    5.62
   5   3   3  127.30    7.92
   5   3  -3  137.18    4.45
   5  -3   3  134.37    4.32
  -5   3   3  152.64    7.08
   5   3   3  130.26    4.21
   6   3  -3  215.46   10.24
  -6   3  -3  221.61    7.29
   6  -3  -3  215.70    6.55
  -6   3   3  191.40    6.03
  -6  -3  -3  221.45    8.97
   6   3   3  208.26    8.46
   6   3  -3  223.22    7.97
   6  -3   3  232.28    8.12
  -6   3   3  237.65   11.43
   6   3   3  213.05    7.51
   7   3  -3   76.64   10.83
  -7   3  -3   74.75    2.63
  -7   3   3   65.94    1.83
  -7  -3  -3   70.05    4.47
   7   3   3   77.97    6.79
   7   3  -3   76.52    4.44
   7  -3   3   73.96    3.43
  -7   3   3   80.75    5.58
   7   3   3   70.33    2.36
   8   3  -3  966.23   31.58
  -8   3  -3  957.30   27.40
  -8  -3  -3 1032.45   31.84
   8   3   3 1021.71   31.36
   8   3  -3  984.69   29.46
   8  -3   3 1045.39   30.95
  -8   3   3  997.76   30.83
   8   3   3  913.02   26.10
   9  -3  -3  443.22   10.33
   9   3  -3  505.37   15.81
  -9   3  -3  502.94   12.33
  -9   3   3  436.05   10.09
  -9  -3  -3  426.32   13.92
   9   3   3  466.57   15.45
   9   3  -3  520.61   14.72
   9  -3   3  553.54   16.25
  -9   3   3  522.04   17.34
  -9  -3   3  526.90   12.64
   9   3   3  457.38   11.14
  10   3  -3  487.03   16.74
 -10   3  -3  513.11   13.25
 -10  -3  -3  538.14   16.66
  10   3   3  559.51   16.87
  10   3  -3  500.69   15.05
  10  -3   3  572.45   15.90
  10  -3  -3  573.70   16.23
 -10   3   3  590.12   23.07
  11   3  -3    1.47    1.51
 -11  -3  -3    3.46    2.95
  11   3   3    4.04    2.77
  11   3  -3    1.13    2.93
  11  -3   3    1.76    2.32
  11  -3  -3    3.12    3.10
 -11   3   3    2.05    2.03
 -11  -3   3    1.19    0.52
  12   3  -3  371.16   16.91
 -12   3  -3  385.04    9.79
 -12  -3  -3  340.84   12.21
  12   3   3  359.80   12.72
  12   3  -3  364.67   12.73
  12  -3   3  420.57   17.18
  12  -3  -3  426.64   14.07
 -12   3   3  404.06   21.48
 -12  -3   3  368.54    8.75
  13   3  -3  276.32   13.45
 -13   3  -3  272.09    7.12
  13   3   3  275.84   10.99
  13   3  -3  241.91   10.35
  13  -3   3  290.55   10.05
  13  -3  -3  316.75   11.44
 -13   3   3  280.95   13.14
  14   3  -3  140.78   11.98
 -14   3  -3  130.22    5.79
 -14  -3  -3  144.95    9.26
  14   3   3  180.72   12.32
  14   3  -3  149.19   10.38
  14  -3   3  160.83    9.72
  14  -3  -3  179.64   10.43
 -14   3   3  150.52   15.43
  15   3  -3  337.82   22.24
 -15  -3  -3  338.18   19.58
  15   3   3  374.65   21.95
  15   3  -3  329.83   23.74
  15  -3   3  344.42   20.18
  15  -3  -3  379.13   21.29
 -15   3   3  345.08   22.30
  16   3  -3    2.03    3.07
 -16  -3  -3    1.09    1.68
  16   3   3    4.09    3.26
  16   3  -3    5.40    4.45
  16  -3   3    2.01    2.54
  16  -3  -3    0.89    1.32
 -16   3   3    2.30    2.62
  17   3  -3    3.25    3.05
 -17  -3  -3    2.90    1.85
  17   3   3    2.39    2.82
  17   3  -3    4.60    4.19
  17  -3   3    3.97    2.67
  17  -3  -3    4.69    3.27
 -17   3   3    6.57    3.29
  18   3  -3   99.91   17.80
 -18  -3  -3  114.19    8.89
  18   3   3  105.99    9.60
  18   3  -3  112.65    9.51
  18  -3   3  122.20    8.70
  18  -3  -3  125.02    9.40
 -18   3   3  110.39    9.10
  19   3  -3  254.28   21.74
 -19  -3  -3  275.07   19.94
  19   3   3  271.54   19.05
  19   3  -3  267.27   21.15
  19  -3   3  285.38   18.72
  19  -3  -3  288.49   19.57
 -19   3   3  267.93   19.07
  20   3  -3   91.14   22.79
 -20  -3  -3   98.16    9.25
  20   3   3   92.37   11.52
  20   3  -3   76.53   13.03
  20  -3   3   99.06    8.57
 -20   3   3  107.05   11.48
  21   3  -3    2.14    2.91
  21   3   3    0.88    2.82
  21   3  -3    0.73    2.09
  21  -3   3    4.09    2.18
  21  -3  -3    1.49    3.33
 -21   3   3    6.37    4.03
  22   3  -3   61.19   17.15
 -22  -3  -3   61.34   11.29
  22   3   3   69.59   11.51
  22   3  -3   70.11   10.37
  22  -3   3   68.26   15.84
  22  -3  -3   70.53   10.27
 -22   3   3   74.37   16.06
  23   3  -3   19.27    7.76
 -23  -3  -3   16.51    4.52
  23   3   3   17.56    5.89
  23   3  -3   13.93    4.40
  23  -3   3   12.48    7.55
  23  -3  -3   14.19    4.71
 -23   3   3    9.63    9.80
   0   3  -4    1.51    1.73
   0  -3  -4   -0.12    0.98
   0   3   4    0.15    1.50
   0   3   4    0.43    1.17
   1   3  -4  119.15    5.07
  -1   3  -4  136.49    4.90
   1  -3  -4  126.46    4.18
  -1  -3  -4  122.54    4.51
  -1   3   4  131.00    5.63
   1   3   4  123.44    5.97
  -1   3   4  123.27    5.11
   1   3   4  135.41    4.98
   2   3  -4  126.84    5.20
  -2   3  -4  136.93    4.77
   2  -3  -4  128.65    4.36
  -2  -3  -4  131.10    4.91
  -2   3   4  132.53    5.16
   2  -3   4  123.49    2.54
   2   3   4  121.63    4.94
   2   3  -4  114.08    2.40
   2  -3   4  123.21    2.51
  -2   3   4  129.85    5.10
   2   3   4  127.36    4.70
   3   3  -4   32.61    3.67
  -3   3  -4   30.89    3.09
   3  -3  -4   35.69    2.92
  -3  -3  -4   35.01    3.53
   3   3   4   34.91    4.59
   3   3  -4   34.42    2.40
   3  -3   4   34.41    2.43
  -3  -3   4   28.58    1.93
  -3   3   4   36.85    3.57
   3   3   4   32.26    3.09
   4   3  -4   41.24    5.09
  -4   3  -4   42.57    3.64
   4  -3  -4   38.26    3.49
  -4  -3  -4   37.91    3.31
   4   3   4   35.82    4.78
   4   3  -4   41.26    2.94
   4  -3   4   39.13    2.89
  -4   3   4   37.59    4.28
   4   3   4   39.70    3.40
   5   3  -4  722.72   22.86
  -5   3  -4  768.90   22.65
   5  -3  -4  784.93   22.56
  -5  -3  -4  743.31   23.22
   5   3   4  716.49   22.82
   5   3  -4  790.66   23.18
   5  -3   4  744.13   21.77
  -5   3   4  783.23   25.82
   5   3   4  742.62   22.02
   6   3  -4  355.08   13.10
  -6   3  -4  361.93   11.75
   6  -3  -4  368.29   11.00
  -6  -3  -4  360.63   13.16
   6   3   4  334.31   12.21
   6   3  -4  375.90   12.03
   6  -3   4  386.46   12.20
  -6   3   4  401.17   18.12
   6   3   4  357.05   12.20
   7   3  -4  293.23   11.48
   7  -3  -4  296.59    9.20
  -7   3  -4  304.42   10.09
  -7  -3  -4  291.49   11.48
   7   3   4  281.17   10.95
   7   3  -4  312.27   10.96
   7  -3   4  303.95   10.19
  -7   3   4  325.01   13.78
   7   3   4  270.96    9.23
   8   3  -4    3.40    2.78
  -8   3  -4    1.41    0.87
  -8  -3  -4    3.04    1.99
   8   3   4    0.79    0.75
   8   3  -4    0.75    1.36
   8  -3   4    2.63    1.33
  -8   3   4    1.36    2.53
   8   3   4    2.28    0.93
   9   3  -4    1.73    2.74
  -9   3  -4    1.54    1.33
  -9  -3  -4    3.41    2.56
   9   3   4    3.10    2.83
   9   3  -4    3.36    2.53
   9  -3   4    1.27    2.84
  -9   3   4    1.18    1.97
  -9  -3   4    1.25    1.15
  10   3  -4  128.60    8.94
  10  -3  -4  137.79    5.90
 -10   3  -4  129.30    6.78
 -10  -3  -4  139.58    8.75
  10   3   4  125.42    8.44
  10   3  -4  126.73    7.10
  10  -3   4  142.85    7.49
 -10   3   4  124.98    7.88
 -10  -3   4  133.14    5.95
  11   3  -4 1020.49   16.82
  11  -3  -4  878.29   32.33
 -11   3  -4 1031.94    8.94
 -11  -3  -4 1037.45   16.02
  11   3  -4  970.55   13.80
 -11   3   4 1051.51   17.35
 -11  -3   4 1061.94    9.49
  12   3  -4  111.10   13.80
 -12   3  -4  119.25    6.13
 -12  -3  -4  123.71    7.38
  12   3   4  116.51    7.50
  12   3  -4  106.23    6.55
  12  -3   4  127.94    6.35
  12  -3  -4  132.79    7.02
 -12   3   4  114.20   12.57
 -12  -3   4  112.28    3.99
  13  -3  -4  465.59   17.68
  13   3  -4  412.91   21.53
 -13   3  -4  462.45   17.77
 -13  -3  -4  466.98   20.62
  13   3   4  482.84   21.31
  13   3  -4  417.84   18.31
  13  -3   4  476.27   19.82
  13  -3  -4  496.97   21.58
 -13   3   4  441.76   21.81
 -13  -3   4  483.86   18.71
  14   3  -4    5.65    2.62
 -14   3  -4    5.85    1.70
 -14  -3  -4    5.50    2.95
  14   3   4    5.81    2.96
  14   3  -4    2.69    1.69
  14  -3   4    5.95    2.19
  14  -3  -4    6.31    2.14
 -14   3   4    6.72    2.83
  15   3  -4  174.49   24.90
 -15   3  -4  142.89    7.59
 -15  -3  -4  187.97   10.91
  15   3   4  173.77   10.47
  15   3  -4  162.18    9.58
  15  -3   4  171.53   11.09
  15  -3  -4  197.25   10.90
 -15   3   4  166.21   10.99
  16   3  -4   13.69    5.42
 -16  -3  -4   14.55    3.55
  16   3   4   12.27    3.63
  16   3  -4   12.44    4.32
  16  -3   4   17.37    5.32
  16  -3  -4   14.09    6.22
 -16   3   4   14.18    5.18
  17   3  -4    3.46    3.38
 -17  -3  -4    2.01    2.93
  17   3   4    1.99    2.36
  17   3  -4    3.34    3.85
  17  -3   4    1.40    1.95
  17  -3  -4    1.46    1.88
 -17   3   4    2.49    2.53
  18   3  -4   27.87   11.29
 -18  -3  -4   25.98   12.65
  18   3   4   24.91   10.36
  18   3  -4   27.55    5.78
  18  -3   4   26.22   11.15
  18  -3  -4   25.44    5.48
 -18   3   4   27.73   12.18
  19   3  -4  192.68   21.59
 -19  -3  -4  207.96   18.81
  19   3   4  189.26   17.39
  19   3  -4  192.30   16.94
  19  -3   4  201.22   17.52
  19  -3  -4  207.09   19.19
 -19   3   4  183.25   18.56
  20   3  -4   10.72    7.06
 -20  -3  -4   12.47    4.08
  20   3   4   10.79    3.75
  20   3  -4   11.56    4.43
  20  -3   4   10.43    4.58
  20  -3  -4   14.84    3.94
 -20   3   4   11.99    5.47
  21   3  -4    2.41    2.30
 -21  -3  -4    2.39    2.55
  21   3   4    2.31    3.50
  21   3  -4    3.03    3.30
  21  -3   4    2.06    2.22
  21  -3  -4    1.82    2.61
 -21   3   4   -0.23    1.71
  22   3  -4    1.43    3.79
 -22  -3  -4    1.18    3.55
  22   3   4    4.78    5.43
  22   3  -4    3.66    3.26
  22  -3   4    3.64    3.71
  22  -3  -4    5.13    3.48
 -22   3   4    0.54    2.97
  23   3  -4    2.72    2.87
 -23  -3  -4   -0.35    1.73
  23   3   4    3.95    4.39
  23   3  -4    3.61    3.58
  23  -3   4    2.89    2.88
  23  -3  -4    1.74    3.77
 -23   3   4    1.98    3.13
   0   3  -5  159.37    5.64
   0  -3  -5  164.82    5.26
   0   3   5  157.08    6.18
   0   3   5  186.42    6.22
   1   3  -5  438.64   10.67
  -1   3  -5  429.97   10.08
   1  -3  -5  398.51    9.00
  -1  -3  -5  397.10    9.36
  -1   3   5  368.04   10.05
   1   3   5  377.72   10.04
  -1   3   5  405.34   10.15
   1   3   5  414.05   10.29
   2   3  -5  122.25    5.93
  -2   3  -5  116.13    5.25
   2  -3  -5  100.72    4.43
  -2  -3  -5  102.06    4.89
  -2   3   5  114.04    5.79
   2   3   5   95.79    5.39
  -2   3   5  101.90    5.31
   2   3   5  103.57    5.69
   3   3  -5  205.77    8.62
  -3   3  -5  201.27    7.44
   3  -3  -5  201.69    6.99
  -3  -3  -5  194.80    7.73
   3   3   5  181.40    9.55
   3  -3   5  185.81    5.69
   3   3  -5  206.46    6.30
  -3   3   5  195.00    9.76
   3   3   5  198.72    7.54
   4   3  -5   18.97    2.73
  -4   3  -5   16.27    2.12
   4  -3  -5   19.89    3.24
  -4  -3  -5   18.79    2.52
   4   3   5   23.10    7.41
   4  -3   5   18.88    1.36
   4   3  -5   20.52    2.67
  -4   3   5   19.34    2.56
   4   3   5   18.17    2.06
   5   3  -5   26.32    5.13
  -5   3  -5   25.08    3.56
   5  -3  -5   21.59    1.72
  -5  -3  -5   21.91    2.67
   5   3   5   25.75    3.15
   5  -3   5   22.47    1.64
   5   3  -5   24.98    1.92
  -5   3   5   22.46    3.20
   5   3   5   22.39    1.94
   6   3  -5  357.27   13.28
  -6   3  -5  378.84   12.29
   6  -3  -5  365.85   11.24
  -6  -3  -5  358.75   12.93
   6   3   5  341.08   13.25
   6  -3   5  368.65   11.62
   6   3  -5  388.26   12.33
  -6   3   5  334.08   12.19
   6   3   5  327.67   10.77
   7   3  -5   17.85    3.91
   7  -3  -5   13.36    2.71
  -7   3  -5   14.13    1.96
  -7  -3  -5   15.03    4.56
   7   3   5   12.11    2.13
   7  -3   5   14.39    1.89
   7   3  -5   15.90    5.77
  -7   3   5   14.83    5.16
   8   3  -5  423.25   14.22
   8  -3  -5  515.99   12.77
  -8   3  -5  501.14   13.06
  -8  -3  -5  482.67   14.64
   8   3   5  520.56   15.72
   8   3  -5  511.19   14.49
  -8   3   5  484.08   19.83
   9   3  -5  335.56   15.65
   9  -3  -5  338.78   13.32
  -9   3  -5  373.07   14.84
  -9  -3  -5  357.07   15.96
   9   3   5  355.65   16.05
   9  -3   5  348.85   14.35
   9   3  -5  328.30   14.21
  -9   3   5  354.84   17.66
  10   3  -5   16.22    6.38
 -10   3  -5   15.40    1.99
 -10  -3  -5   13.95    3.82
  10   3   5   14.49    3.71
  10  -3   5   15.42    4.87
  10   3  -5   16.35    5.87
 -10   3   5   22.03    5.75
 -10  -3   5   13.41    3.87
  11   3  -5    2.95    2.71
  11  -3  -5    1.77    1.15
 -11   3  -5    0.70    0.97
 -11  -3  -5    1.27    2.87
  11   3   5    3.07    3.60
  11  -3   5    1.93    2.06
  11   3  -5    0.55    2.15
 -11   3   5    2.40    3.08
 -11  -3   5    1.43    1.32
  12   3  -5  465.14   23.93
 -12   3  -5  486.52   19.89
 -12  -3  -5  420.60   18.54
  12   3   5  423.24   18.95
  12  -3   5  468.99   19.17
  12  -3  -5  507.88   21.42
 -12   3   5  439.64   20.85
 -12  -3   5  492.13   19.04
  13   3  -5    7.76    3.50
  13  -3  -5    7.15    3.26
 -13   3  -5   10.61    3.14
 -13  -3  -5    9.47    2.71
  13   3   5   12.12    5.10
  13  -3   5   10.45    4.57
  13   3  -5   11.79    4.54
  13  -3  -5   11.40    5.06
 -13   3   5   12.32    4.36
 -13  -3   5   10.98    1.64
  14   3  -5    5.40    2.84
 -14   3  -5    5.13    1.41
 -14  -3  -5    3.60    2.24
  14   3   5    6.98    2.55
  14  -3   5    5.08    2.51
  14   3  -5    4.64    3.22
  14  -3  -5    5.90    3.09
 -14   3   5    4.97    3.03
 -14  -3   5    2.75    1.12
  15   3  -5   18.44    8.40
 -15   3  -5   11.27    1.72
 -15  -3  -5   10.13    3.16
  15   3   5   10.29    3.32
  15  -3   5   14.09    3.77
  15   3  -5   16.79    7.13
  15  -3  -5   16.36    4.81
 -15   3   5   18.24    5.68
  16   3  -5   30.83   10.98
 -16  -3  -5   23.43    4.30
  16   3   5   27.01    4.89
  16  -3   5   27.69    4.49
  16   3  -5   29.26   10.78
  16  -3  -5   31.86    6.23
 -16   3   5   32.50    9.70
  17   3  -5  305.34   21.25
 -17  -3  -5  323.16   16.62
  17   3   5  335.81   18.33
  17  -3   5  317.08   15.80
  17   3  -5  312.02   15.75
  17  -3  -5  311.06   18.61
 -17   3   5  287.83   17.88
  18   3  -5   31.35   13.85
 -18  -3  -5   32.52   13.12
  18   3   5   35.60    6.78
  18  -3   5   32.23    4.95
  18   3  -5   33.61    5.65
  18  -3  -5   31.70    5.26
 -18   3   5   37.06   12.30
  19   3  -5   67.00   19.99
 -19  -3  -5   49.21   11.30
  19   3   5   65.79    7.45
  19  -3   5   62.58   11.98
  19   3  -5   63.39    7.56
  19  -3  -5   63.10    9.25
 -19   3   5   61.02   14.93
  20   3  -5   26.46   10.80
 -20  -3  -5   31.86   12.90
  20   3   5   31.62    6.31
  20  -3   5   27.26   12.25
  20   3  -5   32.75    5.88
  20  -3  -5   37.72   12.35
 -20   3   5   29.73   12.99
  21   3  -5    6.44    4.44
 -21  -3  -5    5.56    4.53
  21   3   5    9.29    5.06
  21  -3   5    5.91    3.00
  21   3  -5    6.53    5.26
  21  -3  -5    9.16    3.79
 -21   3   5    6.35    3.66
  22   3  -5    7.68    7.50
 -22  -3  -5    5.58    2.89
  22   3   5    5.83    3.88
  22  -3   5    5.60    3.85
  22   3  -5    8.09    3.51
  22  -3  -5    5.72    2.98
 -22   3   5    8.06    6.79
   0   3  -6    1.07    1.23
   0  -3  -6    0.84    1.50
   0   3   6    0.43    1.63
   0   3   6    0.30    1.17
   1   3  -6    5.13    3.08
  -1   3  -6    5.40    1.89
   1  -3  -6    4.12    1.27
  -1  -3  -6    4.95    1.89
  -1   3   6    5.36    2.21
   1   3   6    7.68    2.65
  -1   3   6    4.57    1.38
   1   3   6    3.96    1.31
   2   3  -6  216.01    8.92
  -2   3  -6  213.94    8.14
   2  -3  -6  205.22    7.50
  -2  -3  -6  218.53    8.68
  -2   3   6  200.48    9.23
   2   3   6  188.50    8.31
  -2   3   6  193.24    8.09
   2   3   6  199.18    7.94
   3   3  -6  207.80    8.85
  -3   3  -6  223.88    8.52
   3  -3  -6  214.48    7.72
  -3  -3  -6  202.78    8.00
   3   3   6  196.32    9.05
   3   3  -6  223.98    6.80
  -3   3   6  210.88    8.51
   3   3   6  209.78    8.58
   4   3  -6  873.84   27.46
  -4   3  -6  861.86   25.83
   4  -3  -6  825.71   24.34
  -4  -3  -6  809.32   24.89
   4   3   6  819.25   26.58
   4  -3   6  892.90   25.53
   4   3  -6  942.91   27.01
  -4   3   6  810.65   25.42
   4   3   6  854.73   25.70
   5   3  -6    0.38    1.53
  -5   3  -6    2.20    1.95
   5  -3  -6    0.05    0.75
  -5  -3  -6    1.06    2.67
   5   3   6    0.85    1.32
   5  -3   6    0.34    0.99
   5   3  -6    2.64    1.54
  -5   3   6    2.82    2.93
   5   3   6    0.18    0.90
   6   3  -6   37.05    3.96
  -6   3  -6   34.21    4.66
   6  -3  -6   30.31    2.18
  -6  -3  -6   31.38    3.66
   6   3   6   33.76    9.89
   6  -3   6   36.43    2.38
   6   3  -6   31.34    2.39
  -6   3   6   32.30    3.45
   7   3  -6  104.21   12.09
   7  -3  -6  103.23    5.71
  -7   3  -6  114.88    4.87
  -7  -3  -6  113.17    5.99
   7   3   6  100.45    6.98
   7  -3   6  125.37    4.98
   7   3  -6  110.63    4.91
  -7   3   6   97.92    6.45
   8   3  -6    3.40    3.17
   8  -3  -6    3.29    1.75
  -8   3  -6    1.42    1.72
  -8  -3  -6    1.73    1.76
   8   3   6    2.04    3.57
   8   3  -6    0.38    1.66
   9   3  -6   22.58    5.15
   9  -3  -6   20.90    2.17
  -9   3  -6   25.01    6.34
  -9  -3  -6   18.95    3.53
   9   3   6   20.14    4.03
   9  -3   6   22.06    6.69
   9   3  -6   18.33    2.80
  -9   3   6   23.14    6.60
  10   3  -6    0.99    2.35
  10  -3  -6    0.69    1.08
 -10  -3  -6    0.13    1.88
  10   3   6    3.94    3.25
  10  -3   6    0.87    1.41
  10   3  -6    2.16    1.95
 -10   3   6    0.61    1.79
 -10  -3   6    1.75    1.32
  11   3  -6  112.61   16.09
 -11   3  -6  102.22    5.53
 -11  -3  -6  108.22    8.01
  11   3   6  102.87    7.46
  11  -3   6  109.50    6.70
  11   3  -6  100.53    6.40
 -11   3   6  115.62   13.45
 -11  -3   6  104.64    5.66
  12   3  -6   16.71    6.16
  12  -3  -6   12.78    4.87
 -12   3  -6   16.83    2.20
 -12  -3  -6   14.76    4.10
  12   3   6   14.04    4.46
  12  -3   6   16.37    4.56
  12   3  -6   16.50    3.14
 -12   3   6   14.96    5.17
 -12  -3   6   15.31    4.95
  13   3  -6    4.92    4.57
 -13   3  -6    0.93    0.74
 -13  -3  -6    1.83    1.85
  13   3   6    2.96    3.21
  13  -3   6    1.90    2.17
  13   3  -6    2.16    2.50
  13  -3  -6    4.72    3.61
 -13   3   6    4.66    2.85
 -13  -3   6    2.07    0.96
  14   3  -6   97.47   17.86
 -14   3  -6   90.87    6.58
 -14  -3  -6   95.29    7.21
  14   3   6   91.91    8.06
  14  -3   6   90.10    6.45
  14  -3  -6   95.16   10.28
 -14   3   6   91.51   14.26
 -14  -3   6   89.67    5.01
  15   3  -6  194.48   13.36
 -15   3  -6  205.33   11.69
 -15  -3  -6  207.86   12.77
  15   3   6  215.78   13.90
  15  -3   6  199.39   11.81
  15   3  -6  217.85   13.49
  15  -3  -6  219.74   13.77
 -15   3   6  198.41   18.76
  16   3  -6    5.20    2.88
 -16   3  -6    3.62    1.49
 -16  -3  -6    4.77    2.77
  16   3   6    6.50    4.44
  16  -3   6    6.36    3.20
  16   3  -6    5.97    2.87
  16  -3  -6    6.43    3.12
 -16   3   6    9.63    3.51
  17   3  -6   44.32   14.17
 -17  -3  -6   35.95   10.30
  17   3   6   41.53    8.79
  17  -3   6   38.65    9.53
  17   3  -6   37.64   14.78
  17  -3  -6   50.99    7.13
 -17   3   6   49.59   13.38
  18   3  -6   21.55   10.18
 -18  -3  -6   13.70    5.60
  18   3   6   13.56    4.35
  18  -3   6   13.67    3.35
  18   3  -6   11.99    6.64
  18  -3  -6   17.58    5.18
 -18   3   6   17.02    6.69
  19   3  -6  125.80   18.38
 -19  -3  -6  136.37    9.85
  19   3   6  141.65   15.78
  19  -3   6  136.70    9.69
  19   3  -6  144.63   11.57
  19  -3  -6  137.27   10.26
 -19   3   6  131.27   10.72
  20   3  -6   50.32   14.04
 -20  -3  -6   56.11    7.11
  20   3   6   42.65   14.36
  20  -3   6   44.37    9.56
  20   3  -6   40.18   17.68
  20  -3  -6   53.83    7.24
 -20   3   6   59.59   19.29
  21   3  -6   12.53    6.30
 -21  -3  -6    5.80    4.75
  21   3   6    7.52    4.23
  21  -3   6    6.12    3.75
  21   3  -6    8.70    3.86
  21  -3  -6   13.26    5.50
 -21   3   6    7.35    3.23
  22   3  -6   71.07   31.81
 -22  -3  -6  108.20   12.48
  22  -3   6   82.85    9.81
  22  -3  -6   98.25   14.74
 -22   3   6   83.74   19.79
   0   3  -7    1.82    2.00
   0  -3  -7    3.09    1.29
   0   3   7    2.02    1.48
   0   3   7    3.70    1.75
   1   3  -7  482.06   14.07
  -1   3  -7  536.17   14.89
   1  -3  -7  502.33   13.53
  -1  -3  -7  489.79   13.45
  -1   3   7  469.22   14.54
   1   3   7  506.71   15.61
  -1   3   7  474.01   14.68
   1   3   7  495.18   14.04
   2   3  -7  508.67   14.98
  -2   3  -7  534.73   14.73
   2  -3  -7  508.43   13.64
  -2  -3  -7  502.05   14.20
  -2   3   7  489.88   16.67
   2   3   7  496.85   18.47
  -2   3   7  494.23   14.50
   2   3   7  482.05   15.79
   3   3  -7   98.72    5.72
  -3   3  -7  111.02    5.26
   3  -3  -7  107.45    4.60
  -3  -3  -7  105.40    6.07
   3  -3   7   99.27    2.97
   3   3   7  100.10    7.26
   3   3  -7   83.27    2.61
  -3   3  -7   92.04    3.00
  -3   3   7  103.37    5.67
   3   3   7  101.94    5.40
   4   3  -7    3.22    1.86
  -4   3  -7    4.96    2.01
   4  -3  -7    3.83    1.72
  -4  -3  -7    4.20    2.29
   4   3   7    4.87    2.41
   4  -3   7    2.54    0.70
   4   3  -7    2.09    0.74
  -4   3   7    3.73    1.90
   4   3   7    3.85    1.49
   5   3  -7  520.32   15.87
  -5   3  -7  586.97   15.65
   5  -3  -7  590.12   15.32
  -5  -3  -7  585.59   16.47
   5   3   7  523.93   15.89
   5  -3   7  578.94   14.18
   5   3  -7  520.03   13.18
  -5   3   7  522.60   16.41
   6   3  -7   30.29    4.58
  -6   3  -7   25.77    5.06
   6  -3  -7   26.43    2.98
  -6  -3  -7   26.48    3.04
   6   3   7   28.44   10.86
   6  -3   7   24.32    2.02
   6   3  -7   21.80    3.32
  -6   3   7   23.68    3.28
   7   3  -7  492.69   21.14
   7  -3  -7  520.16   20.12
  -7   3  -7  484.44   19.17
  -7  -3  -7  453.57   18.95
   7   3   7  459.23   20.20
   7  -3   7  521.20   20.16
   7   3  -7  455.25   18.03
  -7   3   7  441.60   21.31
   8   3  -7  116.25   14.68
   8  -3  -7  106.97    7.35
  -8   3  -7  111.85    6.59
  -8  -3  -7   98.68    6.49
   8   3   7  109.12   16.17
   8  -3   7  124.38    5.21
   8   3  -7  105.19    5.05
  -8   3   7  110.09    6.77
   9   3  -7  115.94   12.57
  -9   3  -7  108.64    7.61
  -9  -3  -7   88.78    6.60
   9   3   7   82.73   11.88
   9  -3   7  108.91    5.22
   9   3  -7  103.92    5.35
  -9   3   7   94.94    7.19
  10   3  -7  155.39   10.26
  10  -3  -7  150.38    7.38
 -10   3  -7  163.84   10.20
 -10  -3  -7  151.10   12.46
  10   3   7  151.95    9.35
  10  -3   7  165.96    8.31
  10   3  -7  153.00    8.16
 -10   3   7  134.90    9.04
  11   3  -7  411.22   24.90
  11  -3  -7  409.29   21.09
 -11   3  -7  421.96   22.04
 -11  -3  -7  436.64   24.93
  11   3   7  403.43   22.77
  11  -3   7  447.08   23.51
  11   3  -7  442.62   23.54
 -11   3   7  387.97   23.95
 -11  -3   7  418.19   21.78
  12   3  -7   63.34   18.09
 -12   3  -7   56.99    3.75
 -12  -3  -7   58.01   10.67
  12   3   7   54.31    6.40
  12  -3   7   61.91    4.40
  12   3  -7   60.76   11.49
 -12   3   7   73.62   17.63
 -12  -3   7   61.50    4.02
  13   3  -7  130.35   24.72
  13  -3  -7  122.70    6.21
 -13   3  -7  135.50    7.01
 -13  -3  -7  148.23   13.02
  13   3   7  123.73    8.97
  13   3  -7  129.29    8.05
  13  -3  -7  143.67   10.11
 -13   3   7  141.25   14.11
 -13  -3   7  128.97    6.86
  14   3  -7   11.54    4.12
 -14   3  -7   11.22    2.47
 -14  -3  -7    8.42    2.95
  14   3   7    9.30    4.10
  14  -3   7    9.77    2.96
  14   3  -7    8.81    3.86
  14  -3  -7    7.68    2.73
 -14   3   7   15.47    4.28
 -14  -3   7    7.76    2.12
  15   3  -7    4.69    4.11
 -15   3  -7    2.79    1.20
 -15  -3  -7    4.68    3.15
  15   3   7    3.97    3.62
  15  -3   7    1.94    1.50
  15   3  -7    2.45    1.60
  15  -3  -7    3.64    2.55
 -15   3   7    7.84    3.71
  16   3  -7   67.08   20.34
 -16  -3  -7   60.10    6.30
  16   3   7   54.47    7.82
  16  -3   7   60.13    5.59
  16   3  -7   60.30    5.95
  16  -3  -7   76.87    7.86
 -16   3   7   71.29   20.30
  17   3  -7  357.94   30.14
 -17  -3  -7  383.58   11.87
  17   3   7  386.96   13.48
  17  -3   7  361.63   28.96
  17   3  -7  379.69   11.19
  17  -3  -7  372.28   12.15
 -17   3   7  334.63   36.14
  18   3  -7    1.10    2.30
 -18  -3  -7    1.32    1.97
  18   3   7    1.45    2.79
  18  -3   7    1.71    2.79
  18   3  -7    1.54    3.05
  18  -3  -7    1.23    3.40
 -18   3   7    1.38    1.73
  19   3  -7   35.88   14.75
 -19  -3  -7   41.13   15.35
  19   3   7   33.27   17.37
  19  -3   7   48.78    6.00
  19   3  -7   38.82   13.71
  19  -3  -7   38.27   20.78
 -19   3   7   51.70   14.89
  20   3  -7    6.98    4.48
 -20  -3  -7    6.38    3.70
  20   3   7    4.07    3.65
  20  -3   7    3.63    2.98
  20   3  -7    5.66    3.72
  20  -3  -7    7.54    3.20
 -20   3   7    5.81    3.32
  21   3  -7   16.16   10.05
 -21  -3  -7   17.10   12.80
  21   3   7   18.41    5.98
  21  -3   7   17.29    4.95
  21   3  -7   10.84    7.93
  21  -3  -7   21.47    6.52
 -21   3   7   17.97   11.36
   0   3  -8    1.35    2.01
   0  -3  -8    0.18    1.11
   0   3   8    1.78    2.21
   0   3   8    1.28    1.95
   1   3  -8   51.93    7.10
  -1   3  -8   52.93    4.97
   1  -3  -8   53.24    3.85
  -1  -3  -8   48.67    3.32
  -1   3   8   47.73    5.52
   1   3   8   48.03    8.70
  -1   3   8   52.27    4.68
   1   3   8   48.87    7.71
   2   3  -8   20.73    3.64
  -2   3  -8   23.74    3.65
   2  -3  -8   24.02    2.71
  -2  -3  -8   25.36    7.08
   2   3   8   24.52    6.78
   2   3  -8   15.95    1.81
  -2   3  -8   11.14    0.75
  -2   3   8   20.57    3.24
   2   3   8   21.14    3.30
   3   3  -8  202.52   10.62
  -3   3  -8  214.75   10.10
   3  -3  -8  213.48    9.65
  -3  -3  -8  201.00    9.51
   3  -3   8  213.99    8.36
   3   3   8  191.41   10.20
   3   3  -8  178.38    7.42
  -3   3   8  186.64   12.10
   3   3   8  198.07    9.55
   4   3  -8    1.94    1.69
  -4   3  -8    1.05    1.84
   4  -3  -8    1.98    1.08
  -4  -3  -8    1.64    1.53
   4   3   8    1.62    2.18
   4  -3   8    1.86    0.76
   4   3  -8    2.18    1.21
  -4   3   8    2.94    2.94
   4   3   8    1.75    2.22
   5   3  -8   37.61    4.77
  -5   3  -8   39.42    3.73
   5  -3  -8   37.61    5.09
  -5  -3  -8   41.81    7.26
   5   3   8   40.79    5.70
   5  -3   8   34.85    2.93
   5   3  -8   36.49    2.22
  -5   3   8   34.44    4.06
   6   3  -8   35.76    5.08
  -6   3  -8   38.83    5.39
   6  -3  -8   36.54    4.57
  -6  -3  -8   41.63    8.91
   6   3   8   40.80   13.35
   6  -3   8   29.92    2.10
   6   3  -8   37.29    2.69
  -6   3   8   42.63    4.69
   7   3  -8   41.91    5.74
   7  -3  -8   35.98    3.34
  -7   3  -8   34.32    6.65
  -7  -3  -8   41.38    7.42
   7   3   8   33.67    8.58
   7  -3   8   33.79    2.40
   7   3  -8   35.62    4.86
  -7   3   8   37.82    4.67
   8   3  -8  279.08   14.17
   8  -3  -8  259.60   11.10
  -8   3  -8  289.73   12.90
  -8  -3  -8  286.06   14.05
   8   3   8  301.95   14.97
   8  -3   8  291.52   12.27
   8   3  -8  308.39   13.23
  -8   3   8  256.06   15.23
   9   3  -8    0.47    2.35
   9  -3  -8    1.61    1.55
  -9   3  -8    2.80    2.61
  -9  -3  -8    1.48    2.16
   9   3   8    2.91    2.80
   9   3  -8    1.36    2.10
  -9   3   8    2.42    3.03
  10   3  -8  643.26   34.72
  10  -3  -8  597.66   30.34
 -10   3  -8  747.01   38.16
 -10  -3  -8  549.52   29.59
  10   3   8  582.55   31.96
  10  -3   8  661.29   33.71
  10   3  -8  648.75   33.23
 -10   3   8  605.12   32.65
  11   3  -8    2.72    4.21
  11  -3  -8    4.70    2.21
 -11   3  -8    3.89    1.87
 -11  -3  -8    3.96    2.75
  11   3   8    3.39    3.88
  11  -3   8    2.85    1.72
  11   3  -8    1.97    1.30
 -11   3   8    2.25    2.88
 -11  -3   8    3.68    2.20
  12   3  -8   26.11    5.22
  12  -3  -8   20.81    5.96
 -12   3  -8   26.71    7.01
 -12  -3  -8   28.74    6.20
  12   3   8   22.50    6.68
  12  -3   8   26.20    3.60
  12   3  -8   18.98    7.02
 -12   3   8   28.84    8.92
 -12  -3   8   24.97    3.01
  13   3  -8   44.96   17.16
  13  -3  -8   42.31    3.98
 -13   3  -8   44.81    4.21
 -13  -3  -8   42.18    5.82
  13   3   8   43.97    5.58
  13  -3   8   44.83    7.19
  13   3  -8   44.31   12.96
 -13   3   8   45.52    7.51
 -13  -3   8   47.18    4.26
  14   3  -8    7.44    3.58
 -14  -3  -8    6.84    2.44
  14   3   8    8.09    3.69
  14   3  -8    6.16    2.06
  14  -3  -8    8.73    3.81
 -14   3   8    7.19    4.62
 -14  -3   8    4.68    1.72
  15   3  -8    8.69    4.59
 -15   3  -8    6.81    2.27
 -15  -3  -8    5.89    2.95
  15   3   8    6.95    3.02
  15  -3   8    6.55    2.55
  15   3  -8    4.30    1.81
  15  -3  -8    5.48    3.55
 -15   3   8    8.62    3.33
  16   3  -8   59.68   13.27
 -16   3  -8   53.47    8.46
 -16  -3  -8   63.95    6.61
  16   3   8   50.72    6.73
  16  -3   8   62.01    6.40
  16   3  -8   53.48   17.17
  16  -3  -8   57.27   17.50
 -16   3   8   71.34   19.71
  17   3  -8    7.72    4.33
 -17  -3  -8    5.58    2.85
  17   3   8    6.57    3.60
  17  -3   8    4.54    3.09
  17   3  -8    7.98    3.18
  17  -3  -8    6.62    3.52
 -17   3   8    2.84    2.82
  18   3  -8   64.50   16.87
 -18  -3  -8   58.71    6.24
  18   3   8   67.67    7.44
  18  -3   8   59.72    6.47
  18   3  -8   61.31    6.08
  18  -3  -8   67.75    7.94
 -18   3   8   56.13   12.80
  19   3  -8    4.78    2.79
 -19  -3  -8    1.95    2.83
  19   3   8    1.43    2.40
  19  -3   8    2.75    2.50
  19   3  -8    1.49    2.66
  19  -3  -8   -0.18    2.38
 -19   3   8    1.95    2.05
  20   3  -8   16.25   10.87
 -20  -3  -8   19.04    4.80
  20   3   8   22.26    5.90
  20  -3   8   24.43    5.49
  20   3  -8   11.43    5.23
  20  -3  -8   19.85    7.60
 -20   3   8   18.81    9.99
 -21  -3  -8    7.60    3.65
  21   3   8    6.53    4.31
  21   3  -8    5.78    6.24
  21  -3  -8   10.24    4.18
   0   3  -9  161.03    7.25
   0  -3  -9  162.14    6.47
   0   3   9  164.56    8.02
   0   3   9  174.41    7.45
   1   3  -9   72.23    5.09
  -1   3  -9   72.37    5.19
   1  -3  -9   73.41    4.32
  -1  -3  -9   73.69    4.42
  -1   3   9   72.00    9.92
   1   3   9   73.88    8.73
   1   3  -9   65.80    2.27
  -1   3   9   70.90    5.37
   1   3   9   66.53    5.74
   2   3  -9    8.65    2.70
  -2   3  -9    8.52    3.13
   2  -3  -9    7.37    2.47
  -2  -3  -9   10.07    3.42
   2   3   9   12.79    4.84
   2   3  -9    5.20    1.53
  -2   3   9    8.60    2.38
   2   3   9   10.61    3.05
   3   3  -9   52.24    6.56
  -3   3  -9   60.53    7.94
   3  -3  -9   55.04    5.54
  -3  -3  -9   52.93    3.93
   3  -3   9   52.39    4.18
   3   3   9   50.10    8.81
   3   3  -9   59.18    2.76
  -3   3   9   54.08    5.53
   3   3   9   51.23    4.08
   4   3  -9   40.13    5.36
  -4   3  -9   28.81    3.51
   4  -3  -9   32.52    5.32
  -4  -3  -9   28.85    3.44
   4  -3   9   27.56    4.63
   4   3   9   29.76    5.39
  -4   3   9   38.10   10.69
   5   3  -9  413.71   13.33
  -5   3  -9  424.68   12.58
   5  -3  -9  465.27   12.85
  -5  -3  -9  395.62   12.32
   5   3   9  380.22   13.06
   5  -3   9  361.66    8.99
  -5   3   9  396.52   16.72
   6   3  -9  119.87    9.10
  -6   3  -9  117.27   13.02
   6  -3  -9  115.68    6.49
  -6  -3  -9  117.69    7.27
   6   3   9  111.11    9.28
   6  -3   9  102.30    5.09
   6   3  -9  118.52    6.02
  -6   3   9  114.18    7.33
   7   3  -9    4.97    2.81
   7  -3  -9    4.99    2.75
  -7   3  -9    5.29    2.29
  -7  -3  -9    5.82    2.66
   7   3   9    6.21    2.91
   7  -3   9    4.97    1.41
   7   3  -9    4.19    1.33
  -7   3   9    4.33    2.72
   8   3  -9   34.18    6.29
   8  -3  -9   30.21    2.92
  -8   3  -9   31.66    3.12
  -8  -3  -9   30.11    6.04
   8   3   9   30.25    7.08
   8  -3   9   27.56    5.02
   8   3  -9   34.70    3.25
  -8   3   9   29.47    4.07
   9   3  -9   79.60    7.87
   9  -3  -9   71.75    5.56
  -9   3  -9   75.35    6.10
  -9  -3  -9   74.72    7.02
   9   3   9   75.23    7.33
   9  -3   9   67.17    3.85
   9   3  -9   81.55    6.14
  -9   3   9   77.58    7.19
  10   3  -9  267.51   14.40
  10  -3  -9  270.64   11.67
 -10  -3  -9  294.02   14.30
  10  -3   9  268.12   11.85
  10   3  -9  307.21   13.43
 -10   3   9  266.42   13.34
  11   3  -9   35.73    6.58
  11  -3  -9   25.21    2.98
 -11   3  -9   27.95    4.25
 -11  -3  -9   30.63    8.07
  11   3   9   30.95   11.30
  11  -3   9   27.77    8.07
  11   3  -9   24.46    7.16
 -11   3   9   36.16    7.49
  12   3  -9   38.15    6.28
  12  -3  -9   36.53    3.69
 -12   3  -9   40.13    4.77
 -12  -3  -9   37.46    7.60
  12   3   9   29.33   12.83
  12   3  -9   35.21    4.03
 -12   3   9   31.78   10.14
  13   3  -9   13.36    5.25
  13  -3  -9    9.58    2.12
 -13   3  -9    7.56    2.32
 -13  -3  -9    9.08    2.81
  13   3   9   13.16    5.29
  13  -3   9   12.54    3.08
  13   3  -9   10.80    3.29
 -13   3   9   12.14    5.40
 -13  -3   9   10.82    2.67
  14   3  -9  282.07   27.24
 -14   3  -9  290.33   17.75
 -14  -3  -9  306.05   19.85
  14   3   9  298.08   20.40
  14  -3   9  273.10   17.16
  14   3  -9  290.00   17.96
  14  -3  -9  303.94   19.53
 -14   3   9  295.70   22.59
 -14  -3   9  269.42   16.44
  15   3  -9   12.53    5.02
 -15   3  -9    8.42    4.18
 -15  -3  -9   13.17    3.91
  15   3   9   10.44    4.36
  15  -3   9    9.64    3.24
  15   3  -9    9.79    5.13
  15  -3  -9   16.02    4.96
 -15   3   9   13.61    6.04
  16   3  -9    2.89    3.75
 -16   3  -9    1.19    1.69
 -16  -3  -9    0.97    1.89
  16   3   9    2.92    3.32
  16  -3   9    2.40    2.69
  16   3  -9    2.38    2.65
  16  -3  -9    1.98    2.20
 -16   3   9    3.18    3.01
  17   3  -9    3.32    3.32
 -17  -3  -9    0.27    1.82
  17   3   9    3.41    4.25
  17  -3   9    2.84    2.94
  17   3  -9    1.14    2.23
  17  -3  -9    2.17    3.99
 -17   3   9    3.80    3.74
  18   3  -9   89.82   18.10
 -18  -3  -9  110.12   10.65
  18   3   9  111.92   11.17
  18  -3  -9  116.63   11.29
 -18   3   9  103.21   22.14
  19   3  -9    2.83    2.85
 -19  -3  -9    3.68    3.09
  19   3   9   -0.35    2.26
  19  -3   9    1.04    2.39
  19   3  -9    3.35    2.94
  19  -3  -9    2.21    3.57
 -19   3   9    4.79    4.07
  20   3  -9   21.69   15.01
 -20  -3  -9   19.20    5.06
  20   3   9   20.02    4.73
  20  -3   9   11.29    8.92
  20   3  -9   11.98    8.89
  20  -3  -9   15.04   10.94
 -20   3   9   24.48   13.36
   0   3 -10   -0.42    1.71
   0  -3 -10    1.44    2.89
   0   3  10    0.93    1.81
   0   3  10    2.22    2.67
   1   3 -10  218.45   11.15
  -1   3 -10  221.67   11.10
   1  -3 -10  226.02   10.68
  -1  -3 -10  220.08   10.57
  -1   3  10  219.56   11.53
   1   3  10  238.01   12.81
  -1   3  10  227.29   11.50
   1   3  10  223.00   11.12
   2   3 -10   32.74    4.49
  -2   3 -10   30.67    5.90
   2  -3 -10   30.51    3.48
  -2  -3 -10   32.08    3.88
   2   3  10   33.76    6.63
  -2   3  10   33.48    4.21
   2   3  10   34.85    4.10
   3   3 -10  158.12    9.17
  -3   3 -10  171.44   14.57
   3  -3 -10  155.16   10.21
  -3  -3 -10  160.63    8.56
   3   3  10  157.00   11.08
  -3   3  10  159.63    9.06
   3   3  10  152.71    9.26
   4   3 -10   99.24    7.91
   4  -3 -10   95.64    6.07
  -4  -3 -10   89.86    6.65
   4  -3  10   93.75    4.53
   4   3  10   92.79    7.06
   4   3 -10   92.17    4.88
  -4   3  10   90.35    6.69
   5   3 -10  215.24   14.84
  -5   3 -10  202.74   13.87
   5  -3 -10  221.44   12.84
  -5  -3 -10  204.82   12.59
   5  -3  10  194.96   10.46
   5   3  10  203.89   15.87
   5   3 -10  221.45   11.77
  -5   3  10  220.26   15.51
   6   3 -10   73.11    9.80
  -6   3 -10   77.13   10.30
   6  -3 -10   65.13    4.31
  -6  -3 -10   66.61    6.35
   6   3  10   71.38   12.70
   6   3 -10   68.50    4.10
  -6   3  10   73.91    7.14
   7   3 -10  157.32   10.03
   7  -3 -10  159.00    8.67
  -7   3 -10  182.68    9.59
  -7  -3 -10  166.47   13.91
   7   3  10  172.70   10.22
   7  -3  10  151.87    7.00
   7   3 -10  175.36    7.94
  -7   3  10  183.39   12.66
   8   3 -10   25.76    5.25
   8  -3 -10   22.89    3.06
  -8   3 -10   21.38    3.55
  -8  -3 -10   25.17    4.23
   8   3  10   23.68   10.89
   8  -3  10   14.79    5.75
   8   3 -10   22.31    2.73
  -8   3  10   21.26    4.24
   9   3 -10   64.51    7.68
  -9   3 -10   63.24    7.64
  -9  -3 -10   56.50    5.92
   9   3  10   57.46   10.87
   9  -3  10   51.27    4.08
   9   3 -10   61.04    4.57
  -9   3  10   60.99    8.56
  10   3 -10    2.71    3.27
  10  -3 -10    2.38    2.18
 -10   3 -10    2.98    2.44
 -10  -3 -10    0.76    1.90
  10   3  10    3.44    3.02
  10  -3  10    1.02    1.57
  10   3 -10    1.46    1.76
 -10   3  10    2.16    2.66
  11   3 -10   10.80    5.34
  11  -3 -10    3.44    1.90
 -11   3 -10    7.24    3.23
 -11  -3 -10    8.13    3.32
  11   3  10    7.11    3.47
  11  -3  10    5.27    1.81
  11   3 -10    8.23    3.54
 -11   3  10    8.41    3.43
  12   3 -10   63.97   17.24
 -12   3 -10   77.63    6.48
 -12  -3 -10   62.10   11.92
  12   3  10   49.39   11.32
  12  -3  10   58.06    5.03
  12   3 -10   62.41    5.86
 -12   3  10   63.63    8.95
 -12  -3  10   53.52   10.88
  13   3 -10   57.03    8.38
  13  -3 -10   40.40    7.16
 -13   3 -10   56.96    5.84
 -13  -3 -10   51.95    8.84
  13   3  10   38.12   14.64
  13  -3  10   40.99    8.88
  13   3 -10   45.22    7.35
 -13   3  10   41.60   17.66
 -13  -3  10   51.90    5.23
  14   3 -10    1.24    2.49
 -14  -3 -10    1.33    2.38
  14   3  10    1.45    2.01
  14  -3  10    0.46    1.22
  14   3 -10    0.47    1.78
  14  -3 -10    3.48    3.20
 -14   3  10    1.69    3.24
 -14  -3  10    0.36    1.20
  15   3 -10   32.35   19.03
 -15   3 -10   41.39    4.65
 -15  -3 -10   37.23    5.04
  15   3  10   39.56   10.48
  15  -3  10   39.08    4.94
  15   3 -10   29.41    9.68
  15  -3 -10   41.36    8.62
 -15   3  10   47.28   14.14
  16   3 -10   23.81   10.76
 -16   3 -10   11.81    5.49
  16   3  10   24.06    5.76
  16  -3  10   22.37    4.35
  16   3 -10   14.42    6.10
 -16   3  10   28.09    6.78
  17   3 -10   77.62   22.21
 -17  -3 -10   97.26    9.62
  17   3  10   82.20   12.42
  17  -3  10   81.23    7.63
  17  -3 -10  107.47   10.40
 -17   3  10  109.37   21.02
  18   3 -10   13.80    9.68
 -18  -3 -10   20.28    5.09
  18   3  10   19.50    5.60
  18  -3  10   10.83    3.08
  18   3 -10   15.93    4.94
  18  -3 -10   15.31    4.43
 -18   3  10   26.71   10.10
  19   3 -10   27.40   15.96
 -19  -3 -10   34.26    6.22
  19   3  10   36.63    7.51
  19  -3  10   20.02    4.52
  19  -3 -10   36.25   13.75
 -19   3  10   31.66   18.13
   0   3 -11    3.40    3.05
   0  -3 -11    2.28    2.49
   0   3  11    2.96    2.38
   0   3  11    2.56    1.99
   1   3 -11   23.37    4.01
  -1   3 -11   21.14    3.92
   1  -3 -11   22.89    3.61
  -1  -3 -11   23.13    3.39
  -1   3  11   26.24    9.08
   1   3  11   28.70    7.50
  -1   3  11   18.99    3.54
   1   3  11   24.03    3.54
   2   3 -11  291.37   13.83
  -2   3 -11  294.63   13.81
   2  -3 -11  277.09   12.51
  -2  -3 -11  281.32   12.96
   2   3  11  294.42   16.01
  -2   3  11  293.20   13.99
   2   3  11  283.96   13.21
   3   3 -11  364.19   17.01
   3  -3 -11  332.82   14.48
  -3  -3 -11  334.16   15.05
   3   3  11  342.11   16.42
  -3   3  11  343.02   15.69
   3   3  11  348.98   16.11
   4   3 -11  113.40    8.38
  -4   3 -11  121.39    7.99
   4  -3 -11  119.26    9.96
  -4  -3 -11  109.43   12.24
   4   3  11  113.39    8.92
  -4   3  11  112.66    8.19
   5   3 -11    2.55    3.28
  -5   3 -11    1.84    2.50
   5  -3 -11    1.81    2.02
  -5  -3 -11    2.29    2.79
   5   3  11    3.96    3.28
  -5   3  11    2.36    2.98
   6   3 -11  280.10   16.31
  -6   3 -11  290.86   15.93
   6  -3 -11  263.18   13.96
   6   3  11  264.07   15.34
  -6   3  11  307.01   17.63
   7   3 -11  222.57   14.19
   7  -3 -11  218.58   12.79
  -7   3 -11  216.13   18.44
  -7  -3 -11  219.35   13.26
   7   3  11  209.44   13.38
  -7   3  11  230.33   13.73
   8   3 -11    8.88    5.49
   8  -3 -11    2.05    1.55
  -8   3 -11    4.41    2.28
  -8  -3 -11    2.74    1.99
   8   3  11    5.65    3.57
  -8   3  11    6.45    4.16
   9   3 -11   41.31    6.84
  -9   3 -11   36.05    4.00
  -9  -3 -11   35.97    5.19
   9   3  11   36.54    9.03
  -9   3  11   37.69    5.66
  10  -3 -11    1.51    1.95
 -10   3 -11    1.32    1.61
 -10  -3 -11    1.89    2.98
  10   3  11    4.02    3.85
 -10   3  11    2.19    3.78
  11   3 -11   57.52   16.36
  11  -3 -11   52.70    5.27
 -11   3 -11   50.70   11.45
 -11  -3 -11   56.05    6.57
  11   3  11   61.12   18.05
 -11   3  11   52.60    6.65
 -11  -3  11   45.26    8.21
  12   3 -11    4.49    3.91
  12  -3 -11    3.18    1.78
 -12   3 -11    3.62    2.32
 -12  -3 -11    3.68    2.73
  12   3  11    2.94    3.74
 -12   3  11    4.38    2.89
 -12  -3  11    3.61    2.31
  13   3 -11   18.99    9.15
 -13   3 -11   19.11    6.35
 -13  -3 -11   18.79    3.78
  13   3  11   16.82    8.19
 -13   3  11   16.22    8.10
 -13  -3  11   15.49    3.11
  14   3 -11  110.11    9.90
 -14   3 -11  118.23    9.77
 -14  -3 -11  119.38    8.47
  14   3  11   85.60   14.51
  14  -3 -11  112.75   10.66
 -14   3  11  110.17   12.71
 -14  -3  11   86.33    9.06
  15   3 -11   12.09    5.08
 -15   3 -11    8.76    3.38
 -15  -3 -11   13.33    4.08
  15   3  11   11.11    3.98
  15  -3 -11    8.61    3.95
 -15   3  11    8.03    7.29
  16   3 -11   37.64   16.11
 -16   3 -11   33.24    8.11
 -16  -3 -11   39.98   11.73
  16   3  11   30.57   11.55
  16  -3 -11   50.64    7.37
 -16   3  11   48.01   17.19
  17   3 -11   21.56   13.10
 -17  -3 -11   19.80    4.98
  17   3  11   18.27    7.79
  17  -3 -11   24.37   11.50
 -17   3  11   29.26    9.38
 -18  -3 -11    8.51    4.18
  18   3  11    8.48    5.76
  18  -3 -11    4.75    3.74
 -18   3  11   11.84    5.40
   0   3 -12    1.49    2.77
   0  -3 -12    0.41    1.74
   0   3  12    1.83    2.85
   0   3  12    0.86    1.89
   1   3 -12  163.10   10.78
  -1   3 -12  150.12   15.17
   1  -3 -12  153.78   16.51
  -1  -3 -12  157.74    9.72
   1   3  12  142.05   13.69
  -1   3  12  166.19   16.60
   1   3  12  160.62   10.41
   2   3 -12   14.17    3.83
  -2   3 -12   14.26    3.42
   2  -3 -12   14.73    5.45
  -2  -3 -12   10.88    5.60
   2   3  12   14.23    4.57
  -2   3  12   11.53    5.19
   2   3  12   11.90    3.49
   3   3 -12    3.94    2.42
  -3   3 -12    3.37    1.84
   3  -3 -12    3.97    2.18
  -3  -3 -12    2.13    3.23
   3   3  12    4.92    2.52
  -3   3  12    4.98    3.37
   3   3  12    5.37    4.03
   4   3 -12  121.75    9.23
  -4   3 -12  101.05    7.18
   4  -3 -12  106.76    9.67
  -4  -3 -12  102.95   12.68
   4   3  12   99.19   16.13
  -4   3  12  115.76    8.17
   5   3 -12  179.72   10.75
  -5   3 -12  183.31    9.60
  -5  -3 -12  163.69    9.90
   5   3  12  166.20   11.01
  -5   3  12  179.76   16.03
   6   3 -12    5.69    4.22
  -6   3 -12    4.93    3.33
   6  -3 -12    3.65    1.88
  -6  -3 -12    5.07    3.06
   6   3  12   -0.20    2.47
  -6   3  12    6.86    3.64
   7   3 -12    9.05    5.06
   7  -3 -12    4.00    1.93
  -7   3 -12    5.99    2.94
  -7  -3 -12    5.62    3.27
   7   3  12    4.95    4.59
  -7   3  12    5.11    3.24
   8   3 -12   11.42    4.94
   8  -3 -12    5.42    2.12
  -8   3 -12    9.72    3.67
  -8  -3 -12    8.58    3.50
   8   3  12   12.02    5.00
  -8   3  12    7.21    3.36
   9   3 -12    7.89    3.95
   9  -3 -12    6.52    2.62
  -9   3 -12    3.98    2.00
  -9  -3 -12    5.36    2.71
   9   3  12    3.50    2.11
  -9   3  12    3.57    3.43
  10   3 -12    3.66    3.98
  10  -3 -12    2.18    1.63
 -10  -3 -12    2.84    2.71
  10   3  12    5.61    3.78
 -10   3  12    3.60    3.57
  11  -3 -12    5.78    2.26
 -11   3 -12    7.54    3.08
 -11  -3 -12    7.73    3.45
  11   3  12    8.96    4.17
 -11   3  12    7.38    3.26
 -11  -3  12    6.79    3.68
  12   3 -12   23.82   10.80
  12  -3 -12   17.35    3.41
 -12   3 -12   27.98    4.69
 -12  -3 -12   20.01    4.14
  12   3  12   22.82    9.02
 -12   3  12   20.39   12.35
 -12  -3  12   15.72    3.25
  13   3 -12   44.99    8.36
 -13   3 -12   41.10   10.11
 -13  -3 -12   40.99    8.48
  13   3  12   32.37    8.85
 -13   3  12   46.84    7.04
 -13  -3  12   30.12    8.84
  14   3 -12    2.84    3.93
 -14   3 -12    1.43    2.14
 -14  -3 -12    3.32    2.62
  14   3  12   -0.31    1.80
 -14   3  12    5.97    4.78
 -14  -3  12    1.56    1.88
  15   3 -12    2.52    3.47
 -15   3 -12    2.01    2.62
 -15  -3 -12    3.18    3.11
  15   3  12    1.61    2.36
  15  -3 -12    1.40    2.53
 -15   3  12    0.94    2.84
 -16   3 -12    1.95    2.73
 -16  -3 -12    2.04    3.05
  16   3  12    1.06    3.30
  16  -3 -12    4.49    3.11
   0   3 -13  355.05   17.64
   0  -3 -13  365.20   17.31
   0   3  13  363.38   18.62
   0   3  13  392.50   19.20
   1   3 -13   11.47    4.00
  -1   3 -13    6.87    3.23
   1  -3 -13    7.69    3.48
  -1  -3 -13    6.65    3.02
   1   3  13    8.64    4.35
  -1   3  13   11.86    3.50
   1   3  13    9.69    4.94
   2   3 -13   13.37    3.99
  -2   3 -13   12.12    3.69
   2  -3 -13   19.11    5.06
  -2  -3 -13   15.83    6.01
   2   3  13   16.92   11.13
  -2   3  13   15.59    3.90
   2   3  13   17.19    4.64
   3   3 -13  217.93   13.27
  -3   3 -13  183.86   11.66
   3  -3 -13  209.38   11.66
  -3  -3 -13  186.96   10.84
   3   3  13  211.96   17.69
  -3   3  13  207.09   14.42
   4   3 -13  124.57    9.87
  -4   3 -13  126.34    9.38
  -4  -3 -13  124.47    8.72
   4   3  13  133.51   13.24
  -4   3  13  125.13    9.41
   4   3  13  134.09    9.31
   5   3 -13   11.41    4.38
  -5   3 -13    5.32    3.22
   5  -3 -13    9.89    3.00
  -5  -3 -13   10.27    3.63
   5   3  13   10.82    4.83
  -5   3  13   10.63    4.75
   6   3 -13   52.59    7.68
  -6   3 -13   44.92    6.39
   6  -3 -13   46.59    5.51
  -6  -3 -13   39.04   10.94
   6   3  13   41.37   14.17
  -6   3  13   50.83    6.85
   7   3 -13  133.57   14.20
   7  -3 -13  117.81   10.86
  -7   3 -13  108.97   19.87
  -7  -3 -13  112.93   12.59
   7   3  13  105.50   19.03
  -7   3  13  121.69   12.40
   8   3 -13    2.05    3.50
   8  -3 -13    0.73    1.64
  -8   3 -13    1.44    1.85
  -8  -3 -13    1.46    2.82
   8   3  13    0.95    2.98
  -8   3  13    0.42    1.64
   9   3 -13   65.58    8.64
   9  -3 -13   41.25    8.38
  -9   3 -13   43.16   13.94
  -9  -3 -13   49.11    6.12
   9   3  13   48.75   10.75
  -9   3  13   53.96    6.29
  10   3 -13   29.15    6.65
  10  -3 -13   24.99    4.27
 -10   3 -13   25.31    5.22
 -10  -3 -13   27.61    6.14
  10   3  13   25.60    9.50
 -10   3  13   25.14    7.62
  11   3 -13   12.22    4.38
 -11   3 -13    7.19    2.64
 -11  -3 -13    8.48    4.09
  11   3  13    8.98    5.44
 -11   3  13    9.65    7.86
 -11  -3  13    8.98    3.29
  12   3 -13   17.26    5.02
 -12   3 -13   22.65    4.92
 -12  -3 -13   15.90    4.77
  12   3  13   15.44    9.40
 -12   3  13   26.75    5.49
 -12  -3  13   17.90    4.95
  13   3 -13    2.27    3.65
 -13  -3 -13    1.41    2.80
  13   3  13    3.45    4.09
 -13   3  13    3.27    3.95
 -13  -3  13    1.65    2.21
  14   3 -13   13.06    9.20
 -14   3 -13   16.42    4.19
  14   3  13   10.16    6.39
 -14   3  13   12.98    7.95
 -14  -3  13   10.11    3.39
 -15   3 -13    3.35    2.54
 -15  -3 -13    1.83    3.69
  15   3  13    1.21    1.85
  15  -3 -13    2.90    3.48
 -15   3  13    2.44    2.53
   0   3 -14    0.81    1.79
   0  -3 -14    1.97    2.39
   0   3  14    1.38    2.89
   1   3 -14    7.94    3.15
  -1   3 -14    9.12    3.22
   1  -3 -14    6.81    4.20
  -1  -3 -14    7.42    3.06
   1   3  14    5.29    4.32
  -1   3  14    6.00    3.10
   1   3  14    7.20    3.26
   2   3 -14  132.51   18.33
  -2   3 -14  139.78   13.40
   2  -3 -14  155.72   15.10
  -2  -3 -14  135.07   13.01
   2   3  14  134.25   12.76
  -2   3  14  159.74   14.99
   2   3  14  163.63   15.71
   3   3 -14   25.15    6.16
  -3   3 -14   25.51    6.37
   3  -3 -14   25.85    5.10
  -3  -3 -14   26.68    5.97
   3   3  14   23.10    9.30
  -3   3  14   29.75    5.57
   3   3  14   29.31    6.24
   4   3 -14   77.47    9.31
  -4   3 -14   77.25    9.26
   4  -3 -14   76.63    8.32
  -4  -3 -14   70.01    7.86
   4   3  14   78.89   18.73
  -4   3  14   77.46    8.73
   4   3  14   79.82    9.60
   5   3 -14    1.96    3.21
  -5   3 -14    2.75    3.15
   5  -3 -14    1.40    1.08
  -5  -3 -14    4.17    2.77
   5   3  14    3.21    3.88
  -5   3  14    2.32    3.05
   6   3 -14  127.89   23.69
  -6   3 -14  122.34    9.49
   6  -3 -14  125.52    9.54
  -6  -3 -14  130.29    8.89
   6   3  14  124.58   12.89
  -6   3  14  158.15   11.16
   7   3 -14   15.62    5.01
   7  -3 -14    8.91    5.07
  -7   3 -14   10.46    3.55
  -7  -3 -14   10.42    3.43
   7   3  14    6.80    3.59
  -7   3  14   17.91    5.12
   8   3 -14    3.48    3.85
   8  -3 -14    5.43    2.46
  -8   3 -14    2.26    2.30
  -8  -3 -14    5.01    3.63
   8   3  14    5.02    2.73
  -8   3  14    5.27    3.41
   9   3 -14    3.70    4.19
   9  -3 -14    1.68    2.35
  -9  -3 -14    1.47    1.90
   9   3  14    1.28    1.74
  -9   3  14    4.44    3.86
  10   3 -14   75.87    9.28
  10  -3 -14   61.49    6.31
 -10   3 -14   54.29   14.33
 -10  -3 -14   62.05   12.38
  10   3  14   50.91   14.62
 -10   3  14   72.57    8.83
  11   3 -14    4.28    3.13
  11  -3 -14    0.34    1.52
 -11   3 -14    1.75    2.41
 -11  -3 -14    3.67    3.06
  11   3  14    4.42    4.50
 -11  -3  14    1.74    2.12
  12   3 -14    5.30    4.50
 -12   3 -14    5.79    3.70
 -12  -3 -14    4.40    3.60
  12   3  14    2.13    2.84
 -12   3  14    3.98    4.24
 -12  -3  14    2.16    2.24
  13   3 -14    8.09    8.95
 -13   3 -14    9.76    3.61
 -13  -3 -14    7.90    3.66
  13   3  14    6.73    3.93
 -13   3  14   13.18    4.44
 -13  -3  14    5.61    2.66
   0  -3 -15  246.14   12.08
   1   3 -15    2.35    3.11
  -1   3 -15    2.52    3.16
   1  -3 -15    1.90    2.26
  -1  -3 -15    0.46    2.03
  -1   3  15    2.81    3.50
   1   3  15    0.96    2.39
   2   3 -15    1.21    2.16
  -2   3 -15    3.65    3.68
   2  -3 -15    0.91    2.06
  -2  -3 -15    1.35    1.62
   2   3  15    1.83    2.07
  -2   3  15   -0.07    2.22
   2   3  15    0.42    1.30
   3   3 -15   54.38    6.80
  -3   3 -15   55.30    7.49
   3  -3 -15   57.66    5.92
  -3  -3 -15   49.55    7.88
   3   3  15   48.46   12.94
   3   3  15   61.15    6.91
   4   3 -15   41.94    6.65
  -4   3 -15   31.71    5.31
   4  -3 -15   30.83    4.80
  -4  -3 -15   36.93    5.14
   4   3  15   33.19    7.15
  -4   3  15   37.29   16.59
   4   3  15   43.56    6.92
   5   3 -15    1.67    2.28
  -5   3 -15    1.66    3.00
  -5  -3 -15    2.53    2.66
   5   3  15    2.33    3.39
  -5   3  15    0.64    1.92
   5   3  15    4.71    3.95
   6   3 -15   33.44    6.96
  -6   3 -15   35.82    5.77
   6  -3 -15   46.09    5.99
  -6  -3 -15   47.88    6.38
   6   3  15   45.30   18.33
  -6   3  15   42.42    6.45
   7   3 -15   18.27    4.63
   7  -3 -15   16.29    3.64
  -7   3 -15   20.96    4.78
  -7  -3 -15   20.28    3.75
   7   3  15   19.86    9.16
  -7   3  15   26.76    6.12
   8   3 -15   48.14   15.95
   8  -3 -15   35.97   11.40
  -8   3 -15   44.60    7.16
  -8  -3 -15   42.82    6.57
   8   3  15   36.43   19.48
  -8   3  15   57.76    7.96
   9   3 -15   63.14    9.97
   9  -3 -15   58.54    8.68
  -9   3 -15   51.02   13.41
  -9  -3 -15   53.27    8.17
   9   3  15   43.73   23.18
  -9   3  15   70.50   10.42
  10   3 -15   23.49    7.13
 -10   3 -15   19.86    6.95
 -10  -3 -15   18.45    5.26
  10   3  15   16.01   10.06
 -10   3  15   25.86    6.61
 -10  -3  15   16.24    4.26
   0   3 -16    1.08    3.28
   0   3  16    0.76    2.27
   1   3 -16   17.22    4.49
  -1   3 -16   21.70    5.75
   1  -3 -16   23.36    5.38
  -1  -3 -16   19.82    8.44
  -1   3  16   19.42    4.76
   1   3  16   27.18    6.29
   2   3 -16   21.13    5.96
  -2   3 -16   15.03    4.24
   2  -3 -16   14.11    3.55
  -2  -3 -16   17.28    4.73
  -2   3  16   24.80    6.37
   2   3  16   16.60    9.88
   3   3 -16   10.64    5.03
  -3   3 -16    8.64    3.44
   3  -3 -16   10.08    3.47
  -3  -3 -16    9.21    3.27
   3   3  16    5.95    6.75
  -3   3  16    9.82    4.55
   3   3  16   14.77    6.93
   4   3 -16   21.06    5.90
  -4   3 -16   14.44    7.30
   4  -3 -16   19.88    7.93
  -4  -3 -16   27.61    5.48
   4   3  16   17.96   11.97
  -4   3  16   28.55    6.67
   4   3  16   23.82    6.20
   5   3 -16    5.49    4.33
  -5   3 -16    7.64    4.11
   5  -3 -16    6.87    3.92
  -5  -3 -16    5.59    3.83
   5   3  16    4.15    4.54
   5   3  16    5.34    4.12
   6   3 -16   67.36   12.58
  -6   3 -16   61.17    9.05
   6  -3 -16   57.49    7.87
  -6  -3 -16   56.19    7.95
   6   3  16   60.11   15.72
  -6   3  16   73.91   10.65
   6   3  16   64.34    9.01
   7   3 -16   17.48    5.17
   7  -3 -16   26.02    5.47
  -7   3 -16   25.55    6.91
  -7  -3 -16   23.96    4.95
   7   3  16   16.80   11.07
   0   4   0 8434.20   93.50
   0   4   0 8318.33   94.14
  -1   4   0    0.39    1.27
   1   4   0   -4.49    1.98
   1   4   0    1.15    1.35
   1   4   0    0.19    1.38
  -1   4   0    1.42    1.86
  -2   4   0    6.27    2.24
   2   4   0    5.74    2.36
   2   4   0    6.14    2.27
   2   4   0    5.61    2.33
  -2   4   0    5.68    2.17
  -3   4   0    0.55    0.87
   3   4   0   -0.32    1.52
   3   4   0    0.25    0.80
  -3   4   0    0.34    1.02
  -4   4   0  454.47   14.25
   4   4   0  415.38   14.72
   4   4   0  413.28   14.18
  -4   4   0  482.08   16.53
   5   4   0   -0.75    1.45
   5   4   0    1.45    1.62
  -5   4   0    0.06    1.32
   6   4   0  178.30   10.02
   6   4   0  184.15    7.72
  -6   4   0  207.19   10.63
  -6  -4   0  157.78    5.00
   7   4   0    0.31    1.52
   7   4   0    0.25    1.47
  -7   4   0    0.98    2.06
   8   4   0   58.73    7.80
   8   4   0   59.43    4.18
   8  -4   0   61.03    3.41
  -8   4   0   65.86    5.23
   9   4   0    2.00    2.27
   9   4   0    1.75    2.15
   9  -4   0    0.65    1.43
  -9   4   0   -0.07    2.02
  10   4   0    0.94    2.18
  10   4   0    1.43    2.55
  10  -4   0    4.66    2.82
 -10   4   0    1.64    3.22
  11   4   0    2.79    2.93
  11   4   0    1.45    2.80
  11  -4   0    0.18    1.41
 -11   4   0    1.27    2.87
  12   4   0  166.06   13.36
  12   4   0  191.79   10.81
  12  -4   0  191.91    9.46
 -12   4   0  221.80   13.29
  13   4   0    0.89    3.15
  13   4   0    3.55    3.77
  13  -4   0    0.97    1.68
 -13   4   0    0.60    1.41
  14   4   0    5.65    2.69
  14   4   0    2.82    2.40
  14  -4   0    5.15    2.22
 -14   4   0    5.06    3.99
  15   4   0   -0.39    1.97
  15   4   0    1.86    3.12
  15  -4   0    1.35    2.12
 -15   4   0   -0.37    1.78
  16   4   0    7.60    4.28
  16   4   0    8.79    3.94
  16  -4   0    5.43    2.62
 -16   4   0    4.85    3.27
  17   4   0    0.90    2.89
  17   4   0    0.96    2.61
  17  -4   0    1.42    2.78
  18   4   0  356.12   23.24
  18   4   0  346.03   23.63
  18  -4   0  402.09   24.63
  19   4   0    0.37    2.83
  19   4   0    2.12    4.03
  19  -4   0    2.46    2.51
  20   4   0    0.30    2.53
  20   4   0    3.20    3.77
  20  -4   0    3.03    3.58
  21   4   0    4.65    4.38
  21  -4   0    2.52    2.82
  22   4   0   10.23    3.83
  22  -4   0   20.07    5.11
   0   4   1    1.80    2.08
   0   4  -1    0.28    1.71
   0   4  -1    0.26    0.76
   0   4   1    0.95    1.63
   0   4   1    2.37    2.49
  -1   4   1  511.96   11.28
   1   4   1  492.63   13.09
   1   4  -1  448.08   11.59
  -1   4  -1  447.20   10.55
  -1   4   1  455.25   10.64
   1   4  -1  455.63    9.73
   1   4   1  441.75   10.90
   1   4   1  425.75   11.94
  -1   4   1  423.13   10.86
   2   4  -1  341.07   12.40
  -2   4  -1  335.66   11.39
   2   4   1  402.61   15.88
   2   4  -1  332.30   10.70
   2   4   1  427.78   13.73
  -2   4   1  344.19   13.47
   3   4   1    3.26    1.44
   3   4  -1    4.09    1.88
  -3   4  -1    1.41    0.70
   3  -4  -1    3.12    0.90
   3   4   1    3.03    1.29
   3   4  -1    3.79    1.25
  -3   4  -1    3.65    1.40
   3   4   1    2.97    1.19
  -3   4   1    3.65    1.87
   4   4   1  132.34   11.28
   4   4  -1  133.17    7.97
  -4   4  -1  123.23    5.33
   4  -4  -1  129.59    5.45
   4   4   1  126.40    6.36
   4   4  -1  125.93    7.04
  -4   4  -1  130.55    8.08
   4   4   1  122.92    5.43
  -4   4   1  112.07    9.53
   5   4   1   89.61    8.72
   5   4  -1   84.88    5.86
  -5   4  -1   81.52    3.95
   5  -4  -1   83.97    3.11
   5   4   1   92.25    7.66
   5   4  -1   88.72    4.53
  -5   4  -1   96.80   11.41
   5   4   1   92.55    3.95
  -5   4   1   95.27    9.32
   6   4   1   86.68   10.83
  -6   4  -1   81.60    3.98
   6   4  -1   81.87    7.87
   6   4   1   78.62    4.77
   6   4  -1   85.29    4.68
   6  -4   1   87.80    4.50
  -6   4  -1   87.79   11.23
  -6   4   1   89.19    7.38
  -6  -4   1   66.55    2.69
   7   4   1  221.08   12.27
   7   4  -1  222.09   12.63
   7   4   1  224.21    8.24
   7   4  -1  218.00    7.69
   7  -4   1  236.64    7.87
  -7   4  -1  218.96    9.07
  -7   4   1  236.26   17.20
  -7  -4   1  191.34    4.79
   8   4   1   55.04    9.02
   8   4  -1   49.93   11.36
   8   4   1   50.25    4.14
   8   4  -1   46.99    3.40
   8  -4   1   55.84    3.53
  -8   4  -1   55.49    6.48
  -8   4   1   55.68    6.32
   9   4   1    0.48    1.75
   9   4  -1    3.85    3.84
   9   4   1    2.09    2.28
   9   4  -1    2.80    2.68
   9  -4   1    2.79    1.98
   9  -4  -1    2.17    1.48
  -9   4  -1    0.67    1.65
  -9   4   1    1.61    1.53
  10   4   1  132.91    9.43
  10   4  -1  150.33   17.42
  10   4   1  144.62    8.89
  10   4  -1  134.17    7.83
  10  -4   1  148.30    8.06
  10  -4  -1  152.61   10.88
 -10   4  -1  138.30   10.37
 -10   4   1  147.55   17.48
  11   4   1  165.49   17.82
  11   4  -1  151.99   11.89
  11   4   1  167.88    8.07
  11   4  -1  165.81    8.86
  11  -4   1  182.38    8.15
  11  -4  -1  177.65    7.23
 -11   4  -1  170.60    9.73
 -11   4   1  170.47    8.45
  12   4   1    3.42    3.07
  12   4  -1    6.47    4.14
  12   4   1    5.83    2.46
  12   4  -1    7.74    4.31
  12  -4   1    6.45    2.27
  12  -4  -1    7.12    2.66
 -12   4   1    9.64    4.44
  13   4   1    2.45    2.25
  13   4  -1    2.35    3.40
  13   4   1    2.76    2.44
  13   4  -1    0.72    2.15
  13  -4   1    2.99    2.22
  13  -4  -1    4.01    3.34
 -13   4   1    2.31    2.73
  14   4   1   60.02    9.65
  14   4  -1   53.72   13.16
  14   4   1   51.66    5.09
  14   4  -1   56.57    6.35
  14  -4   1   56.68    8.01
  14  -4  -1   59.00   12.10
 -14   4   1   56.85   13.43
  15   4   1    0.72    2.49
  15   4  -1    2.14    3.21
  15   4   1    3.25    2.85
  15   4  -1    3.55    3.15
  15  -4   1    2.00    2.70
  15  -4  -1    5.63    2.97
  16   4   1   11.61    6.24
  16   4  -1   12.21    4.30
  16   4   1   10.18    3.89
  16   4  -1    6.41    2.96
  16  -4   1   10.13    3.14
  16  -4  -1    8.00    2.76
 -16   4   1   11.00    6.26
  17   4   1   59.83   11.20
  17   4  -1   59.90   16.17
  17   4   1   64.55   10.53
  17   4  -1   54.71    7.52
  17  -4   1   55.51    5.80
  17  -4  -1   64.72    7.77
 -17   4   1   67.99    9.56
  18   4  -1    1.28    2.60
  18   4   1    1.98    3.93
  18   4  -1    2.68    2.66
  18  -4   1    3.17    4.24
  18  -4  -1    0.70    2.31
 -18   4   1    1.92    2.49
  19   4  -1    2.29    3.71
  19   4   1    2.57    4.32
  19   4  -1    5.21    3.61
  19  -4   1    4.37    3.43
  19  -4  -1    4.47    3.22
 -19   4   1    1.75    2.70
  20   4  -1  114.10   15.30
  20   4   1   99.15   17.31
  20   4  -1  112.16    9.45
  20  -4   1  131.77    9.96
  20  -4  -1  128.48    9.02
  21   4  -1    7.94    3.55
 -21  -4  -1   14.16    6.19
  21   4   1   11.41    4.67
  21   4  -1    7.87    4.11
  21  -4   1   10.28    4.10
  21  -4  -1    9.80    3.34
  22   4  -1   53.38   16.79
 -22  -4  -1   62.83    9.85
  22   4   1   44.31   15.19
  22   4  -1   64.65   11.20
  22  -4   1   48.65   13.59
  22  -4  -1   70.32   10.49
   0   4  -2  396.86   14.66
   0  -4  -2  399.78   13.03
   0   4   2  411.54   14.56
   0   4   2  386.45   14.44
   1   4  -2    9.66    5.59
  -1   4  -2    7.78    3.02
   1  -4  -2    6.80    1.25
  -1  -4  -2    6.74    1.97
  -1   4   2    9.74    3.32
   1   4  -2   10.31    2.85
   1   4   2   10.31    3.16
  -1   4   2    7.84    3.10
   1   4   2    9.42    3.73
   2   4  -2  140.71   11.60
  -2   4  -2  148.66    7.26
   2  -4  -2  156.88    5.86
   2   4  -2  130.82    5.20
   2   4   2  133.73    6.48
  -2   4   2  131.10    6.63
   2   4   2  138.82    7.20
   3   4  -2  180.32    7.97
  -3   4  -2  178.11    8.07
   3  -4  -2  181.54    6.20
   3   4   2  177.48    8.10
   3   4  -2  173.94    6.21
  -3   4   2  170.54    8.88
   3   4   2  173.50    7.67
   4   4   2   82.68    5.42
   4   4  -2   69.42    6.18
  -4   4  -2   74.54    3.71
   4  -4  -2   70.87    2.96
   4   4   2   79.53    7.66
   4   4  -2   76.86    4.01
  -4   4   2   80.13    5.90
   4   4   2   73.55    3.11
   5   4   2   37.25    4.49
   5   4  -2   32.44    5.51
   5  -4  -2   27.38    1.38
  -5   4  -2   29.47    1.97
   5  -4  -2   31.46    2.13
   5   4   2   31.44    6.76
   5   4  -2   31.30    2.39
   5  -4   2   37.35    2.97
   5   4   2   32.55    5.72
  -5   4   2   33.59    7.31
   6   4   2    9.59    3.26
   6   4  -2    6.31    3.18
  -6   4  -2    7.52    2.93
   6  -4  -2    6.71    0.51
   6   4   2    6.50    2.52
   6   4  -2    7.30    1.60
   6  -4   2    8.09    1.63
   6   4   2    6.52    1.58
  -6   4   2    8.20    3.23
   7   4   2 1193.00   16.46
   7   4  -2 1163.15   30.24
   7   4   2 1128.03   28.54
   7   4  -2 1190.62   12.80
  -7   4   2 1257.05   16.33
   8   4   2    8.11    3.58
   8   4  -2    6.98    2.39
  -8   4  -2    5.30    1.59
   8  -4   2    3.54    0.61
   8   4   2    8.95    3.60
   8   4  -2    6.09    1.88
   8  -4   2    5.27    3.06
  -8   4   2    6.59    3.33
  -8  -4   2    3.53    0.95
   9   4   2  106.88   10.62
   9   4  -2  107.24   17.12
   9   4   2  106.85    6.94
   9   4  -2  111.10    6.42
   9  -4   2  111.81    5.96
  -9   4   2  111.32   11.30
  10   4   2  222.32   20.40
  10   4  -2  207.85   13.85
  10   4   2  178.82    8.25
  10   4  -2  210.77    8.19
  10  -4   2  224.73    8.76
  10  -4  -2  213.19    8.05
 -10   4   2  210.11    9.55
  11   4   2  117.26   17.17
  11   4  -2  119.52   19.65
  11   4   2  109.81    7.10
  11   4  -2  113.00    6.91
  11  -4   2  125.58    6.23
  11  -4  -2  122.19    7.74
 -11   4   2  117.54    9.98
  12   4   2    9.60    4.45
  12   4  -2    6.51    4.70
  12   4   2    3.97    2.29
  12   4  -2    5.11    2.45
  12  -4   2    5.14    1.81
  12  -4  -2    5.40    2.70
 -12   4   2    7.01    3.38
  13   4  -2   45.74   12.40
  13   4   2   41.97    6.97
  13   4  -2   40.98    4.93
  13  -4   2   45.26    8.69
  13  -4  -2   48.25    5.04
 -13   4   2   38.28   11.14
  14   4  -2    9.66    5.43
  14   4   2   10.77    3.23
  14   4  -2   13.80    3.64
  14  -4   2   12.49    3.22
  14  -4  -2   11.52    3.54
 -14   4   2   11.63    4.68
  15   4  -2    2.12    2.25
  15   4   2    5.22    2.22
  15   4  -2    4.33    2.82
  15  -4   2    2.95    2.41
  15  -4  -2    1.16    1.66
 -15   4   2    3.40    3.65
  16   4  -2   19.19    8.60
 -16  -4  -2   15.55    6.03
  16   4   2   15.78    4.34
  16   4  -2    9.43    2.90
  16  -4   2   13.59    3.31
  16  -4  -2   13.20    6.69
 -16   4   2   16.53    6.09
  17   4  -2   67.36   19.23
 -17  -4  -2   70.35    7.39
  17   4   2   66.44    7.78
  17   4  -2   54.83    8.82
  17  -4  -2   64.94    6.57
 -17   4   2   64.45    9.98
  18   4  -2   19.97    7.86
 -18  -4  -2   16.43    4.26
  18   4   2   17.48    4.74
  18   4  -2   19.29    7.06
  18  -4   2   24.21    4.21
  18  -4  -2   17.00    9.55
 -18   4   2   23.57   10.68
  19   4  -2    8.20    4.14
 -19  -4  -2    9.23    3.87
  19   4   2    6.47    3.86
  19   4  -2    8.43    4.16
  19  -4   2    6.83    3.18
  19  -4  -2    9.01    4.21
 -19   4   2    6.38    3.12
  20   4  -2   46.51   15.95
 -20  -4  -2   50.27    7.32
  20   4   2   33.34    6.94
  20   4  -2   55.77    7.45
  20  -4   2   39.36    8.63
  20  -4  -2   52.76    6.68
 -20   4   2   46.34   14.69
  21   4  -2   68.16   19.63
 -21  -4  -2   84.25    9.39
  21   4   2   61.33    8.20
  21  -4  -2   86.31    8.83
  22   4  -2   23.29   14.57
 -22  -4  -2   34.53    7.25
  22   4   2   26.28   15.76
  22   4  -2   32.78    8.50
  22  -4   2   41.29    7.43
  22  -4  -2   31.99   11.02
 -22   4   2   18.09   18.98
   0   4  -3    0.59    1.70
   0  -4  -3    1.11    1.99
   0   4   3    0.45    0.99
   0  -4   3    0.94    0.65
   0   4   3    0.73    1.30
   1   4  -3  202.32    8.46
  -1   4  -3  210.56    8.15
   1  -4  -3  208.60    7.85
  -1  -4  -3  219.84    8.31
  -1   4   3  194.48    7.89
   1   4   3  207.38    8.60
   1  -4   3  171.73    5.50
  -1  -4   3  188.38    6.23
  -1   4   3  204.03   10.66
   1   4   3  206.19    9.15
   2   4  -3  118.02   10.28
  -2   4  -3  112.56    5.38
   2  -4  -3  112.49    4.69
  -2  -4  -3  113.51    5.59
   2   4  -3  103.89    4.00
   2   4   3   99.25    5.55
  -2   4   3  106.65    6.69
   2   4   3  105.24    5.56
   3   4  -3   11.96    3.46
  -3   4  -3   10.83    3.00
   3  -4  -3   13.57    1.56
  -3  -4  -3   11.44    2.36
   3   4   3    9.28    2.89
   3   4  -3   10.79    2.12
   3  -4   3   11.37    1.64
  -3   4   3   13.74    4.87
   3   4   3   15.07    4.96
   4   4  -3  447.21   16.58
  -4   4  -3  438.82   13.94
   4  -4  -3  425.63   13.11
  -4  -4  -3  433.83   15.00
   4   4   3  445.25   15.56
   4  -4   3  428.19   12.91
  -4   4   3  447.73   16.22
   4   4   3  430.09   15.19
   5   4  -3    0.38    1.14
   5  -4  -3    2.25    0.80
  -5  -4  -3    1.16    2.27
   5   4   3    2.70    2.08
   5   4  -3    1.12    0.80
   5  -4   3    2.53    1.16
  -5   4   3    1.02    2.27
   5   4   3    2.22    1.00
   6   4  -3    2.39    2.25
   6  -4  -3    0.79    0.58
  -6  -4  -3    2.07    2.90
   6   4   3   -0.05    1.74
   6   4  -3    1.91    1.58
   6  -4   3    1.05    1.22
  -6   4   3    1.87    2.11
   6   4   3    0.09    0.52
   7   4  -3   64.96   10.98
  -7   4  -3   66.13    3.23
   7  -4  -3   58.14    1.49
  -7  -4  -3   62.95    4.93
   7   4   3   59.66    7.29
   7   4  -3   62.21    3.45
  -7   4   3   76.80    6.25
   7   4   3   59.68    4.56
   8   4  -3  171.83   18.17
  -8   4  -3  195.65    8.20
  -8  -4  -3  160.16    8.97
   8   4   3  173.37    9.84
   8   4  -3  182.92    8.69
   8  -4   3  193.97    9.03
  -8   4   3  199.35   18.40
   8   4   3  174.16    7.12
   9   4  -3  346.91   19.48
  -9  -4  -3  335.53   15.53
   9   4   3  321.10   15.16
   9   4  -3  371.74   15.81
   9  -4   3  380.20   16.10
  -9   4   3  386.62   18.32
  10   4  -3  158.46   20.95
 -10  -4  -3  153.10    8.03
  10   4   3  161.97    8.47
  10   4  -3  170.19    7.31
  10  -4   3  181.62    6.92
 -10   4   3  178.21    9.58
  11   4  -3   13.62    5.45
 -11  -4  -3   13.87    4.05
  11   4   3   12.69    2.69
  11   4  -3   13.44    3.30
  11  -4   3   15.64    3.24
  11  -4  -3   13.59    3.71
 -11   4   3   16.35    7.12
  12   4  -3  148.20   15.05
 -12  -4  -3  131.81    9.51
  12   4   3  142.08    8.97
  12   4  -3  155.33    8.85
  12  -4   3  162.38    8.36
  12  -4  -3  155.64   11.23
 -12   4   3  148.58   10.62
  13   4  -3   88.41   15.24
 -13  -4  -3  104.68    9.06
  13   4   3   83.46    6.87
  13   4  -3   95.03    8.07
  13  -4   3  101.62    7.34
  13  -4  -3   94.35    9.11
 -13   4   3   95.94   10.66
  14   4  -3   74.54   19.08
 -14  -4  -3   74.14    7.07
  14   4   3   71.59    6.97
  14   4  -3   61.03   16.45
  14  -4   3   71.87    5.89
  14  -4  -3   73.22   14.52
 -14   4   3   69.94   13.43
  15   4  -3   27.87   10.16
 -15  -4  -3   23.34    4.44
  15   4   3   31.03    5.00
  15   4  -3   24.47    4.77
  15  -4   3   27.93    4.36
  15  -4  -3   28.52    4.95
 -15   4   3   27.15    8.14
  16   4  -3   30.24   10.68
 -16  -4  -3   29.99    4.71
  16   4   3   33.20    5.61
  16   4  -3   24.82    4.87
  16  -4   3   34.04    4.56
  16  -4  -3   32.47   14.78
 -16   4   3   35.39   10.46
  17   4  -3   27.51   10.37
 -17  -4  -3   28.08    5.56
  17   4   3   26.27    5.37
  17   4  -3   22.50    4.39
  17  -4   3   27.12    7.05
  17  -4  -3   30.48    8.96
 -17   4   3   31.50   11.53
  18   4  -3   64.41   13.18
 -18  -4  -3   80.91    9.30
  18   4   3   75.18    9.76
  18   4  -3   74.05    9.39
  18  -4   3   76.38    8.36
  18  -4  -3   73.85    8.37
 -18   4   3   67.38   12.88
  19   4  -3   43.20   16.17
 -19  -4  -3   46.15    6.51
  19   4   3   40.25    7.09
  19   4  -3   43.38    6.67
  19  -4   3   44.12    5.72
  19  -4  -3   42.02   14.74
 -19   4   3   40.75    9.85
  20   4  -3    2.11    3.97
 -20  -4  -3    7.22    5.05
  20   4   3    7.84    4.88
  20  -4   3    9.66    3.01
  20  -4  -3    6.79    3.12
 -20   4   3    8.46    5.08
  21   4  -3    0.25    2.01
 -21  -4  -3    2.90    3.33
  21   4   3    6.27    6.71
  21   4  -3    2.47    3.29
  21  -4   3    2.77    3.24
  21  -4  -3   -0.05    2.54
 -21   4   3    1.30    3.58
  22   4  -3   98.01   16.48
 -22  -4  -3  123.28   14.74
  22   4  -3  114.54   14.37
  22  -4   3   86.43    9.99
  22  -4  -3  110.52   13.60
 -22   4   3  106.20   13.25
   0   4  -4   71.53    4.97
   0  -4  -4   79.56    4.38
   0   4   4   73.49    8.16
   0   4   4   77.02    8.65
   1   4  -4  227.48    9.43
  -1   4  -4  224.26    8.83
   1  -4  -4  223.75    8.56
  -1  -4  -4  214.50    7.93
  -1   4   4  212.75   11.87
   1   4   4  214.06    9.81
   1  -4   4  214.85    6.15
  -1  -4   4  203.78    5.84
  -1   4   4  222.06    9.15
   1   4   4  219.31    9.95
   2   4  -4 1007.77   30.85
  -2   4  -4  996.26   29.95
   2  -4  -4 1026.31   29.95
  -2  -4  -4 1040.31   31.03
   2   4  -4  900.56   25.40
   2   4   4  953.22   29.59
  -2   4   4 1031.06   32.03
   2   4   4  963.61   29.82
   3   4  -4  774.35   24.54
   3  -4  -4  778.86   23.24
  -3  -4  -4  782.99   24.33
   3  -4   4  663.20   19.12
   3   4   4  719.96   23.50
   3   4  -4  691.81   19.90
  -3   4   4  818.42   27.25
   3   4   4  767.16   23.58
   4   4  -4   37.34    5.22
  -4   4  -4   39.29    4.52
   4  -4  -4   36.25    1.96
  -4  -4  -4   46.05    9.95
   4   4   4   38.92   10.80
   4   4  -4   37.50    1.81
   4  -4   4   33.90    1.86
  -4   4   4   35.99    5.66
   4   4   4   35.51    3.04
   5   4  -4  264.37   10.82
   5  -4  -4  259.38    7.16
  -5  -4  -4  274.75   10.06
   5   4   4  262.58   11.33
   5   4  -4  260.97    7.45
   5  -4   4  248.38    7.17
  -5   4   4  314.81   11.33
   5   4   4  261.67    8.10
   6   4  -4   29.16    8.96
  -6   4  -4   28.43    2.73
   6  -4  -4   26.24    1.50
  -6  -4  -4   27.18    3.48
   6   4   4   28.87   10.74
   6   4  -4   26.90    2.00
   6  -4   4   30.36    2.22
  -6   4   4   32.25    5.62
   6   4   4   30.62    6.06
   7   4  -4  101.33   13.13
  -7   4  -4  111.36    5.56
   7  -4  -4   90.81    3.89
  -7  -4  -4  105.45    6.82
   7   4   4   95.35    7.37
   7   4  -4   99.81    5.34
   7  -4   4  102.49    5.36
  -7   4   4  103.80   15.40
   7   4   4   92.91    5.17
   8   4  -4    8.62    3.50
  -8   4  -4    4.71    1.22
  -8  -4  -4    4.06    2.80
   8   4   4    4.94    2.62
   8   4  -4    3.95    1.70
   8  -4   4    2.90    1.66
  -8   4   4    6.83    2.49
   8   4   4    5.05    1.20
   9   4  -4   75.25   10.50
  -9   4  -4   85.99    3.95
  -9  -4  -4   77.38    9.98
   9   4   4   81.57    6.17
   9   4  -4   82.69    5.04
   9  -4   4   89.60    4.74
  -9   4   4   75.84   12.39
   9   4   4   68.90    4.41
  10   4  -4   65.94    9.67
 -10  -4  -4   79.60   14.69
  10   4   4   69.28    6.05
  10   4  -4   78.95    5.36
  10  -4   4   80.16    4.68
 -10   4   4   72.18   13.57
  10   4   4   63.66    4.18
 -10  -4   4   73.50    2.82
  11   4  -4    6.40    3.75
 -11   4  -4    9.26    1.50
 -11  -4  -4   10.83    3.78
  11   4   4    5.82    2.19
  11   4  -4    6.57    1.93
  11  -4   4   10.30    2.66
 -11   4   4   11.38    4.89
 -11  -4   4    4.82    2.15
  12   4  -4   55.17   15.05
 -12   4  -4   46.31    2.41
 -12  -4  -4   40.06    6.79
  12   4   4   45.20    5.14
  12   4  -4   56.42    8.96
  12  -4   4   46.44    3.67
  12  -4  -4   48.51    7.84
 -12   4   4   50.38   12.56
  13   4  -4   25.14    7.61
 -13  -4  -4   22.37    9.59
  13   4   4   23.51    4.53
  13   4  -4   22.27    3.72
  13  -4   4   21.62    9.21
  13  -4  -4   25.50    7.36
 -13   4   4   21.89    6.53
  14   4  -4  350.54   26.62
 -14  -4  -4  360.89   19.99
  14   4   4  329.73   18.62
  14  -4   4  390.78   19.97
  14  -4  -4  390.83   20.82
 -14   4   4  318.08   19.46
  15   4  -4  286.95   16.35
 -15  -4  -4  324.36   15.29
  15   4   4  262.69   13.21
  15   4  -4  275.83   13.59
  15  -4   4  297.45   14.71
  15  -4  -4  360.68   16.75
 -15   4   4  267.78   21.00
  16   4  -4  106.18   16.97
 -16  -4  -4  107.96   12.45
  16   4   4   95.67    9.23
  16   4  -4   92.79    8.25
  16  -4   4  114.23   10.92
  16  -4  -4  128.90   10.00
 -16   4   4  102.64   16.18
  17   4  -4   39.77   11.21
 -17  -4  -4   34.20    5.34
  17   4   4   34.41    5.46
  17   4  -4   28.53    5.33
  17  -4   4   41.33    5.50
  17  -4  -4   32.13   15.85
 -17   4   4   38.16   11.04
  18   4  -4   72.23   21.09
 -18  -4  -4   57.18    7.12
  18   4   4   70.47    9.54
  18   4  -4   59.22    7.79
  18  -4   4   71.92    7.88
  18  -4  -4   70.99   17.98
 -18   4   4   65.20   12.38
  19   4  -4    3.93    3.27
 -19  -4  -4    5.92    3.86
  19   4   4    3.74    3.21
  19   4  -4    4.81    4.21
  19  -4   4    5.60    3.89
  19  -4  -4    6.18    4.32
  20   4  -4   70.39   16.29
 -20  -4  -4   60.64   14.43
  20   4   4   61.67    8.74
  20   4  -4   70.96    9.72
  20  -4   4   70.68   10.35
  20  -4  -4   84.36    9.26
 -20   4   4   74.73   18.01
  21   4  -4  103.58   24.01
 -21  -4  -4  117.39   15.26
  21   4   4  119.99   16.65
  21   4  -4  128.95   16.39
  21  -4   4  112.30   13.50
  21  -4  -4  115.22   14.45
 -21   4   4  123.67   22.38
  22   4  -4    4.67    3.46
 -22  -4  -4    2.75    3.84
  22   4   4    2.57    3.22
  22   4  -4    3.55    3.42
  22  -4   4    2.73    2.54
  22  -4  -4    2.35    2.78
 -22   4   4    0.44    1.73
   0   4  -5    2.32    2.41
   0  -4  -5    1.09    1.60
   0   4   5    0.80    0.68
   0   4   5    1.09    1.89
   1   4  -5  275.31    9.43
  -1   4  -5  277.83    9.41
   1  -4  -5  279.01    9.25
  -1  -4  -5  276.21    8.73
  -1   4   5  264.26   10.74
   1   4   5  255.53    9.93
  -1   4   5  277.77    9.78
   1   4   5  272.33   10.98
   2   4  -5  115.93    9.39
  -2   4  -5  115.59    5.54
   2  -4  -5  112.80    4.91
  -2  -4  -5  117.72    5.18
   2   4   5  112.76    6.00
  -2   4   5  117.79    6.36
   2   4   5  121.53    5.76
   3   4  -5  323.64   11.10
  -3   4  -5  360.00   11.22
  -3  -4  -5  355.45   11.17
   3   4   5  323.50   11.64
  -3   4   5  313.98   13.74
   3   4   5  335.20   10.53
   4   4  -5    7.46    2.64
  -4   4  -5    5.47    1.81
   4  -4  -5    6.48    2.28
  -4  -4  -5    6.88    1.86
   4  -4   5    3.59    1.20
   4   4   5    8.47    3.69
   4   4  -5    6.33    0.91
   4  -4   5    5.69    2.09
  -4   4   5    9.08    3.54
   4   4   5    6.64    2.71
   5   4  -5  196.04    9.61
  -5   4  -5  201.59    7.05
   5  -4  -5  185.84    5.62
  -5  -4  -5  190.55    8.15
   5   4   5  183.88   10.33
   5   4  -5  177.77    5.28
   5  -4   5  182.63    5.29
  -5   4   5  208.07   13.80
   5   4   5  199.64    7.22
   6   4  -5  166.74   12.76
  -6   4  -5  179.75    8.25
   6  -4  -5  152.61    6.83
  -6  -4  -5  165.14   10.31
   6   4   5  161.25   10.00
   6   4  -5  170.44    7.41
   6  -4   5  166.82    7.21
  -6   4   5  177.81   14.25
   6   4   5  169.19    8.51
   7   4  -5   40.25   10.41
  -7   4  -5   42.31    3.17
   7  -4  -5   34.21    3.30
  -7  -4  -5   38.52    5.95
   7   4   5   36.29    4.99
   7   4  -5   40.61    2.57
   7  -4   5   38.34    2.49
  -7   4   5   47.83    9.05
   7   4   5   39.82    4.57
   8   4  -5   13.26    4.79
  -8   4  -5    9.34    1.83
   8  -4  -5    7.99    1.16
  -8  -4  -5    9.24    2.86
   8   4   5    8.40    3.82
   8   4  -5   11.35    4.03
   8  -4   5    8.54    3.03
  -8   4   5   11.92    4.06
   8   4   5   11.05    1.88
   9   4  -5   83.43   20.94
  -9   4  -5   87.93    4.35
  -9  -4  -5   88.02    7.03
   9   4   5   73.27   10.18
   9   4  -5   83.50    4.76
   9  -4   5   79.22    4.54
  -9   4   5   88.09    9.36
   9   4   5   69.32    3.36
  10   4  -5   65.65   17.25
 -10   4  -5   66.29    3.59
 -10  -4  -5   60.60    6.33
  10   4   5   61.26    6.14
  10   4  -5   66.93    4.46
  10  -4   5   64.07    4.11
 -10   4   5   68.02   11.86
  10   4   5   55.35    2.63
  11   4  -5   54.05   15.23
 -11   4  -5   53.10    4.99
 -11  -4  -5   52.34    5.61
  11   4   5   53.79    5.54
  11   4  -5   57.20   10.01
  11  -4   5   56.41    7.12
 -11   4   5   55.97   11.01
 -11  -4   5   49.27    3.66
  12   4  -5  148.01   19.77
 -12  -4  -5  140.20   10.60
  12   4   5  148.87   10.78
  12   4  -5  146.24   10.41
  12  -4   5  157.33    9.57
 -12   4   5  158.41   13.95
  13   4  -5   43.86   13.39
 -13  -4  -5   37.82    8.39
  13   4   5   34.77    4.51
  13   4  -5   30.63    9.00
  13  -4   5   37.27   10.43
  13  -4  -5   45.02    6.11
 -13   4   5   39.78    7.89
  14   4  -5    3.03    3.08
 -14  -4  -5    4.12    3.66
  14   4   5    5.11    3.72
  14   4  -5    1.80    2.31
  14  -4   5    3.21    2.66
  14  -4  -5    3.94    3.40
 -14   4   5    1.56    2.58
  15   4  -5   17.87    8.25
 -15  -4  -5   20.06    4.25
  15   4   5   16.36    4.17
  15   4  -5   12.32    6.77
  15  -4   5   20.08    3.51
  15  -4  -5   18.68    9.35
 -15   4   5   16.82    6.28
  16   4  -5   10.71    4.56
 -16  -4  -5    8.09    3.16
  16   4   5    8.86    3.52
  16   4  -5    7.24    4.57
  16  -4   5    8.59    3.84
  16  -4  -5   14.48    3.95
 -16   4   5    9.29    5.66
  17   4  -5    2.11    3.35
 -17  -4  -5    4.76    3.10
  17   4   5    0.67    2.28
  17   4  -5    1.10    2.08
  17  -4   5   -0.25    1.37
  17  -4  -5    3.95    3.81
 -17   4   5    2.14    2.26
  18   4  -5   13.34    4.58
 -18  -4  -5    6.23    2.91
  18   4   5    7.72    3.65
  18   4  -5    3.32    2.52
  18  -4   5    6.33    3.54
  18  -4  -5    3.71    3.12
 -18   4   5   10.37    3.67
  19   4  -5    8.07    3.45
 -19  -4  -5    7.97    3.57
  19   4   5    4.30    3.08
  19   4  -5    6.46    4.59
  19  -4  -5    7.22    3.79
 -19   4   5   13.47    6.82
  20   4  -5    6.86    4.90
 -20  -4  -5    7.08    4.99
  20   4   5    4.67    5.95
  20   4  -5    7.27    3.54
  20  -4   5   11.37    4.71
  20  -4  -5   12.72    3.84
 -20   4   5   11.06    7.17
  21   4  -5   12.57    4.68
 -21  -4  -5   11.85    3.95
  21   4   5    7.97    6.02
  21   4  -5    8.63    3.63
  21  -4   5   10.25    3.09
  21  -4  -5    6.99    5.82
 -21   4   5    9.35    5.30
   0   4  -6    2.15    2.53
   0  -4  -6    3.66    2.43
   0   4   6    2.40    2.55
   0   4   6    2.58    2.97
   1   4  -6   68.88    5.07
  -1   4  -6   62.20    4.48
   1  -4  -6   68.42    3.88
  -1  -4  -6   72.24    4.29
  -1   4   6   61.17    6.30
   1   4   6   70.23   11.17
  -1   4   6   71.88    5.11
   1   4   6   69.61    4.75
  -2   4  -6    0.53    1.29
   2  -4  -6    0.23    1.25
  -2  -4  -6    1.01    1.34
   2   4   6    1.44    1.71
  -2   4   6    2.65    2.73
   2   4   6    0.79    1.48
   3   4  -6   31.86    4.21
   3  -4  -6   28.84    2.58
  -3  -4  -6   29.26    2.89
   3   4   6   29.16    8.32
  -3   4   6   30.39    3.78
   3   4   6   31.24    2.94
   4   4  -6  154.66    8.53
  -4   4  -6  178.46    8.62
  -4  -4  -6  170.81    8.60
   4   4   6  158.99   12.06
   4  -4   6  131.21    5.07
  -4   4   6  160.64   10.26
   4   4   6  178.68    8.98
   5   4  -6  342.03   16.88
  -5   4  -6  351.58   14.59
   5  -4  -6  336.45   13.30
  -5  -4  -6  314.24   14.29
   5   4   6  317.11   16.47
   5   4  -6  308.46   11.81
   5  -4   6  305.17   11.68
  -5   4   6  322.16   16.51
   5   4   6  353.28   14.86
   6   4  -6   19.59    3.94
  -6   4  -6   18.83    2.85
   6  -4  -6   18.33    1.96
  -6  -4  -6   18.67    2.86
   6   4   6   21.76    7.27
   6   4  -6   16.32    1.60
   6  -4   6   17.19    1.65
  -6   4   6   21.85    7.20
   6   4   6   20.49    2.50
   7   4  -6   74.89    8.91
   7  -4  -6   75.84    3.43
  -7  -4  -6   80.87    6.24
   7   4   6   71.28   10.52
   7   4  -6   82.90    3.88
   7  -4   6   72.15    5.35
  -7   4   6   76.60   10.70
   7   4   6   79.23    4.44
   8   4  -6  105.40    7.21
  -8   4  -6  101.34    5.23
   8  -4  -6   96.90    3.94
  -8  -4  -6  105.15    8.18
   8   4   6   95.47    9.98
   8   4  -6  106.50    4.69
   8  -4   6  102.07    4.69
  -8   4   6  102.98   11.50
   8   4   6   98.51    4.64
   9   4  -6  308.39   16.06
   9  -4  -6  276.42   10.91
  -9   4  -6  311.93   13.34
  -9  -4  -6  281.70   14.15
   9   4   6  268.34   15.63
   9   4  -6  301.21   12.96
   9  -4   6  310.57   13.03
  -9   4   6  300.88   16.47
   9   4   6  286.69   12.16
  10   4  -6  371.37   23.36
  10  -4  -6  345.50   17.57
 -10   4  -6  381.72   19.92
 -10  -4  -6  341.45   19.81
  10   4   6  337.80   21.29
  10   4  -6  367.28   19.55
 -10   4   6  344.85   21.80
  10   4   6  337.16   17.66
  11   4  -6  225.32   28.58
 -11   4  -6  232.59   12.97
 -11  -4  -6  214.87   13.84
  11   4   6  205.90   15.00
  11   4  -6  225.84   13.09
  11  -4   6  246.50   14.26
 -11   4   6  223.69   22.07
  11   4   6  193.20   10.59
 -11  -4   6  210.29   11.31
  12   4  -6   14.01    4.79
 -12   4  -6   11.80    3.45
 -12  -4  -6    9.04    4.54
  12   4   6   10.59    3.24
  12   4  -6    8.59    3.80
  12  -4   6    9.15    2.60
 -12   4   6   14.01    4.88
  13   4  -6   13.52    5.69
 -13  -4  -6    9.82    3.34
  13   4   6   12.94    3.91
  13   4  -6    5.81    3.15
  13  -4   6    7.78    2.68
  13  -4  -6   12.73    5.99
 -13   4   6   11.78    4.46
  14   4  -6  167.48   19.88
 -14  -4  -6  154.55   10.03
  14   4   6  170.32   10.15
  14   4  -6  123.18    7.72
  14  -4   6  167.07   11.06
  14  -4  -6  194.26   10.57
 -14   4   6  155.20   13.59
  15   4  -6    2.23    3.33
 -15  -4  -6    2.22    2.83
  15   4   6    2.05    3.17
  15   4  -6    1.23    2.23
  15  -4   6    1.65    1.58
  15  -4  -6    3.50    4.05
 -15   4   6    1.21    2.22
  16   4  -6    2.74    2.83
 -16  -4  -6    2.47    2.53
  16   4   6    1.11    2.23
  16   4  -6    0.28    1.17
  16  -4   6    3.14    2.63
 -16   4   6    0.19    1.83
  17   4  -6   12.89    5.65
 -17  -4  -6   15.84    4.17
  17   4   6   15.00    4.53
  17   4  -6    7.31    3.65
  17  -4   6   10.27    4.48
  17  -4  -6   16.78    4.65
 -17   4   6   10.76    5.33
  18   4  -6    4.07    5.18
 -18  -4  -6    3.09    3.60
  18   4   6    4.11    2.88
  18   4  -6    1.66    2.48
  18  -4   6    1.74    2.33
  18  -4  -6    2.38    3.15
 -18   4   6    1.23    2.68
  19   4  -6    1.56    2.50
 -19  -4  -6    4.50    4.69
  19   4   6    0.03    2.72
  19   4  -6    0.36    2.20
  19  -4   6    0.56    1.33
  19  -4  -6    0.06    2.26
 -19   4   6    1.82    2.61
  20   4  -6   37.65   17.75
 -20  -4  -6   33.47    9.58
  20   4   6   41.08    8.44
  20   4  -6   24.92   13.79
  20  -4   6   29.37   12.41
  20  -4  -6   40.27    6.54
 -20   4   6   34.76   16.01
  21   4  -6    0.55    2.51
 -21  -4  -6    3.03    3.67
  21   4   6    4.99    4.31
  21   4  -6    1.20    2.81
  21  -4   6    0.65    1.71
  21  -4  -6    1.13    2.60
 -21   4   6    1.52    2.94
   0   4  -7    2.70    2.35
   0  -4  -7    1.52    1.93
   0   4   7    0.58    1.37
   0   4   7   -0.04    1.56
   1   4  -7  212.16   10.54
  -1   4  -7  221.37   10.90
   1  -4  -7  214.80    9.63
  -1  -4  -7  212.54    9.85
  -1   4   7  203.03   12.38
   1   4   7  208.28   11.55
  -1   4   7  223.89   11.11
   1   4   7  212.62   10.58
   2   4  -7   12.68    2.67
  -2   4  -7   16.39    2.97
   2  -4  -7   17.98    5.34
  -2  -4  -7   17.58    2.50
   2   4   7   16.08    5.32
  -2   4   7   13.87    2.95
   2   4   7   18.08    3.26
   3   4  -7   19.93    3.50
  -3   4  -7   18.38    2.95
   3  -4  -7   17.52    2.29
  -3  -4  -7   19.28    3.54
   3   4   7   16.48    6.16
  -3   4   7   14.91    2.55
   3   4   7   19.74    2.83
   4   4  -7  290.34   10.74
  -4   4  -7  290.82    9.41
   4  -4  -7  286.33    8.12
  -4  -4  -7  287.72    9.53
   4   4   7  267.51   13.87
  -4   4   7  269.19   14.15
   4   4   7  277.36   11.02
   5   4  -7  190.56    8.85
  -5   4  -7  167.78    6.73
   5  -4  -7  183.38    7.73
  -5  -4  -7  188.53    8.18
   5   4   7  168.76   20.29
   5  -4   7  158.88    4.13
   5   4  -7  155.55    4.09
  -5   4   7  186.80    8.47
   5   4   7  186.12    7.27
   6   4  -7   35.23   11.05
  -6   4  -7   32.86    3.72
   6  -4  -7   33.48    5.88
  -6  -4  -7   35.15    4.52
   6   4   7   38.43    6.16
   6  -4   7   35.57    2.03
  -6   4   7   39.21   10.59
   6   4   7   37.11    2.99
   7   4  -7  269.78   13.66
  -7   4  -7  296.55   13.33
   7  -4  -7  291.43   11.87
  -7  -4  -7  274.53   13.51
   7   4   7  263.08   14.43
   7  -4   7  285.01   11.52
   7   4  -7  280.34   11.36
  -7   4   7  254.83   17.60
   7   4   7  274.21   12.52
   8   4  -7  338.27   16.48
  -8   4  -7  351.80   15.06
   8  -4  -7  315.64   13.64
  -8  -4  -7  335.61   15.71
   8   4   7  326.17   16.28
   8  -4   7  345.42   13.85
   8   4  -7  329.06   13.33
  -8   4   7  317.65   17.12
   8   4   7  333.32   13.96
   9   4  -7   25.18    7.13
   9  -4  -7   28.64    2.79
  -9   4  -7   30.12    3.69
  -9  -4  -7   27.17    5.09
   9   4   7   29.88   12.99
   9  -4   7   28.13    2.70
   9   4  -7   27.11    2.81
  -9   4   7   28.86    7.61
   9   4   7   27.17    2.98
  10   4  -7  109.84   22.13
 -10   4  -7  109.14    6.52
 -10  -4  -7  102.17    7.87
  10   4   7   90.90   10.86
  10  -4   7  110.84    6.27
  10   4  -7   91.93    5.56
 -10   4   7   88.29   14.57
  10   4   7   87.25    5.78
  11   4  -7   11.17    5.23
 -11   4  -7   10.71    3.85
 -11  -4  -7    9.26    2.90
  11   4   7    9.14    3.62
  11  -4   7   10.43    2.23
  11   4  -7   10.54    4.22
 -11   4   7   14.14    5.15
  11   4   7    8.63    4.40
  12   4  -7    3.52    3.73
 -12   4  -7    0.97    1.39
 -12  -4  -7    2.26    4.01
  12   4   7    2.21    2.04
  12  -4   7    1.53    2.03
  12   4  -7    0.27    0.90
 -12   4   7    2.07    2.08
  13   4  -7   96.57   18.20
 -13   4  -7  110.32    6.09
 -13  -4  -7  111.79    8.44
  13   4   7   90.35    8.51
  13  -4   7   97.79    8.83
  13   4  -7   77.97    7.01
 -13   4   7  112.51   18.98
  14   4  -7   22.62    7.44
 -14  -4  -7   28.52    7.68
  14   4   7   21.12    4.93
  14  -4   7   28.21    8.10
  14   4  -7   15.36    7.64
  14  -4  -7   25.00   11.02
 -14   4   7   26.36    8.80
  15   4  -7    4.45    2.99
 -15  -4  -7    5.70    4.48
  15   4   7    5.93    4.24
  15  -4   7    4.75    3.03
  15   4  -7    1.03    1.25
  15  -4  -7    4.30    3.68
 -15   4   7    3.80    2.62
  16   4  -7   10.31    5.51
 -16  -4  -7    8.31    4.69
  16   4   7    8.85    3.71
  16  -4   7    8.94    3.42
  16   4  -7    6.26    2.81
  16  -4  -7    7.42    3.15
 -16   4   7   13.48    5.85
  17   4  -7   75.26   19.56
 -17  -4  -7   90.39    8.20
  17   4   7   81.78    9.17
  17  -4   7   69.32   14.17
  17   4  -7   57.46   16.42
  17  -4  -7  107.44   10.66
 -17   4   7   74.86   17.75
  18   4  -7   25.84   11.23
 -18  -4  -7   32.05    5.62
  18   4   7   25.20    5.36
  18  -4   7   24.44   10.41
  18   4  -7   20.37   10.39
  18  -4  -7   41.06    6.98
 -18   4   7   32.54   14.74
  19   4  -7   30.22   12.17
 -19  -4  -7   26.53    4.63
  19   4   7   19.81   14.00
  19  -4   7   28.80    4.68
  19   4  -7   18.08    9.19
  19  -4  -7   32.50    7.50
 -19   4   7   27.50   12.27
 -20  -4  -7    2.11    2.87
  20   4   7    3.51    3.09
  20  -4  -7    0.92    2.53
   0   4  -8    7.81    2.96
   0  -4  -8    6.31    1.64
   0   4   8    6.79    3.19
   0   4   8    5.55    2.38
   1   4  -8  240.70    9.04
  -1   4  -8  255.73    9.79
   1  -4  -8  244.74    8.67
  -1  -4  -8  241.42    8.10
  -1   4   8  223.44    9.85
   1   4   8  249.20   10.41
  -1   4   8  240.37    9.26
   1   4   8  227.23    9.30
   2   4  -8  130.50    7.29
  -2   4  -8  106.91    6.31
   2  -4  -8  125.76    5.69
  -2  -4  -8  125.24    6.29
   2   4   8  120.31   17.71
  -2   4   8  123.16    9.99
   2   4   8  125.45    6.90
   3   4  -8    2.67    1.83
  -3   4  -8    1.91    2.08
   3  -4  -8    2.97    2.11
  -3  -4  -8    2.29    2.18
   3   4   8    0.76    2.07
  -3   4   8    2.45    2.32
   3   4   8    4.24    2.14
   4   4  -8   40.96    5.40
  -4   4  -8   31.20    3.70
   4  -4  -8   35.69    3.20
  -4  -4  -8   31.71    3.84
   4   4   8   34.59   13.07
  -4   4   8   36.36    4.13
   4   4   8   34.01    3.31
   5   4  -8   68.52    6.12
  -5   4  -8   68.53    4.90
   5  -4  -8   64.52    3.44
  -5  -4  -8   77.19   13.48
   5   4   8   72.63    8.13
  -5   4   8   63.93    4.76
   6   4  -8   79.09    8.84
  -6   4  -8   92.02    8.72
   6  -4  -8   88.31    5.52
  -6  -4  -8   79.50    5.77
   6   4   8   78.80    9.04
  -6   4   8   72.67    5.22
   6   4   8   77.58    4.87
   7   4  -8   43.73   10.37
  -7   4  -8   35.70    4.21
   7  -4  -8   38.48    3.02
  -7  -4  -8   40.23    8.52
   7   4   8   41.77   13.17
   7  -4   8   30.68    1.90
  -7   4   8   42.12    8.74
   7   4   8   35.41    3.65
   8   4  -8  190.41   12.91
  -8   4  -8  208.80   12.33
   8  -4  -8  174.44   11.24
  -8  -4  -8  185.04   11.99
   8   4   8  175.51   12.66
   8   4  -8  176.21   10.00
  -8   4   8  180.32   13.04
   8   4   8  181.16   10.85
   9   4  -8   21.39    9.56
   9  -4  -8   20.00    2.73
  -9   4  -8   18.85    6.51
  -9  -4  -8   15.78    4.09
   9   4   8   18.20    7.08
   9  -4   8   14.13    1.91
   9   4  -8   14.79    4.35
  -9   4   8   18.18    5.13
   9   4   8   17.16    5.19
  10   4  -8    2.91    3.69
  10  -4  -8    4.11    1.49
 -10   4  -8    3.59    2.29
 -10  -4  -8    4.99    2.87
  10   4   8    4.56    3.58
  10  -4   8    2.59    1.48
  10   4  -8    4.40    1.77
 -10   4   8    6.12    3.54
  10   4   8    4.19    1.97
  11   4  -8  241.96   16.25
 -11   4  -8  238.89   16.46
 -11  -4  -8  219.92   13.35
  11   4   8  209.75   17.00
  11  -4   8  227.03   12.22
  11   4  -8  185.11   10.22
 -11   4   8  233.27   15.82
  11   4   8  194.65   10.30
  12   4  -8  116.27   18.28
 -12   4  -8  106.77    9.35
 -12  -4  -8   96.51    7.80
  12   4   8   94.85   18.52
  12  -4   8  105.21    6.07
  12   4  -8   78.96    5.83
 -12   4   8  109.18   19.17
  13   4  -8  103.93   16.49
 -13   4  -8  101.10    9.38
 -13  -4  -8   99.57    8.45
  13   4   8   94.55    8.77
  13  -4   8   98.69    6.65
  13   4  -8   77.44   13.61
 -13   4   8  103.98   16.26
 -14  -4  -8   25.17    7.42
  14   4   8   17.97    5.00
  14  -4   8   19.75    3.33
  14   4  -8   17.05    5.91
  14  -4  -8   21.10    7.42
 -14   4   8   18.37    9.88
 -15  -4  -8    2.51    2.97
  15   4   8    0.67    3.15
  15   4  -8    0.41    1.58
  15  -4  -8    3.00    4.27
 -15   4   8    2.28    3.52
  16   4  -8  336.00   23.73
 -16  -4  -8  379.30   19.13
  16   4   8  371.00   14.04
  16  -4   8  372.20   10.20
  16  -4  -8  396.72   14.34
 -16   4   8  354.18   23.41
  17   4  -8  143.51   28.31
 -17  -4  -8  176.14   12.36
  17   4   8  165.46   12.38
  17  -4   8  149.13    9.57
  17  -4  -8  180.03   11.73
 -17   4   8  169.25   11.69
  18   4  -8    0.57    2.08
 -18  -4  -8    4.08    3.99
  18   4   8    0.33    2.56
  18  -4   8    2.75    2.52
  18   4  -8    4.14    3.55
  18  -4  -8   30.37    5.51
 -18   4   8    1.14    2.97
  19   4  -8    3.54    4.05
 -19  -4  -8    4.77    3.59
  19   4   8    1.13    2.91
  19  -4   8    1.45    2.17
  19   4  -8    0.21    1.95
  19  -4  -8    1.20    3.58
 -19   4   8    0.26    2.38
   0   4  -9    1.70    2.14
   0  -4  -9    2.89    3.10
   0   4   9    1.03    1.51
   0   4   9    1.63    2.10
   1   4  -9    0.84    2.20
  -1   4  -9    1.03    1.50
   1  -4  -9    1.39    1.62
  -1  -4  -9    1.32    2.20
  -1   4   9    1.78    2.14
   1   4   9    2.14    2.65
  -1   4   9    1.85    2.29
   1   4   9    2.02    2.24
   2   4  -9   21.63    4.06
  -2   4  -9   16.25    5.49
   2  -4  -9   14.56    2.39
  -2  -4  -9   13.89    2.53
   2   4   9   20.73    6.01
  -2   4   9   13.50    3.36
   2   4   9   14.13    2.71
   3   4  -9   62.35    5.82
  -3   4  -9   63.91    5.40
   3  -4  -9   55.19    4.93
  -3  -4  -9   57.24    4.37
   3   4   9   67.21    5.42
  -3   4   9   60.32    5.14
   3   4   9   56.38    4.22
   4   4  -9  166.42   11.37
  -4   4  -9  160.52   10.13
   4  -4  -9  153.18   11.19
  -4  -4  -9  162.73   10.69
   4   4   9  147.44   11.39
  -4   4   9  146.58    9.89
   4   4   9  166.24   10.41
   5   4  -9    9.36    3.77
  -5   4  -9    7.29    2.54
   5  -4  -9    7.58    2.08
  -5  -4  -9    9.33    2.78
   5   4   9    7.90    4.03
  -5   4   9    7.90    2.57
   5   4   9    7.78    2.63
   6   4  -9   20.77    4.64
  -6   4  -9   16.40    3.37
   6  -4  -9   16.46    2.65
  -6  -4  -9   18.73    7.48
   6   4   9   14.95    7.23
  -6   4   9   15.38    7.52
   6   4   9   14.00    2.95
   7   4  -9   22.31    4.82
  -7   4  -9   18.64    3.64
   7  -4  -9   20.08    2.66
  -7  -4  -9   21.73    7.87
   7   4   9   22.11    7.07
  -7   4   9   21.71    3.63
   7   4   9   20.91    6.81
   8   4  -9  192.68   22.15
  -8   4  -9  204.44   11.59
   8  -4  -9  187.17   10.93
  -8  -4  -9  206.81   15.47
   8   4   9  189.55   13.22
  -8   4   9  186.54   11.79
   8   4   9  186.69   11.57
   9   4  -9   15.76    4.40
   9  -4  -9   18.45    2.73
  -9   4  -9   16.45    5.09
  -9  -4  -9   18.13    4.09
   9   4   9   18.17    8.29
  -9   4   9   20.24    4.89
   9   4   9   15.11    5.08
  10   4  -9    5.30    5.21
  10  -4  -9    0.68    1.11
 -10  -4  -9    2.54    2.17
  10   4   9    3.79    3.92
 -10   4   9    1.47    3.03
  10   4   9    0.93    1.42
  11   4  -9  127.42   10.85
 -11   4  -9  116.64   10.70
 -11  -4  -9  109.48    8.58
  11   4   9  107.58    8.81
 -11   4   9  110.53   10.40
  11   4   9   95.59    5.78
  12   4  -9   13.90    5.05
 -12   4  -9   13.32    2.99
 -12  -4  -9   14.65    3.46
  12   4   9   11.14    5.68
 -12   4   9   16.61    7.65
 -12  -4   9   11.58    2.27
  13   4  -9   46.89   17.04
 -13   4  -9   34.53    7.02
 -13  -4  -9   34.45   12.18
  13   4   9   39.25    7.76
  14   4  -9   34.07    9.50
 -14  -4  -9   35.42    6.12
  14   4   9   27.68   12.47
  15   4  -9   81.39   14.70
 -15  -4  -9   63.18    6.51
  15   4   9   65.23    8.94
  15  -4  -9   80.31    8.00
 -15   4   9   62.49   14.50
 -16  -4  -9    0.26    1.86
  16   4   9    1.54    2.22
  16  -4  -9   -0.07    1.69
 -16   4   9    1.65    2.94
  17   4  -9   15.43    6.54
 -17  -4  -9   18.05    4.66
  17   4   9   15.82    5.18
  17  -4  -9   20.03    6.68
 -17   4   9   14.21    6.66
  18   4  -9    1.61    2.48
 -18  -4  -9    2.49    2.92
  18   4   9    1.36    2.89
  18  -4  -9    3.44    4.49
 -18   4   9    3.22    4.77
   0   4 -10    9.87    3.60
   0  -4 -10    9.57    2.59
   0   4  10    5.46    3.36
   0   4  10    9.10    3.49
   1   4 -10   31.38    4.84
  -1   4 -10   27.81    4.36
   1  -4 -10   28.17    3.36
  -1  -4 -10   28.66    5.44
  -1   4  10   34.56   11.33
   1   4  10   39.23   12.23
  -1   4  10   30.27    8.62
   1   4  10   31.91    8.44
   2   4 -10   27.16    8.50
  -2   4 -10   26.07    4.46
   2  -4 -10   27.14    8.20
  -2  -4 -10   28.79   10.08
   2   4  10   32.41   10.06
  -2   4  10   27.73    7.08
   2   4  10   25.67    7.77
   3   4 -10   23.52    4.28
  -3   4 -10   21.88    3.96
  -3  -4 -10   15.86    3.26
   3   4  10   20.98    5.80
  -3   4  10   17.37    3.46
   3   4  10   22.05    6.14
   4   4 -10   87.94   18.90
  -4   4 -10   80.38    6.69
   4  -4 -10   80.49    5.56
  -4  -4 -10   87.76    6.54
   4   4  10   87.55   15.87
  -4   4  10   86.33    6.90
   4   4  10   83.64    6.88
   5   4 -10   40.83    5.59
  -5   4 -10   42.42    4.98
  -5  -4 -10   43.70   13.13
   5   4  10   43.14    9.26
  -5   4  10   36.18    4.77
   5   4  10   36.58    4.69
   6   4 -10   63.10    7.57
  -6   4 -10   59.22    5.96
  -6  -4 -10   54.30    6.20
   6   4  10   59.58    9.50
  -6   4  10   59.96   11.40
   6   4  10   54.01    5.05
   7   4 -10    1.29    3.28
  -7   4 -10    2.53    1.92
   7  -4 -10    2.58    2.06
  -7  -4 -10    2.36    3.07
   7   4  10    1.92    3.64
  -7   4  10    1.23    2.20
   7   4  10    1.56    2.56
   8   4 -10  229.99   12.70
  -8   4 -10  224.10   14.67
  -8  -4 -10  204.05   10.47
   8   4  10  194.63   20.38
  -8   4  10  216.81   11.28
   9   4 -10  535.57   22.62
   9  -4 -10  498.40   17.31
  -9   4 -10  551.98   19.73
  -9  -4 -10  525.89   20.47
   9   4  10  496.47   22.13
  -9   4  10  506.74   20.68
   9   4  10  486.49   17.86
  10   4 -10   17.23    5.31
  10  -4 -10   22.73    3.01
 -10   4 -10   15.46    3.41
 -10  -4 -10   15.33    3.93
  10   4  10   19.69    9.41
 -10   4  10   17.35    7.59
  10   4  10   15.98    3.10
  11   4 -10   12.70    7.33
 -11   4 -10    9.89    3.75
 -11  -4 -10   10.58    3.66
  11   4  10   12.03    6.70
 -11   4  10   14.07    7.75
  11   4  10   13.42    3.00
  12   4 -10   59.52    8.40
 -12   4 -10   47.03   13.79
 -12  -4 -10   55.45   12.30
  12   4  10   52.78   15.77
 -12   4  10   54.45   16.12
 -12  -4  10   51.01    5.37
  13   4 -10    3.69    4.87
 -13   4 -10    0.95    1.25
 -13  -4 -10    2.01    2.69
  13   4  10    2.10    3.56
 -13   4  10    1.50    3.52
  14   4 -10   41.51   15.06
 -14  -4 -10   35.26    5.42
  14   4  10   32.84   13.92
 -14   4  10   35.59   15.23
  15   4 -10  116.71   26.16
 -15  -4 -10   95.28   16.51
  15   4  10   99.54   24.24
  15  -4 -10  136.98   12.43
 -15   4  10  131.35   24.37
  16   4 -10    6.92    3.65
 -16  -4 -10    8.45    5.55
  16   4  10    6.24    4.18
  16  -4 -10    5.04    3.20
 -16   4  10   10.17    5.45
  17   4 -10   45.92   15.93
 -17  -4 -10   56.99   12.19
  17   4  10   40.02   16.17
  17  -4 -10   57.56   11.73
 -17   4  10   51.64   13.85
   0   4 -11    1.39    1.69
   0  -4 -11    0.75    1.59
   0   4  11    0.31    1.86
   0   4  11   -0.18    1.85
   1   4 -11   19.06    5.63
  -1   4 -11   19.42    4.74
   1  -4 -11   18.70    5.88
  -1  -4 -11   15.72    3.98
   1   4  11   13.96    6.46
  -1   4  11   15.81    6.73
   1   4  11   16.34    5.03
   2   4 -11  305.66   17.11
  -2   4 -11  276.62   15.51
   2  -4 -11  282.49   15.35
  -2  -4 -11  282.96   15.34
   2   4  11  309.75   20.72
  -2   4  11  287.32   16.24
   2   4  11  287.06   16.11
   3   4 -11   47.32    6.13
  -3   4 -11   40.90    5.60
   3  -4 -11   48.42    4.79
  -3  -4 -11   42.98    5.05
   3   4  11   46.60    7.97
  -3   4  11   40.02    4.85
   3   4  11   48.11    5.35
   4   4 -11    1.51    3.45
  -4   4 -11    1.16    1.72
   4  -4 -11    0.95    1.98
  -4  -4 -11    0.04    1.98
   4   4  11    4.46    6.01
  -4   4  11    0.99    1.90
   4   4  11    2.39    1.78
   5   4 -11   87.86    8.49
  -5   4 -11   80.27   10.35
   5  -4 -11   90.37    6.18
  -5  -4 -11   79.78    6.76
   5   4  11   80.63   15.94
  -5   4  11   77.33    6.70
   5   4  11   88.32    6.79
   6   4 -11   52.15    7.07
  -6   4 -11   52.60    5.85
  -6  -4 -11   50.43    5.24
   6   4  11   47.74   10.17
  -6   4  11   47.88    5.19
   6   4  11   55.47    5.76
   7   4 -11   66.61    7.81
  -7   4 -11   65.88    6.32
   7  -4 -11   66.28    7.63
  -7  -4 -11   63.97    5.59
   7   4  11   61.48   19.77
  -7   4  11   66.97   13.01
   7   4  11   63.76    5.77
   8   4 -11   30.45    5.40
  -8   4 -11   25.13    4.32
   8  -4 -11   29.97    3.70
  -8  -4 -11   21.94    5.32
   8   4  11   27.83    9.93
  -8   4  11   27.42   11.17
   8   4  11   25.58    7.81
   9   4 -11    7.05    4.99
   9  -4 -11    3.34    2.02
  -9   4 -11    5.44    2.95
  -9  -4 -11    2.83    3.29
   9   4  11    4.93    2.69
  -9   4  11    5.61    3.28
  10   4 -11   45.57    8.02
 -10   4 -11   34.77   10.77
 -10  -4 -11   41.88    6.22
  10   4  11   39.76   10.54
 -10   4  11   35.60    7.55
  10   4  11   39.65    5.65
  11   4 -11   37.47   16.86
 -11   4 -11   41.45    5.43
 -11  -4 -11   41.87    9.69
  11   4  11   42.32   17.69
 -11   4  11   42.74    6.67
  11   4  11   37.40    4.56
  12   4 -11    5.58    2.94
 -12   4 -11   10.86    4.79
 -12  -4 -11    9.20    5.12
  12   4  11   14.95    8.01
 -12   4  11   10.75    6.87
 -12  -4  11    8.77    2.49
  13   4 -11  103.62   13.64
 -13   4 -11   87.93    8.77
 -13  -4 -11   96.12   12.19
  13   4  11   89.32   17.24
 -13   4  11   98.14   20.88
  14   4 -11    6.03    4.22
 -14  -4 -11   25.93    4.35
  14   4  11    5.22    4.44
 -14   4  11    9.33    4.30
  15   4 -11   24.94   13.52
 -15  -4 -11   22.58    5.89
  15   4  11   20.04   10.78
  15  -4 -11   23.18   15.91
 -15   4  11   30.01   10.06
  16   4 -11   85.57   16.99
 -16  -4 -11   72.18   18.59
  16   4  11   73.62   16.64
 -16   4  11   88.68   20.12
   0   4 -12   42.33    6.10
   0  -4 -12   34.48    5.98
   0   4  12   40.00    7.91
   0   4  12   47.41    5.95
   1   4 -12  239.25   14.35
  -1   4 -12  231.79   13.68
   1  -4 -12  250.58   12.88
  -1  -4 -12  254.98   13.25
   1   4  12  243.88   13.55
  -1   4  12  253.23   13.98
   1   4  12  260.07   14.23
   2   4 -12   36.74   11.48
  -2   4 -12   41.99    6.61
   2  -4 -12   40.45   10.09
  -2  -4 -12   40.42   10.35
   2   4  12   48.72   15.12
  -2   4  12   43.50    5.66
   3   4 -12   85.26    8.02
  -3   4 -12   92.09    8.55
   3  -4 -12   83.49    9.40
  -3  -4 -12   83.24    6.36
   3   4  12   88.73   13.46
  -3   4  12   95.52    7.89
   3   4  12   90.11    6.97
   4   4 -12   79.82    9.12
  -4   4 -12   68.62    7.48
   4  -4 -12   79.19    7.32
  -4  -4 -12   83.18    6.96
   4   4  12   83.83    7.92
  -4   4  12   74.27    6.58
   4   4  12   78.68    6.94
   5   4 -12  149.92   12.26
  -5   4 -12  139.83   10.94
   5  -4 -12  144.44   10.14
  -5  -4 -12  153.28   11.51
   5   4  12  140.36   12.61
  -5   4  12  153.42   11.96
   5   4  12  145.55   10.85
   6   4 -12   51.58    7.93
  -6   4 -12   38.25    5.47
   6  -4 -12   49.99    5.21
  -6  -4 -12   49.25   10.50
   6   4  12   54.74   15.73
  -6   4  12   54.06   16.66
   6   4  12   50.69    5.88
   7   4 -12    6.49    4.68
  -7   4 -12    2.64    2.92
   7  -4 -12    2.59    1.77
  -7  -4 -12    8.16    3.73
   7   4  12    2.34    2.90
  -7   4  12    4.86    3.59
   7   4  12    6.23    3.18
   8   4 -12   31.12    7.56
  -8   4 -12   19.94    3.94
   8  -4 -12   18.07    4.53
  -8  -4 -12   22.25    4.65
  -8   4  12   23.56    4.92
   8   4  12   19.92    8.44
   9   4 -12   24.42    6.33
  -9   4 -12   22.19    4.77
   9   4  12   18.87    9.06
  -9   4  12   23.70    5.21
  10   4 -12    3.81    3.65
 -10   4 -12    3.05    2.63
 -10  -4 -12    2.15    1.96
  10   4  12    4.40    3.53
 -10   4  12    1.91    2.24
  10   4  12    3.40    2.61
  11   4 -12    2.39    3.68
 -11   4 -12    0.53    1.36
 -11  -4 -12    2.46    2.75
  11   4  12    2.68    2.41
 -11   4  12    2.05    1.78
  11   4  12    0.76    1.32
  12   4 -12   62.35    9.90
 -12   4 -12   54.83   12.03
 -12  -4 -12   54.51   15.15
  12   4  12   50.68   20.11
 -12   4  12   60.21   12.35
  13   4 -12   26.13    6.83
 -13   4 -12   19.67    7.03
 -13  -4 -12   24.36    5.08
  13   4  12   18.76    7.63
 -13   4  12   21.51   11.22
  14   4 -12   10.99    5.58
 -14  -4 -12    8.46    3.74
  14   4  12    7.09    7.58
 -14   4  12   10.61    5.98
  15   4 -12   50.43   14.20
 -15  -4 -12   39.66    6.90
  15   4  12   37.10   16.18
  15  -4 -12   41.43    8.32
 -15   4  12   42.61   21.59
   0   4 -13    3.00    3.27
   0  -4 -13    1.22    1.89
   0   4  13    0.90    3.02
   1   4 -13    2.88    3.33
  -1   4 -13    4.92    3.02
   1  -4 -13    6.54    3.17
  -1  -4 -13    7.90    3.43
   1   4  13    3.74    4.37
  -1   4  13    4.21    3.43
   1   4  13    5.69    2.88
   2   4 -13    1.13    2.12
  -2   4 -13    2.47    3.48
   2  -4 -13    1.75    1.86
  -2  -4 -13    2.56    3.25
   2   4  13    1.98    2.33
  -2   4  13    3.82    3.77
   2   4  13    1.26    2.14
   3   4 -13    3.36    3.85
  -3   4 -13    3.37    2.87
   3  -4 -13    4.78    2.00
  -3  -4 -13    7.22    3.17
   3   4  13    5.17    4.10
  -3   4  13    6.18    3.36
   3   4  13    5.51    2.90
   4   4 -13    4.93    3.51
  -4   4 -13    4.84    2.84
   4  -4 -13    1.83    1.78
  -4  -4 -13    1.65    2.36
   4   4  13    2.32    2.19
  -4   4  13    4.28    2.16
   4   4  13    3.29    2.38
   5   4 -13   35.96    6.36
  -5   4 -13   29.03    4.83
   5  -4 -13   28.35    4.10
  -5  -4 -13   21.00    7.78
   5   4  13   33.56   12.78
  -5   4  13   31.60    4.98
   5   4  13   30.34    9.19
   6   4 -13    5.30    2.90
  -6   4 -13    4.47    2.56
   6  -4 -13    5.99    2.59
  -6  -4 -13    5.70    3.56
   6   4  13    8.93    4.68
  -6   4  13   10.91    4.23
   6   4  13    7.81    3.70
   7   4 -13    7.62    3.15
   7  -4 -13    7.14    4.26
  -7  -4 -13   14.26    3.84
   7   4  13   12.34    5.85
  -7   4  13   13.90    3.52
   7   4  13    9.89    3.20
   8   4 -13    5.62    3.20
  -8   4 -13    8.23    3.68
   8  -4 -13    5.46    3.84
  -8  -4 -13    7.70    2.96
   8   4  13    7.09    3.49
  -8   4  13    7.98    4.32
   8   4  13    6.45    4.64
   9   4 -13   44.71    7.83
  -9   4 -13   33.71    5.95
  -9  -4 -13   35.63    6.01
   9   4  13   37.14   12.95
  -9   4  13   34.93    7.20
   9   4  13   34.85    5.61
  10   4 -13   20.43    5.30
 -10   4 -13   19.85    4.44
 -10  -4 -13   19.47    4.39
  10   4  13   13.79    8.77
 -10   4  13   18.77    5.33
  10   4  13   20.20    4.42
  11   4 -13    2.43    2.67
 -11   4 -13    7.06    2.66
 -11  -4 -13    0.89    3.00
  11   4  13    4.11    2.73
 -11   4  13    7.79    3.76
  11   4  13    1.66    2.86
  12   4 -13   11.51    5.26
 -12  -4 -13   11.65    3.65
  12   4  13    4.94    2.68
 -12   4  13   11.98    7.38
  13   4 -13   29.43   25.04
 -13   4 -13   45.76    7.08
 -13  -4 -13   57.69    9.02
  13   4  13   33.30   11.75
 -13   4  13   40.51   19.99
   0  -4 -14   12.52    6.78
   0   4  14   18.27    5.05
   1   4 -14    8.20    3.45
  -1   4 -14    5.10    3.93
   1  -4 -14    5.62    2.89
  -1  -4 -14    5.33    2.27
   1   4  14    6.14    4.30
  -1   4  14    2.55    2.70
   1   4  14    4.63    3.72
   2   4 -14   52.52    6.71
  -2   4 -14   64.06    8.20
   2  -4 -14   59.52    9.11
  -2  -4 -14   60.10    8.67
   2   4  14   57.23   10.36
   2   4  14   71.45    7.76
   3   4 -14    6.42    2.98
  -3   4 -14    9.03    3.33
   3  -4 -14    9.22    5.11
  -3  -4 -14    9.54    5.76
   3   4  14    9.82    5.89
  -3   4  14   25.12    8.77
   3   4  14   11.25    3.67
   4   4 -14    2.94    4.16
  -4   4 -14    1.06    2.54
   4  -4 -14    1.13    1.74
  -4  -4 -14    0.24    1.00
   4   4  14    2.31    2.35
  -4   4  14    2.40    2.45
   5   4 -14    0.85    3.41
  -5   4 -14    1.96    2.58
  -5  -4 -14    3.44    3.00
   5   4  14    0.73    2.48
   5   4  14    0.82    2.35
   6   4 -14  272.34   19.70
  -6  -4 -14  247.55   18.14
   6   4  14  275.65   21.66
  -6   4  14  280.51   19.83
   6   4  14  276.39   19.25
   7   4 -14   23.60    5.69
  -7   4 -14   20.13    4.78
   7  -4 -14   17.28    4.06
  -7  -4 -14   21.76    4.25
   7   4  14   16.77    6.18
  -7   4  14   20.80    4.78
   7   4  14   13.06   10.92
   8   4 -14    4.96    4.18
  -8   4 -14    4.85    3.10
   8  -4 -14    1.50    1.43
  -8  -4 -14    4.86    3.05
   8   4  14    2.81    3.00
  -8   4  14    8.81    4.74
   8   4  14    3.89    3.37
   9   4 -14    2.75    4.38
   9  -4 -14    3.89    2.27
  -9   4 -14    2.51    2.44
  -9  -4 -14    1.50    1.80
   9   4  14    1.83    2.10
  -9   4  14    1.91    3.06
   9   4  14    0.89    1.66
  10   4 -14   10.06    4.88
 -10   4 -14   10.72    4.01
 -10  -4 -14   12.45    3.80
  10   4  14    6.78    5.29
 -10   4  14   12.13    5.04
  10   4  14    6.08    2.94
  11   4 -14    3.87    5.21
 -11   4 -14    0.55    1.72
 -11  -4 -14    2.72    3.15
  11   4  14    1.56    3.05
 -11   4  14    6.32    4.80
   0   4 -15    2.49    3.16
   0   4  15    1.55    2.69
   1   4 -15    6.59    3.47
  -1   4 -15    7.89    3.92
   1  -4 -15    6.26    2.53
  -1  -4 -15    6.24    3.73
  -1   4  15    9.28    7.10
   1   4  15    6.63    3.63
   2   4 -15    2.52    2.78
  -2   4 -15    0.48    1.96
   2  -4 -15    1.24    2.29
  -2  -4 -15    2.66    2.39
  -2   4  15    1.18    2.92
   2   4  15    3.38    3.42
   3   4 -15    0.86    2.51
  -3   4 -15    2.83    3.66
   3  -4 -15    1.26    2.14
  -3  -4 -15    2.40    3.05
   3   4  15    1.88    2.74
  -3   4  15    1.28    3.09
   3   4  15    0.87    3.21
   4   4 -15   25.11    5.81
  -4   4 -15   27.70    5.89
   4  -4 -15   23.14    4.91
  -4  -4 -15   26.16    4.81
   4   4  15   22.45   11.76
  -4   4  15   25.26   12.67
   4   4  15   25.50    4.75
  -5   4 -15    2.26    3.03
   5  -4 -15    3.22    2.06
  -5  -4 -15    3.69    2.21
   5   4  15    2.49    2.96
  -5   4  15    2.37    3.37
   5   4  15    4.26    4.27
  -6   4 -15   15.57    5.12
   6  -4 -15    9.58    6.24
  -6  -4 -15   17.95    5.31
   6   4  15   15.06    6.14
  -6   4  15   16.86    5.12
   6   4  15   11.90    7.46
   7   4 -15    1.64    3.68
  -7   4 -15    1.53    3.16
  -7  -4 -15    2.78    2.09
   7   4  15    1.36    2.47
  -7   4  15    5.93    5.07
   7   4  15    3.41    2.96
  -8   4 -15   28.27   13.36
   8  -4 -15   40.50    6.37
  -8  -4 -15   36.30    7.90
  -8   4  15   41.98    8.46
   8   4  15   42.75    8.33
   0   4 -16   38.32    9.15
   0  -4 -16   26.64    5.47
   0   4  16   27.24    5.34
   1   4 -16   62.10   13.47
  -1   4 -16   65.61   10.59
   1  -4 -16   52.42    8.95
  -1  -4 -16   52.39    7.43
  -1   4  16   63.96    8.90
   1   4  16   71.60   10.27
   2   4 -16    3.74    4.52
  -2   4 -16    4.54    3.53
   2  -4 -16    1.65    2.19
  -2  -4 -16    2.60    2.50
  -2   4  16    2.72    4.26
   2   4  16    2.38    3.41
   0   5   0    0.55    1.35
   0   5   0    0.48    1.28
   0   5   0    2.06    1.94
   1   5   0    1.06    1.82
   1   5   0    0.71    0.85
   1   5   0    1.08    1.29
  -1   5   0    1.84    2.18
  -2   5   0    2.20    1.00
   2   5   0    3.96    3.29
   2   5   0    1.06    1.15
  -2   5   0    2.61    1.67
  -3   5   0    0.40    0.71
   3   5   0    0.23    1.24
   3   5   0    1.13    1.46
  -3   5   0    0.15    1.58
  -4   5   0  994.77   23.68
   4   5   0  951.36   25.69
   4   5   0  925.57   24.09
  -4   5   0 1000.98   27.14
   5   5   0   -0.66    2.09
   5   5   0   -0.10    1.30
  -5   5   0    0.00    1.85
   6   5   0    6.95    2.90
   6  -5   0    3.72    0.67
   6   5   0    5.39    2.89
  -6   5   0    7.51    2.96
   7   5   0    1.43    1.79
   7   5   0   -0.15    1.12
  -7   5   0    0.63    1.90
   8   5   0   54.70   13.47
   8   5   0   52.31    4.48
   8  -5   0   52.83    3.85
  -8   5   0   60.18    7.25
   9   5   0    0.14    2.92
   9   5   0    0.67    1.63
   9  -5   0    3.62    2.71
  -9   5   0    1.54    1.69
  10   5   0  139.01   16.37
  10   5   0  117.46    7.15
  10  -5   0  144.24    8.60
 -10   5   0  156.49   17.90
  11   5   0    4.95    3.58
  11   5   0    1.92    2.83
  11  -5   0    0.64    2.05
 -11   5   0    1.29    1.68
  12   5   0   22.66    7.29
  12   5   0   14.13    3.44
  12  -5   0   19.37    6.02
 -12   5   0   14.21    7.40
  13   5   0    2.99    2.50
  13   5   0    2.15    3.04
  13  -5   0    1.71    2.84
 -13   5   0    1.23    2.98
  14   5   0  302.12   23.83
  14   5   0  291.54   13.56
  14  -5   0  295.71   14.22
 -14   5   0  259.46   15.31
  15   5   0    1.63    2.08
  15   5   0    2.11    3.41
  15  -5   0    1.91    3.07
 -15   5   0   -0.39    1.98
  16   5   0   29.39   10.45
  16   5   0   22.00    8.27
  16  -5   0   22.62   12.46
  17   5   0    5.55    3.39
  17   5   0    3.29    3.14
  17  -5   0    3.43    3.19
  18   5   0  259.58   18.51
  18   5   0  249.22   15.20
  18  -5   0  275.38   16.95
  19   5   0    5.16    4.88
  19  -5   0    1.89    2.66
  20   5   0   20.88   11.17
  20   5   0   21.04    7.22
  21   5   0    2.83    2.69
  21  -5   0    2.21    3.05
   0   5   1  876.60   22.53
   0   5  -1  756.80   20.62
   0   5   1  724.43   18.57
   0   5   1  749.97   20.71
  -1   5   1    0.23    1.21
   1   5   1   -0.19    1.36
  -1   5  -1   -0.22    1.54
   1   5  -1    0.41    1.43
   1   5  -1    1.19    1.33
   1   5   1    0.21    1.38
   1   5   1    0.72    1.14
  -1   5   1    0.34    1.06
   2   5   1  189.39   10.53
  -2   5  -1  191.92    7.63
   2   5  -1  176.21    9.65
   2   5  -1  185.26    6.82
   2   5   1  183.13    8.60
   2   5   1  190.88    7.52
  -2   5   1  163.18    7.73
   3   5   1  310.55   11.69
  -3   5  -1  326.81   11.27
   3   5  -1  304.51   14.57
   3  -5  -1  320.27    9.08
   3   5  -1  287.22   10.01
   3   5   1  301.21    9.70
   3   5   1  330.80   11.84
  -3   5   1  284.99   13.44
   4   5   1    0.91    1.19
  -4   5  -1    1.37    1.54
   4   5  -1    0.96    2.29
   4  -5  -1    1.73    1.48
   4   5   1    2.08    2.57
   4   5  -1    2.06    1.72
   4   5   1    1.00    1.32
  -4   5   1    0.64    1.33
   5   5   1  277.58   15.37
  -5   5  -1  282.64   11.45
   5   5  -1  323.29   17.62
   5  -5  -1  266.24   10.31
   5   5   1  305.25   14.57
   5   5  -1  282.74   12.17
  -5   5   1  317.47   16.57
   6   5   1  495.18   21.11
  -6   5  -1  508.01   19.08
   6   5  -1  528.13   24.91
   6  -5  -1  499.17   18.28
   6   5   1  522.85   23.45
   6   5  -1  515.75   21.42
  -6   5   1  503.18   23.17
   7   5   1  439.31   15.46
   7   5  -1  472.63   15.98
   7   5   1  453.37   17.42
   7   5  -1  408.16   12.85
   7  -5   1  483.53   12.58
  -7   5   1  452.86   16.01
   8   5   1   25.50    8.86
   8   5  -1   25.44    9.45
   8   5   1   16.77    7.55
   8   5  -1   20.29    2.97
   8  -5   1   20.92    8.06
  -8   5   1   22.06    7.89
   9   5   1  131.47   16.79
   9   5  -1  131.60   14.80
   9   5   1  119.97    7.53
   9   5  -1  125.85    7.96
   9  -5   1  153.64    8.18
  -9   5   1  143.49    9.63
  10   5   1  113.08   14.24
  10   5  -1  113.90   16.59
  10   5   1  105.04    7.52
  10   5  -1  107.40    7.11
  10  -5   1  124.68    6.86
  10  -5  -1  124.85    8.78
 -10   5   1  119.32   14.24
  11   5   1  190.09   18.22
  11   5  -1  191.13   22.43
  11   5   1  180.20   12.42
  11   5  -1  179.02   11.54
  11  -5   1  196.11   11.71
  11  -5  -1  197.30   12.73
 -11   5   1  205.09   14.30
  12   5   1  581.16   28.07
  12   5  -1  598.28   31.01
  12   5   1  567.63   24.18
  12   5  -1  551.54   23.15
  12  -5   1  594.67   23.81
  12  -5  -1  665.21   26.20
 -12   5   1  625.62   28.88
  13   5   1  119.43   14.55
  13   5  -1  119.35   15.25
  13   5   1  106.44    8.84
  13   5  -1  117.37    8.56
  13  -5   1  117.28    8.56
  13  -5  -1  128.69   12.08
 -13   5   1  119.25   11.91
  14   5   1   40.57   12.74
  14   5  -1   40.42   14.11
  14   5   1   36.76    5.67
  14   5  -1   31.04    4.53
  14  -5   1   39.49    4.70
  14  -5  -1   37.61    7.46
 -14   5   1   35.65   13.69
  15   5   1   13.21    6.96
  15   5  -1   20.43    7.96
  15   5   1   13.23    6.24
  15   5  -1   19.91    4.86
  15  -5   1   14.67    3.08
  15  -5  -1   19.42    4.19
 -15   5   1   18.19   11.59
  16   5   1  272.62   20.70
  16   5  -1  264.47   18.75
  16   5   1  277.64   19.49
  16   5  -1  274.86   18.87
  16  -5   1  252.89   16.79
  16  -5  -1  267.33   17.05
 -16   5   1  294.07   21.55
  17   5   1    1.16    3.20
  17   5  -1    3.79    3.06
  17   5   1    4.35    4.51
  17   5  -1    2.23    3.30
  17  -5   1    1.71    2.57
  17  -5  -1    2.92    3.62
 -17   5   1    1.69    2.80
  18   5  -1  171.60   20.35
  18   5   1  195.25   13.50
  18   5  -1  173.60   12.54
  18  -5   1  190.22   11.23
  18  -5  -1  193.16   12.27
 -18   5   1  189.10   12.90
  19   5  -1   74.77   18.94
  19   5   1   89.97   10.83
  19   5  -1   77.13    9.77
  19  -5   1   87.33    8.64
  19  -5  -1   82.99    8.60
  20   5  -1   28.22   15.24
 -20  -5  -1   30.91    6.67
  20   5   1   28.29   19.18
  20   5  -1   31.35    6.17
  20  -5   1   34.30    5.95
  20  -5  -1   30.01    8.23
  21   5  -1   16.11    9.46
 -21  -5  -1   13.73    8.98
  21   5   1   11.59    7.95
  21   5  -1   11.39    4.49
  21  -5   1   10.73    8.65
  21  -5  -1   14.03    4.01
   0   5  -2    0.63    1.12
   0  -5  -2    1.15    1.94
   0   5   2    0.97    0.92
   0   5   2    1.80    1.76
   1   5  -2   76.20    9.32
  -1   5  -2   76.52    4.32
   1  -5  -2   82.15    4.34
  -1  -5  -2   83.64    5.52
   1   5  -2   81.19    4.31
   1   5   2   81.57    5.36
   1   5   2   73.97    9.28
  -1   5   2   69.15   10.31
   2   5  -2   61.27    6.72
  -2   5  -2   57.77    3.48
   2  -5  -2   68.16    6.00
   2   5  -2   67.05    5.68
   2   5   2   65.70    4.92
   2   5   2   59.70    3.81
  -2   5   2   64.70    9.29
   3   5  -2  235.59   12.00
  -3   5  -2  222.67    9.20
   3  -5  -2  241.99    7.14
   3   5  -2  224.98    6.95
   3   5   2  231.44   11.01
   3   5   2  231.58    8.46
  -3   5   2  216.74    9.64
   4   5  -2  341.06   18.75
  -4   5  -2  322.01   13.79
   4  -5  -2  357.98   14.28
   4   5   2  343.67   15.07
   4   5  -2  334.29   14.27
   4   5   2  324.89   13.70
  -4   5   2  375.73   18.90
   5   5   2   56.16    7.76
   5   5  -2   51.01   12.14
  -5   5  -2   48.88    4.52
   5  -5  -2   50.72    3.28
   5   5   2   52.01    7.53
   5   5  -2   50.64    6.69
   5  -5   2   48.92    3.53
   5   5   2   48.53    3.57
  -5   5   2   46.31    5.44
   6   5   2  116.54    9.78
   6   5  -2  131.80    9.48
  -6   5  -2  117.19    5.87
   6  -5  -2  118.76    4.71
   6   5   2  128.02   11.23
   6   5  -2  126.63    7.51
   6  -5   2  126.18    6.49
   6   5   2  126.33    5.92
  -6   5   2  145.73   14.21
   7   5   2  267.42   20.99
   7   5  -2  259.70   13.25
  -7   5  -2  231.66    6.79
   7   5   2  260.34   10.89
   7   5  -2  246.05    8.66
  -7   5   2  277.76   14.92
   8   5   2  441.08   15.90
   8   5  -2  426.60   23.62
   8   5   2  406.39   13.22
   8   5  -2  413.03   11.89
   8  -5   2  471.30   12.37
  -8   5   2  450.58   15.72
   9   5   2   46.45    6.70
   9   5  -2   49.84   12.64
   9   5   2   42.52    5.34
   9   5  -2   42.29    3.96
   9  -5   2   46.27    7.05
  -9   5   2   47.98    9.05
  10   5   2  507.72   25.74
  10   5  -2  537.60   30.36
  10   5   2  489.22   21.72
  10   5  -2  482.31   20.12
  10  -5   2  511.83   21.91
 -10   5   2  493.26   25.13
  11   5   2  898.86   49.86
  11   5  -2  983.63   20.09
  11   5   2  855.73   44.45
  11   5  -2  851.31   43.63
  11  -5   2  929.15   12.98
  11  -5  -2  965.45   17.31
 -11   5   2  871.36   49.76
  12   5  -2   48.86   18.60
  12   5   2   41.17    6.30
  12   5  -2   39.41    8.70
  12  -5   2   42.28    6.99
  12  -5  -2   48.18    7.57
 -12   5   2   44.10   14.98
  13   5  -2   63.65   11.01
  13   5   2   64.63    7.25
  13   5  -2   57.28    6.08
  13  -5   2   62.51    5.71
  13  -5  -2   68.93    6.78
 -13   5   2   67.73    9.00
  14   5  -2   66.40   19.86
  14   5   2   55.13    6.24
  14   5  -2   60.88    6.53
  14  -5   2   62.63    5.62
  14  -5  -2   63.37    6.38
 -14   5   2   63.54   17.73
  15   5  -2   66.05   17.97
 -15  -5  -2   62.01   10.36
  15   5   2   63.49    7.95
  15   5  -2   63.20    6.41
  15  -5   2   61.37    6.01
  15  -5  -2   73.03    8.14
 -15   5   2   73.59   17.19
  16   5  -2  122.13   21.34
 -16  -5  -2  138.55   12.38
  16   5   2  122.65   11.62
  16   5  -2  126.02   10.69
  16  -5   2  128.34    9.91
  16  -5  -2  140.27   11.50
 -16   5   2  128.01   14.49
  17   5  -2    2.86    3.73
 -17  -5  -2    2.18    2.55
  17   5   2    1.15    2.46
  17   5  -2    2.30    3.25
  17  -5   2    1.80    1.75
  17  -5  -2    2.71    4.21
 -17   5   2    3.23    3.13
  18   5  -2   50.67   16.12
 -18  -5  -2   49.67    7.21
  18   5   2   40.50    7.67
  18   5  -2   47.98    7.66
  18  -5   2   48.87    5.64
  18  -5  -2   50.02    6.44
 -18   5   2   41.81   10.06
  19   5  -2  179.50   15.74
 -19  -5  -2  167.71   14.47
  19   5   2  153.50   13.68
  19   5  -2  138.54   13.75
  19  -5   2  181.97   13.37
  19  -5  -2  184.46   15.37
 -19   5   2  156.32   13.80
  20   5  -2   20.88    9.43
 -20  -5  -2   20.35    5.68
  20   5   2   16.94    4.83
  20   5  -2   14.70    4.74
  20  -5   2   27.79    6.21
  20  -5  -2    9.39    7.07
 -20   5   2   10.48    8.58
  21   5  -2   11.77   10.01
 -21  -5  -2   20.78    5.72
  21   5   2   11.60    9.96
  21   5  -2    7.00    5.62
  21  -5   2    9.52    5.58
  21  -5  -2    9.93    3.55
 -21   5   2    8.02   10.21
   0   5  -3  561.51   23.05
   0  -5  -3  586.22   22.98
   0   5   3  504.86   20.59
   0   5   3  545.39   22.62
   1   5  -3    4.54    2.87
  -1   5  -3    3.26    1.39
   1  -5  -3    3.14    1.80
  -1  -5  -3    2.58    1.56
  -1   5   3    3.13    2.00
   1   5   3    2.79    1.67
  -1   5   3    3.45    2.44
   1   5   3    1.89    1.55
   2   5  -3   76.65    8.13
  -2   5  -3   74.13    7.46
  -2  -5  -3   76.82    5.27
   2   5  -3   65.94    3.79
   2   5   3   70.30    6.05
  -2   5   3   76.39   10.58
   2   5   3   73.15   10.39
   3   5  -3   64.00   16.79
  -3   5  -3   66.12    9.80
   3  -5  -3   63.48    7.96
  -3  -5  -3   56.21    4.94
   3   5   3   55.92    5.39
   3  -5   3   52.61    3.16
  -3   5   3   49.34    6.47
   3   5   3   58.35    4.39
   4   5  -3   33.69   11.27
  -4   5  -3   36.81    3.44
   4  -5  -3   40.89    2.38
  -4  -5  -3   39.71    3.68
   4   5   3   41.08    5.21
   4   5  -3   35.67    3.84
   4  -5   3   36.62    2.77
  -4   5   3   42.68   11.60
   4   5   3   36.31    6.24
   5   5  -3  128.69   11.58
  -5   5  -3  139.11    7.16
   5  -5  -3  143.40    6.00
  -5  -5  -3  150.20    8.55
   5   5   3  144.39   12.32
   5   5  -3  132.96    6.76
   5  -5   3  141.96    6.64
  -5   5   3  133.84    9.51
   5   5   3  147.44    7.30
   6   5  -3    5.69    2.88
  -6   5  -3    2.92    1.22
   6  -5  -3    2.85    0.61
  -6  -5  -3    6.12    2.69
   6   5   3    4.20    2.42
   6   5  -3    4.69    3.02
   6  -5   3    2.80    1.09
   6   5   3    5.24    2.10
  -6   5   3    7.60    3.59
   7   5  -3    1.42    2.23
  -7  -5  -3    0.87    1.12
   7   5   3    0.97    1.83
   7   5  -3    1.46    1.70
  -7   5   3    2.10    2.45
   8   5  -3   49.84    8.31
  -8  -5  -3   38.88    4.45
   8   5   3   44.57    6.27
   8   5  -3   46.75    3.75
   8  -5   3   49.19    3.51
  -8   5   3   46.61   10.32
   9   5  -3 1161.42   47.07
  -9  -5  -3 1092.17   42.83
   9   5   3 1106.21   46.99
   9   5  -3 1069.34   40.74
   9  -5   3 1209.38   46.26
  -9   5   3 1149.98   48.54
  10   5  -3    2.86    3.98
 -10  -5  -3    3.25    3.83
  10   5   3    2.51    3.22
  10   5  -3    3.13    1.74
  10  -5   3    2.50    2.09
 -10   5   3    2.66    3.26
  11   5  -3    5.43    4.27
 -11  -5  -3    4.04    2.50
  11   5   3    2.88    1.79
  11   5  -3    3.93    2.29
  11  -5   3    4.87    2.15
 -11   5   3    6.17    3.61
  12   5  -3   79.42   19.61
 -12  -5  -3   71.32   11.45
  12   5   3   78.85    7.11
  12   5  -3   71.48    5.27
  12  -5   3   79.30    5.42
  12  -5  -3   89.61    8.12
 -12   5   3   73.57   16.26
  13   5  -3   30.74   11.45
 -13  -5  -3   23.37    4.53
  13   5   3   25.36    4.55
  13   5  -3   23.80    4.30
  13  -5   3   25.62    3.25
  13  -5  -3   27.16    4.70
 -13   5   3   26.81    8.56
  14   5  -3  264.67   17.98
 -14  -5  -3  251.69   14.17
  14   5   3  231.50   13.17
  14   5  -3  253.20   12.21
  14  -5   3  280.15   11.98
  14  -5  -3  290.01   13.30
 -14   5   3  251.73   13.56
  15   5  -3  145.64   21.14
 -15  -5  -3  153.11   13.02
  15   5   3  140.52   10.80
  15   5  -3  139.13   10.70
  15  -5   3  148.13    9.06
  15  -5  -3  153.66    9.77
 -15   5   3  136.75   11.15
  16   5  -3   17.17    7.20
 -16  -5  -3   14.03    4.19
  16   5   3   11.66    3.66
  16   5  -3   10.67    4.70
  16  -5   3   21.46    3.67
  16  -5  -3   11.70    6.68
 -16   5   3   12.71    6.04
  17   5  -3   30.09    9.21
 -17  -5  -3   26.58    5.70
  17   5   3   27.60    6.05
  17   5  -3   19.42   11.51
  17  -5   3   24.76    9.19
  17  -5  -3   27.08    6.87
 -17   5   3   27.96    9.14
  18   5  -3  114.17   18.45
 -18  -5  -3  129.47   10.59
  18   5   3  114.36   10.75
  18  -5   3  110.09    8.03
  18  -5  -3  110.27    9.44
 -18   5   3  126.78    9.65
  19   5  -3   72.79   14.48
 -19  -5  -3   74.10    8.84
  19   5   3   74.73    9.44
  19   5  -3   45.22   21.79
  19  -5   3   72.52    7.58
  19  -5  -3   81.77    8.83
 -19   5   3   78.44   20.70
  20   5  -3    6.16    3.24
 -20  -5  -3    9.00    5.16
  20   5   3    9.11    7.37
  20  -5   3    4.03    3.22
  20  -5  -3    7.97    5.33
 -20   5   3    6.90    7.06
 -21  -5  -3   34.22    6.67
  21   5   3   19.01   16.68
  21   5  -3   13.99   11.84
  21  -5  -3   29.55    9.01
   0   5  -4    1.19    2.12
   0  -5  -4    0.26    1.13
   0   5   4   -1.06    1.61
   0  -5   4    0.14    0.18
   0   5   4    0.02    1.49
   1   5  -4  310.32   14.18
  -1   5  -4  305.24   13.68
   1  -5  -4  304.06   12.77
  -1  -5  -4  306.61   13.34
  -1   5   4  286.97   13.31
   1   5   4  301.41   14.10
   1  -5   4  237.66    8.99
  -1  -5   4  231.92    8.78
   1  -5   4  251.33    9.45
  -1   5   4  285.08   14.16
   1   5   4  295.88   15.50
   2   5  -4   49.21   10.66
  -2   5  -4   46.84    4.12
   2  -5  -4   47.47    3.17
  -2  -5  -4   44.31    3.99
   2   5   4   44.21    8.61
   2  -5   4   36.97    2.21
  -2   5   4   44.39    7.84
   2   5   4   46.72    6.68
   3   5  -4    1.49    2.98
  -3   5  -4    1.27    1.91
   3  -5  -4    2.30    1.82
  -3  -5  -4   -0.14    1.51
   3   5  -4    0.67    0.61
   3   5   4    2.61    2.44
   3  -5   4    1.12    0.81
  -3   5   4    1.44    2.91
   3   5   4    0.36    1.69
   4   5  -4  592.85   18.16
  -4   5  -4  600.34   15.64
   4  -5  -4  587.17   13.34
  -4  -5  -4  635.01   17.18
   4   5  -4  538.70   12.22
   4   5   4  575.59   18.57
  -4   5   4  586.86   18.89
   4   5   4  586.62   16.99
   5   5  -4    0.64    2.69
  -5   5  -4    0.69    1.09
   5  -5  -4    1.53    1.23
  -5  -5  -4    0.71    1.84
   5   5  -4    0.65    0.83
   5  -5   4    1.20    1.28
  -5   5   4    1.34    1.90
   5   5   4    1.11    2.32
   6   5  -4   26.67    7.09
  -6   5  -4   21.13    6.14
   6  -5  -4   22.68    1.53
  -6  -5  -4   31.85    6.91
   6   5   4   32.66   10.36
   6   5  -4   17.26    5.30
   6  -5   4   17.86    4.72
  -6   5   4   28.75   13.87
   6   5   4   26.13    4.38
   7   5  -4   23.31    5.90
  -7   5  -4   19.76    2.35
   7  -5  -4   16.21    2.48
  -7  -5  -4   22.67    7.03
   7   5   4   24.68    9.02
   7   5  -4   18.60    2.29
   7  -5   4   17.45    2.10
  -7   5   4   28.25    7.43
   7   5   4   15.26    4.33
   8   5  -4   27.25    9.33
  -8   5  -4   24.54    2.46
  -8  -5  -4   21.77    4.72
   8   5   4   27.00    9.12
   8   5  -4   23.82    2.83
   8  -5   4   19.35    5.66
  -8   5   4   28.97    9.79
   8   5   4   19.01    3.84
   9   5  -4   39.93   13.32
  -9  -5  -4   34.60    5.17
   9   5   4   37.87   12.34
   9   5  -4   35.45    8.26
  -9   5   4   43.48    9.79
  10   5  -4    2.47    2.60
 -10  -5  -4    3.75    2.47
  10   5   4    3.31    2.46
  10   5  -4    2.75    2.20
  10  -5   4    2.74    2.23
 -10   5   4    2.42    2.71
  11   5  -4    3.31    2.72
  11   5   4    0.43    1.76
  11   5  -4    2.30    2.31
  11  -5   4    0.90    1.21
 -11   5   4    1.74    3.48
  12   5  -4  145.25   19.09
 -12  -5  -4  119.92    9.52
  12   5   4  131.07    9.76
  12   5  -4  129.93    8.42
  12  -5   4  149.05    9.83
  12  -5  -4  152.73   10.87
 -12   5   4  115.78   13.77
  13   5  -4   37.40   14.72
 -13  -5  -4   29.36    9.47
  13   5   4   34.96    6.17
  13   5  -4   25.37   12.43
  13  -5   4   30.23    7.32
  13  -5  -4   29.23    4.59
 -13   5   4   36.09   13.73
  14   5  -4   62.24   19.83
 -14  -5  -4   57.29   11.19
  14   5   4   65.82    7.71
  14   5  -4   48.48   12.85
  14  -5   4   55.25    5.47
  14  -5  -4   74.06   15.97
 -14   5   4   58.47   17.51
  15   5  -4  204.02   16.55
 -15  -5  -4  150.90   12.80
  15   5   4  193.68   14.99
  15   5  -4  186.86   13.31
  15  -5   4  189.40   12.89
  15  -5  -4  208.59   14.24
 -15   5   4  165.99   13.56
  16   5  -4   13.69    5.14
 -16  -5  -4    8.31    3.72
  16   5   4    9.58    5.35
  16   5  -4    9.79    3.86
  16  -5  -4   14.01    4.29
 -16   5   4   14.01    6.43
  17   5  -4   66.72   17.19
 -17  -5  -4   71.89    8.83
  17   5   4   61.52    8.87
  17   5  -4   61.03    7.47
  17  -5   4   68.94    6.51
  17  -5  -4   72.58    7.55
 -17   5   4   59.46   10.61
  18   5  -4    6.06    4.46
 -18  -5  -4    7.58    3.45
  18   5   4    4.23    3.27
  18   5  -4    2.98    2.91
  18  -5   4    5.88    2.41
  18  -5  -4    6.02    2.84
 -18   5   4    5.32    3.90
  19   5  -4   19.03    7.31
 -19  -5  -4   16.53    5.26
  19   5   4   15.61    5.52
  19   5  -4   12.38    4.49
  19  -5   4   11.76    3.20
  19  -5  -4   11.13    6.89
 -19   5   4   11.86    7.25
  20   5  -4    3.84    3.93
 -20  -5  -4    7.23    3.64
  20   5   4    3.57    4.42
  20   5  -4    3.71    4.25
  20  -5   4    1.16    2.21
 -20   5   4    5.25    3.03
   0   5  -5    4.85    2.63
   0  -5  -5    4.16    1.69
   0   5   5    3.07    2.19
   0   5   5    2.34    1.79
   1   5  -5   27.37    8.21
  -1   5  -5   21.05    3.09
   1  -5  -5   21.83    4.79
  -1  -5  -5   20.40    2.47
  -1   5   5   25.82    8.05
   1   5   5   28.49    8.61
  -1   5   5   30.02    5.63
   1   5   5   28.99    7.83
   2   5  -5  994.22   24.99
  -2   5  -5  994.78   23.84
   2  -5  -5 1016.10   10.86
  -2  -5  -5 1015.60   13.17
   2   5   5  964.47   26.27
  -2   5   5 1062.38   19.58
   2   5   5  998.91   28.89
   3   5  -5  215.64    9.32
  -3   5  -5  204.24    7.76
   3  -5  -5  210.97    6.46
  -3  -5  -5  219.57    9.37
   3   5   5  213.27   10.09
  -3   5   5  223.70   11.38
   3   5   5  204.40    8.36
   4   5  -5  204.08   10.04
   4  -5  -5  207.89    6.20
  -4  -5  -5  195.86    8.13
   4   5  -5  175.36    4.48
   4   5   5  203.00    8.71
   4  -5   5  182.04    4.51
  -4   5   5  212.84    9.61
   4   5   5  204.36    8.32
   5   5  -5  114.71   13.12
  -5   5  -5  117.04    6.04
   5  -5  -5  117.37    4.78
  -5  -5  -5  117.56    7.77
   5   5   5  110.38    7.62
   5   5  -5  102.71    3.45
   5  -5   5  111.49    3.64
  -5   5   5  115.18   11.46
   5   5   5  112.51    5.49
   6   5  -5   53.95   12.71
   6  -5  -5   46.62    2.26
  -6  -5  -5   50.90    7.32
   6   5   5   57.46   15.31
   6   5  -5   42.46    3.42
   6  -5   5   43.14    3.47
  -6   5   5   50.81    7.96
   6   5   5   48.50    6.04
   7   5  -5  885.05   38.64
  -7   5  -5  868.65   33.14
   7  -5  -5  964.54   35.23
  -7  -5  -5  832.02   33.35
   7   5   5  875.38   35.47
   7   5  -5  758.51   28.88
   7  -5   5  801.24   29.92
  -7   5   5  795.30   34.04
   7   5   5  800.00   31.78
   8   5  -5  178.16   13.44
  -8   5  -5  169.63    9.80
  -8  -5  -5  164.87   11.11
   8   5   5  178.31   12.34
   8   5  -5  169.09    9.60
   8  -5   5  166.56    9.35
  -8   5   5  163.13   12.77
   8   5   5  174.77   13.08
   9   5  -5   44.48   13.90
  -9  -5  -5   35.03    8.59
   9   5   5   40.43   13.63
   9   5  -5   34.06    4.63
   9  -5   5   35.00    4.55
  -9   5   5   44.01   10.34
  10   5  -5   35.07   10.89
 -10  -5  -5   28.27    6.19
  10   5   5   37.18   12.62
  10   5  -5   32.53    3.23
  10  -5   5   25.17    4.86
 -10   5   5   40.00   10.57
  11   5  -5  252.63   17.73
  11   5   5  224.03   24.53
  11   5  -5  240.12   12.78
  11  -5   5  260.25   13.60
 -11   5   5  241.13   15.60
  12   5  -5    1.60    2.05
 -12  -5  -5    3.98    4.15
  12   5   5    2.53    2.83
  12   5  -5    1.87    1.86
 -12   5   5    5.11    3.06
  13   5  -5    3.78    3.24
 -13  -5  -5    2.59    4.28
  13   5   5    1.43    4.21
  13   5  -5    1.08    2.11
  13  -5   5    1.24    1.74
  13  -5  -5    2.31    3.55
 -13   5   5    2.26    3.02
  14   5  -5   54.93   17.60
 -14  -5  -5   52.30   13.95
  14   5   5   57.48    6.68
  14   5  -5   44.76   10.10
  14  -5   5   45.70   12.96
  14  -5  -5   66.30    6.18
 -14   5   5   56.40   17.42
  15   5  -5  244.29   23.96
 -15  -5  -5  215.25   18.95
  15   5   5  262.60   18.63
  15   5  -5  222.85   15.02
  15  -5   5  245.47   15.45
  15  -5  -5  264.20   20.30
 -15   5   5  151.26   14.41
  16   5  -5  241.50   16.10
 -16  -5  -5  230.13   14.38
  16   5   5  250.80   16.16
  16   5  -5  211.83   12.79
  16  -5   5  203.03   10.80
  16  -5  -5  255.36   14.37
  17   5  -5   94.87   27.87
 -17  -5  -5   89.87    8.11
  17   5   5  100.57   10.20
  17   5  -5   74.52    7.51
  17  -5   5   92.37    6.75
  17  -5  -5   88.67    7.65
 -17   5   5   90.48   16.73
  18   5  -5   13.20    5.92
 -18  -5  -5    6.98    3.31
  18   5   5   12.61    5.24
  18   5  -5    6.17    3.39
  18  -5   5    5.43    2.93
  18  -5  -5   10.28    3.67
 -18   5   5   10.97    4.18
  19   5  -5   42.68   18.11
 -19  -5  -5   41.55    7.67
  19   5   5   31.14   23.85
  19   5  -5   31.40    6.04
  19  -5   5   37.88   10.31
  19  -5  -5   48.29    9.16
 -19   5   5   41.07   19.22
  20   5  -5   82.83   28.26
 -20  -5  -5   78.60   16.44
  20   5   5   79.02   12.08
  20  -5   5   71.38   11.39
  20  -5  -5  101.33   12.85
 -20   5   5   83.70   16.25
   0   5  -6    1.23    1.57
   0  -5  -6    1.20    1.58
   0   5   6    1.61    2.15
   0   5   6    1.00    1.70
   1   5  -6    6.13    3.55
  -1   5  -6    6.67    2.70
   1  -5  -6    7.42    2.86
  -1  -5  -6    8.19    2.25
  -1   5   6    7.14    2.85
   1   5   6    7.54    3.17
  -1   5   6    9.17    4.23
   1   5   6    7.80    3.50
   2   5  -6   17.26    4.17
  -2   5  -6   19.08    3.23
   2  -5  -6   17.83    2.32
  -2  -5  -6   15.39    2.49
   2   5   6   21.34    6.08
  -2   5   6   25.92    7.81
   2   5   6   17.32    8.09
   3   5  -6   76.92    6.42
  -3   5  -6   81.17    6.52
   3  -5  -6   80.02    4.60
  -3  -5  -6   79.46    5.12
   3   5   6   81.24    9.47
  -3   5   6   86.12   12.87
   3   5   6   77.84    6.69
   4   5  -6  114.48    8.17
  -4   5  -6  127.25    8.31
   4  -5  -6  117.30    6.06
  -4  -5  -6  112.10    7.49
   4   5   6  115.15   12.65
  -4   5   6  121.45    8.11
   4   5   6  127.38    7.49
   5   5  -6  946.94   37.82
  -5   5  -6  954.92   36.53
   5  -5  -6  938.84   34.76
  -5  -5  -6  936.43   36.66
   5   5   6  878.55   37.37
  -5   5   6 1011.76   41.58
   5   5   6  910.21   34.92
   6   5  -6  225.92   16.87
  -6   5  -6  221.71   12.74
   6  -5  -6  227.99   12.07
  -6  -5  -6  224.31   13.90
   6   5   6  227.65   12.05
  -6   5   6  240.40   16.32
   6   5   6  223.07   12.83
   7   5  -6   67.75   18.30
  -7   5  -6   57.44    6.80
   7  -5  -6   67.04    3.10
  -7  -5  -6   65.59    6.15
   7   5   6   64.50    7.31
  -7   5   6   68.01    9.80
   7   5   6   58.62    6.48
   8   5  -6   70.93   13.25
  -8   5  -6   63.53    4.94
  -8  -5  -6   65.73    6.17
   8   5   6   68.46    9.35
  -8   5   6   65.88    5.95
   8   5   6   56.11    7.45
   9   5  -6   11.40    4.43
  -9   5  -6    7.32    1.87
  -9  -5  -6    6.97    2.85
   9   5   6   10.08    2.67
   9  -5   6    9.13    1.68
  -9   5   6    8.93    3.66
  10   5  -6   63.28   18.33
 -10   5  -6   56.06    4.64
 -10  -5  -6   55.59   12.99
  10   5   6   62.29    9.31
  10   5  -6   52.58    6.54
  10  -5   6   56.27    4.25
 -10   5   6   65.38   19.05
  11   5  -6   17.77    5.83
 -11  -5  -6   13.96    7.04
  11   5   6   14.70    4.81
  11   5  -6   11.40    4.68
  11  -5   6    9.72    2.10
 -11   5   6   15.50    5.30
  12   5  -6    1.78    3.88
 -12  -5  -6    6.95    3.79
  12   5   6    2.57    1.58
  12   5  -6    2.98    1.55
  12  -5   6    1.71    1.84
 -12   5   6    4.54    3.75
  13   5  -6  270.81   17.31
 -13  -5  -6  265.24   14.53
  13   5   6  275.83   16.76
  13   5  -6  227.37   11.38
  13  -5   6  256.17   12.37
 -13   5   6  274.14   17.36
  14   5  -6  138.75   34.39
 -14  -5  -6  112.27   11.43
  14   5   6  121.69   12.56
  14   5  -6  110.11    8.53
  14  -5   6  127.86    9.29
  14  -5  -6  146.40   11.51
 -14   5   6  131.62   13.46
  15   5  -6   18.21    8.14
 -15  -5  -6   14.80    4.14
  15   5   6   14.73    7.48
  15   5  -6   16.43    3.88
  15  -5   6   13.16    2.86
  15  -5  -6   22.60    8.90
 -15   5   6   17.87    6.26
  16   5  -6   56.34   16.36
 -16  -5  -6   51.52   10.00
  16   5   6   46.08    6.34
  16  -5   6   45.71    8.20
  16  -5  -6   65.37   13.49
 -16   5   6   51.86   19.24
  17   5  -6   11.47    6.94
 -17  -5  -6    9.47    8.72
  17   5   6   16.64    5.14
  17  -5   6    8.13    3.62
  17  -5  -6   15.23    5.05
 -17   5   6   13.71    4.97
  18   5  -6   13.95    5.69
 -18  -5  -6   18.31    5.03
  18   5   6   23.40    6.67
  18  -5   6   10.00    5.73
  18  -5  -6   18.76    4.75
 -18   5   6   18.63   10.68
  19   5  -6   42.94   19.70
 -19  -5  -6   39.55    7.50
  19   5   6   43.53    8.83
  19  -5  -6   42.69   10.96
 -19   5   6   40.16   16.45
   0   5  -7  571.07   23.94
   0  -5  -7  558.76   22.03
   0   5   7  505.79   21.26
   0   5   7  562.45   23.78
   1   5  -7   69.82    5.99
  -1   5  -7   79.14    6.40
   1  -5  -7   73.48    3.87
  -1  -5  -7   80.54    5.71
  -1   5   7   71.82    9.67
   1   5   7   79.22    7.45
  -1   5   7   75.98    5.61
   1   5   7   77.45    5.38
   2   5  -7   19.45    4.39
  -2   5  -7   21.80    4.05
   2  -5  -7   20.94    2.69
  -2  -5  -7   22.01    3.50
   2   5   7   20.68    6.68
  -2   5   7   20.09    9.56
   2   5   7   18.85    3.01
   3   5  -7  196.46   17.31
  -3   5  -7  197.72   10.80
   3  -5  -7  197.02    8.93
  -3  -5  -7  197.76   10.10
   3   5   7  189.57   11.03
  -3   5   7  185.74   11.15
   3   5   7  197.35   10.69
   4   5  -7   32.46    8.46
  -4   5  -7   28.41    3.86
   4  -5  -7   35.62    2.97
  -4  -5  -7   32.29    3.61
   4   5   7   36.63    5.75
  -4   5   7   38.55    8.03
   4   5   7   36.20    4.50
   5   5  -7  146.40   19.93
  -5   5  -7  150.27   10.05
   5  -5  -7  144.57    8.57
  -5  -5  -7  149.39   10.38
   5   5   7  136.46   13.96
  -5   5   7  159.07   11.72
   5   5   7  155.23   10.05
   6   5  -7  199.56   13.15
  -6   5  -7  204.17   12.47
   6  -5  -7  186.61   10.73
  -6  -5  -7  200.84   13.54
   6   5   7  187.34   13.34
  -6   5   7  216.56   15.46
   6   5   7  211.95   12.56
   7   5  -7   88.47    7.64
  -7   5  -7   85.15    6.14
   7  -5  -7   90.50    4.77
  -7  -5  -7   88.84   10.14
   7   5   7   87.04    9.76
  -7   5   7   96.29   16.60
   7   5   7   84.32    5.34
   8   5  -7   73.48   11.72
  -8   5  -7   73.47    5.90
  -8  -5  -7   72.39    6.99
   8   5   7   70.12    8.93
  -8   5   7   75.27   11.78
   8   5   7   67.08    4.56
   9   5  -7   84.49   19.42
  -9   5  -7   78.80    6.16
  -9  -5  -7   78.80    7.57
   9   5   7   74.39   15.52
  -9   5   7   77.38   13.21
  10   5  -7    0.67    1.01
 -10   5  -7    1.20    1.30
 -10  -5  -7    0.26    2.19
  10   5   7    0.94    1.59
 -10   5   7    0.88    1.38
  11   5  -7   54.22   14.93
 -11  -5  -7   48.92   13.79
  11   5   7   46.58   11.86
 -11   5   7   48.03    7.41
  12   5  -7   43.25   11.92
 -12  -5  -7   31.23    4.51
  12   5   7   33.33   10.53
 -12   5   7   36.35   13.67
  13   5  -7    8.21    6.24
 -13  -5  -7    6.71    4.45
  13   5   7    6.35    3.48
 -13   5   7    7.47    5.17
  14   5  -7  122.53   20.97
 -14  -5  -7  112.79   11.81
  14   5   7  118.38   14.04
 -14   5   7  124.87   13.43
  15   5  -7   39.75    9.93
 -15  -5  -7   37.10    5.32
  15   5   7   34.28    8.78
  15  -5  -7   38.27    7.53
 -15   5   7   36.60   13.37
  16   5  -7   35.13   12.43
 -16  -5  -7   31.79    5.77
  16   5   7   29.66    9.72
  16  -5  -7   39.74    9.16
 -16   5   7   33.31   11.44
  17   5  -7   61.88   17.00
 -17  -5  -7   58.31    7.18
  17   5   7   59.75    8.91
  17  -5  -7   75.31    8.33
 -17   5   7   53.77   16.53
  18   5  -7   26.33   10.65
 -18  -5  -7   21.17    5.17
  18   5   7   21.84   11.64
  18  -5  -7   34.41    7.33
 -18   5   7   22.30   11.90
 -19  -5  -7    0.65    1.79
  19  -5  -7    4.02    4.31
   0   5  -8    2.55    2.71
   0  -5  -8    1.69    2.76
   0   5   8    1.17    1.67
   0   5   8    1.19    1.76
   1   5  -8  225.13   14.33
  -1   5  -8  231.04   14.33
   1  -5  -8  210.67   11.98
  -1  -5  -8  215.60   12.35
  -1   5   8  213.60   14.19
   1   5   8  221.55   17.68
  -1   5   8  236.10   14.89
   1   5   8  236.81   14.35
   2   5  -8  355.01   20.26
  -2   5  -8  364.26   20.16
   2  -5  -8  356.69   19.23
  -2  -5  -8  367.45   20.01
   2   5   8  341.19   19.96
  -2   5   8  358.79   20.59
   2   5   8  373.52   21.41
   3   5  -8    4.62    2.62
  -3   5  -8    3.72    2.69
   3  -5  -8    3.53    2.02
  -3  -5  -8    5.09    2.10
   3   5   8    3.23    3.39
  -3   5   8    3.17    3.40
   3   5   8    3.66    2.07
   4   5  -8    5.98    3.09
  -4   5  -8    4.45    3.36
   4  -5  -8    5.82    2.36
  -4  -5  -8    5.69    4.64
   4   5   8    5.98    3.22
  -4   5   8    7.60    3.09
   4   5   8    5.51    1.94
   5   5  -8    2.40    2.07
  -5   5  -8    0.96    1.97
   5  -5  -8    0.58    1.39
  -5  -5  -8    4.46    3.81
   5   5   8    6.39    3.02
  -5   5   8    2.02    2.87
   5   5   8    2.44    2.39
   6   5  -8   88.27   10.20
  -6   5  -8   86.66    6.96
   6  -5  -8   78.96    5.81
  -6  -5  -8   84.95    9.95
   6   5   8   83.55   12.68
  -6   5   8   85.54    9.74
   6   5   8   88.34    6.54
   7   5  -8  130.57   13.77
  -7   5  -8  119.79    8.00
   7  -5  -8  108.45    6.75
  -7  -5  -8  125.33    9.15
   7   5   8  121.24   14.81
  -7   5   8  128.79   13.93
   7   5   8  127.73    8.26
   8   5  -8    4.06    3.67
  -8   5  -8    2.89    2.08
  -8  -5  -8    4.05    3.76
   8   5   8    2.82    3.21
  -8   5   8    1.73    2.25
   8   5   8    4.32    2.40
   9   5  -8   41.38   13.07
  -9   5  -8   38.77    4.43
  -9  -5  -8   37.97    5.32
   9   5   8   37.26   13.24
  -9   5   8   38.99   11.14
   9   5   8   33.84    3.89
  10   5  -8   20.10    7.23
 -10   5  -8   19.07    3.37
 -10  -5  -8   13.99    7.05
  10   5   8   20.58    6.55
 -10   5   8   19.02    7.60
  11   5  -8   98.32   17.08
 -11  -5  -8   98.45    9.79
  11   5   8  104.56    9.83
 -11   5   8  107.31   18.42
  12   5  -8   42.71   12.98
  12   5   8   36.91   12.77
 -12   5   8   45.88    8.72
  13   5  -8    9.53    6.77
 -13  -5  -8   11.32    6.17
  13   5   8   11.14    3.85
 -13   5   8   11.25    4.94
  14   5  -8    3.32    2.66
 -14  -5  -8    3.06    3.40
  14   5   8    0.68    1.60
 -14   5   8    2.66    2.54
  15   5  -8   23.91    9.99
 -15  -5  -8   19.05   11.91
  15   5   8   21.05    8.09
  15  -5  -8   18.39    5.20
 -15   5   8   17.81    7.61
  16   5  -8    4.14    3.32
 -16  -5  -8    2.32    2.20
  16   5   8    4.46    3.65
  16  -5  -8    7.71    3.84
 -16   5   8    5.74    3.26
  17   5  -8    0.52    2.72
 -17  -5  -8    1.85    3.08
  17   5   8    0.14    2.29
  17  -5  -8    2.09    3.49
 -17   5   8    0.98    1.82
  18   5  -8    8.51    5.60
 -18  -5  -8    4.23    3.53
  18   5   8    5.59    3.52
  18  -5  -8    6.50    4.07
 -18   5   8    8.27    3.99
   0   5  -9   48.83    5.86
   0  -5  -9   54.89    4.85
   0   5   9   55.24   12.04
   0   5   9   57.03    5.74
   1   5  -9  219.69   12.29
  -1   5  -9  211.81   12.94
   1  -5  -9  211.99   10.04
  -1  -5  -9  216.15   10.55
  -1   5   9  200.63   13.17
   1   5   9  202.49   11.82
  -1   5   9  209.22   11.98
   1   5   9  230.41   11.97
   2   5  -9   91.87    8.43
  -2   5  -9   84.84    7.90
  -2  -5  -9   80.80    6.37
   2   5   9   82.49   11.30
  -2   5   9   75.32    8.71
   2   5   9   85.98    8.09
   3   5  -9  135.73    9.56
  -3   5  -9  125.03   10.41
  -3  -5  -9  139.92    8.88
   3   5   9  140.11   10.65
  -3   5   9  129.95    9.47
   3   5   9  145.90   10.02
   4   5  -9  181.18   11.96
  -4   5  -9  179.39   16.77
   4  -5  -9  194.26   10.77
  -4  -5  -9  189.33   11.46
   4   5   9  192.62   12.37
  -4   5   9  187.69   12.03
   4   5   9  194.42   11.97
   5   5  -9  154.86   10.74
  -5   5  -9  153.35   10.29
   5  -5  -9  149.16    8.29
  -5  -5  -9  182.64   11.99
   5   5   9  156.05   11.28
  -5   5   9  138.51    9.97
   5   5   9  157.92    9.95
   6   5  -9    5.64    3.14
  -6   5  -9    4.96    2.33
   6  -5  -9    8.31    1.95
  -6  -5  -9    7.53    5.19
   6   5   9    9.78    4.02
  -6   5   9    8.93    3.64
   6   5   9    7.92    2.41
   7   5  -9   48.73   12.05
  -7   5  -9   48.83    5.44
   7  -5  -9   42.75    4.29
  -7  -5  -9   51.82    9.87
   7   5   9   47.63   11.10
  -7   5   9   54.49   11.83
   7   5   9   48.53   10.17
   8   5  -9   72.80    9.32
  -8   5  -9   76.77    6.56
  -8  -5  -9   85.01    6.89
   8   5   9   75.22   17.87
  -8   5   9   81.72   14.62
   9   5  -9  205.89   18.02
  -9   5  -9  195.52   10.58
  -9  -5  -9  195.50   12.26
   9   5   9  181.22   12.00
  -9   5   9  216.82   15.40
   9   5   9  169.10    9.18
  10   5  -9  154.49   23.68
 -10   5  -9  137.37    9.61
 -10  -5  -9  151.33   12.14
  10   5   9  145.29   12.10
 -10   5   9  167.29   24.03
  11   5  -9   18.52    9.57
 -11  -5  -9   16.99    3.82
  11   5   9   20.03    6.81
 -11   5   9   19.26    7.94
  12   5  -9   49.06   14.74
 -12  -5  -9   35.78    5.67
  12   5   9   34.94   14.67
 -12   5   9   40.28   14.67
  13   5  -9   78.93   26.05
 -13  -5  -9   79.42   10.49
  13   5   9   83.06   21.07
 -13   5   9   85.15   15.30
  14   5  -9  230.56   33.00
 -14  -5  -9  229.45   17.39
  14   5   9  213.98   16.99
 -14   5   9  229.88   24.07
  15   5  -9    2.20    2.60
 -15  -5  -9    0.75    2.12
  15   5   9   -0.38    2.79
  15  -5  -9    2.38    4.21
 -15   5   9    3.17    3.51
  16   5  -9    6.72    4.88
 -16  -5  -9    3.44    3.05
  16   5   9    5.51    5.01
  16  -5  -9    4.61    2.66
 -16   5   9    5.69    5.11
  17   5  -9   87.85   24.22
 -17  -5  -9   77.85   10.12
  17   5   9   81.43   17.38
  17  -5  -9   82.44   12.38
 -17   5   9   79.14   21.57
   0   5 -10    1.39    2.03
   0  -5 -10    1.49    2.11
   0   5  10    0.78    3.15
   0   5  10    0.88    2.03
   1   5 -10   49.31    5.77
  -1   5 -10   45.02    5.64
   1  -5 -10   48.75    8.33
  -1  -5 -10   49.24    5.24
   1   5  10   47.11    8.10
  -1   5  10   47.07    5.65
   1   5  10   51.07    5.53
   2   5 -10   94.94    7.94
  -2   5 -10   83.74    7.35
   2  -5 -10   91.70    6.10
  -2  -5 -10   91.20    6.67
   2   5  10   90.72   10.77
  -2   5  10   89.22    7.57
   2   5  10   85.81   11.06
   3   5 -10    9.22    3.28
  -3   5 -10   11.45    4.04
   3  -5 -10    9.67    2.43
  -3  -5 -10    9.16    4.08
   3   5  10   10.03    4.11
  -3   5  10   11.67    3.27
   3   5  10   13.13    3.79
   4   5 -10    3.77    4.20
  -4   5 -10    1.71    2.10
  -4  -5 -10    0.30    1.86
   4   5  10    0.73    1.55
  -4   5  10    1.51    2.57
   4   5  10    0.37    1.55
   5   5 -10  129.91   14.50
  -5   5 -10  128.05    8.81
   5  -5 -10  126.63    7.61
  -5  -5 -10  138.20    8.77
   5   5  10  124.50   12.34
  -5   5  10  122.42    8.78
   5   5  10  131.46    8.55
   6   5 -10    2.18    2.45
  -6   5 -10    1.12    2.08
   6  -5 -10    1.82    1.96
  -6  -5 -10    2.59    3.30
   6   5  10    3.37    3.19
  -6   5  10    1.35    2.79
   6   5  10    2.55    2.79
   7   5 -10   83.92   13.97
  -7   5 -10   88.70    8.17
   7  -5 -10   68.03    7.25
  -7  -5 -10   93.10    8.95
   7   5  10   82.16   14.55
  -7   5  10   79.35    7.92
   7   5  10   85.80    7.45
   8   5 -10   43.96    7.26
  -8   5 -10   40.90    5.88
  -8  -5 -10   38.79    7.23
   8   5  10   42.33   15.08
  -8   5  10   35.91    9.36
   9   5 -10   47.21    8.23
  -9   5 -10   37.68    5.71
  -9  -5 -10   43.15    6.64
   9   5  10   40.30   14.48
  -9   5  10   39.15   13.79
  10   5 -10   82.51   18.96
 -10   5 -10   78.38    8.04
 -10  -5 -10   92.84   15.83
  10   5  10   84.40   16.34
 -10   5  10   86.82   15.61
  11   5 -10   16.60    6.67
 -11  -5 -10   19.56    3.90
  11   5  10   17.55    6.07
 -11   5  10   19.43    7.72
  12   5 -10   41.98   11.99
 -12  -5 -10   34.83   13.47
  12   5  10   32.31   10.17
 -12   5  10   33.64   14.61
  13   5 -10  103.07   19.18
 -13  -5 -10   97.45    9.69
  13   5  10   87.80   16.08
 -13   5  10   90.50   14.31
  14   5 -10    1.35    2.18
 -14  -5 -10    0.91    2.91
  14   5  10    3.35    3.61
 -14   5  10    3.70    2.64
  15   5 -10    0.95    1.67
 -15  -5 -10    2.76    3.71
  15   5  10    0.97    1.93
  15  -5 -10    1.75    3.00
 -15   5  10    1.67    3.05
 -16  -5 -10   34.45    6.70
  16   5  10   32.93   13.72
  16  -5 -10   39.60   11.47
 -16   5  10   53.54    8.72
   0   5 -11   32.82    6.54
   0  -5 -11   27.86    3.97
   0   5  11   22.58    5.31
   0   5  11   28.68    5.00
  -1   5 -11   49.19    6.57
   1  -5 -11   50.46    4.93
  -1  -5 -11   52.23    4.86
   1   5  11   46.15   12.39
  -1   5  11   53.63    6.37
   1   5  11   56.73    6.03
   2   5 -11   57.51    8.35
  -2   5 -11   65.08    7.77
   2  -5 -11   52.24    8.79
  -2  -5 -11   57.28    5.84
   2   5  11   49.10    8.77
   2   5  11   53.29    5.96
   3   5 -11  307.53   20.47
  -3   5 -11  283.50   18.43
   3  -5 -11  291.97   17.56
  -3  -5 -11  313.78   19.55
   3   5  11  284.35   21.38
  -3   5  11  295.00   20.63
   3   5  11  299.58   19.47
   4   5 -11    7.83    3.97
  -4   5 -11    6.03    3.08
   4  -5 -11    9.94    4.79
  -4  -5 -11   10.52    3.45
   4   5  11    8.46    4.36
  -4   5  11    8.35    5.38
   4   5  11   10.94    3.21
   5   5 -11    9.33    3.63
  -5   5 -11    7.32    3.59
   5  -5 -11   10.04    2.81
  -5  -5 -11    9.71    2.67
   5   5  11    7.77    4.16
  -5   5  11    8.59    4.55
   6   5 -11   23.89    6.62
  -6   5 -11   18.37    7.41
   6  -5 -11   15.30    7.65
  -6  -5 -11   20.71    3.72
   6   5  11   22.76    8.21
  -6   5  11   20.31    4.34
   6   5  11   17.23   10.22
   7   5 -11  111.49   16.10
  -7   5 -11  106.47   10.93
  -7  -5 -11  116.28   11.43
   7   5  11  104.57   26.10
  -7   5  11  110.36   11.18
   7   5  11  119.27   11.24
   8   5 -11  188.67   13.17
  -8   5 -11  181.48   11.37
  -8  -5 -11  178.65   11.63
   8   5  11  135.53   24.81
  -8   5  11  158.55   10.83
   8   5  11  157.91    9.80
   9   5 -11   17.15    4.98
  -9   5 -11    7.26    3.04
  -9  -5 -11    9.57    3.67
   9   5  11    7.40    2.76
  -9   5  11    9.19    4.59
  10   5 -11   34.90    8.48
 -10   5 -11   27.98    4.81
 -10  -5 -11   31.04    5.09
  10   5  11   29.17   14.17
 -10   5  11   30.95   12.48
  11   5 -11   12.86    7.48
 -11  -5 -11   10.54    3.64
  11   5  11    6.11    5.30
 -11   5  11   12.73    5.98
  12   5 -11   86.00   13.83
 -12  -5 -11   76.16   14.65
  12   5  11   66.90   17.50
 -12   5  11   92.03   15.06
  13   5 -11   27.73    9.79
 -13  -5 -11   24.64    9.70
  13   5  11   13.97    8.30
 -13   5  11   24.90   13.30
  14   5 -11    1.59    3.02
 -14  -5 -11    0.20    1.96
  14   5  11    1.54    4.72
 -14   5  11    3.66    3.42
   0   5 -12    4.16    4.34
   0  -5 -12    3.44    2.45
   0   5  12    1.40    2.96
   1   5 -12  131.99   13.25
  -1   5 -12  131.46   18.42
   1  -5 -12  129.05   11.38
  -1  -5 -12  134.77   11.94
   1   5  12  140.35   14.42
  -1   5  12  151.53   14.51
   1   5  12  132.17   12.44
   2   5 -12   89.73   14.38
  -2   5 -12   83.09   21.56
   2  -5 -12   97.53    9.18
  -2  -5 -12   99.37    9.50
   2   5  12   80.68   15.03
  -2   5  12   93.53   10.48
   2   5  12   92.36   14.70
   3   5 -12  129.92   14.25
  -3   5 -12  108.76   14.92
   3  -5 -12  115.33   10.61
  -3  -5 -12  116.93   13.20
   3   5  12  116.37   12.48
  -3   5  12  115.20   11.99
   3   5  12  124.63   12.22
   4   5 -12   63.98    7.59
  -4   5 -12   60.52    7.57
   4  -5 -12   60.91    5.15
  -4  -5 -12   63.21   10.87
   4   5  12   71.86   14.82
  -4   5  12   64.56    7.39
   4   5  12   66.75    6.95
   5   5 -12   69.35    8.39
  -5   5 -12   76.44    8.38
   5  -5 -12   72.74    8.20
  -5  -5 -12   71.81    6.71
   5   5  12   70.33   17.97
  -5   5  12   71.62    7.37
   5   5  12   72.15    6.64
   6   5 -12   36.57    6.87
  -6   5 -12   25.84   10.89
   6  -5 -12   35.01    4.50
  -6  -5 -12   34.49    4.78
   6   5  12   36.10   12.17
  -6   5  12   27.98    4.89
   6   5  12   23.83   10.59
  -7   5 -12    6.93    3.58
  -7  -5 -12    4.54    2.98
   7   5  12    6.91    4.77
  -7   5  12    6.31    3.09
   7   5  12    3.44    3.26
   8   5 -12    1.87    3.20
  -8   5 -12    3.17    2.56
  -8  -5 -12    2.71    3.22
   8   5  12    2.72    2.91
  -8   5  12    4.41    4.04
   8   5  12    5.25    3.21
   9   5 -12    3.67    4.02
  -9   5 -12    1.83    2.48
  -9  -5 -12    1.31    2.75
   9   5  12    2.63    3.01
  -9   5  12    3.54    3.10
  10   5 -12   28.09   11.59
 -10   5 -12   30.61    5.28
 -10  -5 -12   26.90    8.64
  10   5  12   30.11   10.52
 -10   5  12   27.71   12.11
  11   5 -12   17.54    5.82
 -11  -5 -12   16.54    3.75
  11   5  12   13.56    8.25
 -11   5  12   15.26   10.26
  12   5 -12    1.49    3.60
 -12  -5 -12    1.92    3.23
  12   5  12    2.33    4.06
 -12   5  12    2.17    2.71
 -13  -5 -12   32.88    6.34
   0   5 -13  185.79   12.05
   0  -5 -13  197.46   10.05
   0   5  13  192.74   11.32
   1   5 -13   61.08   11.03
  -1   5 -13   68.69    8.14
   1  -5 -13   64.39    6.14
  -1  -5 -13   66.69    6.45
   1   5  13   64.69    6.83
  -1   5  13   74.84    7.58
   1   5  13   66.73    6.93
   2   5 -13   63.39   15.54
  -2   5 -13   48.91    6.44
   2  -5 -13   45.48    5.19
  -2  -5 -13   50.82    4.79
   2   5  13   44.33   14.05
  -2   5  13   46.91    7.38
   2   5  13   59.59    7.73
   3   5 -13   58.15    8.40
  -3   5 -13   56.61    7.59
   3  -5 -13   51.19    6.56
  -3  -5 -13   53.96    8.77
   3   5  13   51.31   18.91
  -3   5  13   65.75    7.40
   4   5 -13   30.76    7.42
  -4  -5 -13   22.59    4.23
   4   5  13   24.12   14.03
  -4   5  13   25.15    7.09
   4   5  13   17.86   11.00
   5   5 -13    2.82    3.78
  -5   5 -13    0.27    1.77
   5  -5 -13    0.21    1.27
  -5  -5 -13    1.56    2.15
   5   5  13    1.59    2.98
  -5   5  13    2.53    3.85
   5   5  13    0.74    1.85
   6   5 -13  191.68   15.67
  -6   5 -13  195.16   14.73
   6  -5 -13  167.78   11.54
  -6  -5 -13  197.08   18.82
   6   5  13  201.86   15.95
  -6   5  13  189.07   18.50
   6   5  13  185.72   13.88
   7   5 -13    6.69    3.61
  -7   5 -13    5.38    3.36
  -7  -5 -13    9.52    3.59
   7   5  13    7.24    4.12
  -7   5  13    8.59    4.20
   7   5  13    4.59    4.17
   8   5 -13    5.84    5.03
  -8   5 -13    0.45    2.29
   8   5  13    2.21    3.62
  -8   5  13    2.90    3.55
   8   5  13   -0.29    1.43
  -9   5 -13   29.96    6.09
  -9  -5 -13   37.54    6.53
   9   5  13   33.62   14.75
  -9   5  13   24.96   17.20
  10   5 -13   12.89   12.26
 -10  -5 -13   18.48    5.01
  10   5  13   15.08   10.74
 -10   5  13   13.20   11.33
   0   5 -14    2.18    3.08
   0  -5 -14    2.51    2.32
   0   5  14    2.18    3.75
   1   5 -14    3.31    3.82
  -1   5 -14    1.31    3.22
  -1  -5 -14    2.68    2.66
  -1   5  14    0.39    1.98
   1   5  14    3.66    3.01
   2   5 -14    4.79    4.04
   2  -5 -14    0.31    0.83
  -2  -5 -14    2.92    2.35
   2   5  14    0.67    2.16
  -2   5  14    2.59    3.16
   2   5  14    2.12    2.83
   3   5 -14    3.74    4.45
  -3   5 -14    2.55    3.69
   3  -5 -14   -0.16    1.06
  -3  -5 -14    2.10    2.45
   3   5  14    1.11    2.23
  -3   5  14    2.34    2.91
   3   5  14    1.55    2.01
   4   5 -14  117.46   15.95
  -4   5 -14   99.18   12.72
   4  -5 -14   99.84   13.95
  -4  -5 -14  103.43   12.39
   4   5  14  100.07   16.78
  -4   5  14  117.84   15.08
   4   5  14  119.20   14.90
  -5   5 -14    4.69    3.98
   5  -5 -14    4.37    2.31
  -5  -5 -14    3.88    2.61
   5   5  14    3.78    3.18
  -5   5  14    2.63    3.77
   6   5 -14   48.26    8.65
  -6   5 -14   37.34    6.71
  -6  -5 -14   47.28    7.56
   6   5  14   35.66   14.92
  -6   5  14   42.11    7.15
   6   5  14   43.92   14.39
   7   5 -14    1.70    3.55
  -7   5 -14    2.93    3.46
  -7  -5 -14   -0.12    1.92
   7   5  14    1.89    2.56
  -7   5  14    5.00    3.32
   7   5  14    2.67    2.87
  -8   5 -14    5.03    3.68
  -8  -5 -14   -0.50    1.82
   8   5  14    1.06    2.81
  -8   5  14    4.01    3.11
   8   5  14   -0.07    1.56
   0   5 -15    8.94    3.70
   0  -5 -15    6.00    2.48
   0   5  15    9.94    3.56
  -1   5 -15   23.38    6.26
   1  -5 -15   16.22   10.96
  -1  -5 -15   22.09    7.21
  -1   5  15   24.43    5.81
   1   5  15   16.94   12.76
   2   5 -15   45.92    9.35
  -2   5 -15   49.86    8.95
  -2  -5 -15   36.22    9.99
  -2   5  15   42.32    7.05
   2   5  15   48.49    7.37
   0   6   0 1112.02   16.94
  -1   6   0    0.85    1.73
   1   6   0    0.16    1.35
   1   6   0    0.17    0.84
  -2   6   0   15.53    5.66
   2   6   0   15.95    5.78
   2   6   0   14.39    4.89
  -2   6   0   12.76    4.58
  -3   6   0    0.83    0.71
   3   6   0    0.71    1.42
   3   6   0    1.82    1.43
  -3   6   0    0.62    1.62
   4   6   0   36.04    9.36
   4   6   0   31.02    4.92
  -4   6   0   25.78    8.68
   5   6   0    1.54    2.12
   5  -6   0    1.14    1.07
   5   6   0    1.70    1.90
  -5   6   0    1.16    1.05
   6   6   0  308.47   17.26
  -6   6   0  331.38   19.84
   7   6   0    1.67    3.39
   7   6   0    0.38    1.31
  -7   6   0   -0.43    1.71
   8   6   0    3.74    2.67
   8   6   0    1.80    1.69
  -8   6   0    1.26    1.76
   9   6   0    2.95    3.67
   9   6   0    2.37    2.13
   9  -6   0    1.39    1.86
  -9   6   0    0.51    1.79
  10   6   0  377.49   23.15
  10  -6   0  348.27   18.76
 -10   6   0  364.86   19.97
  11   6   0    1.60    1.59
  11   6   0    0.37    2.57
  11  -6   0    0.64    1.74
 -11   6   0    0.34    1.59
  12   6   0  125.02   13.63
  12   6   0  114.25    7.79
  12  -6   0  144.51    8.42
 -12   6   0  124.01    8.28
  13   6   0    1.04    2.13
  13   6   0    1.88    2.77
  13  -6   0    1.51    2.17
  14   6   0   39.95   15.87
  14  -6   0   39.45    4.81
  15   6   0    1.69    2.62
  15   6   0   -0.09    1.96
  15  -6   0    1.23    2.01
  16   6   0    5.06    2.35
  16   6   0   10.01    3.59
  16  -6   0    7.21    2.73
  17   6   0    2.75    2.01
  17   6   0    2.85    3.73
  17  -6   0    2.35    2.55
  18   6   0   59.24   15.57
  18   6   0   58.58    8.60
  18  -6   0   61.14    7.19
  19   6   0    2.24    4.66
  19   6   0    1.95    3.29
  19  -6   0    1.71    2.78
   0   6  -1    1.14    2.30
   0   6   1    1.07    1.94
   1   6   1   62.33    7.04
  -1   6  -1   56.33    4.84
   1   6  -1   53.68    8.30
   1   6   1   58.43    5.65
   1   6   1   58.38    4.54
  -1   6   1   59.28    9.74
  -2   6  -1  198.92    9.94
   2   6  -1  187.38   11.07
   2  -6  -1  199.34    9.22
   2   6  -1  188.65    9.60
   2   6   1  211.11   10.46
   2   6   1  194.53    9.53
  -2   6   1  210.23   11.97
   3   6   1   99.22    7.73
  -3   6  -1  100.07    6.15
   3   6  -1   82.86   10.09
   3  -6  -1   97.29    5.22
   3   6  -1   95.15    5.67
   3   6   1  100.37   12.01
  -3   6   1   94.71   16.42
   4   6   1  262.26   14.51
  -4   6  -1  265.82   11.88
   4   6  -1  252.65   12.76
   4  -6  -1  261.98   10.99
   4   6  -1  256.52   11.61
   4   6   1  265.79   12.83
  -4   6   1  248.28   13.62
   5   6   1    3.71    3.95
  -5   6  -1    1.14    0.94
   5   6  -1    2.39    2.54
   5  -6  -1    0.81    0.68
   5   6  -1    2.32    1.58
   5   6   1    2.84    1.62
  -5   6   1    0.70    2.55
   6   6   1  103.65   10.58
   6   6   1   95.04   10.95
   6   6  -1   98.87    7.08
  -6   6   1  108.31   12.63
   7   6   1    9.46    3.74
   7   6  -1    9.48    4.18
   7   6   1    8.50    3.85
   7   6  -1    8.59    3.59
   7  -6   1    7.54    3.41
  -7   6   1    9.55    4.31
   8   6   1   80.41    8.88
   8   6  -1   82.59   19.18
   8   6   1   81.25   10.21
   8   6  -1   77.35    6.30
   8  -6   1   78.10    5.14
  -8   6   1   92.01   11.36
   9   6   1   28.69    9.00
   9   6  -1   24.52    7.08
   9   6   1   22.99    7.29
   9   6  -1   24.30   10.20
   9  -6   1   22.11    5.74
  -9   6   1   21.76   13.83
  10   6   1    0.93    1.49
  10   6  -1    0.74    1.56
  10   6   1    1.53    2.63
  10   6  -1   -0.07    1.30
  10  -6   1    1.17    1.28
  10  -6  -1    2.24    2.96
 -10   6   1    0.96    2.04
  11   6   1   10.38    5.73
  11   6  -1    8.11    4.05
  11   6   1   10.90    3.20
  11   6  -1    5.82    2.30
  11  -6   1    5.85    3.33
  11  -6  -1    9.81    2.76
 -11   6   1    9.11    4.51
  12   6   1    4.63    2.87
  12   6  -1    2.13    3.62
  12   6   1    2.43    3.67
  12   6  -1    1.41    2.33
  12  -6   1    3.08    1.80
  12  -6  -1    4.87    3.21
 -12   6   1    2.64    2.99
  13   6   1    8.93    3.58
  13   6  -1    9.93    3.79
  13   6   1    8.75    3.17
  13   6  -1    4.05    2.24
  13  -6   1    7.24    2.45
  13  -6  -1    4.83    2.45
 -13   6   1    4.98    3.23
  14   6   1   21.51   11.33
  14   6  -1   24.85    8.52
  14   6   1   23.26    4.83
  14   6  -1   20.30    4.24
  14  -6   1   16.06    3.42
  14  -6  -1   21.40    5.30
 -14   6   1   21.29   11.83
  15   6   1    9.52    4.53
  15   6  -1   10.01    4.16
  15   6   1    8.48    3.05
  15   6  -1    6.70    3.18
  15  -6   1    3.81    2.49
  15  -6  -1    5.50    2.92
 -15   6   1    5.69    4.08
  16   6  -1   15.40    7.50
  16   6  -1   17.06    4.69
  16  -6   1   12.38    3.11
  16  -6  -1   13.74    9.88
 -16   6   1   15.86   10.31
  17   6  -1    4.01    3.82
  17   6   1    1.71    2.29
  17   6  -1    5.25    3.71
  17  -6   1    3.39    3.34
 -17   6   1    2.04    2.75
  18   6  -1    0.96    2.59
  18   6   1    3.00    3.38
  18   6  -1    1.80    2.18
  18  -6   1    1.86    1.94
  19   6  -1    3.05    4.08
 -19  -6  -1    1.35    3.16
  19   6   1    2.49    2.57
  19   6  -1    3.55    3.17
  19  -6   1    1.22    2.76
  19  -6  -1    1.81    2.74
   0   6  -2  209.57   10.85
   0  -6  -2  215.56   10.16
   0   6   2  218.40   11.15
   1   6  -2   13.54    4.08
  -1   6  -2   12.43    4.46
   1  -6  -2   14.47    2.29
  -1  -6  -2   13.84    2.77
   1   6   2   15.05    6.74
   1   6   2   12.30    4.31
  -1   6   2   15.80    4.96
  -2   6  -2    6.30    3.25
   2   6  -2    6.84    3.00
   2  -6  -2   13.24    2.53
  -2  -6  -2    9.40    2.71
   2   6  -2    7.51    3.59
   2   6   2   13.45    5.21
   2   6   2   10.05    4.33
  -2   6   2    9.97    4.23
  -3   6  -2  174.99    9.03
   3   6  -2  172.67   15.26
   3  -6  -2  180.87    8.03
  -3  -6  -2  195.03   10.95
   3   6  -2  186.64    9.94
   3   6   2  183.71    9.40
   3   6   2  183.52    9.40
  -3   6   2  170.34   10.18
  -4   6  -2    5.35    2.49
   4   6  -2    5.02    3.67
   4  -6  -2    6.23    1.55
   4   6  -2    5.18    1.96
   4   6   2    6.14    2.67
   4   6   2    6.74    3.02
  -4   6   2    4.12    1.87
  -5   6  -2    0.36    0.99
   5   6  -2    0.72    1.53
   5  -6  -2    0.08    0.56
   5   6  -2    0.77    1.40
   5   6   2    0.59    1.45
   5   6   2    0.95    1.23
  -5   6   2    0.62    1.86
   6   6   2  167.61   11.00
   6   6  -2  157.55   10.24
  -6   6   2  180.92   12.46
   7   6  -2  305.93   19.54
   7   6   2  291.87   17.42
   7   6  -2  290.90   15.96
   7  -6   2  264.64   14.72
  -7   6   2  296.10   18.53
   8   6  -2  147.73   15.10
   8   6   2  142.24    8.96
   8   6  -2  129.22    8.93
   8  -6   2  129.39    6.59
  -8   6   2  136.00    9.04
   9   6  -2   48.47   15.58
   9   6   2   42.27   11.73
   9   6  -2   36.82    8.86
   9  -6   2   33.42    4.36
  -9   6   2   38.96   10.15
  10   6  -2   72.95   18.04
  10   6   2   71.27   14.06
  10   6  -2   71.95    5.69
 -10   6   2   72.21   12.60
  11   6  -2   58.39   14.65
  11   6   2   58.75   11.92
  11   6  -2   52.84    5.18
  11  -6  -2   66.25    5.83
 -11   6   2   65.20   10.17
  12   6  -2    5.06    2.44
  12   6   2    2.03    1.99
  12   6  -2    3.72    2.28
  12  -6   2    4.01    2.68
  12  -6  -2    5.21    3.50
 -12   6   2    3.63    3.16
  13   6  -2   66.57   18.03
 -13  -6  -2   58.48   11.24
  13   6   2   48.67   11.36
  13   6  -2   56.15    5.93
  13  -6   2   49.60    5.07
 -13   6   2   60.15   11.44
  14   6  -2    2.51    2.63
 -14  -6  -2    0.81    2.52
  14   6   2    3.69    3.75
  14   6  -2    1.05    2.37
  14  -6   2    1.68    2.03
  14  -6  -2    2.43    3.46
 -14   6   2    2.10    3.25
  15   6  -2   78.03   15.22
 -15  -6  -2   87.55    9.24
  15   6   2   71.37    7.55
  15   6  -2   70.25    6.95
  15  -6   2   70.64    5.65
  15  -6  -2   86.85    7.41
 -15   6   2   69.44   16.50
  16   6  -2   25.65   12.57
 -16  -6  -2   33.45    6.44
  16   6   2   27.38    5.82
  16   6  -2   18.97   11.24
  16  -6   2   28.11    4.14
  16  -6  -2   21.64    7.11
 -16   6   2   25.98   19.31
  17   6  -2  118.70   22.19
 -17  -6  -2  151.11   13.84
  17   6  -2  115.55   13.26
  17  -6   2  130.58   10.34
  17  -6  -2  144.42   12.22
 -17   6   2   96.98    9.01
  18   6  -2   23.18   11.02
 -18  -6  -2   24.49   10.56
  18   6   2   22.63    5.18
  18   6  -2   16.15    6.56
  18  -6   2   28.64    4.88
 -18   6   2   17.50   11.96
  19   6  -2    4.77    3.99
 -19  -6  -2    4.51    3.91
  19   6   2    4.18    4.87
  19   6  -2    2.03    2.89
  19  -6   2    5.40    3.24
  19  -6  -2    5.02    3.97
 -19   6   2    1.96    2.62
   0  -6  -3    0.01    0.98
   0   6   3    0.59    1.42
   0   6   3    0.09    0.92
   1   6  -3  161.59    9.85
  -1   6  -3  154.70    9.24
   1  -6  -3  160.14    7.88
  -1  -6  -3  164.37    8.61
   1   6   3  155.21    8.86
   1   6   3  150.15    9.18
  -1   6   3  155.63    8.78
   2   6  -3   51.79   12.81
  -2   6  -3   52.19    8.30
   2  -6  -3   63.74    3.93
  -2  -6  -3   56.53    5.35
   2   6   3   59.27    8.13
   2   6   3   57.70    7.69
  -2   6   3   57.65    9.67
   3   6  -3   42.65   11.65
  -3   6  -3   31.54    6.95
[truncated: 59,279 more chars]
